# Supplementary material for: An Insight into the Sialotranscriptome of the Cat Flea, Ctenocephalides felis
Source: PLoS One. 2012 Sep 25;7(9):e44612. doi: 10.1371/journal.pone.0044612 (PMC3458046; doi:10.1371/journal.pone.0044612)
Supplement: File S1 — Hyperlinked Excel spreadsheet containing annotated assembled ESTs. (S1): http://exon.niaid.nih.gov/transcriptome/C_felis/Cf-S1.zip. (XLSX) [file pone.0044612.s001.xlsx]

## Sheet: cf-5-36-ALL
Assembled contig	Number of ESTs	Comments	Number of ESTs	Assembler output	Fasta file	Average qual value	Percent N	Percent AT	PA at	Reverse?	Number of sequences	Name of larger sequence	PolyA at	Length of nt seq	Larger orf (nt)	Larger pep	Frame of larger ORF	Average Result	Frame of SignalP	Number of sequences	Clustered at 30%-Id- on 50% of length - - Cluster#	# seqs	Clustered at 35%-Id- on 50% of length - - Cluster#	# seqs	Clustered at 40%-Id- on 50% of length - - Cluster#	# seqs	Best match to XC-ASB database	E value	Comments	Class	Dbase	Eval	Coverage	Best match to NR protein database	E value	Match	Score	Extent of match	Length of best match	% identity	% Coverage	Mismatches	Gaps	First residue of match	First residue of sequence	Number of segments	Frame	Frame shift?	Stop codon %
Putative secreted proteins
Enzymes
Phosphatase			81
cf-contig_693	1	truncated salivary phosphatase	1	Contig-693	Contig693	63.4	.	70.8	450	N	1	P9-1188486_009_D01	450	469	366	RPGKPKGTLIDGTTFNVTNFFPDVGATIVFELHKLRRNNWRVKILYNQHTYGDFQLLTYRGCNKFKYYPGYSCNWNIIKRIMEDNYMHKGKPVDFCRSRRHQHKRFKHVEIVPKAHTTHRNY	1	Cyt		1	565	1	580	1	592	1	XC-contig_51	0.052	truncated salivary phosphatase	s/				secreted salivary protein	0.078	gi|121511926	40.8	57	391	27	15	42	0	301	13	1	1	N
cf-contig_735	1	truncated salivary phosphatase	1	Contig-735	Contig735	46.2	0.1	68.9	1155	N	1	P10-1189215_066_H10	1155	1174	900	PGXEEIDDLYRYRLGIQKWNKTNYWSIASTSPRTIQAALVLGAGLENKPYKINRIWSEKSKESTQFSAMKQYLRFYNKDQCPAYLENVFSERRQFKEVDEDFMKAVSIFEKELSKKKLDVYKRPQDVWLTYESMFNVFYSYKKKYPHKLKYWKKVRKEFKEFSQQLMWTSLIGSNRLRKLASGPITYDVINDMDKLTNNKPQPNAPGKDKNKLSVLTAPQGVFAALVTGFAPNGTTINGKEFSASDLYPEHGAMHVIELYKEGENSWKVKILYRNKKHDCLKIVKVPDCKHEDLCEYNTF	1	Cyt		1	595	1	611	1	625	1	XC-contig_49	8e-07	truncated salivary phosphatase	s/	NR	3e-94	81.3	secreted salivary protein	3E-094	gi|121511926	350	313	391	52	80	151	0	76	10	1	1	N	0.319
cf-contig_402	1	truncated salivary phosphatase	1	Contig-402	Contig402	54.8	.	72.6	204	N	1	P15-1189826_049_H07	204	223	120	GGWLPIKVQGCNSHMCQYETLKKSLRKYIIDDSTHKQACK	3	Ind		1	328	1	336	1	337	1	XC-contig_7	2e-28	truncated salivary phosphatase	uk				truncated secreted salivary acid phosphatase	1.1	gi|121511922	37	33	246	48	14	18	0	212	18	1	3	N
cf-contig_421	1	truncated salivary phosphatase	1	Contig-421	Contig421	64.2	.	72.3	317	N	1	P16-1189909_036_G06	317	336	177	RGHKLMFFILNLVQDVALVMEEVYQEVAVHNVRKNAICQKEVTAIAVEIVHVFLNNNLN	3	Cyt		1	343	1	352	1	355	1	XC-contig_7	6e-47	truncated salivary phosphatase	s/	NR	3e-07	57.8	cysteine-rich secreted salivary protein	3E-007	gi|121511982	58.9	46	83	54	57	22	0	37	23	1	2	N
cf-contig_423	1	truncated salivary phosphatase	1	Contig-423	Contig423	63.4	.	74.8	283	N	1	P16-1189915_084_G12	283	302	117	GRGLQHEDLCEYNTFKNSLKAIRMTDENHQKLCHKSDLE	1	Ind		1	345	1	354	1	357	1	XC-contig_7	4e-83	truncated salivary phosphatase	uk				truncated secreted salivary acid phosphatase	7.2	gi|121511916	34.3	26	374	44	7	15	0	346	19	1	1	N
cf-contig_358	1	truncated salivary phosphatase	1	Contig-358	Contig358	62.4	.	73.1	312	N	1	P14-1189521_030_B04	312	331	210	AGVKEVDKWRVKMMYRNGENKKYETIKLPDCEDMCPLKKFKEILNKYKLTKKSRKNNVKQINFPIQVRYF	2	Cyt		1	71	2	63	2	296	1	XC-contig_169	0.0004	truncated salivary phosphatase	s/	NR	2e-08	14.8	secreted salivary phosphatase	2E-008	gi|121511920	62.4	55	377	42	15	32	0	321	11	1	2	N
cf-contig_766	1	truncated salivary phosphatase	1	Contig-766	Contig766	63.1	.	71.8	399	N	1	P13-1189417_064_A08	399	418	267	RGPRGKKFGNEEITDEMFYPDIGATHILELYKEVDKWRVKMMYRNGENKKYETIKLPDCEDMCPLKKFKEILNKYKLTKKEQKKQCKTD	3	Cyt		1	71	2	63	2	651	1	XC-contig_169	8e-10	truncated salivary phosphatase	s/	NR	2e-16	22.4	secreted acid phosphatase	2E-016	gi|121511908	89	84	378	44	22	47	0	292	9	1	3	N
cf-contig_393	1	truncated salivary phosphatase	1	Contig-393	Contig393	66.1	.	70.1	580	N	1	P15-1189785_008_E02	580	599	291	TTIDAKLFDPDDLYPEHGAMHIIELYQTIDNKWQVKILYRKKKKDCLKALRLPGCNKKGKLPPNFCALNHLKSAVNEISLEPVKHDKLCKDPAEFYK	2	Cyt		1	72	2	64	2	59	2	XC-contig_169	8e-11	truncated salivary phosphatase	s/	NR	3e-20	27.8	secreted salivary protein	3E-020	gi|121511926	102	102	391	45	26	59	0	289	8	1	2	N	0.98
cf-contig_510	1	truncated salivary phosphatase	1	Contig-510	Contig510	64.9	.	70	557	N	1	P20-1190294_051_G07	557	576	318	RGTGFAPNGTSIDAKLFDPDDLYPEHGAMHIIELYQTIDNKWQVKILYRKKKKDCLKALRLPGCNKKGKLPPNFCALNHLKSAVNEISLEPVKHDKLCKDPAEFYK	3	Cyt		1	72	2	64	2	59	2	XC-contig_2	5e-06	truncated salivary phosphatase	s/	NR	4e-18	25.3	secreted salivary protein	4E-018	gi|121511926	95.5	92	391	44	24	55	0	299	15	1	3	N
cf-contig_47	17	truncated salivary phosphatase	17	Contig-47	Contig47	88.1	.	67.2	895	N	17	P13-1189499_034_H06	895	915	771	AGGQRERRKTIFSSFGEYAKFYSPKTCPNFIAQQKIAVRDLLTKSAKDYKNSLAKLKEAYKIDATTSPQNVWLAYETLNLQSKQNNAPTWWNTVNKDLKQFSEKYLWTALTSNDNLRKMSGGRMINDILNDIENIKKGEGQPGAPGGKENKLSVLTVPQAILAAFVSAFAPEGTKIENKDLDPSTLYPGQGALHVIELHQDKSDWSIKVLYRNNDQMKLKPMKLAQCGDKCSYGTFKSMLQKYNMEKEAHDKLCKTS	3	Cyt		17	14	3	12	3	12	3	XC-contig_93	0.007	truncated salivary phosphatase	s/	NR	8e-47	67.3	truncated secreted salivary acid phosphatase	8E-047	gi|121511916	192	250	374	36	67	160	2	123	18	1	3	N
cf-contig_48	5	truncated salivary phosphatase	5	Contig-48	Contig48	91.5	.	69.4	461	N	5	P8-1189052_027_C03	469	480	339	PGGKENKLSALTVPQAILAAFVSAFAPEGTKIENKDLDPSTLYPGQGALHVIELHQDKSDWSIKVLYRNNDQMKLKPMKLAQCGDKCSYGTFKSMLQKYNMEKEAHDKLCKTS	1	Cyt		5	14	3	12	3	12	3	XC-contig_158	0.056	truncated salivary phosphatase	s/	NR	2e-19	45.1	truncated secreted salivary acid phosphatase	2E-019	gi|121511922	99.4	110	246	41	45	65	0	135	1	1	1	N
cf-contig_49	1	truncated salivary phosphatase	1	Contig-49	Contig49	57.7	.	66.3	867	N	1	P20-1190230_029_B03	867	886	765	RETRRETVFSLFGEYAKFYSPRSCPNFIEQQKMAVKDLLTKGATNYKNLFAKLKKEAYKIDATKGPQNVWLAYETLNLQSKLNQAPEWFESMKNELKSFSEEYLWRALTSNENLRKMSGGRMINDILNDIDSIKEGKGQPGAPGKTGNKLSVLTVPQAILAAFVSAFAPKGTKIENQDLGPSSLYPGQGALHVIELHKDNNQWSVKVLYRNNDKMELRPMKLPSCDDKRPYETFKSTLQSYDMKKQDRDKLCKKQ	3	Cyt		1	14	3	12	3	12	3	XC-contig_32	0.22	truncated salivary phosphatase	s/	NR	2e-42	68.9	truncated secreted salivary acid phosphatase	2E-042	gi|121511916	177	251	374	35	67	166	6	122	6	1	3	N
cf-contig_123	7	truncated salivary phosphatase	7	Contig-123	Contig123	82.7	.	70	801	N	7	P3-1188576_059_C07	815	820	621	TAGGRKLGVKDPHNPLLVWYMYELYTAQKCTNVTLPPWADQNMFDTIEKCIQTFLNIAFGADELKKLSGGIYVDMMLKEFDRFINEKNTNKEKLLRLFSGHDTTVAPALAALGGSQGFTKDGKDFTVNIPSYGATIVTELHQGKDGNHFIKISYWNKGEESELIVKGCGDTSCCSLDKYKNLVKDIRIGKEELTNCKMPIGNNNFAK	1	Cyt		7	18	3	17	3	16	3	XC-contig_95	3e-10	truncated salivary phosphatase	met/lipd	KOG	2e-20	48.4	Testicular acid phosphatase-like protein	9E-015	gi|307172361	85.5	167	382	30	44	127	2	194	43	1	1	N
cf-contig_148	2	truncated salivary phosphatase	2	Contig-148	Contig148	74.4	.	74.6	453	N	2	P20-1190265_008_E02	472	472	285	YGRGGSQGFTKNGQDFTVNIPKYGATVVTELYKGSDGKHYIKILYWNDGKESELVVKGCGNTSCCSLETYKNLVQPIRISKEEVQKCAMTQGNNF	1	Ind		2	18	3	17	3	16	3	XC-contig_78	0.0003	truncated salivary phosphatase	met/lipd	KOG	3e-06	18	hypothetical protein TRIADDRAFT_52339	3E-004	gi|195996575	48.9	69	317	31	22	51	1	248	61	1	1	N
cf-contig_79	13	truncated salivary phosphatase	13	Contig-79	Contig79	86.8	.	68.3	956	N	13	P6-1188851_046_B06	956	991	813	PGGLENNTRKAFGEWTEQQLNSTYFAAMPGFLRFLKPSECPAYFKELRQQSQAIKTIASEYQDTINAINSKYPSIGTANPENVWIAYETFKRMQQQKKEGMDWLNSTIMKNLKGFSSKYVLTALTSTEKLRKLAGGLILKDLLNDMDELTKDKAQPHAPGKKDNKMNIFVVPQALLAAQMAVFTPNGTKISNQDVTASNFYPDDGSYVVIELYKNKETWKVQIRYNSDKTSGWRTVKVTGCTKNICPYDTFKNAVNSYAISEEEHVKLCRI	1	Cyt		13	33	2	106	1	101	1	XC-contig_7	5e-24	truncated salivary phosphatase	s/	NR	3e-68	71.6	truncated secreted salivary acid phosphatase	3E-068	gi|121511916	263	266	374	44	71	148	0	107	7	1	1	N
cf-contig_261	1	truncated salivary phosphatase	1	Contig-261	Contig261	60.8	.	70.6	631	N	1	CAFM_P2-059_C07	631	650	480	NLKKFSSEFVLIALTSTDQMRKLAGGLILKDLFNDIDELTKDHAQPHAPGGIKNKMNIFVVPQAILAAQMAVFMPEGTKLRDQPITASNFYPDDQSNVIIELYQDKNKWNVQLQYKNNKNSGWLPIKVQGCNSPMCPYDTLKKSLNKYIIDDARHKQACK	3	Cyt		1	33	2	212	1	210	1	XC-contig_27	2e-15	truncated salivary phosphatase	s/	NR	2e-39	42.7	truncated secreted salivary acid phosphatase	2E-039	gi|121511916	166	158	374	48	43	83	0	215	3	1	3	N
cf-contig_220	3	truncated salivary phosphatase	3	Contig-220	Contig220	76.1	0.3	69.5	777	N	3	P6-1188847_014_B02	799	796	654	LRPGNILPKCEKKLXMVEIQXFSALKSKVQKNIKDAKDEDMWKLYNHFLSLKNDNKDLPSWLTYDDLLDMKEYVDTYIRTFSKTVELKQLSAGKYVKEFVDSLDKYQRRREGPPIKIFAAEEMSFAAIVAALGGDKNFKICDEEKPFGWPKNGAMIIGELHTESSTRYKFFKLLFWDPDEEKPQELHLNNCKGCDWYQYMHTTSKIREFGKNSKTCQG	1	Cyt		3	178	1	181	1	179	1	XC-contig_2	6e-09	truncated salivary phosphatase	met/lipd	KOG	6e-09	45	venom acid phosphatase Acph-1-like	1E-006	gi|328782963	58.5	145	363	25	40	119	0	161	64	1	1	N
cf-contig_246	1	truncated salivary phosphatase	1	Contig-246	Contig246	26.1	.	70.5	868	N	1	P9-1188543_066_H10	868	887	684	PIIGDVSHIFLAFIPYNITGKTLGYTIVLALPKHPFFPLSFDPIKPHYMWKIHEYFQAQRFGGKPLKDWLTESLMLDMEESSKLFVTSLFQYAYAKKISAGAYTNGILEDFKKMKNNQNGQPPLQLLCADELIVAAAIATLTKPENNICGNKFDMVVPKHGTALIVELHKSQNQHLVKVLHWNSNADEPKAIKYKFGKDKCTLDHFEKMLKETITPYDEELDKCGIPK	2	Anch		1	194	1	197	1	195	1	XC-contig_2	4e-09	truncated salivary phosphatase	met/lipd membrAnchor	KOG	6e-09	48.9	secreted salivary acid phosphatase	4E-005	gi|121511918	53.5	192	380	21	51	152	11	182	230	1	2	N
cf-contig_370	1	truncated salivary phosphatase	1	Contig-370	Contig370	63.7	.	72.3	462	N	1	P14-1189579_004_G02	462	481	393	GGVFANLILDEFNKKISNNNNNQHVLQLLCAQEIIVATAISALTNSKSSICDKTIDIGVVKHGTALIAELHKKNSEYYVKVFLWNPDADEPKQIKYGECSNGECTFEKFQEILKYTAITEEKLRNSVYCKS	2	Ind		1	299	1	306	1	307	1	XC-contig_7	3e-53	truncated salivary phosphatase	met/lipd	KOG	6e-06	28.4	venom acid phosphatase Acph-1-like	0.007	gi|328790726	44.3	98	361	27	27	82	0	249	5	1	2	N
cf-contig_609	1	truncated salivary phosphatase	1	Contig-609	Contig609	42.7	.	67.7	566	N	1	P5-1188824_017_H03	566	585	333	RGSKGFTHSYEVASIEPEKNETVVNVTVNSFRPFHGGMVIVEAHQLNNDKDFWLRVFVSGSTSSPIEELKINDCTYPCSYQKLKEKLQSSQLAVNMQDWLKACNIGSSWKK	3	Cyt		1	495	1	507	1	517	1	XC-contig_150	0.001	truncated salivary phosphatase	s/	NR	2e-08	16.9	secreted acid phosphatase	2E-008	gi|121511904	63.5	71	436	37	17	46	0	362	183	1	3	N
cf-contig_50	20	truncated salivary phosphatase	20	Contig-50	Contig50	92.7	.	67.2	574	N	20	P7-1188957_028_C04	573	607	504	GRGALPTCKGEGEVIKTMSRKVYETAFSITSLKRLSAGRYVSHLLDDVDHLRTKGETPDGKKMVLFGTTPPFLKSIMSAMGGDEGYHSENLLPHPEAGSMFITEVYQKVEEQTYHIRLHYSNNPSQPISDKNILKLRGCDELCEFDKFKNLMKPMYLSKDDADKECLE	1	Cyt		20	105	1	97	1	90	1	XC-contig_169	3e-21	truncated salivary phosphatase	s/	NR	6e-73	100	truncated salivary phosphatase	6E-073	gi|121511984	277	152	153	84	100	23	0	1	46	1	1	N
Apyrase			13
cf-contig_80	10	salivary apyrase	10	Contig-80	Contig80	92.8	.	67.9	452	N	10	P13-1189503_066_H10	460	471	381	GRIWKKLQLVCRYPNSKEPFLCLDLIYIHTLLTKGFRLHNSNIVEMLNSYDNHELSWALGFAYSKIMKTMPPATPVLDMREKSKKKVQCSTYKSKVKTEPILAKTEPTPASPVPTVNPDPTKPTVPK	3	Cyt		10	34	2	27	2	25	2	XC-contig_169	7e-08	salivary apyrase	s/	NR	1e-11	21	putative salivary apyrase	1E-011	gi|121512034	73.6	91	437	41	21	54	8	336	6	1	3	N
cf-contig_81	2	salivary apyrase	2	Contig-81	Contig81	73.2	.	69	443	N	2	P8-1189098_003_G01	443	462	372	GPLEKFGKSYNWVCRYPNSKEPFLCLDLIYIHTLLTKGFRLHNWNIVEMLNSYDNHELSWALGFAYSKIMKTMPPAIPVLDIRKKSKRNKSECSTYELKAKTKPTPATPVPTVNSDPTKPTVPK	3	Cyt		2	34	2	27	2	25	2	XC-contig_169	7e-08	salivary apyrase	s/	NR	7e-11	15	putative salivary apyrase	7E-011	gi|121512034	70.9	65	437	50	15	33	0	362	69	1	3	N
cf-contig_653	1	salivary apyrase	1	Contig-653	Contig653	63.	.	68.3	545	N	1	P8-1189028_031_A03	545	564	417	GDGVSALRPGSRKVKPKPLGLSEEQSVALSAFYYRGNAAKLIVGEGGNTTLGEIWKKAEEECAMVHLKDPNDPFLCMDLIYIHTLLKYGFGLKDCNRIEMILKLDNHELSWALGFAYSELVKQYNLSKNIDSENQIEKK	2	Cyt		1	534	1	546	1	558	1	XC-contig_206	2e-05	salivary apyrase	s/	NR	2e-38	31.5	putative salivary apyrase	2E-038	gi|121512034	162	137	437	60	32	54	6	296	38	1	2	N	0.73
5'-nucleotidase			2
cf-contig_791	1	5'-nucleotidase	1	Contig-791	Contig791	64.3	.	69.5	322	N	1	P12-1189341_028_C04	322	341	222	TAGTVYTLITSSYVAQGGDGYSVLLESTVNKTNMGILDTRALADYFEKTNNITEKFLQGLPPNIIIAKEYVAKT	1	Cyt		1	97	2	89	2	80	2	XC-contig_169	5e-17	5'-nucleotidase	s/	NR	3e-05	47	5'-nucleotidase	3E-005	gi|353590529	52.4	56	120	40	48	34	0	57	10	1	1	N
cf-contig_806	1	5'-nucleotidase	1	Contig-806	Contig806	58.6	.	65.5	288	N	1	P12-1189391_036_G06	288	307	264	GESGHYPAGEYATYEETTVYTLITSSYVAQGGDGYSVLLESTVNKTNMGILDTRALADYFEKTNNITEKFLKGLPPNIIIAKEYVAKT	3	Cyt		1	97	2	89	2	80	2	XC-contig_169	3e-21	5'-nucleotidase	s/	NR	3e-06	50	5'-nucleotidase	3E-006	gi|353590529	55.5	59	120	40	50	36	0	54	45	1	3	N
Adenosine deaminase			16
cf-contig_60	6	Adenine deaminase/adenosine deaminase	6	Contig-60	Contig60	94.3	.	63.2	402	N	6	P9-1188463_014_B02	469	421	291	RPDDPGFWGAKGVTYDWYEAFMGLAARWQDLRLLKQLALNSIEQTSLNRKQKYELWRLWNKKWNRFIHDVIRYKGIFPEEKKPKKNAIPKYVKALGE	1	Cyt		6	7	4	7	4	5	4	XC-contig_43	0.0003	Adenine deaminase/adenosine deaminase	s/met/nuc	KOG	9e-17	18	adenosine deaminase CECR1-like	4E-015	gi|345479107	85.1	69	505	51	14	34	0	434	7	1	1	N
cf-contig_61	1	Adenine deaminase/adenosine deaminase	1	Contig-61	Contig61	43.2	.	58.6	684	N	1	P20-1190255_026_D04	684	703	459	GQEKEKTKFNFHAKQKKMKRISFGCPPGARVVVGRENYWGRACIHPSGKVPHKWGEKRYEGACFLSLTGGRNRGRTRLILRRHPPPFPTVEQQKKRRPGILGSQRSHIRLVRSVYGSCSQVARPSIAQAVGIEFHRANFSKPKTKIRTVEIME	3	Cyt		1	7	4	7	4	5	4	XC-contig_43	0.0008	Adenine deaminase/adenosine deaminase	s/met/nuc	KOG	2e-16	18	adenosine deaminase CECR1-like	9E-015	gi|345479107	85.1	69	505	51	14	34	0	434	289	1	1	N
cf-contig_59	8	Adenosine deaminase CECR1 - metal ion binding - inosine biosynthetic process - proteoglycan binding - hypoxanthine salvage - protein homodimerization	8	Contig-59	Contig59	78.1	.	63.8	387	N	8	P2-1190427_058_D08	388	406	276	AGGGAKGVTYDWYEAFMGLAARWQDLRLLKQLALNSIEQTSLNRKQKYELWRLWNKKWNRFIHDVIRYKGIFPEEKKPKKNAIPKYVKALGE	1	Cyt		8	7	4	7	4	5	4	XC-contig_206	2e-05	Adenosine deaminase CECR1 - metal ion binding - inosine biosynthetic process - proteoglycan binding - hypoxanthine salvage - protein homodimerization	st	GO	1e-12	12.1	adenosine deaminase CECR1-like	1E-012	gi|334348144	77	65	513	51	13	32	0	446	10	1	1	N
cf-contig_62	1	Adenosine deaminase CECR1 - metal ion binding - proteoglycan binding - adenosine receptor binding - hydrolase - purine ribonucleoside monophosphate - signalP detected	1	Contig-62	Contig62	64.2	.	58.6	677	N	1	P3-1188547_016_A02	677	696	498	EFGGRVVVGREKDWARVCSHKASKGCRIHKEKKNRNRTCPISNQVLGLVKDMRNHPAAAMFTDDYPIVIAPDDPGFWGAKGVTYDWYEAFMGLAARWQDLRLLKQLALNSIEQTSLNRKQKYELWRLWNKKWNRFIHDVIRYKGIFPEEKKPKKNAIPKYVKALGE	1	SIG	3,	1	7	4	7	4	5	4	XC-contig_43	0.0002	Adenosine deaminase CECR1 - metal ion binding - proteoglycan binding - adenosine receptor binding - hydrolase - purine ribonucleoside monophosphate - signalP detected	st	GO	9e-42	20	Adenosine deaminase CECR1	2E-044	gi|332031314	129	152	517	58	30	41	0	358	20	2	1	Y
Esterase			15
cf-contig_100	7	truncated esterase	7	Contig-100	Contig100	77.7	.	71.1	713	N	7	P17-1189953_012_C02	845	885	564	MKYVDLMGDAWFNYGVFKTLKSIINTNRRKENTYFYKLSDSSYSVYKTYIITKYSDLPGVCHADDLGYLFRVYGDSRGFIKLTIPKEGMLTHQRLVKMWSNFAKTGNPLQEKANGGNALEKKKGDDPLSKVTWEKVDKGNIKYLDITEDEELKMKQFQEVEGQRFNLWDKLYEIGQEIFKNKKPDTKL	1	Cyt		7	118	1	113	1	110	1	XC-contig_52	6e-27	truncated esterase	s/esterase	NR	6e-49	79.7	putative truncated esterase	6E-049	gi|121511890	199	166	227	53	74	84	0	59	46	1	1	N	0.602
cf-contig_781	1	truncated esterase	1	Contig-781	Contig781	65.1	0.2	72.5	636	N	1	P13-1189476_053_F07	636	655	546	GRXNAWFNYGVFETLHKIVDSNKRKQKTYFYKLSDDSYSVYKKYVLTKYKDFPGVCHSDDLGYLFKMFESTGIISASIPSKAQLTHRRMVKMWSNFAKTGDPLPKEENKDKSQDSDLKELNWNPVNKTNIQYLDIAKEETTMRSFNDIEEERYQLWKNLFEIGKEFKKRTKEQLEKQCLQKE	1	Cyt		1	626	1	647	1	663	1	XC-contig_49	2e-05	truncated esterase	s/esterase	NR	7e-40	66	putative truncated esterase	7E-040	gi|121511890	168	141	227	54	63	69	1	86	7	1	1	N
cf-contig_56	7	truncated esterase	7	Contig-56	Contig56	95.1	.	67.9	632	N	7	P5-1188741_032_A04	632	652	552	GRGFLHGLYYSMRAIHYNKERTSKTYFYRLSDDSYSIFKNFISKSRMKLSGVSHTDDLGYLFAMSQEYNIGWYTLRIYSEIPKEAQETHKKMITLWTNFAKTGDPLKSWISEKKRPKPPYGDISEITWNPFNIKDPKYLDMANEGFNMKNFEEQQRMEPWNELHAEYHRYILDLEEKRKLKEKK	2	Cyt		7	31	2	25	2	23	2	XC-contig_67	2e-16	truncated esterase	s/esterase	NR	2e-18	62.1	putative truncated esterase	2E-018	gi|121511890	96.7	123	227	37	55	88	0	90	11	1	2	N
Antigen 5 family			15
cf-contig_51	3	salivary allergen 2	3	Contig-51	Contig51	78.8	.	68.1	752	N	3	P1-1152493_046_B06	794	790	627	PGNKEMQNAFLKEHNEKRRLVASGEGLIEHGAKKTPPAAKMPDLKWNDALAKLAIFNVRQCEMKHDCADTMHGHTGQNLFFYGTTGNAITNKTIAKMAVEGWYSESNDTRLEDIEKLTTIYPNGKPIGHYTQLIWGNTTKVGCAVSTYKKRLENNNMMFNFTLVACNYRYGNTLEYPVYKIKNGTNSEPSRKNKPQQSNKKIKKQENSA	2	Cyt		3	29	2	24	2	91	1	XC-contig_62	1e-19	salivary allergen 2	s/	NR	1e-73	76.8	salivary allergen 2	1E-073	gi|7638032	280	195	264	69	74	61	0	66	11	1	2	N
cf-contig_52	9	salivary allergen 2	9	Contig-52	Contig52	86.3	.	67.6	794	N	9	P10-1189164_057_D07	794	814	645	AGVPSDCQNFKLVNITERMEKAFLNAHNRKRRLVAAGKGLLKDGVHTPIAAKMPNLTWNIALAKLAEYNVKQCGMKHDCAKTRHGHTGQNLFFYGTTLSPITNSTIAKMAVEGWYSESKDTRLEDIKKLTTIYPNGKPIGHYTQLIWGNTTKVGCAVSTYKKHSNGNMFNMTLVACNYRGGNMLEEAVYQIKDAKNPKSKNQTKNNKKPKQKMPK	2	Cyt		9	29	2	24	2	92	1	XC-contig_62	3e-18	salivary allergen 2	s/	NR	0	80.6	salivary allergen 2	1E-120	gi|7638032	434	212	264	97	81	6	0	52	8	1	2	N
cf-contig_54	3	salivary allergen 2	3	Contig-54	Contig54	73.8	.	72.7	333	N	3	P5-1188788_023_E03	357	352	189	PGTTKVGCAVSTYLKQGFNMTLVACNYRGGNMLEQPVYQIRNGTNPKTSNQNKKQPNKRIKRA	2	Cyt		3	30	2	99	1	94	1	XC-contig_62	2e-48	salivary allergen 2	s/	NR	2e-14	25	salivary allergen 2	2E-014	gi|7638032	82.8	65	264	62	25	25	6	199	8	1	2	N
Immunity related			8
Attacin
cf-contig_208	3	Attacin	3	Contig-208	Contig208	54.6	.	66.6	535	N	3	P1-1152500_011_C01	565	554	264	QPGFGTGPVTVGGGLQYSREGKGHVGVNAQHTLGFGTDVGANAGVNLFRANNGRTSLDADTFSSKHFVGAFGTGRTNYGGAVNFRHRF	3	Ind		3	171	1	173	1	171	1	XC-contig_2	6e-09	Attacin	s/	PFAM	3e-15	65.5	antibacterial peptide	3E-010	gi|269204398	69.3	83	138	38	61	52	1	55	66	1	3	N
Defensins
cf-contig_726	1	Defensin-1 - signalP detected	1	Contig-726	Contig726	66.	.	66	564	N	1	P10-1189178_071_E09	564	583	354	KTKMKYLTVVSLALVALFATVQSIPTGDFQLVEDELLGEPVEQLVDLDQGPYDNAGIRQKRVTCDLLSVSTPIDSLNHAACAAHCLSLRRGFRGGRCENGVCNCRKKIRIRYKKFVFI	3	SIG	3,	1	589	1	605	1	618	1	XC-contig_2	4e-05	Defensin-1 - signalP detected	s/imm Defensin-1	SWISSP	7e-09	108.4	Defensin precursor, putative	2E-015	gi|242014943	86.3	108	109	44	100	63	11	1	78	1	3	N
cf-contig_537	1	Knottins	1	Contig-537	Contig537	64.8	.	68.3	350	N	1	P2-1190471_018_H04	350	369	207	GFSELCYKGTGSTSRHYEMSQDKVTVEGFCKGNKGNTECNNHCKKYCKGKNGKCGGAGHQPTPTSCYCY	3	Cyt		1	439	1	449	1	455	1	XC-contig_25	0.24	Knottins	imm	SMART	3e-05	93.3	putative salivary protein	1E-005	gi|121511996	53.5	71	100	36	72	46	5	23	9	1	3	N
cf-contig_188	1	Knottins	1	Contig-188	Contig188	63.9	.	75.7	261	N	1	P16-1189920_033_H05	261	280	126	NNNYRKINKSINLKEYNLIIHILRSKCKMEFYNMLIYYYVNK	1	Ind		1	13	4	11	4	9	4	XC-contig_104	0.5	Knottins	imm	SMART	2e-05	62.2	defensin-like protein 3	0.22	gi|260765461	39.3	29	88	43	34	17	0	59	27	1	3	N
cf-contig_189	1	Knottins	1	Contig-189	Contig189	63.7	.	73.7	331	N	1	P4-1188719_036_G06	331	350	186	GRGTSEERMQGCKIRFNGVIEIMCRSYGSPSTLDMYCNKDCKKIGLPYGKCVTGNQCECYVK	1	Cyt		1	13	4	11	4	9	4	XC-contig_58	0.002	Knottins	imm	SMART	3e-05	62.2	predicted protein	0.13	gi|290983102	40	1435	5238	32	27	40	0	1255	7	2	1	N
cf-contig_190	1	Knottins	1	Contig-190	Contig190	46.7	.	72	277	N	1	P8-1189068_057_D07	277	296	150	GAGNRALRPGRVKYFRHVLQQGLQENWITIWKMCNWQPMRMLCEIIFKER	3	Ind		1	13	4	11	4	9	4	XC-contig_36	0.18	Knottins	imm	SMART	2e-05	62.2	defensin-like protein 3	0.078	gi|260765461	40.8	30	88	45	35	17	0	58	37	1	1	N
Flea -specific families
FS-H family			42
cf-contig_29	3	Unknown product	3	Contig-29	Contig29	75.	.	72.2	305	N	3	P2-1190450_053_F07	164	324	102	NFEVFNDPNMFCLQFILTANCWNLPYRNKMFKKY	3	Ind		3	1	14	2	9	21	2	XC-contig_237	0.086	Unknown product	s/				FS-H precursor	0.005	gi|1575479	44.7	20	98	80	21	4	0	78	4	1	1	N	5
cf-contig_37	1	secreted salivary protein	1	Contig-37	Contig37	62.4	0.2	70.4	427	N	1	P10-1189128_063_A07	427	446	201	PGYKRGVNTXLGSLLLKIFVLEIIKVAKYFAKVNVDLEVVLVETVVQHDQIKNTVIANNHIPDERPN	1	Ind		1	1	14	2	9	21	2	XC-contig_52	2e-07	secreted salivary protein	s/	NR	1e-09	56.3	FS-H precursor	7E-011	gi|1575479	70.9	55	98	51	57	27	3	43	30	1	3	N	1.818
cf-contig_31	9	secreted salivary protein	9	Contig-31	Contig31	96.2	.	72.4	558	N	9	P12-1189362_007_E01	582	580	159	AGTYILKDFCTGNHEDCNLFCMSQCRSGGGGCGNGGSTRPDPNHCYCNPPYSG	2	Ind		9	1	14	4	5	4	5	XC-contig_76	9e-39	secreted salivary protein	s/	NR	3e-14	56.3	FS-H precursor	2E-014	gi|1575479	83.2	55	98	58	57	23	3	43	2	1	2	N
cf-contig_39	1	secreted salivary protein	1	Contig-39	Contig39	65.4	.	72	567	N	1	P14-1189525_062_B08	567	586	162	TAGTYILKDFCTGNHEDCNLFCMSQCRSGGGGCGNGGSTRPDPNHCYCNPPYSG	2	Ind		1	1	14	4	5	4	5	XC-contig_76	2e-37	secreted salivary protein	s/	NR	3e-14	56.3	FS-H precursor	2E-014	gi|1575479	83.2	55	98	58	57	23	3	43	5	1	2	N
cf-contig_40	1	secreted salivary protein	1	Contig-40	Contig40	63.9	0.2	70.5	588	N	1	P19-1190204_001_H01	588	607	186	RGSEEVPIXTGKYILKDFCTGNHEDCNLFCMSQCRSGGGGCGNGGSTRPDPNHCYCNPPYSG	3	Ind		1	1	14	4	5	4	5	XC-contig_76	5e-32	secreted salivary protein	s/	NR	4e-15	64.8	FS-H precursor	4E-016	gi|1575479	89	64	98	55	66	29	3	34	3	1	3	N
cf-contig_41	1	secreted salivary protein	1	Contig-41	Contig41	64.6	.	70.8	598	N	1	P16-1189854_093_B11	598	617	198	GEENPSSEEVPIPPGQYILKDFCTGNHEDCNLFCMSQCRSGGGGCGNGGSTRPDPNHCYCNPPYSG	3	Ind		1	1	14	4	5	4	5	XC-contig_76	1e-59	secreted salivary protein	s/	NR	1e-15	70.2	FS-H precursor	9E-017	gi|1575479	91.3	68	98	56	70	30	3	30	3	1	3	N
cf-contig_38	1	Unknown product	1	Contig-38	Contig38	61.4	.	70.4	514	N	1	P18-1190052_043_C05	514	533	123	GRGIGHYGRDLEVEVVETVVQHALIQIIVIAIHHIPDERPD	3	Ind		1	1	14	4	5	4	5	XC-contig_60	0.16	Unknown product	s/				FS-H precursor	4E-006	gi|1575479	55.5	26	98	77	28	6	0	72	32	1	2	N
cf-contig_66	2	Unknown product	2	Contig-66	Contig66	82.	0.3	72.6	345	N	2	P7-1188978_007_E01	344	365	141	YHFFKKTQVNSNILMTTVDDSQYLVSLSYNLLVLINVAIFLFFLIVD	3	Ind		2	8	4	8	4	6	4	XC-contig_41	0.01	Unknown product	uk				FS-H precursor	1E-006	gi|1575479	56.6	22	98	95	23	1	0	76	6	1	3	N
cf-contig_69	1	Unknown product	1	Contig-69	Contig69	65.2	.	74.2	481	N	1	P11-1189299_068_G10	481	500	141	YHFFKKTQVNSNILMTTVDDSQYLVSLSYNLLVLINVAIFLFFLIVD	1	Ind		1	8	4	8	4	6	4	XC-contig_14	0.048	Unknown product	uk				FS-H precursor	0.015	gi|1575479	43.1	17	98	88	18	2	0	81	7	1	1	N
cf-contig_70	1	Unknown product	1	Contig-70	Contig70	64.	.	72.2	351	N	1	P19-1190134_029_B03	351	370	126	KRQVNSNISMTTVDDSQYLVSLSYNLLVLINVAIFLFFLIVD	1	Ind		1	8	4	8	4	6	4	XC-contig_57	2e-06	Unknown product	uk				FS-H precursor	3E-005	gi|1575479	52.4	26	98	74	28	7	0	72	15	1	3	N
cf-contig_71	1	Unknown product	1	Contig-71	Contig71	62.9	.	73.6	356	N	1	P20-1190263_090_D12	356	375	117	VNSNISMSTVGDSQNLVSLSYILLVLINVAIFLFFSIVD	1	Ind		1	8	4	8	4	6	4	XC-contig_60	0.028	Unknown product	uk				FS-H precursor	6E-007	gi|1575479	57.8	23	98	91	24	2	0	75	6	1	3	N
cf-contig_63	2	Unknown product	2	Contig-63	Contig63	66.9	.	76.3	370	N	2	P2-1190412_043_C05	370	389	93	FIKYYHFFKKKCKLIQTFQCRPSTIRRILFH	3	Ind		2	15	3	13	3	13	3	XC-contig_43	7e-05	Unknown product	uk				FS-H precursor	8E-004	gi|1575479	47.4	20	98	80	21	4	0	78	8	1	2	N
cf-contig_64	2	Unknown product	2	Contig-64	Contig64	74.	.	77.1		N	2	P15-1189794_087_E11	368	385	93	FIKYYHFFKKKCKLIQTFQCRPSTIRRILFH	3	Ind		2	15	3	13	3	13	3	XC-contig_95	2e-25	Unknown product	uk				FS-H precursor	8E-004	gi|1575479	47.4	20	98	80	21	4	0	78	8	1	2	N
cf-contig_67	1	secreted salivary protein	1	Contig-67	Contig67	60.3	.	72.7	424	N	1	P8-1189036_095_A11	424	443	132	GAGDRHYGRGMRDAGQETEDAETEELQDLILDIAIVMHHILDKI	3	Ind		1	15	3	13	3	13	3	XC-contig_95	3e-31	secreted salivary protein	s/	NR	1e-07	30.8	FS-H precursor	1E-009	gi|1575479	67	28	98	86	30	4	0	70	41	1	2	N
cf-contig_94	8	secreted salivary protein	8	Contig-94	Contig94	90.8	.	72.3	364	N	8	P4-1188687_074_D10	370	386	132	NCYKHWIDLFILPYDFILKLLPNNVNLILKTFCEISKMLLHNKF	1	Ind		8	38	2	31	2	29	2	XC-contig_169	7e-08	secreted salivary protein	s/	NR	4e-06	31.9	FS-H precursor	5E-009	gi|1575479	64.7	29	98	83	31	5	0	69	8	1	2	N
cf-contig_95	1	secreted salivary protein	1	Contig-95	Contig95	64.2	.	72.9	346	N	1	P18-1190030_063_A07	346	365	132	NCYKHWIDLFILPYDFILKLLPNNVNSILKTFCEISKMLLHNKF	3	Ind		1	38	2	31	2	29	2	XC-contig_169	5e-08	secreted salivary protein	s/				FS-H precursor	1E-005	gi|1575479	53.1	23	98	83	24	4	0	75	4	1	1	N
cf-contig_65	4	secreted salivary protein - signalP detected	4	Contig-65	Contig65	94.1	.	74.6	633	N	4	P9-1188499_008_E02	664	654	324	NKVKINSKLKMKFLFVFFTLCVLYQMVVADRMVSKTCQTGGNTRSEDRVSIKSGQHILQNYCQDGRNNQEKCDMFCMKECKSRSGGCGNGGSLRPDSRHCYCEAPYSG	2	SIG	2,	4	108	1	102	1	97	1	XC-contig_169	7e-15	secreted salivary protein - signalP detected	s/	NR	1e-23	104.2	FS-H precursor	2E-039	gi|1575479	166	97	98	73	100	26	0	1	68	1	2	N
cf-contig_68	1	Unknown product	1	Contig-68	Contig68	57.7	0.1	76.1	667	N	1	P16-1189906_019_G03	667	686	210	NLSNKKKLELLYINKCIISVINYGFEKNLEQRNTYNTILLDQYFEIFEDLEWIHLSENLYNKQDYKTVVI	1	Ind		1	109	1	103	1	98	1	XC-contig_51	3e-25	Unknown product	uk				FS-H precursor	8E-005	gi|1575479	52	23	98	83	24	4	0	75	6	1	3	N
cf-contig_724	1	secreted salivary protein	1	Contig-724	Contig724	59.1	.	69.6	441	N	1	P10-1189175_040_E06	441	460	240	TAGVVKVKVKLEYQYHLDHLLWKIFVMEERTVEIAFYFAWGLVEQEMVFVALVMAQDQIRNIVIVRHHIQDKIAKYILDN	1	Cyt		1	587	1	603	1	616	1	XC-contig_51	0.07	secreted salivary protein	s/	NR	6e-12	72.3	FS-H precursor	3E-016	gi|1575479	88.6	68	98	57	70	29	1	30	9	1	3	N
Short peptide family			116
cf-contig_19	1	secreted salivary protein	1	Contig-19	Contig19	65.2	.	73.9	338	N	1	P15-1189738_031_A03	338	357	180	VVCVNPIQLIVILRIAKINAELQNLPLNVAMEKLKHQTKILVIVTKSLNLNYSGLLDIQI	1	Cyt		1	3	9	3	6	3	5	XC-contig_209	0.001	secreted salivary protein	s/	NR	3e-05	71.6	putative secreted salivary protein	3E-005	gi|121511950	52	46	74	43	64	30	0	28	9	1	3	N
cf-contig_12	76	secreted salivary protein - signalP detected	76	Contig-12	Contig12	92.4	.	73.5	527	N	76	P2-1190461_036_G06	555	554	273	TFNLKFNFLIMKFWAILLIALVVVHCVFASGKQYSECSKKGGRHQISDLCKSGSTNCNNNYCKEKCRVENPKPKCGDGKSGTEDKNTCYCN	2	SIG	2,	76	3	9	3	6	3	5	XC-contig_69	0.001	secreted salivary protein - signalP detected	s/	NR	1e-12	109.4	putative secreted salivary protein	1E-012	gi|121511950	77	73	74	45	100	44	0	1	113	1	2	N
cf-contig_13	9	secreted salivary protein - signalP detected	9	Contig-13	Contig13	95.4	.	73.9	531	N	9	P4-1188688_089_D11	560	568	273	TFNLKFNFLIMKFWAILLIALVVVHCVFASGKQYSECSKKGGRHQISDLCKSGSTNCNNNYCKEKCRVENPKPKCGDGKSGTEDKNTCYCN	2	SIG	2,	9	3	9	3	6	3	5	XC-contig_1	0.015	secreted salivary protein - signalP detected	s/	NR	1e-12	109.4	putative secreted salivary protein	1E-012	gi|121511950	77	73	74	45	100	44	0	1	113	1	2	N
cf-contig_14	6	secreted salivary protein - signalP detected	6	Contig-14	Contig14	84.3	.	74.9	515	N	6	P2-1190405_078_B10	534	554	273	IFNLKFKFLIMKFWAILLIALVVVHCVFASGKKYGECTKKGGRHQISDMCKSGSTDCNTKNCEDKCRITKPTPKCGNGKAETPDKNTCYCN	3	SIG	3,	6	3	9	3	6	3	5	XC-contig_27	0.0001	secreted salivary protein - signalP detected	s/	NR	6e-13	109.4	putative secreted salivary protein	6E-013	gi|121511950	78.2	73	74	44	100	45	0	1	102	1	3	N
cf-contig_16	8	Unknown product	8	Contig-16	Contig16	94.2	.	71.1	270	N	8	P12-1189318_047_A05	294	291	180	VICVNPVQLIVILRIAKINAELQNLPLNVAMEKLKHQTKILVIVTKSLNLNYSGLLDIQI	2	Cyt		8	3	9	3	6	3	5	XC-contig_140	1.3	Unknown product	uk				putative secreted salivary protein	3E-004	gi|121511950	48.9	46	74	41	64	31	0	28	13	1	1	N
cf-contig_17	1	secreted salivary protein - signalP detected	1	Contig-17	Contig17	55.5	0.4	70.5	459	N	1	P1-1152527_024_E04	459	478	285	GGNSAXYGRDLNLNFLIMKFWAILLIALVAVHCVFAFGKKYSDCSKKDGRHQISDLCKSGPSNCNKQNCKDKCRVENPTPKCGDGTSDKNICYCN	3	SIG	3,	1	3	9	22	2	20	2	XC-contig_68	5e-14	secreted salivary protein - signalP detected	s/	NR	2e-13	105.4	putative secreted salivary protein	2E-013	gi|121511950	79.3	73	74	48	100	40	0	1	54	1	3	N
cf-contig_15	14	Unknown product	14	Contig-15	Contig15	92.2	.	73	338	N	14	P4-1188671_044_C06	367	374	168	GRERGLQKDGRHQISDLCKSGPSNCNKQNCKDKCRVENPTPKCGDGTSDKNICYCN	1	Ind		14	3	9	22	2	20	2	XC-contig_57	0.074	Unknown product	uk				putative secreted salivary protein	4E-004	gi|121511950	48.5	47	74	43	65	29	0	27	16	1	1	N
cf-contig_673	1	Unknown product	1	Contig-673	Contig673	64.8	.	69.8	306	N	1	P8-1189109_084_G12	306	325	207	VVCVKHHLIVMLRIVKINAELQNTTLDVVMEKLKHLIKPPVIATKLLNLFFSGFLTFKNGVMIKNLPTK	2	Cyt		1	3	9	562	1	574	1	XC-contig_43	0.0003	Unknown product	uk				putative secreted salivary protein	0.046	gi|121512000	41.6	51	80	40	65	31	7	27	55	1	1	N
Abundant very short peptide family			124
cf-contig_1	42	Hypothetical secreted protein precursor - signalP detected	42	Contig-1	Contig1	91.	.	71.6	260	N	42	CAFL_P1-017_H03	332	282	153	PGEKMNLKFLFSFVAFAIMAFSLGEVSGAKGKAKPKTGGGGGADIPDLDRR	2	SIG	2,	42	2	11	1	11	1	11	XC-contig_136	6e-24	Hypothetical secreted protein precursor - signalP detected	s/	Sigp			glycosyltransferase	4.2	gi|157693985	35	25	1204	50	2	13	0	470	1	1	-1	N
cf-contig_2	14	Hypothetical secreted protein precursor - signalP detected	14	Contig-2	Contig2	81.2	.	72.1	292	N	14	P12-1189375_006_F02	312	312	144	KMNLKFLFTFIAFAIMAFSLGEVSGAKGKAKPKSGGGGGADVPDLDRR	1	SIG	1,	14	2	11	1	11	1	11	XC-contig_136	3e-59	Hypothetical secreted protein precursor - signalP detected	s/	Sigp			actin associated protein Wsp1, putative	4.2	gi|121704024	35	24	642	64	4	9	0	168	111	1	-2	N
cf-contig_5	10	Hypothetical secreted protein precursor - signalP detected	10	Contig-5	Contig5	65.	.	75	329	N	10	P19-1190160_041_D05	361	352	174	KILINKNQRKKMNLKFLFSFVAFAIMAFSLGEVSAAKPKSKPKAGGGGGADIPDLDRR	1	SIG	1,	10	2	11	1	11	1	11	XC-contig_136	2e-47	Hypothetical secreted protein precursor - signalP detected	s/	Sigp			hypothetical protein PseP1_19907	3.3	gi|325001051	35.4	62	110	26	57	46	0	36	28	1	1	N	1.613
cf-contig_6	19	Hypothetical secreted protein precursor - signalP detected	19	Contig-6	Contig6	82.8	.	75.7	317	N	19	P12-1189315_016_A02	329	341	153	LKKKMNLKFLFSFVAFAMMAFSLGEVSGAKGKAKPKTGGGGGADIPDLDRR	1	SIG	1,	19	2	11	1	11	1	11	XC-contig_69	2e-07	Hypothetical secreted protein precursor - signalP detected	s/	Sigp			hypothetical protein pc0820	3.2	gi|46446454	35.4	51	358	32	15	44	3	292	112	1	-3	N	1.961
cf-contig_7	30	Hypothetical secreted protein precursor - signalP detected	30	Contig-7	Contig7	75.1	.	73	542	N	30	P13-1189460_023_E03	542	562	357	NSDSKSIKKSGAVSSNKSEIRKDSKKMDKINKIKSERNALNKDVIKKVIVELNEEEIKEIININKNKASENFKETVKNWFDMVMEEETSEAVSVNESQVFIQFCCICNNGFFFGRSFRG	3	SIG	1,	30	2	11	1	11	1	11	XC-contig_6	1e-05	Hypothetical secreted protein precursor - signalP detected	s/	Sigp			predicted protein	8E-008	gi|297832456	61.2	111	112	40	100	52	0	1	12	3	-3	Y	1.802
cf-contig_10	1	Hypothetical secreted protein precursor - signalP detected	1	Contig-10	Contig10	64.2	.	73.4	331	N	1	CAFL_P1-079_A09	331	350	150	RKKMNLKFLFCFVAFAIMAFSLGEVSGAKGKAKPKTGGGGGADIPDLDRR	1	SIG	1,	1	2	11	1	11	1	11	XC-contig_7	2e-05	Hypothetical secreted protein precursor - signalP detected	s/	Sigp			Wiskott-Aldrich syndrome protein	1.9	gi|307208674	36.2	47	467	36	10	35	0	388	57	1	-1	N
cf-contig_25	8	Hypothetical secreted protein precursor - signalP detected	8	Contig-25	Contig25	77.4	.	72	404	N	8	P4-1188721_052_G08	404	435	198	LIKTFIMNLTGFIKCVLLVIFVFLGFLTNGNHCQLSTIGLTTGLEQRVHNAGKPSSGGTGAYSPGK	2	SIG	2,	8	6	4	6	4	11	3	XC-contig_43	0.0001	Hypothetical secreted protein precursor - signalP detected	s/	Sigp			SJCHGC02650 protein	1.5	gi|76155301	36.6	48	161	30	30	37	0	48	237	1	-2	N	4.167
FS-I antigen			5
cf-contig_169	5	Salivary antigen 1	5	Contig-169	Contig169	86.3	.	70.9	527	N	5	P3-1188565_062_B08	527	546	279	AGDGDICYCSRPSNLGPDWKVSKECQDPTKQGSGLTEIVPYRQQLAIPNICKLADSDSDAKNKKCKEHCKQKCRGGDDAGCDGNFCYCRPPRN	2	Cyt		5	151	1	153	1	151	1	XC-contig_52	1e-111	Salivary antigen 1	s/	SWISSP	1e-38	51.1	FS-I	2E-037	gi|3805687	159	150	154	76	98	21	0	1	2	2	2	N
Deorphanized flea proteins			17
cf-contig_303	1	Hypothetical secreted protein precursor - signalP detected	1	Contig-303	Contig303	59.5	.	73.2	530	N	1	CAFL_P1-074_D10	530	549	408	VTTFVKMKLLIILSAFFLLACCKEKRSFKVSEFCLTGKGSTEKNIEKHDDVFETKAPDFCPDDDDDDDFPENDQKKVDNYNSMLHSECAKFCRKNCETLIGFCGHEDFKDDGYGDPNTCYCAFSSEHYELAENLKD	2	SIG	2,	1	244	1	249	1	248	1	XC-contig_169	5e-22	Hypothetical secreted protein precursor - signalP detected	s/	Sigp			aspn	0.001	gi|157676747	47.4	69	370	34	19	58	2	1	77	1	2	N
cf-contig_437	1	Unknown product	1	Contig-437	Contig437	64.	.	75	261	N	1	P17-1189966_025_D03	261	280	129	PGPIVMVKLVCVVNQVFQQVIQKLVIVRIGDRKILNFNIKIDI	2	Ind		1	77	2	69	2	367	1	XC-contig_169	3e-21	Unknown product	uk				putative secreted salivary protein	0.49	gi|121512000	38.1	26	80	51	34	13	0	54	7	1	1	N
cf-contig_75	14	secreted salivary protein	14	Contig-75	Contig75	87.4	.	73.6	354	N	14	P6-1188908_019_G03	354	386	216	AGGAVFGINKVVKGLLVLLRQIRATYKFQIFVKIMEILNVIIIAKMNVVPRKDFAVDKLQQKKICASVHIKK	1	Ind		14	111	1	105	1	100	1	XC-contig_169	5e-13	secreted salivary protein	s/	NR	9e-19	73.2	putative secreted salivary protein	9E-019	gi|121512004	97.1	62	86	66	73	21	1	23	24	1	3	N
cf-contig_638	1	Unknown product	1	Contig-638	Contig638	62.9	.	72.7	219	N	1	P7-1188958_043_C05	219	238	201	AGAGTKLYSQYCTKGSGSKNKDRNPQGEIIVKNFCTNNNKCQEHCKNECELNGGSCKNKDCHCKMPK	1	Ind		1	522	1	534	1	544	1	XC-contig_57	4e-11	Unknown product	uk				putative secreted salivary protein	0.016	gi|121511902	43.1	70	94	31	76	49	11	21	16	1	1	N
Other putative secreted peptides			24
cf-contig_55	1	Unknown product	1	Contig-55	Contig55	54.9	0.8	72.3	237	N	1	P4-1188669_028_C04	237	256	96	GVGQSALXGRANPKIKLRTTKNQNKKCQNRAS	3	Ind		1	106	1	100	1	95	1	XC-contig_169	4e-21	Unknown product	uk				salivary allergen 2	0.046	gi|7638032	41.6	17	264	100	7	0	0	247	35	1	2	N
cf-contig_83	9	Glycine-rich cell wall structural protein 1.8 - signalP detected	9	Contig-83	Contig83	89.	.	58.7	415	N	9	P6-1188924_049_H07	416	441	342	KNKAMVKVMVKLMAKVMVKVMEVVTVVVMVVMATVDMEVTIPIQNPVEVTITNLEELEVTIPMDLMMELIMDLQDLKQLPLRNKEIVAHNFANITNAYTKVFLPTCDKLCIVKA	3	SIG	3,3,3,3,	9	113	1	108	1	103	1	XC-contig_169	7e-09	Glycine-rich cell wall structural protein 1.8 - signalP detected	extmat	SWISSP	2e-13	19.7	GH24756	8E-018	gi|195047978	94	356	541	50	66	45	3	163	2	11	2	Y
cf-contig_514	1	Hypothetical secreted protein precursor - signalP detected	1	Contig-514	Contig514	64.8	.	71.1	424	N	1	P20-1190308_065_H09	424	443	147	MPIHHQTLLLPHKIALFYACLLAVKIVKISIYLPHDQFYFTYKQARMIT	1	BL	1,	1	419	1	428	1	433	1	XC-contig_169	7e-12	Hypothetical secreted protein precursor - signalP detected	s/	Sigp			hypothetical protein FNFX1_1461	7.3	gi|332678718	34.3	104	332	26	32	81	2	90	66	1	3	N	1.923
cf-contig_802	1	Hypothetical secreted protein precursor - signalP detected	1	Contig-802	Contig802	62.2	.	78.2	462	N	1	P12-1189376_021_F03	462	481	225	NKLSSIKMNFKFIFFFTTFLVLMFFSLTNAKCSNSNSKRPTIDGKEGDGPTVRLFKGNEGTFDMEQIPENYEDLD	2	SIG	2,	1	645	1	667	1	683	1	XC-contig_80	4e-07	Hypothetical secreted protein precursor - signalP detected	s/	Sigp			hypothetical protein IMG5_126840	0.026	gi|340504173	42.4	87	514	32	17	63	3	160	186	1	-3	N	2.299
cf-contig_230	1	Hypothetical secreted protein precursor - signalP detected	1	Contig-230	Contig230	62.6	.	82.5	261	N	1	P2-1190419_092_C12	261	280	219	KWFWIKYFLSMIIILLLLLSSFIYIFLIINSELIYSKITHEKMDFIYNDKQNLNLLLKKIFSFNIHYKIVLLN	3	SIG	3,	1	56	2	49	2	46	2	XC-contig_169	5e-07	Hypothetical secreted protein precursor - signalP detected	s/	Sigp			hypothetical protein RUMTOR_00075	1.9	gi|153813869	36.2	58	166	35	36	38	1	42	42	1	3	N
cf-contig_277	1	Hypothetical secreted protein precursor - signalP detected	1	Contig-277	Contig277	65.6	.	71.2	456	N	1	CAFM_P2-085_F11	456	475	345	IKFISLVNMWYIISLILFLISNAELRPLEDNDIYHAKDINEILRVLDPSCHNEILRHQDVTSGLFQCHITCYRQGNGACRNVCQCTWENKILDPNSNTINNQVPGSTKHEKKKKK	2	SIG	2,	1	221	1	226	1	225	1	XC-contig_2	4e-10	Hypothetical secreted protein precursor - signalP detected	s/	Sigp			predicted protein	4.2	gi|290998914	35	100	756	25	13	81	10	243	158	1	2	N
cf-contig_760	1	Hypothetical secreted protein precursor - signalP detected	1	Contig-760	Contig760	48.5	.	76.6	1118	N	1	P11-1189296_051_G07	1118	1137	174	YYVKVMVVYIHIYSSLFYMALLLNISLYIFFGLNSYYKCNISKNFQSYLLINIIQEQC	2	BL	2,	1	611	1	631	1	646	1	XC-contig_169	4e-07	Hypothetical secreted protein precursor - signalP detected	s/	Sigp			NADH dehydrogenase subunit 5	0.52	gi|300124230	35.8	151	517	24	29	68	11	222	288	2	3	Y	1.325
cf-contig_120	7	Hypothetical secreted protein precursor - signalP detected	7	Contig-120	Contig120	84.8	.	75.1	414	N	7	P16-1189880_007_E01	436	434	207	LLKMNSKMLFVCLVATILIFGFEEVAAGKDKTTGGNGKSTGSKIAEQAKNTVKKAAGAVSDFAEGFAGA	1	SIG	1,1,	7	129	1	124	1	121	1	XC-contig_52	2e-24	Hypothetical secreted protein precursor - signalP detected	s/	Sigp			nucleolar protein, putative	2.5	gi|294951822	35.8	36	756	45	5	20	0	713	139	1	1	N
cf-contig_564	1	Hypothetical secreted protein precursor - signalP detected	1	Contig-564	Contig564	61.8	0.3	73.3	710	N	1	P3-1188634_033_H05	710	729	156	LTLYTITYKLYMYLYVLHYIFQLILLQEFLKAMCITSSLFSTFCLGVSRCVH	1	SIG	1,	1	460	1	470	1	477	1	XC-contig_40	0.01	Hypothetical secreted protein precursor - signalP detected	s/	Sigp			SecY	2.9	gi|348015370	37	178	247	22	72	159	2	61	45	1	3	N	3.933
cf-contig_792	1	Hypothetical secreted protein precursor - signalP detected	1	Contig-792	Contig792	62.6	0.5	77.2	389	N	1	P12-1189342_043_C05	389	408	192	SMKENMFLRPVENQIKKMTRLIIPFILILDFLEFFDSFILTYVLILFNYYYKVHIQTYLTVKPY	3	BL	3,3,	1	636	1	657	1	673	1	XC-contig_34	0.04	Hypothetical secreted protein precursor - signalP detected	s/	Sigp			hypothetical protein SUN_2147	1.1	gi|152993723	37	54	628	32	9	37	0	182	135	1	3	N	1.852
Putative Housekeeping proteins
Cytoskeletal
cf-contig_310	1	14-3-3zeta - protein heterodimerization - protein homodimerization - microtubule associated complex - protein folding - protein stabilization -	1	Contig-310	Contig310	65.2	.	56.4	263	N	1	CAFL_P1-087_E11	263	282	183	FRAIKLCQISNLPCQKGHIDYLKSLALTRTAPLCLRSTRKNWCNEPNWQSRPKDTMIWLRR	3	Cyt		1	251	1	256	1	255	1	XC-contig_170	0.073	14-3-3zeta - protein heterodimerization - protein homodimerization - microtubule associated complex - protein folding - protein stabilization -	cs	GO	6e-13	16.1	6-phosphofructokinase-like isoform 1	2E-011	gi|350423386	72.8	37	991	97	4	1	0	2	149	1	2	N
cf-contig_755	1	Actin	1	Contig-755	Contig755	65.5	.	64.8	538	N	1	P11-1189286_069_F09	538	557	237	ITAGGGTTMYPGIADRMQKEITALAPSTMKIKIIAPPERKYSVWIGGSILASLSTFQQMWISKQEYDESGPSIVHRKCF	1	Cyt		1	607	1	627	1	641	1	XC-contig_150	0.047	Actin	cs	KOG	9e-39	20.1	actin 2	1E-036	gi|312087163	156	78	186	94	42	4	0	108	1	1	1	N
cf-contig_798	1	Actin regulatory (gelsolin/villin family)	1	Contig-798	Contig798	38.8	0.1	63.1	1121	N	1	P12-1189359_074_D10	1121	1140	558	RGFXKGASDDEKEMARYVASRVGGGVIEVIEEGSETQEFWELLGGKSSYNTEIDPPGAPIIDPRLFHCRILSNGRLRVEEVDDYDQSDLDGDDVMILDAGDEIYIWIGSRTTEEEKERSIAMAKKYLKTDPTERTQENTCLVTVHQGSEPKNFKTLFEDWNNNLWDSQPSFEEIKQEIYEANHLLE	3	Cyt		1	641	1	663	1	679	1	XC-contig_26	0.001	Actin regulatory (gelsolin/villin family)	cs	KOG	1e-48	21.1	Gelsolin precursor	3E-051	gi|157112188	207	628	749	53	84	83	1	117	15	4	3	N
cf-contig_607	1	Calmodulin - lateral inhibition - calmodulin binding - centriole replication - microtubule associated complex - kinetochore organization - positive	1	Contig-607	Contig607	60.6	.	67.3	765	N	1	P5-1188808_085_F11	765	784	315	GEAELQDMINEVDADGNGTIDFPEFLTMMARKMKDTDSEEEIREAFRVFDKDGNGFISAAELRHVMTNLGEKLTDEEVDEMIREADIDGDGQVNYEEFVTMMTSK	3	Cyt		1	89	2	82	2	74	2	XC-contig_4	0.64	Calmodulin - lateral inhibition - calmodulin binding - centriole replication - microtubule associated complex - kinetochore organization - positive	cs	GO	2e-53	69	calmodulin A	5E-052	gi|339892262	209	148	149	100	100	0	0	1	6	2	3	N
cf-contig_685	1	Calmodulin - lateral inhibition - calmodulin binding - centriole replication - microtubule associated complex - kinetochore organization - positive	1	Contig-685	Contig685	64.4	.	65.3	307	N	1	P9-1188470_077_B09	307	326	207	GRGEEVREAFRVFDRAGNGIISAAELRHIMTNLGEKLTQEEVDEMIREADIDGDGQINYEEFVTMMMAK	1	Ind		1	558	1	573	1	585	1	XC-contig_123	1.5	Calmodulin - lateral inhibition - calmodulin binding - centriole replication - microtubule associated complex - kinetochore organization - positive	cs	GO	2e-27	44	Calmodulin; Short=CaM gi|11121264|emb|CAC14791.1| calmodulin	2E-026	gi|49035754	122	137	149	87	93	8	0	12	10	2	1	N
cf-contig_750	1	Calmodulin - lateral inhibition - calmodulin binding - centriole replication - microtubule associated complex - kinetochore organization - positive	1	Contig-750	Contig750	65.	.	68.8	653	N	1	P11-1189270_039_E05	653	672	207	GRGGRIREAFRVFDKDGNGFISAAELRHVMTNLGEKLTDEEVDEMIREADIDGDGQVNYEEFVTMMTSK	1	Ind		1	89	2	82	2	74	2	XC-contig_22	0.74	Calmodulin - lateral inhibition - calmodulin binding - centriole replication - microtubule associated complex - kinetochore organization - positive	cs	GO	8e-30	42.9	calmodulin A	2E-028	gi|339892262	130	135	149	100	91	0	0	14	16	2	1	N
cf-contig_761	1	centromere/microtubule binding protein cbf5 Aedes aegypti	1	Contig-761	Contig761	62.9	0.1	66.7	681	N	1	P11-1189297_052_G08	681	700	369	GRXEIDKHGKPNENTPKEWLTGYVDYSIKKEPGDEQEASQSATNGSEEPTKKRKLSSGDASGSGEAMDVSTSEKKKKKKKKRDEDPPTEPAAEEAAAEEEATEAPVEKKKKKKKDEKPKEESD	3	Cyt		1	84	2	76	2	69	2	XC-contig_206	3e-05	centromere/microtubule binding protein cbf5 Aedes aegypti	cs	NR	5e-21	24	centromere/microtubule binding protein cbf5	5E-021	gi|157136797	105	126	527	46	24	68	7	401	12	1	3	N
cf-contig_117	1	Elongation factor 1alpha48D - microtubule associated complex - lipid particle - GTP binding - translation - GTPase - cytoplasm	1	Contig-117	Contig117	67.6	.	63.9	432	N	1	P19-1190194_019_G03	432	451	195	GHQGCRKSHQGKEVARSTDLLTADVQHCNETLLPSQSVSKKKGLIHSFTICFLTQLYILYDYFIE	1	Ind		1	10	4	9	4	7	4	XC-contig_120	2e-43	Elongation factor 1alpha48D - microtubule associated complex - lipid particle - GTP binding - translation - GTPase - cytoplasm	cs	GO	4e-19	10.1	elongation factor-1 alpha	5E-018	gi|300952938	94.7	46	463	100	10	0	0	417	2	1	2	N
cf-contig_225	3	ERp60 - microtubule associated complex - lipid particle - protein disulfide oxidoreductase - electron carrier - cell redox homeostasis -	3	Contig-225	Contig225	89.6	.	70.5	265	N	3	P7-1188947_046_B06	273	285	213	MTLLNTLPNIPQKSLRAMIALEKLERLSCNAFINIYRFLRMWPRSMLIYLLISSDHICNVIKCHRMIEFFI	3	Cyt		3	181	1	184	1	182	1	XC-contig_33	0.26	ERp60 - microtubule associated complex - lipid particle - protein disulfide oxidoreductase - electron carrier - cell redox homeostasis -	cs	GO	3e-09	6.9	hypothetical protein AND_13790	5E-009	gi|312375720	64.7	33	487	85	7	5	0	454	2	1	2	N
cf-contig_451	1	F-actin capping protein beta subunit	1	Contig-451	Contig451	54.1	0.1	59.1	947	N	1	P18-1190041_046_B06	947	966	801	PXLDLMRRLPPQQIEKNLSDLIDLVPALCEDLLSSVDQPLKIVKDSSADKDYLLCDYNRDGDSYRSPWSNTYFPPLEGGSMPSERIRKIEIDANYAFDQYREMYFEGGVSSVYLWDLDHGFAGVILIKKAGDGSKKIKGCWDSIHVVEVLEKSRTAHYKLTSTVMLWLQTNKQGSGTMNLGGSLTRQVEQDSSFNETTNPHIANVGRMVEDMENKIRNTLNEIYFGKTKDIVNGLRSIQPLSDQKQQSALKQDLYAALQKRNAKGDN	2	Cyt		1	365	1	374	1	379	1	XC-contig_116	0.17	F-actin capping protein beta subunit	cs	KOG	0	95.6	F-actin-capping protein subunit beta-like	1E-129	gi|345498356	467	261	273	87	96	33	2	10	8	1	2	N
cf-contig_626	1	Microtubule-associated protein CRIPT	1	Contig-626	Contig626	63.2	.	66.7	506	N	1	P6-1188899_038_F06	506	525	285	MREELGKVITPDPWKSGARNTVESGGRKVGENKAVTGSKARFSPYTTTLLTCRICRQKVHQVGSHYCQSCAYKKGICAMCGKKLLDTKNYRQSST	2	Cyt		1	511	1	523	1	533	1	XC-contig_52	0.083	Microtubule-associated protein CRIPT	cs	KOG	2e-41	93	cysteine-rich PDZ-binding protein	5E-042	gi|110771988	174	92	100	83	93	15	0	8	47	1	2	N
cf-contig_576	1	Receptor of activated protein kinase C 1 - catalytic step 2 spliceosome - nuclear mRNA splicing via spliceosome - precatalytic spliceosome -	1	Contig-576	Contig576	48.1	.	64.4	144	N	1	P4-1188696_055_E07	144	163	141	RPGHVFPLLGLLMVKHCSLAILTILSEYGRCLSLLVKNVKIFLTIKV	2	Ind		1	469	1	479	1	488	1	XC-contig_183	1e-18	Receptor of activated protein kinase C 1 - catalytic step 2 spliceosome - nuclear mRNA splicing via spliceosome - precatalytic spliceosome -	cs	GO	1e-11	9.7	receptor for activated protein kinase C	2E-010	gi|237770133	69.3	31	319	96	10	1	0	288	13	1	1	N
cf-contig_288	1	Thioredoxin domain-containing protein 2 - nutrient reservoir - cell redox homeostasis - cell differentiation - protein disulfide oxidoreductase -	1	Contig-288	Contig288	34.6	.	54.1	1054	N	1	CAFL_P1-029_B03	1054	1073	657	CPLKLGRLSNISTIFDLKAISRGQSNNGYEPAERPKAKKPKDNLQPEGDFERPEQEKFKPTERPQAKKPKDNLHPEGDFERPEQEKFKPAERPKAKKPKDNLQPEGNFERPEQEKFKPAERPKAKKPKDNLQPEGYFERPEQEKFRPAERPTAKKPKDNLQPEGSFERPEQLKFVPAEVRTPIKHFDNLRPEGSFERPEPEQYTPAERRKAENHQITCN	1	Cyt		1	231	1	236	1	235	1	XC-contig_170	0.014	Thioredoxin domain-containing protein 2 - nutrient reservoir - cell redox homeostasis - cell differentiation - protein disulfide oxidoreductase -	cs	GO	9e-15	32.1	similar to AGAP009638-PA	1E-102	gi|189238710	264	2413	3589	67	67	59	0	0	0	153	1	Y
cf-contig_426	1	Uncharacterized protein - smooth muscle cell proliferation - plasma membrane - cytoplasm - nucleus	1	Contig-426	Contig426	64.1	.	66.9	232	N	1	P17-1189934_063_A07	232	251	159	AITTPDNEVTDILKVAKTNFIVAKLLADGHKRDKNPPEFDFSMHRHLPIIKLI	2	Ind		1	347	1	356	1	359	1	XC-contig_214	0.21	Uncharacterized protein - smooth muscle cell proliferation - plasma membrane - cytoplasm - nucleus	cs	GO	1e-12	7.8	N-alpha-acetyltransferase 35, NatC auxiliary subunit-like	2E-012	gi|350411194	76.3	47	728	72	7	13	1	681	20	1	2	N
Extracellular matrix
cf-contig_134	3	integrin beta-like 1 - integrin-mediated signaling pathway - binding - cell-matrix adhesion - receptor - integrin complex - cell adhesion - signalP detected	3	Contig-134	Contig134	77.5	.	63.5	668	N	3	P15-1189763_028_C04	666	687	204	RPGYLRKIDVCVCGCVCVYVCVCVCVYVCMCVYVCADTNFRRRFREHGSTDLNNSKNIRFVLLRRRAD	3	SIG	1,2,	3	11	4	10	4	8	4	XC-contig_110	2e-08	integrin beta-like 1 - integrin-mediated signaling pathway - binding - cell-matrix adhesion - receptor - integrin complex - cell adhesion - signalP detected	extmat	GO	3e-10	8.4	galactosidase	8E-010	gi|326431879	68.6	68	417	75	17	8	0	215	14	19	-1	Y
Immunity related
cf-contig_622	1	Lin-9 homolog (mLin-9) (Type I interferon receptor beta chain-associated protein) (TUDOR gene similar 1 protein)	1	Contig-622	Contig622	61.6	.	71	409	N	1	P6-1188875_042_D06	409	428	237	KAIITNKKYLNVITDLTALMMQIRCLSESEQSPSELQYLKGTVDEIKSRISSANKATFRNCIEVHLRHIEEGLRSGFNN	3	Cyt		1	508	1	520	1	530	1	XC-contig_57	0.005	Lin-9 homolog (mLin-9) (Type I interferon receptor beta chain-associated protein) (TUDOR gene similar 1 protein)	imm	NR	3e-13	12.7	hypothetical protein TcasGA2_TC008121	3E-013	gi|270005986	78.6	75	579	44	13	42	0	488	33	1	3	N	1.333
cf-contig_697	1	GRIM-19 protein	1	Contig-697	Contig697	64.1	.	58.7	364	N	1	P9-1188511_006_F02	364	383	273	RKLEMRSGRIALHPLLLAERDREYLKQIRRNRDEEARLMANVKGWEVGKLYNEPVYKTVPKDQFVQPSFTEFYIHADYAAKADRNDLQFWH	1	Cyt		1	568	1	583	1	595	1	XC-contig_190	0.38	GRIM-19 protein	imm	PFAM	8e-28	59.2	AGAP009652-PA	3E-028	gi|31232346	128	86	153	65	57	30	0	64	19	1	1	N
cf-contig_242	2	Polyubiquitin-B - toll-like receptor 21 signaling pathway - toll-like receptor 15 signaling pathway - activation of MAPK involved in innate immune	2	Contig-242	Contig242	79.6	0.3	67	757	N	2	P5-1188792_055_E07	757	776	645	PXGGPSDTIENVKAKIQDKEGIPPDQQRLIFAGKQLEDGRTLSDYNIQKESTLHLVLRLRGGMQIFVKTLTGKTITLEVEPSDTIENVKAKIQDKEGIPPDQQRLIFAGKQLEDGRTLSDYNIQKESTLHLVLRLRGGMQIFVKTLTGKTITLEVEPSDTIENVKAKIQDKEGIPPDQQRLIFAGKQLEDGRTLSDYNIQKESTLHLVLRLRGGF	3	Cyt		2	191	1	194	1	192	1	XC-contig_102	9e-46	Polyubiquitin-B - toll-like receptor 21 signaling pathway - toll-like receptor 15 signaling pathway - activation of MAPK involved in innate immune	imm	GO	0	69.1	polyubiquitin-like	1E-113	gi|340374850	414	380	381	100	100	0	0	1	15	4	3	N
Metabolism, amino acid
cf-contig_371	1	Glycine dehydrogenase (decarboxylating)	1	Contig-371	Contig371	65.7	.	69.1	537	N	1	P14-1189587_068_G10	537	556	294	AGGELDRFCEALILIRKEIALIEEGKLDRQNNPLKLSPHTQRQVTMENWTRKYSREMAAFPAPFVNPETKIWPTVARIDDIYGDKNLVCTCPPMSSYT	2	Cyt		1	300	1	307	1	308	1	XC-contig_176	1.1	Glycine dehydrogenase (decarboxylating)	met/aa	KOG	1e-39	9.3	glycine dehydrogenase	2E-034	gi|45383510	149	94	1004	70	9	28	0	898	8	1	2	N
cf-contig_664	1	Homocysteine S-methyltransferase	1	Contig-664	Contig664	63.3	.	69.7	308	N	1	P8-1189072_089_D11	308	327	165	GRGKDKDRCVPVQDYVSSWLDSGATFIGGCCRTDDEDIRSIRKSVIRWINKRELN	1	Ind		1	543	1	555	1	567	1	XC-contig_166	0.25	Homocysteine S-methyltransferase	met/aa	KOG	9e-08	13.2	similar to homocysteine S-methyltransferase isoform 1	6E-008	gi|91083213	61.2	48	348	48	14	25	0	288	13	1	1	N
cf-contig_623	1	Phosphoserine phosphatase	1	Contig-623	Contig623	64.4	.	71.7	678	N	1	P6-1188890_071_E09	678	697	201	IPFTHMYINTYMYVHGAETAYSKKILLSLKLLTGNFTESLFYVTGYYFAIGCRSKTIKINFYKKKKK	3	Cyt		1	509	1	521	1	531	1	XC-contig_16	0.22	Phosphoserine phosphatase	met/aa	KOG	1e-12	22.9	phosphoserine phosphatase	1E-010	gi|284413682	71.2	49	237	68	21	16	2	170	30	1	3	N
cf-contig_501	1	Spermidine synthase	1	Contig-501	Contig501	65.2	.	71.3	487	N	1	P20-1190242_027_C03	487	506	240	PGQEKFPKVGYCTISVPTYPSGQIGFVVGALDKNCDLSTPNLKFTEEECDKLQLRYYSSDIHKASFTLPRFVKKELMSVL	3	Ind		1	409	1	418	1	423	1	XC-contig_141	0.15	Spermidine synthase	met/aa	KOG	1e-16	24.3	GI23961	1E-016	gi|195107677	89.7	68	289	57	24	29	0	217	18	1	3	N
cf-contig_378	1	Trypsin	1	Contig-378	Contig378	67.3	.	70.3	331	N	1	P15-1189741_048_A06	331	350	120	ICRPVVLCGSCFLRTQKNWQCRYSRCLYEGVRLPGFRVYD	2	Ind		1	307	1	314	1	315	1	XC-contig_176	0.07	Trypsin	met/aa	KOG	9e-09	17.9	AGAP003246-PA	4E-007	gi|118783391	58.5	43	355	63	12	17	0	305	3	1	3	N	2.326
cf-contig_524	1	Uncharacterized conserved protein with similarity to phosphopantothenoylcysteine synthetase/decarboxylase	1	Contig-524	Contig524	63.3	.	67	644	N	1	P2-1190429_074_D10	644	663	474	GGLESGITAGAACECLAPCGNRAVLYLAAAVSDFYIPSDKMPTHKIQSGGGAPTISLQLVPKMLEPLVSLWVPHAFVVSFKLETDESLLISKSRESLRKYKHKLVIANILQTRKHRVVFVTKDSNYEVLLTREQILSGLEIENVIVADVVQQHYNFIL	2	Cyt		1	428	1	437	1	442	1	XC-contig_147	0.21	Uncharacterized conserved protein with similarity to phosphopantothenoylcysteine synthetase/decarboxylase	met/aa	KOG	2e-56	48.6	AGAP004311-PA	2E-059	gi|158292018	233	146	316	79	47	30	0	161	32	1	2	N
Metabolism, carbohydrate
cf-contig_455	1	6-phosphogluconolactonase - 6-phosphogluconolactonase - glucose metabolic process - carbohydrate metabolic process - cytoplasm	1	Contig-455	Contig455	48.	.	48		N	1	P18-1190059_092_C12		1025	366	ATPECRQSHHRFPQSLFLNAFALIEFFKAVLRLIFCPNVAELRPFTIQDESARYWSRRLSWLSSLIGYGLIVAVPIISNQVNVQIGALANVIIMLCMTVWALYLIFRNKKEIIQQQNAFLPC	2	Cyt		1	369	1	378	1	383	1	XC-contig_252	2.2	6-phosphogluconolactonase - 6-phosphogluconolactonase - glucose metabolic process - carbohydrate metabolic process - cytoplasm	met/carb	GO	2e-83	46.5	6-phosphogluconolactonase	5E-086	gi|170769005	301	226	331	92	69	12	0	105	497	3	-2	Y
cf-contig_440	1	ATP citrate lyase - lipid particle - cellular carbohydrate metabolic process - succinate-CoA ligase (ADP-forming) - ATP binding - acetyl-CoA	1	Contig-440	Contig440	64.3	.	75.4	331	N	1	P17-1189989_006_F02	331	350	141	GYLDVVLVLLGITWIKNDLNKAYIVILGMISHMYCLNNIIINFYFKS	3	Ind		1	356	1	365	1	370	1	XC-contig_67	1.2	ATP citrate lyase - lipid particle - cellular carbohydrate metabolic process - succinate-CoA ligase (ADP-forming) - ATP binding - acetyl-CoA	met/carb	GO	7e-17	3.5	hypothetical protein TcasGA2_TC015096	9E-016	gi|270008566	87	39	1089	95	4	2	0	1050	5	1	2	N
cf-contig_222	1	Fructose-biphosphate aldolase	1	Contig-222	Contig222	57.8	.	60.4	819	N	1	P15-1189821_002_H02	819	838	603	GRGTANVLARYASICQSQRLVPIVEPEVLPDGDHDLERAQKVTETVLAAVYKALNDHHVYLEGTLLKPNMVTAGQSCPQKPTPASVGVATVTALRRTVPASVPGITFLSGGQSEEEASVHLNAVNQVELLKPWALTFSFGRALQASVLKAWQGKNENVAKAQAELLNRAKANGLACQGLYQAGSIQSGAGGKSNFVKAHAY	1	Cyt		1	54	2	47	2	44	2	XC-contig_57	0.5	Fructose-biphosphate aldolase	met/carb	KOG	1e-88	54.2	fructose-bisphosphate aldolase	4E-084	gi|157111184	315	196	364	79	54	41	0	168	13	1	1	N
cf-contig_223	1	Fructose-biphosphate aldolase	1	Contig-223	Contig223	65.9	.	63.5	548	N	1	P17-1189991_022_F04	548	567	267	SEEEASVHLNAVNQVELLKPWALTFSFGRALQASVLKAWQGKNENVAKAQAELLNRAKANGLACQGLYQAGSIQSGAGGKSNFVKAHAY	2	Cyt		1	54	2	47	2	44	2	XC-contig_57	0.32	Fructose-biphosphate aldolase	met/carb	KOG	1e-37	28.9	fructose-bisphosphate aldolase	4E-036	gi|157111184	155	104	364	74	29	27	0	260	14	1	2	N	0.962
cf-contig_449	1	glucosamine-6-phosphate deaminase 1 - cellular_component - carbohydrate metabolic process - N-acetylglucosamine metabolic process -	1	Contig-449	Contig449	28.1	.	67.8	376	N	1	P18-1190038_029_B03	376	395	120	YSEQAHIKTIALYKVVEEWVSHIVDCFCISTTSTRINDLR	2	Ind		1	79	2	71	2	65	2	XC-contig_5	0.29	glucosamine-6-phosphate deaminase 1 - cellular_component - carbohydrate metabolic process - N-acetylglucosamine metabolic process -	met/carb	GO	3e-07	17	glucosamine-6-phosphate isomerase-like isoform 1	4E-009	gi|156552402	55.8	74	281	61	27	18	0	195	7	3	3	Y	2.703
cf-contig_668	1	Glucosamine-6-phosphate isomerase	1	Contig-668	Contig668	65.2	.	66.7	410	N	1	P8-1189085_088_E12	410	429	285	GRGSKRALTVGVGTVMDAREVMILITGSHKAFALYKAIEEGVNHMWTVSAFQQHPHTLMICDEDATLELRVKTVKYFKALSAVHYKLIGEDFPAC	1	Cyt		1	79	2	71	2	65	2	XC-contig_52	0.12	Glucosamine-6-phosphate isomerase	met/carb	KOG	1e-40	30	glucosamine-6-phosphate isomerase-like isoform 1	6E-039	gi|156552402	164	86	281	91	31	7	0	183	13	1	1	N
cf-contig_547	1	Ricin-type beta-trefoil	1	Contig-547	Contig547	61.3	.	71.2	196	N	1	P3-1188579_076_C10	196	215	150	GREYTKDKQIRNIASNLCLDAGRLKSQDFVYAAKCTDSKTQKWVFELTTL	1	Ind		1	449	1	459	1	465	1	XC-contig_131	0.62	Ricin-type beta-trefoil	met/carb	SMART	4e-07	37.2	hypothetical protein AND_01449	0.020	gi|312384870	42.7	44	195	42	23	26	1	149	7	1	1	N
Metabolism, energy
cf-contig_387	1	Cytochrome c oxidase subunit II	1	Contig-387	Contig387	64.7	.	75.5	426	N	1	P15-1189769_076_C10	426	445	174	TIPSLGIKIDATPGRLNQSNFIINRPGLYFGQCSEICGANHRFIPIVIERILINSFIK	2	Ind		1	315	1	323	1	324	1	XC-contig_123	2e-72	Cytochrome c oxidase subunit II	met/energy	KOG	1e-56	60.1	cytochrome oxidase subunit II	2E-063	gi|343409604	245	135	227	91	60	12	0	91	17	1	2	N	2.963
cf-contig_764	1	cytochrome c oxidase subunit Vb COX4	1	Contig-764	Contig764	63.	0.4	62.5	499	N	1	P13-1189410_015_A01	499	518	381	GGLGNXXITAGMSVARYCKMMPDIIEHATGIEKRELQAIAAGNEDPFDMKVIKRNAGTQQEPNLIPSAFESRIVGCICEEDATAVKWMWLHQNSPRRCECGHWFKLVQKHLFNNVMHGLVFILRMMK	1	Cyt		1	613	1	634	1	649	1	XC-contig_234	0.25	cytochrome c oxidase subunit Vb COX4	met/energy	NR	1e-38	78.3	cytochrome c oxidase subunit Vb COX4	1E-038	gi|289740249	162	93	120	76	78	22	0	24	46	1	1	N
cf-contig_527	1	Cytochrome c1	1	Contig-527	Contig527	52.9	.	70	387	N	1	P2-1190432_007_E01	387	406	189	IIICSWIFCASMIVTISIKIVFGHTWYSIILSLVDNQYTFFFFVFYGKAKKTKFFFLNFHLYF	3	Cyt		1	431	1	440	1	445	1	XC-contig_154	0.061	Cytochrome c1	met/energy	KOG	2e-16	16	cytochrome c1	5E-014	gi|163838694	81.3	52	308	67	17	17	0	256	5	1	2	N
cf-contig_490	1	Electron transfer flavoprotein beta subunit - signalP detected	1	Contig-490	Contig490	54.4	0.2	63.2	893	N	1	P19-1190199_052_G08	893	912	756	GGASGITAGVIDYAVKIRVKPDKKGVVTDGVKHSMNPFDEIAVEEAVRMKEKKLASEIVAVSCGPTQAQEVLRTALAMGVDRAIHVEVPPAEYETLQPIHVSKILAKIAEEEKVDFIILGKQAIDDDANQTAQMTAALLDWPQATFASKIEREGDKLKVTREIDGGLEVVECKIPTVISADLRLNEPRYATLPNIMKAKKKPLKKVAAKDLGVDLSPRIEVISVEDPPTRQGGTIVPDVDTLIAKLKEKGHI	3	Cyt		1	398	1	407	1	412	1	XC-contig_224	0.55	Electron transfer flavoprotein beta subunit - signalP detected	met/energy	KOG	0	96	electron-transfer-flavoprotein beta polypeptide	1E-112	gi|114053151	408	242	253	82	96	43	0	11	30	1	3	N
cf-contig_520	1	F0F1-type ATP synthase beta subunit	1	Contig-520	Contig520	65.4	.	66.8	475	N	1	P2-1190413_044_C06	475	494	324	GGVQKILQDYKSLQDIIAILGMDELSEEDKLTVARARKIQRFLSQPFQVAEVFTGHAGKLVPLEETIKGFTKILAGEYDHLPEVAFYMVGPIEEVVQKAEKLAKEASN	1	Cyt		1	425	1	434	1	439	1	XC-contig_46	0.98	F0F1-type ATP synthase beta subunit	met/energy	KOG	1e-55	20.7	ATP synthase beta subunit	1E-049	gi|215259709	199	105	115	95	92	5	0	10	4	1	1	N
cf-contig_459	1	Ferredoxin	1	Contig-459	Contig459	62.	.	69.9	217	N	1	P18-1190076_039_E05	217	236	162	GEKEDDLLDMAPFLKENSRLGCQIILTKDLDGIGLQMPQATRNFYVDGHKPKPH	2	Cyt		1	80	2	72	2	66	2	XC-contig_179	0.51	Ferredoxin	met/energy	KOG	8e-21	33.9	hypothetical protein AND_22659	7E-022	gi|312371088	107	52	187	92	28	4	0	135	5	1	2	N
cf-contig_744	1	Ferredoxin	1	Contig-744	Contig744	64.2	.	66.2	321	N	1	P11-1189250_075_C09	321	340	249	KVWACEASLACTTCRVYVSDKHRDSLPEPLEKEDDLLDMAPFLKENSRLGCQIILTKDLDGIELQMPQATRNFYVDGHKPKPH	1	Cyt		1	80	2	72	2	66	2	XC-contig_179	0.85	Ferredoxin	met/energy	KOG	2e-32	50.3	AGAP006799-PA	1E-032	gi|158286822	143	79	165	81	48	15	0	86	28	1	1	N
cf-contig_754	1	Malate dehydrogenase	1	Contig-754	Contig754	60.4	.	68.2		N	1	P11-1189280_021_F03		380	258	PGAAGDHMHDLWHGTLPGEFVSMGVLSDGSYNVPRDIIFSFPVTIENKQCKIVQGLPIDEFSKSMLNTTAKELLEEKQEALAVCSL	2	Cyt		1	606	1	626	1	640	1	XC-contig_129	0.2	Malate dehydrogenase	met/energy	KOG	9e-30	25	malate dehydrogenase, putative	2E-028	gi|242008014	129	82	343	73	24	22	0	260	8	1	2	N
cf-contig_563	1	Mitochondrial F1F0-ATP synthase subunit epsilon/ATP15	1	Contig-563	Contig563	62.	.	64.3	261	N	1	P3-1188633_018_H04	261	280	171	RPGETAGLNYINLSTIAARMVRQALKSDLKNEALKRDVSSIKFTPWKDGKAIKSETK	1	Ind		1	459	1	469	1	476	1	XC-contig_151	0.48	Mitochondrial F1F0-ATP synthase subunit epsilon/ATP15	met/energy	KOG	8e-12	88	hypothetical protein EAG_09867	1E-011	gi|307184649	73.6	46	105	76	45	11	0	7	16	1	1	N
cf-contig_666	1	Mitochondrial F1F0-ATP synthase subunit OSCP/ATP5	1	Contig-666	Contig666	62.8	.	72.7	208	N	1	P8-1189080_055_E07	208	227	96	GGGMVVSIGDRYVDMSVASKVKLYTEIISTPV	2	Ind		1	545	1	557	1	569	1	XC-contig_209	0.071	Mitochondrial F1F0-ATP synthase subunit OSCP/ATP5	met/energy	KOG	3e-07	14.7	similar to H+ transporting ATP synthase O subunit	5E-007	gi|91077486	58.2	30	209	83	15	5	0	179	5	1	2	N
cf-contig_445	1	NADH dehydrogenase subunit 1	1	Contig-445	Contig445	46.9	.	80.3	296	N	1	P17-1190010_083_G11	296	315	150	GRGGGFALIFLAEYARILFIRFIFCLMFLGGDYLSFFFFLKLVFLSFIFI	2	Ind		1	78	2	70	2	64	2	XC-contig_241	0.002	NADH dehydrogenase subunit 1	met/energy	KOG	7e-25	30.1	NADH dehydrogenase subunit 1	7E-029	gi|304651517	130	87	313	68	28	28	0	223	11	1	2	N	2.299
cf-contig_696	1	NADH dehydrogenase subunit 1	1	Contig-696	Contig696	60.2	.	78.5	283	N	1	P9-1188507_072_E10	283	302	153	AGGGGGFALIFLAEYARILFIRFIFCLMFLGGDHLSLFFFLKLVFLSFIFI	2	Ind		1	78	2	70	2	64	2	XC-contig_173	0.03	NADH dehydrogenase subunit 1	met/energy	KOG	1e-25	30.1	NADH dehydrogenase subunit 1	6E-029	gi|208433772	130	86	316	67	28	28	0	225	14	1	2	N	2.326
cf-contig_412	1	NADH-ubiquinone oxidoreductase chain 2 - reactive oxygen species metabolic process - respiratory chain - ATP synthesis coupled electron transport -	1	Contig-412	Contig412	58.7	.	86.6	526	N	1	P16-1189861_044_C06	526	545	180	FYFFIYFIISLIITINFNFLKLFYINQILSNSINYITKITLIIIFLSIGGLPPFLGFFPK	3	Ind		1	336	1	344	1	347	1	XC-contig_122	0.005	NADH-ubiquinone oxidoreductase chain 2 - reactive oxygen species metabolic process - respiratory chain - ATP synthesis coupled electron transport -	met/energy	GO	7e-12	30.2	NADH dehydrogenase subunit 2 (mitochondrion)	5E-025	gi|351000171	118	273	337	41	81	90	2	62	5	3	3	Y	1.465
cf-contig_586	1	Ubiquinol-cytochrome C reductase hinge protein	1	Contig-586	Contig586	63.3	.	61.8	324	N	1	P4-1188734_065_H09	324	343	234	RPGAQEATEEEELVDPQQALREKCAEEHHPKSLFEKYQTCNDRVNSRTKTEETCSDELFDYLHALDHCVTKTLWSKLK	1	Ind		1	477	1	488	1	497	1	XC-contig_65	0.18	Ubiquinol-cytochrome C reductase hinge protein	met/energy	PFAM	3e-24	100	similar to AGAP002245-PA	2E-023	gi|91085447	112	69	88	72	80	19	0	19	25	1	1	N
cf-contig_538	1	Adoxophyes honmai mitochondrion complete genome	1	Contig-538	Contig538	57.1	.	80.6	115	N	1	P2-1190472_033_H05	115	134	93	PGVEDPYIITGQILTILYFSYYLINPYIYYK	3	Ind		1	440	1	450	1	456	1	XC-contig_233	0.2	Adoxophyes honmai mitochondrion complete genome	met/energy	MIT-PLA	3e-11	0.2	cytochrome b	1E-006	gi|159524441	57	33	378	70	9	10	0	344	9	1	3	N	3.03
Metabolism, intermediary
cf-contig_341	1	Monooxygenase involved in coenzyme Q (ubiquinone) biosynthesis	1	Contig-341	Contig341	43.8	0.6	61.5	308	N	1	P1-1152549_004_G02	308	327	273	QVDSTEISNIKAEVRSTYNGCHRSITSSVRNRRYICCFGKIYRPSIDVSSHTSQEINYATSSREIDPYLLKVFIIVNILNKELCSIKKKKK	3	Cyt		1	274	1	280	1	279	1	XC-contig_5	0.17	Monooxygenase involved in coenzyme Q (ubiquinone) biosynthesis	met/int	KOG	2e-13	15.3	ubiquinone biosynthesis monooxygenase COQ6-like	2E-012	gi|66509969	76.3	73	474	52	16	36	0	398	19	1	1	N
Metabolism, lipid
cf-contig_597	1	2-enoyl-CoA hydratase/3-hydroxyacyl-CoA dehydrogenase/Peroxisomal 3-ketoacyl-CoA-thiolase sterol-binding domain	1	Contig-597	Contig597	64.	.	67.6	355	N	1	P5-1188778_041_D05	355	374	216	TSSRLHDGQAEDLRRSSKGYETGKADGKAKIKIVNKKNYYIVKSIAGFSSVVWELKCVFSTCDCFCTYTSKI	2	Cyt		1	88	2	497	1	506	1	XC-contig_8	0.14	2-enoyl-CoA hydratase/3-hydroxyacyl-CoA dehydrogenase/Peroxisomal 3-ketoacyl-CoA-thiolase sterol-binding domain	met/lipd	KOG	5e-17	53.9	hydroxysteroid dehydrogenase-like protein 2-like	4E-016	gi|156548625	88.2	61	409	71	15	18	0	348	3	1	3	N
cf-contig_743	1	hydroxysteroid dehydrogenase-like protein 2-like	1	Contig-743	Contig743	63.4	.	63.1	558	N	1	P11-1189249_060_C08	558	577	393	GRGNRLTAGGSSSGSVDFSGKIGHLFQVINANLGPEIVQSTNAIYQFEVTGSEKSTWHLNLKEGAGSVGRGPPTKQKADAVLTMDTDNFLKMFGGQLKPAVAYMMGKLKISGDLQKAMKLEKLMAKLKSKL	3	Cyt		1	88	2	618	1	632	1	XC-contig_8	0.067	hydroxysteroid dehydrogenase-like protein 2-like	met/lipd	NR	7e-33	31	hydroxysteroid dehydrogenase-like protein 2-like	7E-033	gi|156548625	144	124	409	59	31	52	0	285	15	1	3	N
cf-contig_727	1	Fatty acid desaturase - signalP detected	1	Contig-727	Contig727	58.4	.	63.9	737	N	1	P10-1189179_072_E10	737	756	522	PGMFQKSFYWPMYIILTLLLPINAPMEYWGENFVNSFFIIGCTRYLLALHASWLINSARHVWGIKRGERYPSDSNMIFFITKSYWPSYHYMLPWDYQSGEYGTYGSGCSTAFIRVFAALGLATNLRTMDSASVKKALANSVDTGKPIEQCLEEVGSKAQQKFHPEHYLDAVKRF	3	SIG	2,3,	1	590	1	606	1	619	1	XC-contig_49	1e-05	Fatty acid desaturase - signalP detected	s/met/lipd Fatty	KOG	3e-32	44.8	stearoyl-coa desaturase	4E-053	gi|157137510	212	164	363	57	45	71	0	193	9	1	3	N
Metabolism, nucleotide
cf-contig_413	1	exosomal 3'-5' exoribonuclease complex subunit ski4	1	Contig-413	Contig413	66.	.	63.7	491	N	1	P16-1189864_075_C09	491	510	429	RGRSSIVPAPGDIVTAKVMIVNQRVARCNIICIGDTTLSRSYRGILRKEDVRATEKDRVDIYKCVRPGDIILARVLPITELHCYQLTTAENELGVVASMSPAGVPMVPVSWTEVQCPNTLIKQPRKVARIIPESLAVTTDLKS	3	Cyt		1	337	1	345	1	348	1	XC-contig_106	0.08	exosomal 3'-5' exoribonuclease complex subunit ski4	met/nuc	NR	6e-48	68.2	exosome complex component CSL4-like	1E-049	gi|156538385	199	132	198	73	67	35	0	63	15	1	3	N
Nuclear Regulation
cf-contig_787	1	DNA polymerase delta catalytic subunit	1	Contig-787	Contig787	63.8	.	65.1	193	N	1	P13-1189501_050_H08	193	212	156	GIWTECQRCQGSLHEEVICTNRDCPIFYMRKKIQIELDTQVKRVERFGLPSW	2	Ind		1	632	1	653	1	669	1	XC-contig_87	2.2	DNA polymerase delta catalytic subunit	nr	NR	7e-24	5	DNA polymerase delta catalytic subunit	7E-024	gi|324120768	114	50	1002	98	5	1	0	952	5	1	2	N
cf-contig_637	1	SNF2 family DNA-dependent ATPase	1	Contig-637	Contig637	50.	.	63.6	431	N	1	P7-1188956_027_C03	431	450	282	GAGYRAITAGEDRCHRMGQKRPVTIYRLISKGTIEEGMLQVAREKLNLEREVTTNTENDPQEVKNVVRLLTLALGVDSNKAANLLTPSPRKSES	3	Cyt		1	521	1	533	1	543	1	XC-contig_127	0.46	SNF2 family DNA-dependent ATPase	nr	KOG	7e-20	7.5	similar to helicase	2E-021	gi|91089209	105	80	871	62	9	31	0	791	33	1	3	N
Protein Export
cf-contig_718	1	beta-coatomer protein - regulation of lipid storage - phagocytosis engulfment - intracellular protein transport - structural molecule - binding - - signalP detected	1	Contig-718	Contig718	63.4	.	68.9	360	N	1	P10-1189158_009_D01	380	399	246	AGDTGKALSGQCGFMAANMYARSIFGEDALANLSIEKPFNKPDAPVIGHIRIRAKSQGMALSMGDKINMTQKMPLQQKICAA	1	SIG	2,	1	582	1	598	1	611	1	XC-contig_158	0.082	beta-coatomer protein - regulation of lipid storage - phagocytosis engulfment - intracellular protein transport - structural molecule - binding - - signalP detected	pe	GO	1e-25	7.3	similar to coatomer subunit beta	1E-029	gi|189234428	133	75	957	88	8	9	0	882	16	1	1	N
cf-contig_460	1	emp24/gp25L/p24 family of membrane trafficking	1	Contig-460	Contig460	64.6	.	73.5	339	N	1	P18-1190079_056_E08	339	358	192	EINRISYISCEYIQISFIYVVILYFVVYLVAQKPHTHSFFSAILIQSYNFLFTDVLVNVRSNKN	2	Ind		1	373	1	382	1	387	1	XC-contig_115	0.099	emp24/gp25L/p24 family of membrane trafficking	pe	KOG	1e-16	19.5	Transmembrane emp24 domain-containing protein bai; Flags: Precursor	9E-016	gi|296439817	87	41	206	97	20	1	0	165	12	1	3	N
cf-contig_364	1	sec71 - binding - regulation of ARF protein signal transduction - ER to Golgi vesicle-mediated transport - ARF guanyl-nucleotide exchange factor -	1	Contig-364	Contig364	60.4	.	72.9	843	N	1	P14-1189553_090_D12	843	862	213	GRGDAWTNILLLILMRILKMPDDRFAAHVSSYYNLLCEITCCDLKAELRSVLRRVFLRIGPVFSITSNTPS	2	Cyt		1	293	1	300	1	301	1	XC-contig_209	0.002	sec71 - binding - regulation of ARF protein signal transduction - ER to Golgi vesicle-mediated transport - ARF guanyl-nucleotide exchange factor -	pe	GO	8e-21	3.8	similar to CG7578-PA	8E-022	gi|183979311	108	63	330	82	19	11	0	265	11	1	2	N
cf-contig_580	1	Translocon-associated protein	1	Contig-580	Contig580	64.3	.	66.3	370	N	1	P4-1188708_053_F07	370	389	303	AGVMPTARIGDNKYQVSWTEEINKARSGYHKVRLYDEEGYTAVRKAMRSGEDASAVRSLVTIVISHPGAFTGPWVNSELVASLAAVGVAYLAFTSKYKLLL	2	Cyt		1	473	1	483	1	492	1	XC-contig_179	1.9	Translocon-associated protein	pe	PFAM	4e-39	59.2	Translocon-associated protein subunit delta	5E-027	gi|307199097	124	97	169	57	58	42	1	71	11	1	2	N
cf-contig_701	1	Vacuolar protein sorting-associated protein 53 homolog - membrane - protein transport - endosome membrane - Golgi apparatus - endosome	1	Contig-701	Contig701	64.5	0.4	72	464	N	1	P9-1188521_086_F12	464	483	306	XPGETKAEMILKVVMAPITPPQSFTEQFLKLLPECHISEFHKVLDMKGLKRNEQTTLVEIFKSQAPSLIVTDDESQCSHDSPDHDTGRIRKLEKLIKKRLPN	3	Cyt		1	571	1	586	1	598	1	XC-contig_251	0.27	Vacuolar protein sorting-associated protein 53 homolog - membrane - protein transport - endosome membrane - Golgi apparatus - endosome	pe	GO	3e-21	12.1	hypothetical protein BRAFLDRAFT_92989	4E-021	gi|260830635	104	97	824	53	12	46	0	727	9	1	3	N
cf-contig_508	1	Vesicle coat protein clathrin light chain	1	Contig-508	Contig508	65.	.	72.5	501	N	1	P20-1190292_035_G05	501	520	288	RGRRKKKSELREQAKLELEEWYKHHEEQIKKTKSTNRSAEKQFVAETDEIEPGTEWERIAKLCDFNPKSTKTNKDVSRMRSIILQLKQSPLTAKKA	3	Cyt		1	415	1	424	1	429	1	XC-contig_146	0.083	Vesicle coat protein clathrin light chain	pe	KOG	2e-28	41.6	AGAP010608-PA	7E-038	gi|158293252	160	94	219	80	43	19	0	123	3	1	3	N
cf-contig_439	1	gamma-coatomer protein - larval salivary gland morphogenesis - endoplasmic reticulum - regulation of tube diameter open tracheal system -	1	Contig-439	Contig439	64.9	.	70.3	483	N	1	P17-1189984_071_E09	483	502	306	AGDAADNEQWIQLEDTYALSSLNTLQEAVKTILTFLGLAPSEGSERVPEGKTTHTLLCSGMFRGGIDVLVRAKLALSDGVTMQLTVRSTHPDVADLITSAVG	1	Cyt		1	355	1	364	1	369	1	XC-contig_7	5e-49	gamma-coatomer protein - larval salivary gland morphogenesis - endoplasmic reticulum - regulation of tube diameter open tracheal system -	tf	GO	4e-31	11.3	similar to RE62270p	9E-032	gi|91090890	140	91	879	73	10	24	0	788	31	1	1	N
Protein modification
cf-contig_601	1	10 kDa heat shock protein mitochondrial-like	1	Contig-601	Contig601	54.	0.1	64.8	737	N	1	P5-1188783_074_D10	737	756	342	ILKKTIQKMATQTVAKRLLPLLDRVLVQRAEAITKTKGGIVIPEKAQAKVLKGRVIAVGPGQRNQAGEHVPLGIKVGDMVLLPEYGGTKVELEENKEFHLFKESDILAKLDIDE	1	Cyt		1	488	1	500	1	510	1	XC-contig_156	0.33	10 kDa heat shock protein mitochondrial-like	pm	NR	5e-41	100	10 kDa heat shock protein, mitochondrial-like	5E-041	gi|350418457	172	103	104	77	100	23	0	1	85	1	1	N
cf-contig_462	1	20S proteasome regulatory subunit alpha type PSMA3/PRE10	1	Contig-462	Contig462	65.4	.	70.3	361	N	1	P18-1190088_037_F05	361	380	261	AGGQEAARIIYLVHDELKDKNFELELSWVCAESNGVHERVPASVRQEAESQAKQVFIDIILLKTIDDDIFILSTEIKYRYYMKFEIF	1	Ind		1	375	1	384	1	389	1	XC-contig_72	0.14	20S proteasome regulatory subunit alpha type PSMA3/PRE10	pm	KOG	7e-16	19.6	proteasome subunit alpha type-3	1E-014	gi|48096769	83.2	62	254	48	25	50	0	191	10	1	1	N	1.613
cf-contig_157	3	Calreticulin	3	Contig-157	Contig157	82.1	.	66.7	681	N	3	P11-1189218_015_A01	597	700	390	PGAPKQIDNPDYKGVWVHPEIDNPEYVPDTQLYKRDEICAIGLDLWQVKAGTIFDNILITDDVDYAKKIAEGVKSTQEGEKKMKDAQDEEERKAREAETKEENDTDADEDLDDNAETPEEDTLDAEHDEL	3	Cyt		3	21	3	143	1	140	1	XC-contig_57	4e-07	Calreticulin	pm	KOG	1e-39	32	calreticulin-like	3E-043	gi|350402084	179	127	403	67	32	42	2	276	12	1	3	N
cf-contig_728	1	Cyclophilin type peptidyl-prolyl cis-trans isomerase	1	Contig-728	Contig728	65.1	.	68.3	337	N	1	P10-1189185_022_F04	337	356	138	PGGHRHVVFGSVVEGMDVVKKLESYGSQSGKTNKKIVINDCGELPS	2	Ind		1	591	1	607	1	620	1	XC-contig_229	0.25	Cyclophilin type peptidyl-prolyl cis-trans isomerase	pm	KOG	1e-14	24.5	similar to cyclophilin-like protein isoform 1	1E-011	gi|91076258	73.6	40	164	80	25	8	0	124	11	1	2	N
cf-contig_591	1	DNA binding - protein folding - unfolded protein binding - regulation of transcription DNA-dependent - heat shock protein binding	1	Contig-591	Contig591	23.6	0.5	55.9	761	N	1	P5-1188761_094_B12	1012	1031	342	TPLSSFYLLPEVPSFVETKGGKLGEALTENVSNVENSWSQEQQKALESALTKYPKNSTQDRWEKIAKCVQGKNKEECILRYKYLVELVKKQNQPKEEENQEPVQEANKIESTDT	1	Cyt		1	481	1	492	1	501	1	XC-contig_26	4e-06	DNA binding - protein folding - unfolded protein binding - regulation of transcription DNA-dependent - heat shock protein binding	pm	GO	4e-17	18	GJ19169	1E-022	gi|195392842	92.4	178	529	40	34	85	2	304	204	2	1	Y	1.685
cf-contig_298	1	DNAJ chaperone Culex quinquefasciatus	1	Contig-298	Contig298	49.3	0.1	66.8	1032	N	1	CAFL_P1-076_C10	1032	1051	486	PXRIVIVLDEKDHPTFKRSGSDLILRMNIQLVEALCGFQKVVKTLDDRDLVMTCLPGEVIKHGDVKCVLNEGMPQYKNPFEEGRLIVQFLVTFPNVIPPEMVAALERCLPPRPVVEIPPGAEECMLIDMDPEQEARRRSHKNAYDEDDEGGPGANRVQCATS	1	Cyt		1	240	1	245	1	244	1	XC-contig_78	0.014	DNAJ chaperone Culex quinquefasciatus	pm	NR	3e-56	40.4	DnaJ (Hsp40) homolog 2	2E-061	gi|114053203	241	161	401	71	40	46	1	240	1	1	1	N
cf-contig_556	1	Glutaredoxin	1	Contig-556	Contig556	64.8	.	58.6	382	N	1	P3-1188612_053_F07	382	401	336	AGRTVRNAGAMSVQTQQFVKDLIASDVVVIFSKSYCPYCKMAKEVFDTLKRKYTAIELDGRDDGDSIQAVLGEITGAHTVPRVFVNGECLGGGSDVKSLYESGELETIMSKV	2	Cyt		1	453	1	463	1	470	1	XC-contig_235	3e-33	Glutaredoxin	pm	KOG	8e-30	94.2	hypothetical protein SINV_02491	1E-033	gi|322797527	146	91	98	76	94	22	0	4	44	1	2	N
cf-contig_669	1	Hydrolytic enzymes of the alpha/beta hydrolase fold	1	Contig-669	Contig669	63.5	0.3	63.8	362	N	1	P8-1189087_006_F02	362	381	249	GGAQNIIXRSPKYSYNQNCIRAWFHRSLACTRNHKVDEEGKSCCLYQGYCTLCKYVSSKGFRFASIESSETVCRAVDQKVVKR	3	Cyt		1	547	1	559	1	571	1	XC-contig_88	0.03	Hydrolytic enzymes of the alpha/beta hydrolase fold	pm	KOG	2e-24	15.1	hypothetical protein TcasGA2_TC003450	1E-022	gi|270004132	110	79	473	62	17	30	0	392	7	1	1	N	1.266
cf-contig_516	1	Oligosaccharyltransferase beta subunit	1	Contig-516	Contig516	62.6	.	73.4	195	N	1	P2-1190397_014_B02	195	214	135	WLECSYFHLYFYIAKKSLLSQNMNKCIYLNRNNVLLYCFFNKKII	3	Ind		1	421	1	430	1	435	1	XC-contig_209	0.036	Oligosaccharyltransferase beta subunit	pm	KOG	8e-11	8.5	GF19216	2E-008	gi|194769430	62.4	32	449	81	7	6	0	406	11	1	2	N
cf-contig_628	1	Oligosaccharyltransferase STT3 subunit	1	Contig-628	Contig628	65.5	.	70.3	443	N	1	P6-1188905_086_F12	443	462	234	GRGREGSQTLLNSLMYKMCYYRFGEVYTEGGKPPGYDRVRSAEIGNKDFELDVLEEAYTTEHWLVRIYKVKDLRNRGV	1	Cyt		1	513	1	525	1	535	1	XC-contig_215	0.25	Oligosaccharyltransferase STT3 subunit	pm	KOG	2e-34	9.5	hypothetical protein TcasGA2_TC010433	5E-035	gi|270006562	150	74	706	93	11	5	0	632	10	1	1	N
cf-contig_775	1	prolyl endopeptidase	1	Contig-775	Contig775	43.3	.	65.5		N	1	P13-1189467_072_E10		374	216	GRVVPLHTLKYIATLQHAVRDSPIQQKPLMALISTRAGHGGGKPTTKVIEEITDIYSFIAKSLGLTYHGETL	1	Cyt		1	622	1	643	1	659	1	XC-contig_227	0.055	prolyl endopeptidase	pm/protease	NR	5e-17	9.4	unnamed protein product	1E-017	gi|47222200	93.6	65	731	66	9	22	0	666	4	1	1	N
cf-contig_584	1	serine protease P153	1	Contig-584	Contig584	65.1	.	66	522	N	1	P4-1188731_034_H06	522	541	318	RPESLEPLRAGWVPLQSMDVCRMPQVYGGNIMEGMVCAGELDEGVDACDGDSGGPLACLHEGAFTLYGITSWGQHCGHANKPGVYVKVAHYRDWIDQKIKLSMTEK	1	Cyt		1	476	1	486	1	495	1	XC-contig_63	0.12	serine protease P153	pm/protease	NR	1e-39	11.3	serine protease P153	1E-039	gi|270009237	166	89	792	75	11	22	0	695	22	1	1	N
Proteasome machinery
cf-contig_89	6	E3 ubiquitin-protein ligase RBBP6	6	Contig-89	Contig89	65.8	.	77.1	729	N	6	P13-1189421_096_A12	770	748	474	LVAVLKRKYIFLYWVYFLILKHFEASLCENLKKQLENENQEKKSNPAIKFIGKKHPDSQTQKANLKNQLKNSYSTNKRPQLTKDFKVIKEEFEDLQEHFRQKTKKRKCKKHKGRKKHKKHGKHRKHRKHADFDPNEVIKVLEMYEKQHEHKHHDQFAE	2	Cyt		6	115	1	110	1	107	1	XC-contig_209	0.003	E3 ubiquitin-protein ligase RBBP6	prot	SWISSP	2e-05	3.2	hypothetical protein Mtub2_12463	3E-008	gi|294995292	63.5	224	244	29	92	139	0	20	137	4	-1	N	5.804
cf-contig_142	3	Predicted ubiquitin-protein ligase/hyperplastic discs protein HECT superfamily	3	Contig-142	Contig142	75.3	.	70.5	446	N	3	P2-1190385_016_A02	452	465	330	GGWENKKYKKAGGHEDDQHHENDQSDGHTSHVSQDMDHVEEDAHEDQNDQIGHYDDAAEEHTEEEDGDNGEYYDQDYDENDHEGYDEEHTQDNSHDFEENDKTIPFYNPK	2	Cyt		3	137	1	134	1	131	1	XC-contig_150	4e-06	Predicted ubiquitin-protein ligase/hyperplastic discs protein HECT superfamily	prot	KOG	3e-05	2.9	hypothetical protein LOC100650428	8E-010	gi|340709124	67.4	125	598	28	21	69	0	40	11	8	2	N
cf-contig_536	1	proteasome (prosome macropain) 26S subunit non-ATPase 1 - proteasome complex - regulation of protein catabolic process - enzyme regulator -	1	Contig-536	Contig536	63.6	.	59.7	259	N	1	P2-1190470_017_H03	259	278	147	NTMQPVTRPWWSPWLHSAPNRRPRRRNRTLRSLSSISTENLLILMQFLP	2	Cyt		1	438	1	448	1	454	1	XC-contig_140	0.13	proteasome (prosome macropain) 26S subunit non-ATPase 1 - proteasome complex - regulation of protein catabolic process - enzyme regulator -	prot	GO	8e-08	4.3	26S proteasome non-ATPase regulatory subunit 1-like isoform 1	2E-006	gi|328714367	56.2	42	979	63	4	16	2	936	13	1	1	N
cf-contig_785	1	Proteasome activator complex subunit 4 (Proteasome activator PA200)	1	Contig-785	Contig785	61.1	0.3	70.8	344	N	1	P13-1189487_036_G06	344	363	153	MTLNPFHLQLEKXLGDFKRTHHDNWETHKLKFTDEQLTVLGELVVPPSYYV	1	Cyt		1	630	1	651	1	667	1	XC-contig_104	0.19	Proteasome activator complex subunit 4 (Proteasome activator PA200)	prot	NR	3e-15	2.5	hypothetical protein TcasGA2_TC013292	3E-015	gi|270010813	73.9	51	1831	67	3	15	0	1779	9	2	1	Y
cf-contig_251	1	proteasome subunit beta 1	1	Contig-251	Contig251	67.7	.	64.4	220	N	1	CAFM_P2-064_A08	220	239	162	NITPAPIPKEKALIIIKDVFVSAAERDIYTGDGILIKIITKEGIVEEKFELRRD	3	Ind		1	199	1	202	1	200	1	XC-contig_81	0.71	proteasome subunit beta 1	prot	NR	8e-15	23.2	proteasome subunit beta 1	8E-015	gi|211939905	84	53	232	75	23	13	0	179	3	1	3	N
cf-contig_346	1	ubiquitin protein ligase Glossina morsitans morsitans	1	Contig-346	Contig346	57.9	.	69.3	362	N	1	P1-1152560_001_H01	362	381	165	GPAEFGITAGGIQDLLNEPNVKDPAQAEAYTIYCQNRMEYDKRVKAQARAMAAID	2	Ind		1	278	1	284	1	284	1	XC-contig_201	0.28	ubiquitin protein ligase Glossina morsitans morsitans	prot	NR	2e-15	28	ubiquitin-conjugating enzyme E2 isoform 2	4E-016	gi|95102778	88.2	44	131	91	34	4	0	87	32	1	2	N
cf-contig_422	1	ubiquitin-protein ligase 1 - ubiquitin-dependent protein catabolic process	1	Contig-422	Contig422	64.3	.	73.6	560	N	1	P16-1189914_083_G11	560	579	357	PGSQNSSNIGHQNFSKIETEIKDKLKLASSISESFEASDEDFEKNSNRVNDSKNNKKHHSQKPNSNKRSQILDTSKNRMIQHNNESSSEEFDGSEENVKNLLSTKDSSSESFDSSTEVL	2	Cyt		1	344	1	353	1	356	1	XC-contig_237	0.019	ubiquitin-protein ligase 1 - ubiquitin-dependent protein catabolic process	prot	GO	5e-05	1.2	hypothetical protein DICPUDRAFT_89628	2E-005	gi|330833818	53.1	126	312	33	41	76	0	158	11	2	2	N
cf-contig_90	2	Uncharacterized protein - metal ion binding - protein ubiquitination involved in ubiquitin-dependent protein catabolic process - zinc ion binding -	2	Contig-90	Contig90	79.7	0.2	76.4	455	N	2	P14-1189528_093_B11	519	474	294	XVQNRNSHKQNSLGGQNGHLTKDFKVLEEDFEDLQKHFHGIPKKKRKSKKHKCGKKHRKHRKHRKHKKHHYLDVNEVMKYLKMHEKEHEHEKHDQFAE	2	Ind		2	36	2	29	2	27	2	XC-contig_71	0.011	Uncharacterized protein - metal ion binding - protein ubiquitination involved in ubiquitin-dependent protein catabolic process - zinc ion binding -	prot	GO	5e-06	3	hypothetical protein MetalDRAFT_1346	7E-006	gi|334110345	54.3	78	97	41	81	32	0	6	86	4	2	N
cf-contig_91	1	Uncharacterized protein - metal ion binding - protein ubiquitination involved in ubiquitin-dependent protein catabolic process - zinc ion binding -	1	Contig-91	Contig91	58.3	.	77.7	850	N	1	P18-1190061_010_D02	850	869	438	GRGKKLEDANPEEKSNLDNAQGIKFMPSKDGPSDTDTTSQNHIQNLLKQVQNRNSHKQNSLGGQNGHLTKDFKVLEEDFEDLQKHFHGIPKKKRKSKKHKCGKKHRKHRKHRKHKKHHYLDVNEVMKYLKMHEKEHEHEKHDQFAE	1	Cyt		1	36	2	29	2	27	2	XC-contig_71	0.022	Uncharacterized protein - metal ion binding - protein ubiquitination involved in ubiquitin-dependent protein catabolic process - zinc ion binding -	prot	GO	2e-05	3	hypothetical protein MetalDRAFT_1346	2E-005	gi|334110345	54.3	78	97	41	81	32	0	6	229	4	1	N
Protein synthesis machinery
cf-contig_178	3	40S ribosomal protein S13	3	Contig-178	Contig178	93.6	.	63.7	317	N	3	P4-1188667_012_C02	341	336	237	PGMKAMGVAPELPEDLYYLIKKAVAIRKHLERNRKDKDSKFRLILVESRIHRLARYYKTKSILAPNWKYESSTASALVA	2	Cyt		3	46	2	39	2	36	2	XC-contig_106	2e-50	40S ribosomal protein S13	ps	KOG	4e-38	50.9	ribosomal protein S13	4E-035	gi|121511938	151	76	151	97	51	2	0	75	8	1	2	N
cf-contig_179	1	40S ribosomal protein S13	1	Contig-179	Contig179	62.3	0.4	64.8	254	N	1	P9-1188464_029_B03	254	273	216	PGVAIRKXFGKEPQGQRQQIPFDSCRIKNSQTCPLLQNKEHLGTQLEIRIQHCICTCSLRCFNECEVYYNKM	2	Ind		1	46	2	39	2	36	2	XC-contig_106	1e-32	40S ribosomal protein S13	ps	KOG	4e-23	34.4	ribosomal protein S13	2E-019	gi|121511938	99.4	49	151	98	33	1	0	102	27	1	3	N
cf-contig_200	3	40S ribosomal protein S14	3	Contig-200	Contig200	79.9	.	53.2	288	N	3	P9-1188541_050_H08	288	310	204	EMQSLGITALHIKLRATGGNKTKTPGPGAQSALRALARSSMKIGRIEDVTPIPSDSTRRKGGRRGRRL	1	Cyt		3	169	1	171	1	169	1	XC-contig_179	1.9	40S ribosomal protein S14	ps	KOG	8e-33	47.4	40S ribosomal protein S14	1E-028	gi|335057540	129	65	151	98	44	1	0	86	25	1	1	N
cf-contig_406	1	40S ribosomal protein S15	1	Contig-406	Contig406	57.8	0.6	67.1	154	N	1	P16-1189838_063_A07	154	173	132	HISLLNTVDQVLVLHTVPDLFHLNKNVCFPLIYLFGKVKKKKKK	1	Ind		1	332	1	340	1	341	1	XC-contig_151	0.024	40S ribosomal protein S15	ps	KOG	1e-15	22.3	40S ribosomal protein S15-like	2E-011	gi|345329793	72.8	43	163	73	27	12	0	112	9	1	3	N	2.326
cf-contig_801	1	40S ribosomal protein S15	1	Contig-801	Contig801	59.2	.	62.5	442	N	1	P12-1189374_005_F01	442	461	399	SAITAGGVDLDQLLDMPNEQLMELMHARARRRFARGLKRKPMALVKKLRKAKKDAPPNEKPEIVKTHLRNMIIVPEMVGSIVGVYNGKTFNQVEIKPEMIGHYLGEFSVTYKPVKHGRPGIGATHSSRFIPLK	1	Cyt		1	644	1	666	1	682	1	XC-contig_50	0.015	40S ribosomal protein S15	ps	KOG	2e-72	83.5	ribosomal protein S15e	1E-066	gi|70909559	256	129	148	96	88	4	0	19	10	1	1	N
cf-contig_130	6	40S ribosomal protein S15/S22	6	Contig-130	Contig130	87.3	.	69.7	131	N	6	P16-1189919_018_H04	134	152	90	YVVLTTSGGIMDHEEARRKHWGGKILGFFF	1	Ind		6	135	1	131	1	128	1	XC-contig_101	3e-17	40S ribosomal protein S15/S22	ps	KOG	1e-10	23	40S ribosomal protein S15/S22	1E-008	gi|342906230	63.2	29	118	96	25	1	0	89	1	1	1	N
cf-contig_152	5	40S ribosomal protein S16	5	Contig-152	Contig152	88.4	.	59.5	419	N	5	P18-1190083_088_E12	421	440	366	GRGGRGNLRVNGRPLELVEPKVLQYKLQEPILLLGKEKFAGVDIRVRVNGGGHVAQIYAIRQAISKALVSYYQKYVDEASKKEIKDMLIQYDRTLFVADPRRCEPKKFGGPGARARYQKSYR	3	Ind		5	143	1	140	1	137	1	XC-contig_187	1e-79	40S ribosomal protein S16	ps	KOG	7e-62	82	40S ribosomal protein S16	1E-059	gi|121511948	232	118	148	95	80	5	0	30	12	1	3	N
cf-contig_102	2	40S ribosomal protein S2	2	Contig-102	Contig102	70.9	.	58.7	342	N	2	P11-1189226_079_A09	342	361	267	AGHPNRQATISVVPSAASLVIKALKEPPRDRKKQKNIKHNGNITFDDIVAIARQMRPRSMARELSGTIKEVLGTAQSVGCTMMAGHPMT	3	Ind		2	120	1	115	1	112	1	XC-contig_159	6e-58	40S ribosomal protein S2	ps	KOG	1e-37	49	60S ribosomal protein L12-like	1E-034	gi|332220948	130	99	165	78	61	18	0	66	15	2	3	Y
cf-contig_103	5	40S ribosomal protein S2	5	Contig-103	Contig103	88.1	.	63	195	N	5	CAFL_P1-007_E01	192	219	171	IVAIARQMRPRSMARELSGTIKEVLGTAQSVGCTIDGRAPHDLIDDINDGTLECPAA	1	Cyt		5	121	1	116	1	113	1	XC-contig_159	9e-35	40S ribosomal protein S2	ps	KOG	3e-22	33.5	60S ribosomal protein L12	1E-019	gi|170059827	100	55	165	82	34	10	0	109	1	1	1	N
cf-contig_187	4	40S ribosomal protein S2/30S ribosomal protein S5	4	Contig-187	Contig187	85.4	.	57.3	508	N	4	P3-1188621_020_G04	508	527	465	RGHIGLGVKCSKEVATAIRGAIILAKLSVVPVRRGYWGNKIGKPHTVPCKVTGKCGSVAVRLIPAPRGTGIVSAPVPKKLLQMAGIEDCYTSARGSTGTLGNFAKATYAAIAKTYSYLTPDLWKEMPLTKTPYQEFADFLAKTVHKPGMRTIDMN	3	Cyt		4	162	1	164	1	162	1	XC-contig_103	0.018	40S ribosomal protein S2/30S ribosomal protein S5	ps	KOG	1e-65	61	similar to ribosomal protein S2	4E-076	gi|91081061	287	144	278	95	52	6	0	123	6	1	3	N
cf-contig_320	1	40S ribosomal protein S23	1	Contig-320	Contig320	66.2	.	69.5	204	N	1	CAFL_P1-083_G11	204	223	117	FGRKGHAVGDIPGVRFKVVKVANVSLLALYREKKERPRS	2	Ind		1	66	2	58	2	55	2	XC-contig_154	8e-23	40S ribosomal protein S23	ps	KOG	1e-17	27.2	ribosomal protein S23	2E-013	gi|342356365	79.3	38	143	97	27	1	0	105	2	1	2	N
cf-contig_721	1	40S ribosomal protein S23	1	Contig-721	Contig721	58.6	.	60.8	259	N	1	P10-1189168_089_D11	259	278	171	GAGQSAITAGDDEVLVAGFGRKGHAVGDIPGVRFKVVKVANVSLLALYREKKGRPRS	3	Ind		1	66	2	58	2	55	2	XC-contig_154	2e-26	40S ribosomal protein S23	ps	KOG	1e-20	32.8	ribosomal protein S23	3E-017	gi|224924402	92	47	143	93	34	3	0	96	30	1	3	N
cf-contig_221	3	40S ribosomal protein S3	3	Contig-221	Contig221	89.8	.	59.6	365	N	3	P8-1189079_040_E06	365	384	306	GRGTRAKSMKFIDGLMIHSGDPCNDYVDTATRHVLLRQGVLGIKVKIMLPFDPAGKQGPKKPLPDNVSVVDPKEEPLPTVPSSESKVPKPEVPSVLPAMAMA	2	Cyt		3	179	1	182	1	180	1	XC-contig_103	7e-66	40S ribosomal protein S3	ps	NR	2e-50	41.5	40S ribosomal protein S3	2E-050	gi|121511934	202	100	243	96	42	4	0	143	5	1	2	N
cf-contig_128	6	40S ribosomal protein S3A	6	Contig-128	Contig128	94.	.	61.1	789	N	6	P19-1190198_051_G07	823	815	753	GGVKKKVVDPFTRKDWYDVKAPSMFATRQIGKTLVNRTQGTRIAADGLKHRVFEVSLADLQNDHDAERSYRKFRLIAEDVQGRNVLTNFHGMDLTTDKLRSMVKKWQSLVEANIDVRTTDGYLLRVFCIGFTTKDQMSQRKTCYAQHSQICAIRKKMCEIITRDVTSSDLKEVVNKLLPDSIGKDIEKACQGIYPLHDVFIRKVKVLKKPRFDLSKLLELHGDGGKGTEGVTEGAQVDRPEGYEPPVQDAV	2	Cyt		6	133	1	129	1	126	1	XC-contig_230	8e-87	40S ribosomal protein S3A	ps	KOG	1e-98	96.3	40S ribosomal protein S3a gi|57869784|gb|AAW57773.1| Parcxpwex01	1E-124	gi|74901606	448	247	263	88	94	30	0	16	5	1	2	N
cf-contig_194	4	40S ribosomal protein S4	4	Contig-194	Contig194	87.4	.	63.4	250	N	4	P13-1189451_042_D06	259	276	219	RGVGTVVNRERHPGSFDIVHIKDSQGHTFATRLNNVFIIGKGSKAYVSLPRGKGVKLSIAEERDKRLAAKSAH	3	Ind		4	165	1	167	1	165	1	XC-contig_208	9e-45	40S ribosomal protein S4	ps	SWISSP	6e-32	26.4	ribosomal protein S4e	9E-032	gi|70909489	140	70	262	97	27	2	0	192	9	1	3	N
cf-contig_97	5	40S ribosomal protein S6	5	Contig-97	Contig97	80.8	.	55	507	N	5	P8-1189056_059_C07	532	527	465	TAGGCIVDSNLSVLALVIVRKGVNEIPGLTDGNVPRRLGPKRASKIRKLFNLSKEDDVRRYVVRRPLPVKEGKKPRTKAPKIQRLITPAVLQRKRHRLTLKKKRCLKRKEQAADYAKLLAQRKKESKVRRQEELKRRRSASMRDSKSSASSAPQK	2	Ind		5	39	2	32	2	30	2	XC-contig_137	3e-95	40S ribosomal protein S6	ps	KOG	6e-55	59	ribosomal protein S6	2E-065	gi|112982661	252	154	253	84	61	24	3	99	11	1	2	N
cf-contig_170	3	40S ribosomal protein S7	3	Contig-170	Contig170	92.4	.	65	541	N	3	P9-1188461_096_A12	541	560	510	PGALLELEMNSDLKAQLRDLHITRAREIELNNKKSIIIYVPMPKLKAFQKVQTRLVRELEKKFSGNHVVFVGERKILPKPTRKTRTKNKQKRPRSRTLTSVYDAILEDLVFPAEIVGKRIRVKLDGSQLIKVHLDKSQQTTIEHKVDTFTSVYKKLTGREVTFEFPESYL	1	Cyt		3	23	3	20	3	19	3	XC-contig_81	1e-109	40S ribosomal protein S7	ps	KOG	7e-73	89	ribosomal protein S7	2E-087	gi|121512008	325	167	191	98	88	2	0	24	7	1	1	N
cf-contig_171	1	40S ribosomal protein S7	1	Contig-171	Contig171	64.9	.	65.1	534	N	1	P7-1189021_050_H08	534	553	501	PGELEMNSDLKAQLRDLHITRAREIELNNKKSIIIYVPMPKLKAFQKVQSRLVRELEKKFSGNHVVFVGERKILPKPTRKTRTKNKQKRPRSRTLTSVYDAILEDLVFPAEIVGKRIRVKLDGSQLIKVHLDKSQQTTIEHKVDTFTSVYKKLTGREVTFEFPESYL	3	Cyt		1	23	3	20	3	19	3	XC-contig_81	1e-107	40S ribosomal protein S7	ps	KOG	2e-71	86.9	ribosomal protein S7	1E-085	gi|121512008	319	164	191	98	86	3	0	27	9	1	3	N
cf-contig_172	1	40S ribosomal protein S7	1	Contig-172	Contig172	65.8	.	63.6	577	N	1	P7-1189018_033_H05	577	596	543	PGEPDAFESSISQAPLELEMNSDLKAQLRDLHITRAREIELNNKKSIIIYVPMPKLKAFQKVQTRLVRELEKKFSGNHVVFVGERKILPKPTRKTRTKNKQKRPRSRTLTSVYDAILEDLVFPAEIVGKRIRVKLDGSQLIKVHLDKSQQTTIEHKVDTFTSVYKKLTGREVTFEFPESYL	3	Cyt		1	23	3	20	3	19	3	XC-contig_81	1e-115	40S ribosomal protein S7	ps	KOG	4e-76	94.2	ribosomal protein S7	3E-092	gi|121512008	342	178	191	97	94	4	0	13	9	1	3	N
cf-contig_104	2	40S ribosomal protein S8	2	Contig-104	Contig104	93.	.	60.8	619	N	2	P20-1190281_038_F06	645	638	561	PGERKYELGRPAANTKLGPQRIHLVRTRGGNVKHRALRLDTGNFSWGSECATRKARIIDVVYNASNNELVRTKTLVKNAIVVIDATPFRQWYESHYVLPLGRKRCTKLTPEEEAVMNKKRSKKVAKKYATRQRVAKVEQALEEQFATGRLLAAVSSRPGQCGRADGYILEGKELEFYMRKIKSKKAK	2	Cyt		2	17	3	16	3	15	3	XC-contig_181	5e-73	40S ribosomal protein S8	ps	KOG	1e-81	92	40S ribosomal protein S8 gi|18253055|gb|AAL62472.1| ribosomal protein S8	4E-087	gi|54039568	325	184	208	84	89	28	0	24	8	1	2	N
cf-contig_105	4	40S ribosomal protein S8	4	Contig-105	Contig105	87.6	.	60.4	647	N	4	P10-1189162_041_D05	656	666	588	GRGGKRKPIRKKRKYELGRPAANTKLGPQRIHLVRTRGGNVKHRALRLDTGNFSWGSECATRKARIIDVVYNASNNELVRTKTLVKNAIVVIDATPFRQWYESHYVLPLGRKRGTKLTPEEEAVMNKKRSKKVAKKYATRQRVAKVEQALEEQFATGRLLAAVSSRPGQCGRADGYILEGKELEFYMRKIKSKKAK	3	Cyt		4	17	3	16	3	15	3	XC-contig_181	3e-74	40S ribosomal protein S8	ps	KOG	7e-87	97	40S ribosomal protein S8	1E-093	gi|307203914	347	193	202	88	96	23	0	9	9	1	3	N
cf-contig_106	1	40S ribosomal protein S8	1	Contig-106	Contig106	65.7	.	60.2	642	N	1	P6-1188840_063_A07	642	661	585	PGRQRKPIRKKRKYELGRPAANTKLGPQRIHLVRTRGGDVKHRALRLDTGNFSWGSECAARKARIIDVVYNASNNELVRTKTLVKNAIVVIDATPFRQWYESHYVLPLGRKRGTKLTPEEEAVMNKKRSKKVAKKYATRQRVAKVEQALEEQFATGRLLAAVSSRPGQFGRADGYILEGKELEFYMRKIKSKKAK	2	Cyt		1	17	3	16	3	15	3	XC-contig_181	5e-73	40S ribosomal protein S8	ps	KOG	2e-83	97	ribosomal protein S8e	8E-091	gi|70909499	337	193	201	85	97	28	0	8	5	1	2	N
cf-contig_249	1	40S ribosomal protein SA (P40)/Laminin receptor 1	1	Contig-249	Contig249	33.2	.	50.8	836	N	1	CAFM_P2-047_A05	836	855	732	TSFGEKLLLAARAIADIEHRSYVFVNTSKIYGQRAELKFAALTGATPIVGRFTPGAFTNQIQAAFREPRLLVVSDPQNDHQPITEASYVNIPVIAFCNADSPLRYVDIAIPCNNKSVNSIGLMWWLLAREVLRFKGKIKRDTKWDVVVDLYFYRDPEEAEKEDQVTKEVAAPVPAKPVETDYTAGVAENWPDNGEPAVRPSWGDEPVAAPAAAPLLLPKKATGVPEGEWVTAPQPEEWAGNTNW	1	Cyt		1	197	1	200	1	198	1	XC-contig_115	2e-89	40S ribosomal protein SA (P40)/Laminin receptor 1	ps	KOG	1e-69	91.3	40S ribosomal protein SA gi|121543783|gb|ABM55561.1| putative ribosomal protein	8E-081	gi|229891590	294	266	308	63	87	93	15	34	8	2	1	Y
cf-contig_113	7	60S acidic ribosomal protein P0-like	7	Contig-113	Contig113	81.4	.	64.3	380	N	7	P14-1189515_080_A10	380	400	273	PGQPLLKLNSKKLPQLRNTLRIPASLLLLLLPLQLLLLQHLLNPRKKKRKRNLSLKMMTWVSVSLIKNLFHNINILGNPYLYEYLHIQVCL	2	Ind		7	126	1	121	1	118	1	XC-contig_70	1e-10	60S acidic ribosomal protein P0-like	ps	NR	2e-21	20.5	60S acidic ribosomal protein P0-like	2E-021	gi|156543342	106	64	316	86	21	9	1	252	7	1	1	N
cf-contig_73	13	60S acidic ribosomal protein P1	13	Contig-73	Contig73	85.9	.	55.5	356	N	13	P20-1190299_084_G12	356	380	207	PGLFAKALEGVNVKDLITNIGSGVGSGPAAAAPAAAGGAAAPAAAAKEEKKKESEPEESDDDMGFGLFN	1	Ind		13	32	2	26	2	24	2	XC-contig_70	1e-49	60S acidic ribosomal protein P1	ps	NR	2e-39	82	60S acidic ribosomal protein P1	2E-039	gi|121511986	166	92	113	94	82	5	1	21	7	1	1	N	1.087
cf-contig_74	1	60S acidic ribosomal protein P1	1	Contig-74	Contig74	65.	.	53.9	413	N	1	P19-1190181_006_F02	413	432	339	PGGPKAELACVYSALILVDDDVAVTGEKISTILKAAAVDVEPYWPGLFAKALEGVNVKDLITNIGSGVGSGPAAAAPAAAGGAAAPAAAAKEEKKKESEPEESDDDMGFGLFN	1	Ind		1	32	2	26	2	24	2	XC-contig_70	2e-62	60S acidic ribosomal protein P1	ps	NR	5e-51	97.3	60S acidic ribosomal protein P1	5E-051	gi|121511986	204	109	113	96	97	4	1	4	13	1	1	N
cf-contig_630	1	60S ribosomal export protein NMD3	1	Contig-630	Contig630	63.8	.	70.8	354	N	1	P6-1188911_036_G06	354	373	246	AGEMWKLKHLAQEITELDTGNMDYHEFLDDLEEDPVMRQNINIFRDKTIPVDVDDMDDPSVPRITLEEMLDDLDIQDVEMGE	2	Cyt		1	515	1	527	1	537	1	XC-contig_57	0.0006	60S ribosomal export protein NMD3	ps	NR	3e-22	16	similar to nonsense-mediated mrna decay protein	2E-022	gi|91091920	108	80	503	69	16	25	2	422	11	1	2	N
cf-contig_203	3	60s ribosomal protein L10	3	Contig-203	Contig203	86.5	.	57.9	654	N	3	P5-1188793_056_E08	654	673	603	GRGFCRGVPDAKIRIFDLGKKKAGVEDFPLCVHLVSDEYEQLSSEALEAGRICCNKYLVKNCGKDQFHIRMRLHPFHVIRINKMLSCAGADRLQTGMRGAFGKPQGTVARVHIGQPIMSVRSSDRYKAAVVEALRRAKFKFPGRQKIYVSKKWGFTKYERDVYEKLRDEGRLAPDGCNVQYRPEHGPLSAWKKVQEDLAAC	1	Cyt		3	170	1	172	1	170	1	XC-contig_125	8e-45	60s ribosomal protein L10	ps	KOG	1e-81	90.5	ribosomal protein L10e	1E-104	gi|70909659	380	196	218	90	90	18	0	22	10	1	1	N
cf-contig_232	2	60S ribosomal protein L10A	2	Contig-232	Contig232	81.2	0.2	61.5	597	N	2	P5-1188790_039_E05	597	616	381	KKLNKNKKLVKKLAKKYDAFLASESLIKQIPRLLGPGLNKAGKFPGLLSHQESMVQKIDEVKGTIKFQMKKVLCLSVAVGHVDMSPDELVQNVHLSINFFVSLLKKHWQNVRSLHVKSTMGPPQRLY	1	Cyt		2	57	2	50	2	47	2	XC-contig_181	0.02	60S ribosomal protein L10A	ps	KOG	3e-58	58.2	60S ribosomal protein L10a	6E-074	gi|170571798	213	178	284	78	63	27	0	106	18	2	1	Y
cf-contig_698	1	60S ribosomal protein L11	1	Contig-698	Contig698	63.4	.	64.4	287	N	1	P9-1188514_037_F05	287	306	243	AGGTGNFGFGIQEHIDLGIKYDPSIGIYGLDFYVVLGRPGFNVAHRRRKTGKVGFQHRLTKEDAMKWFQQKYDGIILNSKK	1	Ind		1	94	2	86	2	77	2	XC-contig_236	3e-53	60S ribosomal protein L11	ps	KOG	2e-40	43.7	ribosomal protein L11	7E-040	gi|342356337	167	77	197	100	40	0	0	120	10	1	1	N
cf-contig_753	1	60S ribosomal protein L11	1	Contig-753	Contig753	64.9	.	61.3	474	N	1	P11-1189278_005_F01	474	493	429	PGVLEQLTGQQPVFSKLVIPSDLSVSVVMKKIAVHCTVRGAKAEEILERGLKVREYELRRDNFSGTGNFGFGIQEHIDLGIKYDPSIGIYGLDFYVVLGRPGFNVAHRRRKTGKVGFQHRLTKEDAMKWFQQKYDGIILNSKK	3	Cyt		1	94	2	86	2	77	2	XC-contig_236	2e-84	60S ribosomal protein L11	ps	KOG	4e-65	79.5	ribosomal protein L11	8E-065	gi|342356337	249	140	197	89	72	15	0	57	9	1	3	N
cf-contig_239	3	60S Ribosomal protein L13	3	Contig-239	Contig239	77.1	.	59.1	734	N	3	P8-1189111_002_H02	748	753	666	SKMGKGNNMIPNGHFHKDWQRFVKTWFNQPARKIRRRQNRIKKARALFPRPAAGPLRPIVHCPTVRYHTKVRAGRGFTLEEIRGAGLNAGFARSIGIALDVRRRNKSVESLQQNIQRLKEYRSKLILFPRGGKKLHKGEATEEECKVASQLEGVVMPIKQTSVKSKARVITEDEKKFSAFTTLRKARADQRLVGIREKRVKDAAENPDDVTKVGKEGKKAKK	1	Cyt		3	188	1	191	1	189	1	XC-contig_71	1e-135	60S Ribosomal protein L13	ps	KOG	7e-83	98.5	ribosomal protein L13	1E-108	gi|121511988	396	220	221	88	100	25	1	1	37	1	1	N
cf-contig_231	3	60S ribosomal protein L13a-like	3	Contig-231	Contig231	87.7	.	60	419	N	3	P4-1188725_084_G12	411	438	375	RPGWETVRGMVPHKTERGKQALRRLKAYEGCPAPFDRRKRLVVPKAMRVMCLKPGRKYCHVGRLSNEVGWKYQDVVRTLENKRRVKTILNIKKRNNLKKLTKKAGEAVAKRVAPYTQVINSYGYN	3	Cyt		3	183	1	186	1	184	1	XC-contig_28	0.17	60S ribosomal protein L13a-like	ps	NR	1e-54	59	60S ribosomal protein L13a-like	1E-054	gi|156544548	216	121	204	80	60	24	0	83	12	1	3	N
cf-contig_118	6	60s ribosomal protein L15	6	Contig-118	Contig118	87.1	0.2	56.9	520	N	6	P18-1190049_012_C02	521	540	474	AGDVXGYRAKQGYVIFRIRVRRGGRKRPVPKGATFGKPKSHGVNQLKPTRNLQSVAEERVGRRCGGLRVLNSYWVAQDSSYKYFEVILVDPSHNAIRRDPKANWICNAVHKHREMRGLTSAGKSSRGLGKGHRYSQTIGGSRRAAWLRRNSLQLRRKR	1	Cyt		6	127	1	122	1	119	1	XC-contig_100	1e-105	60s ribosomal protein L15	ps	KOG	3e-82	75	ribosomal protein L15	1E-079	gi|315115481	299	152	204	93	75	10	0	52	16	1	1	N
cf-contig_119	1	60s ribosomal protein L15	1	Contig-119	Contig119	61.4	.	58.1	191	N	1	P8-1189044_061_B07	191	210	147	PGAREMRGLTSAGKSSRGLGKGHRYSQTIGGSRRAAWLRRNSLQLRRKR	2	Cyt		1	128	1	123	1	120	1	XC-contig_100	5e-28	60s ribosomal protein L15	ps	KOG	7e-19	22.5	ribosomal protein L15e	1E-016	gi|70909715	90.1	45	130	93	35	3	0	85	11	1	2	N
cf-contig_153	5	60S ribosomal protein L18a	5	Contig-153	Contig153	79.6	.	58.4	342	N	5	P9-1188512_021_F03	345	365	300	PGIWLRYDSRSGTHNMYREYRDLTVGGAVTQCYRDMGARHRARAHSIQVIKVEEVKAANCRRPQVTQFHDAKIRFPLPKRVQQRNLMPKFSVRKPRTFFL	1	Cyt		5	144	1	141	1	138	1	XC-contig_219	0.074	60S ribosomal protein L18a	ps	NR	7e-48	55.9	60S ribosomal protein L18a	7E-048	gi|149898903	193	98	177	90	56	9	0	79	4	1	1	N
cf-contig_121	6	60s ribosomal protein L19	6	Contig-121	Contig121	90.1	0.2	62.9	447	N	6	P15-1189774_025_D03	447	466	399	AGPEGKVXHSGFGKRKGTANARTPQKDLWVQRMRVLRRLLKKYREAKKIDRHLYHALYMKAKGNVFKNKRVLMEYIHKKKAEKARTKMLNDQAEARRTKVREARKRREERIATKKQELLQTYAKEDEAAATKK	2	Cyt		6	130	1	125	1	122	1	XC-contig_90	8e-79	60s ribosomal protein L19	ps	KOG	1e-53	61.6	ribosomal protein L19	9E-062	gi|121512020	239	124	189	96	66	4	0	58	17	1	2	N
cf-contig_108	1	60s ribosomal protein L2/L8	1	Contig-108	Contig108	33.	.	59.3	905	N	1	P4-1188685_058_D08	905	924	522	AGQFVYCGKKANLQIGNVMPVGAMPEGTIVCNLEEKTGDRGRLARASGNYATVIAHNPDTKKTRVKLPSGAKKVMPSNNRAMVGIVSGGGRIDKPILKAGRAYHKYKVKRNCWPKVRGVAMNPVEHPHGGGNHQHIGKASTVKRGTSAGRKIGLIAARRTGRIRGGKTDSKKDD	1	Cyt		1	40	2	33	2	31	2	XC-contig_170	1e-118	60s ribosomal protein L2/L8	ps	KOG	2e-91	68.5	60S ribosomal protein L8	3E-094	gi|307200174	349	172	257	96	67	6	0	85	4	1	1	N
cf-contig_469	1	60S ribosomal protein L21	1	Contig-469	Contig469	62.4	.	67.8	195	N	1	P19-1190121_016_A02	195	214	129	HEAKEKKVHVTLKRQPAQPRPANIVKGTDEPIRLAPIPYEFIA	2	Ind		1	381	1	390	1	395	1	XC-contig_106	0.45	60S ribosomal protein L21	ps	NR	2e-11	30.1	60S ribosomal protein L21	2E-011	gi|156536951	72.8	47	159	75	30	12	0	112	14	1	2	N	2.128
cf-contig_150	5	60S ribosomal protein L22	5	Contig-150	Contig150	72.7	.	57.3	635	N	5	P14-1189547_042_D06	635	654	462	DRNGNQKMQLRRAVRYLKNVIEQKECIPFRRFNGGVGRCAQAKQFGTTQGRWPKKSAEFLLQLLRNAESNADYKGLDVDRLHIDHIQVNRAPCLRRRTYRAHGRINPYMSSPCHIEVCLVEKEEAVAKAPEEEPAKKKLSKKKLARQKEKMMRE	1	Cyt		5	141	1	138	1	135	1	XC-contig_79	7e-39	60S ribosomal protein L22	ps	KOG	6e-56	81.7	ribosomal protein L17	1E-088	gi|342356333	276	186	187	89	100	16	2	1	38	2	1	Y
cf-contig_420	1	60S ribosomal protein L22-like	1	Contig-420	Contig420	64.9	.	62.6	460	N	1	P16-1189901_070_F10	460	479	249	EVAAKKGPVQTGKKQQLRGKGLKKKKVSLKFTVDCTTPVEDNIMDVQNFKKYLQERIKVNGKTNNFGNNVSLECQKNESVCHL	3	Cyt		1	342	1	351	1	354	1	XC-contig_141	0.025	60S ribosomal protein L22-like	ps	NR	2e-45	48.2	60S ribosomal protein L22-like	2E-045	gi|156553855	106	128	141	77	91	15	0	13	27	2	3	Y
cf-contig_180	3	60S ribosomal protein L26	3	Contig-180	Contig180	87.4	.	62.9	550	N	3	P6-1188914_067_G09	550	569	453	IKMKFNKLVTSSRSKNRKRHFTAPSHVRRALMTSPLSKELRQKYNVRSMPIRKDDEVQVVRGHFKGQQVGKVVQVYRKKFVVYIERIQREKANGNSVYVGIHPSKCVIVKLKMDRDRKKIIDRRAKGRLAALGKDKSKYTEETSGSTMEVQ	3	Cyt		3	47	2	40	2	37	2	XC-contig_72	0.44	60S ribosomal protein L26	ps	KOG	7e-62	97.2	similar to ribosomal protein L26e	2E-068	gi|91093619	262	144	150	88	97	16	0	1	57	1	3	N
cf-contig_363	1	60S ribosomal protein L3 - signalP detected	1	Contig-363	Contig363	63.6	.	64.5	277	N	1	P14-1189552_089_D11	277	296	222	GRGTKKRVITMRKSLLVHTKRIALEKVNLKFIDTSSKFGHGRFQTPADKFSFMGVLKKDRVNEETTAAQPTAST	2	SIG	3,	1	292	1	299	1	300	1	XC-contig_204	3e-45	60S ribosomal protein L3 - signalP detected	ps	KOG	5e-24	16.9	ribosomal protein L3e	6E-024	gi|342906226	114	65	87	83	76	11	0	22	8	1	2	N
cf-contig_209	3	60S ribosomal protein L31	3	Contig-209	Contig209	75.4	.	62.3	276	N	3	P5-1188802_037_F05	296	297	237	TAGVCRKQMGTPDVRVDTRLNKQLWSKGIRNVPFRIRVRLARRRNDDEDSANKLYTLVAYVPVATFKGLQTENVDASQE	2	Cyt		3	172	1	174	1	172	1	XC-contig_164	3e-52	60S ribosomal protein L31	ps	NR	1e-32	59.3	60S ribosomal protein L31	1E-032	gi|307176321	143	72	123	91	59	6	0	51	20	1	2	N
cf-contig_163	5	60S ribosomal protein L32	5	Contig-163	Contig163	85.7	.	61.7	407	N	5	P16-1189885_040_E06	432	428	363	PGDEKFIRHQSDRYDKLKRNWRKPKGIDNRVRRRFKGQFLMPNIGYGSNSKTRHMLPTGFHKVLVHNTKELEILMMQNRTYCAEIAHGVSSKKRKEITERAKQLSIRVTNGNARLRSQENE	2	Cyt		5	148	1	148	1	145	1	XC-contig_118	0.047	60S ribosomal protein L32	ps	KOG	1e-53	86.2	similar to ribosomal protein L32e	2E-056	gi|91087871	222	117	134	89	88	12	0	17	11	1	2	N
cf-contig_125	6	60S ribosomal protein L34	6	Contig-125	Contig125	88.6	.	64.7	282	N	6	CAFL_P1-077_B09	298	312	231	GCGQCKDKLRGIQPARPMERSRMCRRKKTVRRSYGGVLCHKCVKERIVRAFLIEEQKIVVKVLKAQQASVKAAKKDK	3	Cyt		6	132	1	128	1	125	1	XC-contig_244	1e-54	60S ribosomal protein L34	ps	NR	3e-32	63.8	60S ribosomal protein L34	3E-032	gi|307195690	141	75	119	89	64	8	0	44	6	1	3	N
cf-contig_240	3	60S ribosomal protein L37	3	Contig-240	Contig240	47.9	.	69.1	787	N	3	P5-1188771_076_C10	787	806	285	SKMTKGTSSFGKRRNKTHTLCRRCGRSSYHIQKSQCAQCGYPFAKLRSYNWSIKAKRRKTTGTGRMRHLKIVRRRFRNGFREGGKPSPKQVPSTT	1	Cyt		3	189	1	192	1	190	1	XC-contig_108	8e-63	60S ribosomal protein L37	ps	KOG	4e-46	97.8	ribosomal protein L37	5E-045	gi|121511940	186	91	92	92	100	7	0	1	103	1	1	N
cf-contig_154	5	60S ribosomal protein L5	5	Contig-154	Contig154	82.	.	67.4	500	N	5	P7-1188946_045_B05	377	519	300	RPGVADYMKSLEEEDEDAFKRQFSKYISLGITADNIEELYKKAHATIRADPSLKPADKMKAADVKVKRWNRAKLSLSERKNRVAQKKASWLQKLKAENEA	3	Cyt		5	145	1	142	1	139	1	XC-contig_144	0.11	60S ribosomal protein L5	ps	SWISSP	4e-29	32.4	hypothetical protein	2E-028	gi|346468321	129	90	298	69	31	28	0	204	12	1	3	N
cf-contig_107	6	60S ribosomal protein L8 Harpegnathos saltator	6	Contig-107	Contig107	79.7	.	57.3	752	N	6	P12-1189383_070_F10	752	770	705	GRGGPKLRSLDFAERHGYIKGVVKDIIHDPGRGAPLAMVHFRDPYKFKTRKELFIAPEGMYTGQFVYCGKKANLQIGNVMPVGAMPEGTIVCNLEEKTGDRGRLARASGNYATVIAHNPDTKKTRVKLPSGAKKVMPSNNRAMVGIVSGGGRIDKPILKAGRAYHKYKVKRNCWPKVRGVAMNPVEHPHGGGNHQHIGKASTVKRGTSAGRKIGLIAARRTGRIRGGKTDSKKDD	2	Cyt		6	40	2	33	2	31	2	XC-contig_170	1e-162	60S ribosomal protein L8 Harpegnathos saltator	ps	NR	0	91	60S ribosomal protein L8	1E-130	gi|307200174	470	233	257	95	91	10	0	24	5	1	2	N
cf-contig_566	1	60S ribosomal protein L9	1	Contig-566	Contig566	53.1	.	65	184	N	1	P4-1188644_031_A03	184	203	159	AGGRADLGRNPLEDVSKSAALIQQSTTVKNKDIRKFLDGLYVSEKTTVVQDEI	2	Ind		1	462	1	472	1	479	1	XC-contig_232	3e-24	60S ribosomal protein L9	ps	SWISSP	3e-14	23.1	60S ribosomal protein L9-like	1E-013	gi|345492503	80.1	42	130	93	33	3	0	87	29	1	2	N
cf-contig_589	1	Alanyl-tRNA synthetase	1	Contig-589	Contig589	51.	.	68.4	832	N	1	P5-1188748_095_A11	832	851	768	RPLRPGLSKKPRCGTHILNTKHLEEFSITKFQNLSRSNMVFYGATGHKAKDVLENSKLIENKVETLQKRITENNTTKSCINELKSEINNTTLSYVTKMQSLEIIDDLIKSSNQFQYQNLKDFIDVEMKDVMDSLKANKGSFLVHNLICASLMENVKLDKVTRYCKDKPVIIFSYSNGYVKARCCVPEDCTSESFNAQKWLKISADIFKAHVGPPKGQNENFICNMKAKKILEPEWYDLLEKAVQLSNEYAKVHINK	3	Cyt		1	480	1	491	1	500	1	XC-contig_42	0.016	Alanyl-tRNA synthetase	ps	KOG	3e-19	26.9	hypothetical protein TcasGA2_TC010044	7E-045	gi|270010617	185	260	977	36	27	166	13	717	21	1	3	N
cf-contig_21	71	Anopheles funestus 16S ribosomal RNA partial sequence; mitochondrial	71	Contig-21	Contig21	91.7	.	77.6	595	N	71	P16-1189871_026_D04	597	629	156	IMIKRLSYLRDNSVIIFKRTYRQNRLRPRCWIKIILKCRSFKIWSVRPLILT	1	Cyt		71	99	1	91	1	83	1	XC-contig_47	1e-77	Anopheles funestus 16S ribosomal RNA partial sequence; mitochondrial	ps	RRNA	3e-45	14.7	hypothetical protein	9E-012	gi|133916482	74.7	47	53	72	91	13	0	1	328	1	1	N
cf-contig_507	1	Arginyl-tRNA synthetase	1	Contig-507	Contig507	65.7	.	70.3	615	N	1	P20-1190289_004_G02	615	634	531	RAVLTPQQLKAAQESVAYGCIKYADLSHNRNLEYVFSFDRMLEDKGNTAAYILYQYTRISSIARNANVIREQIIQAAENIDVSLEHPKEWKLGKVLLKFPDVLIKITHDLFLHHLCEYMYEVATSFSEFYDNCYCIEKNKAGEIVKVNMNRLMLCELTAMTLIKCFDILGLKLVSFM	3	Cyt		1	414	1	423	1	428	1	XC-contig_147	1.3	Arginyl-tRNA synthetase	ps	KOG	5e-68	26.8	arginyl-tRNA synthetase, cytoplasmic-like	8E-067	gi|350420346	257	174	674	69	26	54	0	500	9	1	3	N
cf-contig_374	1	Drosophila persimilis ribosomal RNA (Dper/28SrRNA:GL28069) rRNA	1	Contig-374	Contig374	62.6	.	43.5	455	N	1	P14-1189591_002_H02	455	474	192	RAGPGRGETVLVTWIRARSRALAPRGSFLLRGFCAGFGRSVVLFGRHSTVSSELARTRGIRLSN	2	Ind		1	303	1	310	1	311	1	XC-contig_78	0.68	Drosophila persimilis ribosomal RNA (Dper/28SrRNA:GL28069) rRNA	ps	RRNA	9e-48	2	hypothetical protein EAG_03557	5E-032	gi|307185262	140	100	306	72	33	28	3	13	24	1	-2	N
cf-contig_114	3	elongation factor 1-alpha	3	Contig-114	Contig114	88.8	.	59.2	641	N	3	P16-1189894_021_F03	635	660	345	PGGQISNGYTPVLDCHTAHIACKFAEIKEKVDRRTGKSTEDNPKAIKSGDAAIVTLVPSKPMCVESFQEFPPLGRFAVRDMRQTVAVGVIKSVNFKDASGGKVTKAAEKATKGKK	1	Cyt		3	10	4	9	4	7	4	XC-contig_120	3e-91	elongation factor 1-alpha	ps	NR	7e-56	48	elongation factor 1-alpha	7E-056	gi|255710199	221	112	233	95	48	5	0	121	7	1	1	N
cf-contig_115	2	elongation factor 1-alpha	2	Contig-115	Contig115	83.2	.	60.7	556	N	2	P11-1189228_095_A11	595	575	261	EKVDRRTGKSTEDNPKAIKSGDAAIVTLVPSKPMCVESFQEFPPLGRFAVRDMRQTVAVGVIKSVNFKDASGGKVTKAAEKATKGKK	3	Cyt		2	10	4	9	4	7	4	XC-contig_120	2e-71	elongation factor 1-alpha	ps	NR	2e-39	37.3	elongation factor 1-alpha	2E-039	gi|255710199	166	86	233	94	37	5	0	147	3	1	3	N
cf-contig_116	1	elongation factor 1-alpha	1	Contig-116	Contig116	63.1	.	59.5	616	N	1	CAFL_P1-067_G09	616	635	330	SNGYTPVLDCHTAHIACKFAEIKEKVDRRTGKSTEDNPKAIKSGDAAIVTLVPSKPMCVESFQEFPPLGRFVVRDMRQTVAVGVIKSVNFKDASGGKVTKAAEKATKGKK	1	Cyt		1	10	4	9	4	7	4	XC-contig_120	1e-88	elongation factor 1-alpha	ps	NR	1e-53	47.2	elongation factor 1-alpha	1E-053	gi|255710199	214	109	233	94	47	6	0	124	1	1	1	N
cf-contig_745	1	eukaryotic translation initiation factor 2 subunit 2-like	1	Contig-745	Contig745	64.3	.	62.4	391	N	1	P11-1189251_076_C10	391	410	264	AGGSVDGNSQLIIKGRFQQKQIENVLRRYIKEYVTCHTCRSPDTILQKDSRLFFLQCESCGSRCSVASIKSGFQAVTGKRAAIRAKTA	1	Ind		1	600	1	619	1	633	1	XC-contig_110	0.003	eukaryotic translation initiation factor 2 subunit 2-like	ps	NR	2e-41	27.2	eukaryotic translation initiation factor 2 subunit 2-like	2E-041	gi|350424155	172	85	316	97	27	2	0	231	7	1	1	N
cf-contig_598	1	Filamentous baseplate protein Ligatin contains PUA domain	1	Contig-598	Contig598	62.5	.	65	504	N	1	P5-1188780_057_D07	504	523	423	GGLVIRHYGRGTSAEALEWPRLLEKIESRMTPIFEMKSGSQTIQCKGKAPIVVLTVSKRAGNKKVTLVDNLELFGINLLEFSKDCQLGVATSTSINKSSDKKGDQVLIQGNQVAFIGKLLTDKYKIPKKYIRGLELAVKKK	1	Cyt		1	486	1	498	1	507	1	XC-contig_181	0.4	Filamentous baseplate protein Ligatin contains PUA domain	ps	KOG	1e-26	22	hypothetical protein TcasGA2_TC001461	4E-031	gi|270015596	138	124	538	52	23	59	0	414	49	1	1	N
cf-contig_204	2	Glutaminyl-tRNA synthetase	2	Contig-204	Contig204	80.6	.	69.3	261	N	2	P10-1189176_055_E07	267	280	219	GIQKKYLGGFLTDCREDTLKEIQSMGGVSIKSAKVYDKYQFERVGFFSVDPDTTESTLIFNRTVSLKEDSGKQ	2	Cyt		2	50	2	43	2	40	2	XC-contig_207	0.19	Glutaminyl-tRNA synthetase	ps	KOG	6e-18	8.5	glutaminyl-trna synthetase	5E-017	gi|157167670	91.3	64	782	63	8	24	0	717	23	1	2	N
cf-contig_205	1	Glutaminyl-tRNA synthetase	1	Contig-205	Contig205	60.4	.	66.2	507	N	1	CAFL_P1-088_E12	507	526	465	TDFTETPDKGYRRLTPNQAVGLRYAGFVIAVKEVKKDSTGKVYEVVCTCEKSETASKPKAFIHWVSHPVNVTVRLYEMLFKHRNPEEVPGGFLTDCREDTLKEIQAMGDASIKSAKVYDKYQFERVGFFSVDPDTTESTLIFNRTVSLKEDSGKQ	2	Cyt		1	50	2	43	2	40	2	XC-contig_94	0.22	Glutaminyl-tRNA synthetase	ps	KOG	4e-54	20.4	glutaminyl-trna synthetase	7E-055	gi|157167670	217	156	782	65	20	54	3	625	2	1	2	N
cf-contig_385	1	Glycyl-tRNA synthetase	1	Contig-385	Contig385	65.8	.	72	539	N	1	P15-1189761_012_C02	539	558	249	GGSIGRRYARTDEIAIPYGITIDFDTLTTDSVTLRERDSMGQVRVPLSEIADVVRDLSQSKTSWKDVEQKYPKFEAQEANKTE	2	Cyt		1	313	1	321	1	322	1	XC-contig_226	0.23	Glycyl-tRNA synthetase	ps	KOG	2e-22	10.6	glycyl-tRNA synthetase-like	1E-025	gi|350425387	120	82	741	71	11	24	1	659	5	1	2	N
cf-contig_560	1	Mitochondrial/chloroplast ribosomal protein L24	1	Contig-560	Contig560	60.5	.	66.2	670	N	1	P3-1188623_036_G06	670	689	471	KYLVGKDKGKHGIIVQIFQERNWVIVEGLNCYLKTVGKDKNFPGITIKQEAPLLVTSEVALVDPTDLKSGPVEWRYTEEGEKVRVSVRTGRIIPIPKIASETFDYKTPSAHIEQPKDTTADAASQITFQPMLKTFEMDIMDKMGIKEDRVPGKTYWY	3	Ind		1	457	1	467	1	474	1	XC-contig_5	0.022	Mitochondrial/chloroplast ribosomal protein L24	ps	KOG	7e-52	67.3	hypothetical protein AND_14210	4E-059	gi|312375398	228	164	241	67	68	50	0	77	35	2	3	Y
cf-contig_453	1	Mitochondrial/chloroplast ribosomal protein S11	1	Contig-453	Contig453	63.	.	64.7	213	N	1	P18-1190050_027_C03	213	232	159	AGDQKVRVRISGLGPGRMSSIKGLQMGGLDIVSITDATRVSWNPPRPRKQKKL	1	Ind		1	367	1	376	1	381	1	XC-contig_184	0.5	Mitochondrial/chloroplast ribosomal protein S11	ps	KOG	5e-17	27.3	similar to AGAP003644-PA	1E-015	gi|91087153	86.7	51	204	78	25	11	0	153	4	1	1	N
cf-contig_201	2	Polyadenylate-binding protein (RRM superfamily) - signalP detected	2	Contig-201	Contig201	72.4	.	52.5	591	N	2	CAFM_P2-049_H07	590	610	498	RPMGWEAQLLQALVVQVPTSTHRTCAIHLKCWLLQMLKLLSLNRQCWYKAKNHSPLPCLPQHRLMNRNRCLESDYSLLFRECTLTWPARSPVCFLRSTILNSCTCWSITKVLKPRWRKLLLYYRHIKQSKPRLRTVRLRRSKEPHDKLPAINFPWLHLFATLLAVS	2	BL		2	49	2	42	2	39	2	XC-contig_89	1.7	Polyadenylate-binding protein (RRM superfamily) - signalP detected	ps	KOG	4e-08	33.8	polyadenylate-binding protein 1-like isoform 1	1E-045	gi|328782034	187	136	601	72	23	39	3	465	1	1	1	N
cf-contig_738	1	Protein required for 18S rRNA maturation and 40S ribosome biogenesis - signalP detected	1	Contig-738	Contig738	64.2	.	67.4	205	N	1	P11-1189230_013_B01	205	224	150	GHLLMELPLLIMQKKQFLSAIILYQLHLHAVNCVQHLKRCGVCVNSNYQT	3	SIG	3,	1	598	1	614	1	628	1	XC-contig_119	0.012	Protein required for 18S rRNA maturation and 40S ribosome biogenesis - signalP detected	ps	KOG	3e-16	19	unnamed protein product	5E-014	gi|47221585	81.3	46	237	74	20	12	0	190	2	1	2	N
cf-contig_541	1	Protein SEC13 homolog - mRNA transport - COPII vesicle coating - cellular protein metabolic process - post-translational protein modification -	1	Contig-541	Contig541	64.5	.	65.5	369	N	1	P3-1188548_031_A03	369	388	315	GRGVRDVAWAPSIGLPRSQIASCSQDRRVVIWTSDDTHSNWTPIVLNTFDDVVWNVSWSLTSNILAVSGGDNKVSLWRENNEGQWCCISEVNKGQGQISTEQRAL	2	Ind		1	443	1	453	1	459	1	XC-contig_76	0.54	Protein SEC13 homolog - mRNA transport - COPII vesicle coating - cellular protein metabolic process - post-translational protein modification -	ps	GO	2e-37	30.1	protein transport protein sec13, putative	1E-043	gi|242017223	179	254	361	82	71	18	1	107	11	2	2	N
cf-contig_162	5	Ribosomal L37ae protein family	5	Contig-162	Contig162	81.1	.	63.9	293	N	5	P13-1189435_012_C02	300	319	252	GITGKYGTRYGASLRKMVKKMEITQHAKYTCTFCGKDAMKRSCVGIWSCKRCKRTVAGGAWVYTTTAAASVRSAVRRLRETKEQ	3	Cyt		5	147	1	147	1	144	1	XC-contig_231	6e-58	Ribosomal L37ae protein family	ps	PFAM	2e-42	92.2	60S ribosomal protein L37a	2E-040	gi|169931071	168	83	92	92	91	6	0	9	3	1	3	N
cf-contig_213	3	Ribosomal L38e protein family	3	Contig-213	Contig213	85.8	.	66.3	334	N	3	P17-1189985_072_E10	361	353	234	HLQIEGDKMPREIKEIKDFLLKARRKDAKSVKIKKNPDNVKFKVRCSRFLYTLVITDKEKAEKLKQSLPPGLQVKEVK	3	Cyt		3	174	1	176	1	174	1	XC-contig_223	1e-42	Ribosomal L38e protein family	ps	PFAM	8e-35	100	ribosomal protein L38	5E-031	gi|344190581	137	68	69	100	100	0	0	1	57	1	3	N
cf-contig_233	1	ribosomal protein L10A Bombyx mori	1	Contig-233	Contig233	62.6	.	64.9	323	N	1	P3-1188549_032_A04	323	342	276	RGLTRQVNSLGLLSHQESMVQKIDEVKGTIKFQMKKVLCLSVAVGHVDMSPDELVQNVHLSINFLVSLLKKHWQNVRSLHVKSTMGPPQRLY	3	Cyt		1	57	2	50	2	47	2	XC-contig_74	0.093	ribosomal protein L10A Bombyx mori	ps	NR	2e-38	41.9	ribosomal protein L10A	2E-038	gi|112983523	162	90	217	87	42	11	0	127	6	1	3	N
cf-contig_109	7	ribosomal protein L14 Tribolium castaneum	7	Contig-109	Contig109	92.1	0.2	59.4	565	N	7	P10-1189149_028_C04	588	586	528	TAGGLXGNVHSFRSEMVFQRFVETGRVALISDGPNKGKLISIVDVIDQTRVLVDGPCSGVPRQALRINQLHLTKFNIKFPYLGSTRVVRKAWTDAKVDEKWAESMWARKLAAKQARANMGDFDRFKLRKARQRRNRLRTVAFNCLRKTAARNGSLFGKGTATKGGDKPKPKKVVKK	2	Cyt		7	122	1	117	1	114	1	XC-contig_155	0.036	ribosomal protein L14 Tribolium castaneum	ps	NR	2e-62	94	similar to ribosomal protein L14	2E-062	gi|91079965	242	156	167	71	94	44	0	1	47	1	2	N
cf-contig_196	4	ribosomal protein L23e Tribolium castaneum	4	Contig-196	Contig196	90.8	.	59.8	342	N	4	P9-1188498_007_E01	352	361	294	PGIGGRLNRLPAAGSGDMIVATVKKGKPELRKKVMPAVVIRQRKPFRRRDGVFIYFEDNAGVIVNNKGEMKGSAITGPVAKECADLWPRIASNASSIA	1	Cyt		4	167	1	169	1	167	1	XC-contig_121	1e-27	ribosomal protein L23e Tribolium castaneum	ps	NR	5e-48	69.2	similar to ribosomal protein L23e	5E-048	gi|91085777	194	96	140	98	69	1	0	44	4	1	1	N
cf-contig_587	1	ribosomal protein L24	1	Contig-587	Contig587	61.9	.	57.6	337	N	1	P5-1188739_016_A02	337	356	276	YGRGVDKKRTRRTQKFQRAIVGASLNDILAKRNMKPEVRKAQRDQAIRAAKEQKKSTKAAKKAAAPPKVKAPPKAKAAKVSQKAAPRVGGKR	1	Cyt		1	478	1	489	1	498	1	XC-contig_88	0.35	ribosomal protein L24	ps	NR	5e-36	56.1	ribosomal protein L24	5E-036	gi|342356329	154	86	155	93	56	6	1	69	19	1	1	N
cf-contig_181	1	ribosomal protein L26e	1	Contig-181	Contig181	65.1	.	66.6	283	N	1	CAFL_P1-072_E10	283	302	243	KVVQVYRKKFVVYIERIQREKANGNSVYVGIHPSKCVIVKLKMDRDRKKIIDRRAKGRLAALGKDKGKYTEETSGSTMEVQ	1	Ind		1	47	2	40	2	37	2	XC-contig_112	0.28	ribosomal protein L26e	ps	NR	2e-32	53	ribosomal protein L26e	2E-032	gi|70909801	142	78	149	89	53	8	0	69	1	1	1	N
cf-contig_243	2	ribosomal protein L27A	2	Contig-243	Contig243	70.	.	64.3	283	N	2	P16-1189921_034_H06	283	311	219	TNWWTLVSEQTRLKYKDNVEGKAPVIDIVKAGYYKLLGKGRLPQQPVIVKAKYFSKSAEDKIKAVGGACVLSA	1	Ind		2	192	1	195	1	193	1	XC-contig_82	2e-42	ribosomal protein L27A	ps	NR	2e-30	47	ribosomal protein L27A	2E-030	gi|264667411	135	69	148	94	47	4	0	79	22	1	1	N
cf-contig_595	1	ribosomal protein L27e	1	Contig-595	Contig595	65.5	.	62.6	334	N	1	P5-1188776_025_D03	334	353	288	HALVAGIDRYPRKVHKRMGKAKLHKRSKIKPFIKVLNYNHLMPTRYTVDLSLEHKPTVKDLKDPMKRKKARFQTRVKFEERYKSGKNKWFFQKLRF	3	Cyt		1	87	2	81	2	73	2	XC-contig_245	6e-12	ribosomal protein L27e	ps	NR	3e-45	71.1	ribosomal protein L27e	3E-045	gi|70909807	185	95	135	88	71	11	0	40	3	1	3	N
cf-contig_780	1	ribosomal protein L27e	1	Contig-780	Contig780	65.4	.	60.8	402	N	1	P13-1189474_037_F05	402	421	354	GRGRKAIVTQNFDDGTSEKQYGHALVAGIDRYPRKVHKRMGKAKLHKRSKIKPFIKVLNYNHLMPTRYTVDLSLEHKPTVKDLKDPMKRKKARFQTRVKFEERYKSGKNKWFFQKLRF	2	Cyt		1	87	2	81	2	73	2	XC-contig_245	7e-12	ribosomal protein L27e	ps	NR	3e-55	85.9	ribosomal protein L27e	3E-055	gi|70909807	218	115	135	87	86	15	0	20	8	1	2	N
cf-contig_177	4	ribosomal protein L28e	4	Contig-177	Contig177	87.2	.	63.1	488	N	4	CAFL_P1-050_H08	467	507	420	NEAKMSAHLSWMIVRNNNAFLKKKRNINKPFSSEPNNLTNLSSFRYNGFVHKKTVGVVPADKGGFTVVYKKPKCQHRPAKATVKRTMKSGPRRSLHKLRNLLNANGYRSDLTKVALRRASAVLRSQKPVPEKKKASKKME	1	Cyt		4	156	1	158	1	156	1	XC-contig_79	0.11	ribosomal protein L28e	ps	NR	2e-53	100	ribosomal protein L28e	2E-053	gi|70909829	212	136	137	75	100	34	1	1	43	1	1	N
cf-contig_396	1	ribosomal protein L29	1	Contig-396	Contig396	52.7	.	62.2	230	N	1	P15-1189797_006_F02	230	249	228	GGLGIRPLRPGHRNGIKKPKRYRHESTMGMDAKFLKNQRFSKKHNLKPAAQLKRAAERKAKAAKKKNKCIVINKFC	1	Cyt		1	323	1	331	1	332	1	XC-contig_97	6e-34	ribosomal protein L29	ps	NR	2e-22	81.6	ribosomal protein L29	2E-022	gi|121512028	109	57	71	89	82	6	0	14	25	1	1	N
cf-contig_214	2	ribosomal protein L30	2	Contig-214	Contig214	78.2	.	62.3	342	N	2	P8-1189045_062_B08	339	361	306	VINSRLALVMKSGKYCLGYKQTLKTLRQGKPKLVIIANNTPPLRKSEIEYYAMLAKTGVHHYTGNNIELGTACGKHFRVCTLSITDPGDSDIIRTLPEAQQQ	2	Cyt		2	53	2	46	2	43	2	XC-contig_78	0.016	ribosomal protein L30	ps	NR	2e-47	88	ribosomal protein L30	2E-047	gi|22758848	192	100	114	93	89	7	0	14	5	1	2	N
cf-contig_215	1	ribosomal protein L30	1	Contig-215	Contig215	57.6	.	63.6	294	N	1	P14-1189590_001_H01	294	313	261	AGGYKQTLKTLRQGKAKLSTIANNTPPLRKSEIDYYAMLAKTGVHHYTGNNIELGTACGKYFRVCTLSITDPGDSDIIRTLPEAQQQ	1	Cyt		1	53	2	46	2	43	2	XC-contig_78	0.098	ribosomal protein L30	ps	NR	6e-39	74.5	ribosomal protein L30	6E-039	gi|22758848	164	84	114	91	75	7	0	30	7	1	1	N
cf-contig_186	4	ribosomal protein L35	4	Contig-186	Contig186	75.3	.	63.4	442	N	4	P14-1189522_045_B05	442	462	399	PGWRVLSRNKMGKVKCSELRTKDKKELTKQLEELKTELTSLRVAKVTGGAASKLSKIRVVRKAIARVYIVIHQKTKENLRKFYKDKKYKPLDLRPKKTRAIRRALSKHELRLKTMKEIRKKSIFPPRKFALKA	3	Cyt		4	161	1	163	1	161	1	XC-contig_98	1e-83	ribosomal protein L35	ps	NR	3e-61	100	ribosomal protein L35	3E-061	gi|121512030	238	122	123	100	100	0	0	1	33	1	3	N
cf-contig_182	4	ribosomal protein L35Ae Tribolium castaneum	4	Contig-182	Contig182	69.	.	60.9	462	N	4	CAFL_P1-066_H10	468	489	396	KKTKAPKGEPVALKRRPFKRHGRLYAKAIFTGYKRGLRNQHENTALLKVEGCGTKADSWFYVGKRCVFVYKAKNKTCVPGKPKKVKSKVRAIWGKVTRPHGCSGCVRAKFHRNLPAKAMGHRVRIMLFPSRI	3	Ind		4	157	1	159	1	157	1	XC-contig_28	0.056	ribosomal protein L35Ae Tribolium castaneum	ps	NR	9e-59	95	similar to ribosomal protein L35Ae	9E-059	gi|91094995	229	136	143	81	96	25	5	7	18	1	3	N
cf-contig_99	8	Ribosomal protein L36e	8	Contig-99	Contig99	84.	.	64	184	N	8	P6-1188861_028_C04	183	203	156	AGGLLKVSKDKRALKFLKRRLGTHIRAKRKREELSNILTQMRKAHAAATHTK	1	Ind		8	117	1	112	1	109	1	XC-contig_189	2e-29	Ribosomal protein L36e	ps	PFAM	7e-21	41.4	ribosomal protein L36A	1E-015	gi|15213790	86.7	52	122	86	43	7	4	70	10	1	1	N
cf-contig_98	8	Ribosomal protein L41	8	Contig-98	Contig98	86.8	.	63.5	253	N	8	P8-1189090_037_F05	253	274	84	SRRMRAKWRKKRMRRLKRKRRKMRARSK	3	Ind		8	116	1	111	1	108	1	XC-contig_57	0.24	Ribosomal protein L41	ps	KOG	5e-10	100	hypothetical protein AOR_1_1366184	1E-006	gi|317138891	56.6	34	62	80	56	7	0	28	54	1	3	N	2.941
cf-contig_144	4	ribosomal protein L44e	4	Contig-144	Contig144	89.2	.	64.4	317	N	4	CAFL_P1-014_B02	317	337	258	GAHKVTQYKKSKERHAAQGRRRYDRKQQGFGGQTKPIFRKKAKTTKKIVLRMECSDCKFRKQIPLKRCKHFELGGDKKRKGQMIQF	3	Ind		4	43	2	36	2	34	2	XC-contig_81	0.61	ribosomal protein L44e	ps	NR	2e-42	80.7	ribosomal protein L44e	2E-042	gi|70909937	175	83	104	97	81	2	0	21	9	1	3	N
cf-contig_145	1	ribosomal protein L44e	1	Contig-145	Contig145	64.5	.	64.7	310	N	1	CAFM_P2-073_D09	310	329	252	HKVTQYKKSKERHAAQGRRRYDRKQQGFGGQTKPIFRKKAKTTKKIVLRMECSDCKFRKQIPLKRCKHFELGGDKKRKGQMIQF	2	Ind		1	43	2	36	2	34	2	XC-contig_81	0.59	ribosomal protein L44e	ps	NR	2e-42	80.7	ribosomal protein L44e	2E-042	gi|70909937	175	83	104	97	81	2	0	21	2	1	2	N
cf-contig_111	5	ribosomal protein L4e	5	Contig-111	Contig111	65.	0.1	56.5	479	N	5	CAFL_P1-060_C08	481	711	411	PXKSSSKSKAGYNLPQPKMANTDLARLLKSEEIRKVLRAPKKTVTRRVKKLNPLTNARAMLKLNPYAAVTKRKAILATKKRLLENVLLDAKKSGTKLSDSHVAARTAKLIEKRRAALKKAKAAKPKKAKTAAKPVKK	3	Cyt		5	124	1	119	1	116	1	XC-contig_26	2e-05	ribosomal protein L4e	ps	NR	6e-38	33.4	ribosomal protein L4e	6E-038	gi|70909603	162	133	404	64	33	48	0	271	9	1	3	N
cf-contig_285	1	Ribosomal protein L6e	1	Contig-285	Contig285	60.3	.	72.3	140	N	1	CAFM_P2-066_H10	140	159	114	GQEAPRPQTFVYIFVSYVWFEIFPISTSYEVLNTIFIK	2	Ind		1	62	2	55	2	51	2	XC-contig_64	0.055	Ribosomal protein L6e	ps	PFAM	2e-09	27.7	60S ribosomal protein L6	3E-008	gi|332026913	62	29	303	90	10	3	0	274	6	1	3	N
cf-contig_729	1	Ribosomal protein L6e	1	Contig-729	Contig729	58.2	.	68.1	144	N	1	P10-1189189_054_F08	144	163	126	RPGEYQEAPRPQTFVYIFVSYVWFEIFPISTSYEVLNTIFIK	1	Ind		1	62	2	55	2	51	2	XC-contig_64	0.059	Ribosomal protein L6e	ps	PFAM	1e-10	29.6	60S ribosomal protein L6	9E-009	gi|332026913	63.9	31	303	87	11	4	0	272	11	1	2	N
cf-contig_289	1	ribosomal protein L7A	1	Contig-289	Contig289	63.8	.	53.3	476	N	1	CAFL_P1-046_B06	476	495	417	GTPKRPNVVRSGTNTVTKLVEQKKAQLVVIAHDVDPLELVLFMPALCRKMGVPYCIVKGKARLGALVRRKTCTCVALTNVDTGDRVGLNKLVEAVKTNYNDRHDEIRRHWGGGVLGSKSAARIAKLEKIKAREMAQKQG	1	Cyt		1	232	1	237	1	236	1	XC-contig_252	1e-16	ribosomal protein L7A	ps	NR	1e-61	51.1	ribosomal protein L7A	1E-061	gi|268306466	239	136	268	81	51	25	0	132	7	1	1	N
cf-contig_521	1	ribosomal protein P2 - signalP detected	1	Contig-521	Contig521	63.2	.	58.5	253	N	1	P2-1190415_060_C08	253	272	192	VVVVHQLQLLLAAPLRLLKKRKKRKKRPKRKNRSPRTIWVSVSLTKEYVCLTYNEIINLNVTYT	3	Ind		1	426	1	435	1	440	1	XC-contig_70	1e-11	ribosomal protein P2 - signalP detected	ps	NR	1e-16	49.5	ribosomal protein P2	1E-016	gi|268306500	90.1	55	113	83	50	9	1	58	5	1	2	N
cf-contig_140	2	ribosomal protein rps9	2	Contig-140	Contig140	75.6	.	59.1	279	N	2	P12-1189332_061_B07	278	298	192	SARDTFVFASKLLIFPPSLCVWIHKKHIDFSLKSPFGGGRPGRVKRKNLRKGSGGGAAAEEEED	1	Ind		2	20	3	18	3	17	3	XC-contig_147	0.04	ribosomal protein rps9	ps	NR	3e-24	20.6	ribosomal protein rps9	3E-024	gi|166952357	70.1	72	194	72	38	11	0	120	3	2	1	Y
cf-contig_297	1	ribosomal protein S11-2	1	Contig-297	Contig297	57.	0.6	58.2	151	N	1	CAFL_P1-075_C09	151	170	168	AGRLNEPSRSXLGVNLNRKIGLKKKSLRLHRNVGLGFKTPREAIEGSYIDKKKKKK	1	Ind		1	239	1	244	1	243	1	XC-contig_85	3e-20	ribosomal protein S11-2	ps	NR	1e-11	25	ribosomal protein S11-2	1E-011	gi|121512014	73.2	37	152	89	25	4	0	14	37	1	1	N
cf-contig_146	5	Ribosomal protein S18	5	Contig-146	Contig146	83.9	.	61.3	454	N	5	P15-1189742_063_A07	453	473	402	AGDGKRKVMFAMTAIKGVGRRYANIVLKKADVDLNKRAGECTEEEVEKIVTIMSTPRQFKIPDWFLNRQKDIVDGRYSQLTSSNLDSKLREDLERMKKIKAHRGMRHYWGLRVRGQHTKTTGRRGRTVGVSKKK	3	Cyt		5	139	1	136	1	133	1	XC-contig_87	9e-89	Ribosomal protein S18	ps	KOG	2e-57	86.8	ribosomal protein S18	1E-069	gi|121512018	266	131	152	99	87	1	0	21	9	1	3	N
cf-contig_129	6	Ribosomal protein S19e	6	Contig-129	Contig129	79.5	.	61.9	252	N	6	P11-1189219_016_A02	252	273	213	RDGVSPSHFHKSSGGIARKALQALESLKLVEKHPDGGRKLTVQGRRDLDRIAAQVRAKQRARKDTTGPIVL	3	Ind		6	134	1	130	1	127	1	XC-contig_182	1e-42	Ribosomal protein S19e	ps	PFAM	5e-24	42.8	ribosomal protein S19e	3E-019	gi|70909579	98.6	69	153	67	46	23	0	84	3	1	3	N
cf-contig_151	5	Ribosomal protein S21e	5	Contig-151	Contig151	81.6	0.2	61.2	424	N	5	CAFL_P1-028_C04	406	443	255	TKMENDAGEFVDLYCPGKCSASNRIIHAKDHASIQLNIAEVDPTTGRMTDTSKMYAICGAIRRMGESDDCIGRLAKKDGIVAKNF	1	Cyt		5	142	1	139	1	136	1	XC-contig_247	8e-24	Ribosomal protein S21e	ps	PFAM	1e-41	101.2	40S ribosomal protein S21-like	1E-036	gi|345483752	156	83	99	88	85	10	0	16	85	1	1	N
cf-contig_651	1	ribosomal protein S24e	1	Contig-651	Contig651	64.3	.	64.6	255	N	1	P7-1189014_001_H01	255	274	177	RKSEERKNLKLVLLLKSNFEHPTICLEICARQQERLFFDCILAFIFCQSILYSLNLQIY	1	Cyt		1	91	2	84	2	556	1	XC-contig_146	0.096	ribosomal protein S24e	ps	NR	1e-13	30	ribosomal protein S24e	1E-013	gi|69608490	80.1	39	132	95	30	2	0	93	6	1	3	N
cf-contig_217	3	ribosomal protein S25	3	Contig-217	Contig217	79.2	0.3	59.7	343	N	3	P16-1189849_046_B06	343	362	303	GKKRXSGGGKAKKKKWSKGKVRDKLDNQVLFNKETYDKLYKEVPQYKLITPSVVSERLKIRGSLARRALIELREKGLIKQVVQHHAQLIYTRTTKGDDTVA	1	Ind		3	175	1	178	1	176	1	XC-contig_65	5e-65	ribosomal protein S25	ps	NR	2e-48	84	ribosomal protein S25	2E-048	gi|121511978	195	99	119	98	84	2	0	20	4	1	1	N
cf-contig_192	4	Ribosomal protein S26e	4	Contig-192	Contig192	72.6	.	61.1	275	N	4	P18-1190043_062_B08	275	296	237	GEFVIRNIVEAAAVRDITEASVYSAYVLPKLYAKLHYCVSCAIHSKVVRNRSKEDRRIRTPPVRSFPRDNQRQQNAPRK	1	Ind		4	163	1	165	1	163	1	XC-contig_129	0.96	Ribosomal protein S26e	ps	PFAM	4e-35	66.3	AGAP012100-PA	2E-031	gi|118792636	139	77	115	87	68	10	0	38	4	1	1	N
cf-contig_167	4	ribosomal protein S27	4	Contig-167	Contig167	80.9	0.5	61.8	162	N	4	P7-1188996_053_F07	165	186	120	GRGRXCPGEACGAGVFMAAMTDRHYCGKCGYTLVFSKPEE	1	Ind		4	149	1	151	1	149	1	XC-contig_102	5e-25	ribosomal protein S27	ps	NR	8e-15	23.8	ribosomal protein S27	8E-015	gi|121511932	84	36	155	97	24	1	0	119	10	1	1	N
cf-contig_168	1	ribosomal protein S27	1	Contig-168	Contig168	64.6	.	62.2	410	N	1	P13-1189416_063_A07	410	429	354	GGQQRLIFAGKQLEDGRTLSGYNIQKESTLHLVLPLRGGAKKRKKKNYSTPKKIKHKKKKVKLAILKCYKVDENGKIFRMRRECPGEACGAGVFMAAMTDRHYCGKCGYTLVFSKPEE	1	Cyt		1	150	1	152	1	150	1	XC-contig_102	8e-80	ribosomal protein S27	ps	NR	3e-60	74.8	ribosomal protein S27	3E-060	gi|121511932	234	115	155	97	75	3	0	40	7	1	1	N
cf-contig_234	3	ribosomal protein S27	3	Contig-234	Contig234	89.5	.	64.7	358	N	3	P19-1190167_090_D12	358	377	267	RGCRNMPLAKDLLHPTIAEEKRRHKLKRLVQHPNSYFMDVKCPGCYKITTVFSHAQSVVVCAGCSTILCQPTGGRARLTEGCSFRRKQH	2	Cyt		3	184	1	187	1	185	1	XC-contig_86	4e-63	ribosomal protein S27	ps	NR	5e-44	100	ribosomal protein S27	5E-044	gi|121512016	181	83	84	100	100	0	0	1	17	1	2	N
cf-contig_139	3	Ribosomal protein S4	3	Contig-139	Contig139	83.4	.	58.2	573	N	3	P3-1188562_045_B05	574	593	492	KSLGEYGLRNKREVWRVKYTLAKIRKAARELLTLDEKDGKRLFEGNALLRRLVRIGVLDESRMKLDYVLGLKIEDFLERRLQTQVFKLGLAKSIHHARVLIRQRHIRVRKQVVNIPSFIVRLDSQKHIDFSLKSPFGGGRPGRVKRKNLRKGSGGGAAAEEEED	1	Cyt		3	20	3	18	3	17	3	XC-contig_147	0.095	Ribosomal protein S4	ps	KOG	4e-73	89.6	similar to S9e ribosomal protein isoform 1	9E-082	gi|91089607	306	163	194	94	85	9	0	31	25	1	1	N
cf-contig_96	3	ribosomal protein S6e	3	Contig-96	Contig96	83.9	.	55.3	339	N	3	CAFM_P2-071_E09	325	358	288	RYVVRRPLPVKEGKKPRTKAPKIQRLITPAVLQRKRHRLALKKKRCLKRKEQAADYAKLLAQRKKESKVRRQEELKRRRSASMRDSKSSASSAPQK	1	Ind		3	39	2	32	2	30	2	XC-contig_137	1e-58	ribosomal protein S6e	ps	NR	1e-37	41	ribosomal protein S6e	1E-037	gi|70909493	159	95	233	84	41	15	0	138	1	1	1	N
cf-contig_141	1	Ribosomal protein S9 - mitotic spindle elongation - mitotic spindle organization - rRNA binding - ribosome - structural constituent of ribosome -	1	Contig-141	Contig141	64.2	.	59	401	N	1	P13-1189441_060_C08	401	420	339	GRGIGVLDESRMKLDYVLGLKIEDFLERRLQTQVFKLGLAKSIHHARVLIRQRHIRVRKQVVNIPSFIVRLDSQKHIDFSLKSPFGGGRPGRVKRKNLRKGSGGGAAAEEEED	1	Cyt		1	20	3	18	3	17	3	XC-contig_147	0.063	Ribosomal protein S9 - mitotic spindle elongation - mitotic spindle organization - rRNA binding - ribosome - structural constituent of ribosome -	ps	GO	4e-53	56.9	similar to S9e ribosomal protein isoform 1	6E-053	gi|91089607	210	109	194	95	57	5	0	85	10	1	1	N
cf-contig_306	1	ribosomal RNA (CR40766) rRNA	1	Contig-306	Contig306	65.1	.	48.2	178	N	1	CAFL_P1-023_E03	178	197	141	VGGSRWCAQKGLGVSLPGAAIGADLGGSSKYTNINIGFLLGKKKKKK	1	Ind		1	247	1	252	1	251	1	XC-contig_231	0.54	ribosomal RNA (CR40766) rRNA	ps	RRNA	1e-13	9.1	hypothetical protein EAG_03557	7E-011	gi|307185262	70.9	35	306	91	12	3	0	193	43	1	-3	N
cf-contig_110	7	ribosome-associated protein P40 Tribolium castaneum - signalP detected	7	Contig-110	Contig110	82.8	.	57.5	360	N	7	P4-1188690_007_E01	353	395	309	RGDVVVDLFFYRDPEEVEKEDLVHKEVVAKVETAVAHDTAEVWAGDEPATQLWTDDAPVAAVPAVYPAAASQDWAEQVQEEWAANPTPAAGQTTWGSSTQEWS	2	BL	3,3,3,	7	123	1	118	1	115	1	XC-contig_115	9e-34	ribosome-associated protein P40 Tribolium castaneum - signalP detected	ps	NR	3e-18	35.7	similar to ribosome-associated protein P40	3E-018	gi|91089051	95.1	105	302	50	35	53	8	196	8	1	2	N
cf-contig_183	4	S10e ribosomal protein	4	Contig-183	Contig183	81.9	.	64.1	158	N	4	P1-1152531_056_E08	202	192	153	CRCWHWGLGIPWWIWTWQTRTSINLYKVIYNKISIKHLIDKKKKKKKKKKK	2	Ind		4	158	1	160	1	158	1	XC-contig_83	5e-17	S10e ribosomal protein	ps	NR	5e-07	18.7	S10e ribosomal protein	5E-007	gi|121512010	58.2	29	160	83	19	5	0	131	15	1	3	N
cf-contig_238	3	S17e ribosomal protein Tribolium castaneum	3	Contig-238	Contig238	91.3	.	68.3	211	N	3	P7-1188942_013_B01	220	230	162	GRRERRDNFVPEVSALEHDIIEVDPETKEMLSMLDFKNISGLQLTQPQTFNARR	2	Ind		3	187	1	190	1	188	1	XC-contig_142	4e-31	S17e ribosomal protein Tribolium castaneum	ps	NR	3e-17	40.4	similar to S17e ribosomal protein	3E-017	gi|91094139	92	52	131	88	40	6	2	78	8	1	2	N
cf-contig_720	1	Signal recognition particle protein 72 - dsRNA transport - 7S RNA binding - SRP-dependent cotranslational protein targeting to membrane - signal	1	Contig-720	Contig720	65.4	.	61.4	442	N	1	P10-1189167_074_D10	442	461	360	GASPGTPGTELLQKSKTKKNRKRKGKLPKNYDASQTPDPERWLPKHERTGFRKKRDRRTRDIIKGSQGMATGAADQYDMTKAQNLQNKNSPVPQTTPDAQGPRQQQRKVTQKKKKKGNKW	1	Cyt		1	584	1	600	1	613	1	XC-contig_38	0.028	Signal recognition particle protein 72 - dsRNA transport - 7S RNA binding - SRP-dependent cotranslational protein targeting to membrane - signal	ps	GO	1e-31	17.8	Signal recognition particle 72 kDa protein	9E-035	gi|307206401	150	118	657	64	18	43	3	539	7	1	1	N
cf-contig_197	2	Translation elongation factor EF-1 gamma	2	Contig-197	Contig197	80.3	.	60.9	703	N	2	P10-1189159_010_D02	703	722	552	REPKAEEPAEEMDAAEAALAGEPKSKDPFDSLPKGTFNMDDFKRFYSNEDESKSVPYFWEKFDPENYSIWFGEYKYNDELTKVFMSCNLITGMFQRLDKMRKQAFSSVCLFGEDNNSSISGVWVWRGQELAFNLSPDWQIDYETYNWVKLDPKSEETKKLVKQYFSWEGADKNGRKFNQGKVFK	3	Cyt		2	48	2	41	2	38	2	XC-contig_88	0.12	Translation elongation factor EF-1 gamma	ps	KOG	1e-75	100	elongation factor 1 gamma	5E-093	gi|157128964	345	183	432	85	43	26	0	249	3	1	3	N
cf-contig_198	2	Translation elongation factor EF-1 gamma	2	Contig-198	Contig198	67.	.	64.8	646	N	2	P12-1189370_071_E09	683	665	456	PKGTFNMDDFKRFYSNEDESKSVPYFWEKFDPENYSIWFGEYKYNDELTKVFMSCNLITGMFQRLDKMRKQAFSSVCLFGEDNNSSISGVWVWRGQELAFNLSPDWQIDYETYNWVKLDPKSEETKKLVKQYFSWEGADKNGRKFNQRKVFK	1	Cyt		2	48	2	41	2	38	2	XC-contig_88	0.11	Translation elongation factor EF-1 gamma	ps	KOG	2e-71	96.2	GI22348	6E-078	gi|195112388	294	151	426	88	36	18	0	275	1	1	1	N
cf-contig_751	1	Translation initiation factor 3 subunit e (eIF-3e)	1	Contig-751	Contig751	63.7	.	64.1	627	N	1	P11-1189273_056_E08	627	646	546	GAGNRHYGRGTRRNALKDLVKVIQQESYTYRDPITEFIEHLYVNFDFEGARQKLHECQTVLYNDFFLIACLSEFVENARLMIFETFCRIHNCISIGMLAEKLNMNPEEAECWIVNLIRNARLDAKIDSKLGHVVMGGQPLSPYQQLIEKIDSLAVRSEALAGLVDRKHKAKNQDIRWGTQEF	2	Cyt		1	604	1	624	1	638	1	XC-contig_42	0.11	Translation initiation factor 3 subunit e (eIF-3e)	ps	KOG	3e-77	37.2	similar to putative eukaryotic translation initiation factor 3 subunit 6	1E-082	gi|91079354	310	169	440	87	39	21	0	271	35	1	2	N
cf-contig_531	1	Translation initiation factor 4F helicase subunit (eIF-4A)	1	Contig-531	Contig531	65.4	.	62.7	558	N	1	P2-1190457_004_G02	558	577	447	GKLETLCDLYDTLSITQAVIFCNTRRKVDWLTESMHNRDFTVSALHGDMEQKERDVIMRQFRTGSSRVLITTDLLARGIDVQQVSLVINYDLPSNRENYIHRIGRGGRFGRKGVAINFVTDEDKRTLQDIEQFYNTHIDEMPMNVADLI	3	Cyt		1	434	1	444	1	449	1	XC-contig_219	0.45	Translation initiation factor 4F helicase subunit (eIF-4A)	ps	KOG	1e-63	37.2	Eukaryotic initiation factor 4A-II	2E-077	gi|332026541	292	147	423	96	35	5	0	276	6	1	3	N
cf-contig_646	1	Translation machinery associated TMA7	1	Contig-646	Contig646	62.9	.	68.8	257	N	1	P7-1189006_035_G05	257	276	180	PGRQEKPLKAAKKQDKELDDDDLAHKQKMKEQQKALQEAKAKASQKGPLVGGGIKKSGKK	2	Ind		1	528	1	540	1	551	1	XC-contig_176	0.059	Translation machinery associated TMA7	ps	PFAM	7e-24	98.4	hypothetical protein	3E-020	gi|91085719	102	58	64	81	92	11	0	6	5	1	2	N
cf-contig_195	4	translationally controlled tumor protein	4	Contig-195	Contig195	80.5	.	70.4	513	N	4	P2-1190473_034_H06	513	533	339	TATESGVDVVLNHRLCETFAFSDKKSYTLYLKDYMKKLVAKLEEKSPEQVEVFKTNMNKVMKEILSRFKEMQMFTGESMDCDGMVALMEYREIDGESVPILMFFKHGLEEEKF	2	Cyt		4	166	1	168	1	166	1	XC-contig_55	2e-75	translationally controlled tumor protein	ps	NR	8e-56	67.4	translationally controlled tumor protein	8E-056	gi|121511968	220	115	172	93	67	8	0	57	5	1	2	N	0.87
cf-contig_124	6	ubiquitin-ribosomal protein S30e fusion protein	6	Contig-124	Contig124	91.6	.	63.1	344	N	6	P19-1190177_072_E10	346	369	297	AGVCGDDIRLSCEGTILSKEDSLSSLSSCQLDLTVSLLRGKVHGSLARAGKVKGQTPKVEKQEKKKKKTGRAKRRIQYNRRFVNVVQGFGRRRGPNANA	1	Ind		6	131	1	127	1	124	1	XC-contig_91	2e-61	ubiquitin-ribosomal protein S30e fusion protein	ps	NR	2e-45	74.6	ubiquitin-ribosomal protein S30e fusion protein	2E-045	gi|121512022	185	96	130	94	75	5	0	34	7	1	1	N
Signal transduction
cf-contig_783	1	Ca2+-binding protein EF-Hand protein superfamily	1	Contig-783	Contig783	56.5	.	66.2	806	N	1	P13-1189481_086_F12	806	825	432	LAIMSHNQYGGYPGSYPQSQSSVPPEIQQWFNAVDRDRSGKITAKELQSALVNGKGQNFSDNACQLMIGMFDLDKTGTIDIYEFEKLYAYINQWLTVFKTYDRDHSGHIEKEELSQALTQMGFRFSDQFITFLVNKSDVQNHKE	1	Cyt		1	628	1	649	1	665	1	XC-contig_155	0.19	Ca2+-binding protein EF-Hand protein superfamily	st	KOG	8e-44	62	CG17765	6E-051	gi|19921976	205	137	199	71	69	40	3	15	136	1	1	N
cf-contig_596	1	Mitogen-activated protein kinase kinase 1 interacting	1	Contig-596	Contig596	64.8	.	68.3	417	N	1	P5-1188777_026_D04	417	436	336	PGRVNGLLCILITDRDGVPLLRVASERAPELSMRPGFLSTFGMATDQASKLGLGRNKTVICMYSNYQVIQMNKQPLVLSFVGTESCNTGHVLSLESQIEPFLEDLRFVVKDS	2	Cyt		1	485	1	496	1	505	1	XC-contig_215	0.019	Mitogen-activated protein kinase kinase 1 interacting	st	PFAM	4e-42	89.9	Mitogen-activated protein kinase kinase 1-interacting protein 1	1E-036	gi|307210664	156	108	124	66	88	37	0	16	11	1	2	N
cf-contig_567	1	protein phosphatase 1 catalytic subunit beta isoform 1	1	Contig-567	Contig567	67.5	.	64	348	N	1	P4-1188645_032_A04	348	367	150	GNKAASNQIVQCQKMMKEQLAKEKKIYANMFDKFARRDTEVKSERGGSEA	3	Ind		1	463	1	473	1	480	1	XC-contig_139	0.19	protein phosphatase 1 catalytic subunit beta isoform 1	st	NR	2e-15	11.8	hypothetical protein TcasGA2_TC008405	2E-015	gi|270006236	86.3	89	454	47	20	49	0	365	3	1	3	N	2.247
cf-contig_644	1	RhoGAP54D - signal transduction - intracellular	1	Contig-644	Contig644	65.3	.	68	437	N	1	P7-1188989_088_E12	437	456	369	RVDEDDKSPKFDSVTQDSSQSLTNTFRDYLYSRSTMTNSPMVDNSFSSRPDDFQSNPDLPYLSENELTDSMLYCLNGNDPDASGSKISKQKSFSNFDFTSSDGISSAKCARKSDMSNIMETSL	3	Cyt		1	527	1	539	1	549	1	XC-contig_209	1.7	RhoGAP54D - signal transduction - intracellular	st	GO	2e-09	10.5	rho gtpase activating protein	5E-015	gi|157136992	84.7	102	917	43	11	62	0	815	45	1	3	N
cf-contig_323	1	signal transducer - GTPase activator - regulation of G-protein coupled receptor protein signaling pathway	1	Contig-323	Contig323	64.4	.	51.7	581	N	1	CAFL_P1-033_H05	581	600	465	SDTLFDGEQPTLEEIRSWGKSFDKLMRSPSGRKAFREFLRCEYSEENILFWLACEELKKETNPEAIEEKARFIYEDYISILSPKEVSLDSRVREIVNRNMVEPTPHTFDEAQLQIYTLMHRDSYPRFINSSQFKTLAQIPDGVSASGSTAESPSN	3	Cyt		1	260	1	266	1	265	1	XC-contig_57	0.9	signal transducer - GTPase activator - regulation of G-protein coupled receptor protein signaling pathway	st	GO	4e-65	54.3	AGAP007127-PA	2E-083	gi|158286230	312	154	237	99	65	1	0	83	3	1	3	N
cf-contig_290	1	Uncharacterized protein - transferase transferring phosphorus-containing groups - ATP binding - protein serine/threonine kinase	1	Contig-290	Contig290	63.8	.	52.3	157	N	1	CAFL_P1-061_B07	157	176	78	RHGGGISLKSQLFGRLGWENSLSPGG	2	Ind		1	25	3	21	3	52	2	XC-contig_160	0.44	Uncharacterized protein - transferase transferring phosphorus-containing groups - ATP binding - protein serine/threonine kinase	st	GO	5e-10	6.2	hCG2015412	2E-012	gi|119618519	75.9	43	149	79	30	9	0	95	12	1	-1	N
cf-contig_315	1	Caspase 7 apoptosis-related cysteine peptidase - apoptosis - proteolysis - cysteine-type endopeptidase	1	Contig-315	Contig315	61.5	.	44.9	295	N	1	CAFL_P1-053_F07	295	314	309	HAGFRSWPHKLTRLLRCEPAGGLWKVGVVGMLELRSWRPTWATQPVFTKSLKLVEPGGGSLRSQLPRRLRWDDHLSPEGGGCSERRLHSSLCKGNSVSKKKKK	2	Cyt		1	254	1	259	1	258	1	XC-contig_18	0.55	Caspase 7 apoptosis-related cysteine peptidase - apoptosis - proteolysis - cysteine-type endopeptidase	st/apoptosis	GO	3e-07	30	hypothetical protein LOC100507445	8E-009	gi|310109944	63.9	62	121	57	52	27	2	59	67	1	1	N	3.226
cf-contig_579	1	programmed cell death 6-interacting protein	1	Contig-579	Contig579	62.7	.	66.4	580	N	1	P4-1188706_037_F05	580	599	264	GAGESALRPGSTSGQTMPIPYGASNVAPYPTYVPPPMPQGYNPYGTLPYPQGYNYPGFPQAPPYGGYTPSMPYQQQPPQNPRQKPPGW	2	Cyt		1	472	1	482	1	491	1	XC-contig_68	0.02	programmed cell death 6-interacting protein	st/apoptosis	NR	2e-22	9.3	hypothetical protein TcasGA2_TC000807	2E-022	gi|270001905	110	77	846	65	9	27	6	766	44	1	2	N
Transcription machinery
cf-contig_687	1	Another transcription unit - biological_process - cellular_component - molecular_function	1	Contig-687	Contig687	64.1	.	62.6	438	N	1	P9-1188473_094_B12	438	457	417	GRGKRSSDKPCDHHVQHQNQNAVGTLLLTQHFVKMRDLKMKEPFQLQLSKINLINQKMVHLVQQKLVGQYIPLMKMVQILKLTKPRKLINLRHCRILMKAVRLVEVVMMMLILLTNLVLIMILISQMMIRYLMITNNYI	2	Cyt		1	560	1	575	1	587	1	XC-contig_65	0.037	Another transcription unit - biological_process - cellular_component - molecular_function	tm	GO	2e-18	18	AGAP003242-PA	4E-021	gi|347969528	104	130	678	51	19	65	8	528	10	1	1	N
cf-contig_746	1	DNA-directed RNA polymerase subunit RPB10	1	Contig-746	Contig746	63.6	.	67.1	267	N	1	P11-1189255_010_D02	267	286	117	MCLQIDMLCKCMYLQTDILCNVMKNKCYERTLLKKKKKK	1	Ind		1	601	1	620	1	634	1	XC-contig_149	0.029	DNA-directed RNA polymerase subunit RPB10	tm	KOG	5e-18	53.6	hypothetical protein DAPPUDRAFT_230475	1E-013	gi|321475125	79.7	36	67	100	55	0	0	31	21	1	3	N
cf-contig_241	3	Elongation factor 1 beta/delta chain	3	Contig-241	Contig241	78.7	.	67.9	286	N	3	P12-1189344_059_C07	287	305	246	PGVKPWDDETDMKEMEKVVRSIEMDGLVWGASKLVPVGYGINKLQIICVVEDDKVSIDLLTEEIQNFKDFVQSVDIAAFNKI	2	Cyt		3	190	1	193	1	191	1	XC-contig_144	0.39	Elongation factor 1 beta/delta chain	tm	KOG	5e-40	34.6	elongation factor 1 beta/delta chain	9E-035	gi|289741149	150	79	222	88	36	9	0	143	8	1	2	N
cf-contig_695	1	Exon-exon junction complex Magoh component	1	Contig-695	Contig695	64.4	.	71.1	331	N	1	P9-1188489_026_D04	331	350	261	RGKKIHDSEIMQEDDSQWPQPDRVGRQELEIVIGDEHISFTTSKTGSLVDVNQSRDPEGLRCFYYLVQDLKCLVFSLIGLHFKIKPI	2	Cyt		1	567	1	582	1	594	1	XC-contig_64	0.64	Exon-exon junction complex Magoh component	tm	KOG	4e-43	56.4	protein mago nashi homolog 2-like	9E-040	gi|156544015	166	82	146	96	57	3	0	64	14	1	2	N
cf-contig_632	1	LOW QUALITY PROTEIN: transcription elongation factor SPT5	1	Contig-632	Contig632	63.3	.	66.8	361	N	1	P6-1188923_034_H06	361	380	285	GRADRGLANQTSVIKGLQGGMCTVFLPAEDRSVNIECDHLEPVQPAINDYVKVIMGVHRESVGILLSSDGPDGVIRMKDQVEMLQLRFLCKMYRQ	1	Cyt		1	516	1	528	1	538	1	XC-contig_243	0.38	LOW QUALITY PROTEIN: transcription elongation factor SPT5	tm	NR	2e-22	7.9	LOW QUALITY PROTEIN: transcription elongation factor SPT5	2E-022	gi|328775915	108	89	1134	60	8	36	1	1040	10	1	1	N
cf-contig_684	1	Nuclear exosomal RNA helicase MTR4 DEAD-box superfamily	1	Contig-684	Contig684	39.2	.	74.8	931	N	1	P9-1188465_030_B04	931	950	234	RDGCCACPGVRGSKFAELCYMTDIFEGSIIRCMRRLEELLRLMIHAAKSIRNTDLEIKFSEGIQLLKRDIVFAASLYL	3	Cyt		1	557	1	572	1	584	1	XC-contig_163	0.024	Nuclear exosomal RNA helicase MTR4 DEAD-box superfamily	tm	KOG	2e-28	6.6	AGAP009600-PA	1E-021	gi|158298455	108	70	1036	75	7	18	0	966	15	1	3	N
cf-contig_509	1	RNA polymerase-associated protein CTR9 homolog	1	Contig-509	Contig509	62.1	0.5	60.9	403	N	1	P20-1190293_036_G06	403	422	324	ESXHYGRGPEKAVVCPVPNREAHRGQRLVAREDRAADQEVEACQDLEVDLFPEVFHDLEVSQVLVADQVVDLGAPDQILVVEENHQSLEKVYLVVSLAKTKNYIFYML	1	Ind		1	416	1	425	1	430	1	XC-contig_127	0.087	RNA polymerase-associated protein CTR9 homolog	tm	NR	1e-17	8.2	RNA polymerase-associated protein CTR9 homolog	1E-017	gi|340710827	93.2	196	1190	66	17	33	11	993	15	4	3	N
cf-contig_505	1	Telomerase elongation inhibitor/RNA maturation protein PINX1	1	Contig-505	Contig505	56.8	.	69.2	844	N	1	P20-1190269_040_E06	844	863	654	IFKGLCLHFFYPQIYNFVIMDFAKNQLLKYGWKEGEGLGKNNDGISSALKPSLKFDKCGIGHDPAKEFTDHWWEEGYNNAVNNINVSNSEGDVKVSAEKCLEEVKKTSRKAKYESFLKTSTLTSQGYEEQTGTKQESITKPIKHVALTDEELLKACGKRTAHKGARHGLNLTGKLARIKAQEEELLMLFKNKNKSLETNSDSLSKVSKKKKRKHKSKE	2	Cyt		1	413	1	422	1	427	1	XC-contig_236	0.056	Telomerase elongation inhibitor/RNA maturation protein PINX1	tm	KOG	1e-19	70.5	similar to CG15561 CG15561-PA	1E-043	gi|91086943	181	200	389	49	52	106	10	1	212	1	2	N
cf-contig_767	1	transcription elongation factor 1 homolog isoform 1 Bombus terrestris	1	Contig-767	Contig767	64.6	.	68	496	N	1	P13-1189420_095_A11	496	515	249	AGGRRKSKRKPPAKRKAIQPLDVQFNCPFCNHEKSCEVTMDKGRNTARITCRVCLEDFQTTTNFLSEPVDVYNDWVDACESAN	1	Cyt		1	615	1	636	1	652	1	XC-contig_185	0.21	transcription elongation factor 1 homolog isoform 1 Bombus terrestris	tm	NR	2e-38	98.7	transcription elongation factor 1 homolog isoform 1	2E-038	gi|340723162	162	80	82	88	99	9	0	2	7	1	1	N
cf-contig_409	1	Transcription regulator XNP/ATRX DEAD-box superfamily	1	Contig-409	Contig409	63.2	.	70.4	723	N	1	P16-1189845_014_B02	723	742	600	PGSFEKKEWDFTQVAVAADQTNYEDSFVLSQDDKIEYDHDLSELEILERKLRKNSKKRQKSSNTASNRKNSSSDEETIIITRKRKQSSIKNETTKPSSDLTQILDEDDVFETKSSGEKKQFKTPEKSGRVRKIFTSPDLEDLDIIENSQSPKKKNYVNNYETKTSSDEGNQSITGRRKANFNKKTVKKLCILSDTESDLE	3	Cyt		1	335	1	343	1	344	1	XC-contig_57	0.013	Transcription regulator XNP/ATRX DEAD-box superfamily	tm	KOG	6e-07	11	CRE-XNP-1 protein	1E-005	gi|308498547	55.1	439	1391	22	32	134	17	3	57	4	3	N
cf-contig_368	1	transcriptional regulator DJ-1	1	Contig-368	Contig368	64.	.	65.2	450	N	1	P14-1189575_070_F10	450	469	357	AGWLKAFCQSEELGELLKAQEKCGRIVAAICAAPTALKAHKIGLKKRVTSYPSMKSEMVKDGCYTYVDDQKVVVDGNIITSQGPATAINFAIVLVEQISGREKAQEVSKGLLFDYCSLY	3	Cyt		1	297	1	304	1	305	1	XC-contig_214	5e-20	transcriptional regulator DJ-1	tm	KOG	4e-27	42.1	GH22956	5E-028	gi|195056378	127	111	189	54	59	52	0	76	6	1	3	N
cf-contig_311	1	Uncharacterized protein - regulation of transcription DNA-dependent - nucleus - DNA binding - chromatin	1	Contig-311	Contig311	64.9	.	52.3	176	N	1	CAFL_P1-005_F01	176	195	114	SLLKTGKISWAWWHVPVIPATGEAEAGVSLESGRRRLQ	2	Ind		1	25	3	21	3	52	2	XC-contig_161	0.078	Uncharacterized protein - regulation of transcription DNA-dependent - nucleus - DNA binding - chromatin	tm	GO	5e-15	31.2	hCG2019873	4E-014	gi|119628850	81.6	50	127	72	40	14	0	3	17	1	-3	N	2
cf-contig_476	1	retinoblastoma binding protein 4 like - ESC/E(Z) complex - DNA replication - regulation of transcription DNA-dependent - transcription - Membrane anchor detected	1	Contig-476	Contig476	52.1	.	66.5	402	N	1	P19-1190150_059_C07	402	421	306	VKSKATKMLKMVHQNSCSFTVATQLKFQISPGIPMSHGLFVRFLKITSCRFGKWLKISTMMKNQKHQLMNWNPLRHNYFNGFIFVILVVILSLHQSTTSIYI	1	Anch		1	387	1	396	1	401	1	XC-contig_226	0.003	retinoblastoma binding protein 4 like - ESC/E(Z) complex - DNA replication - regulation of transcription DNA-dependent - transcription - Membrane anchor detected	tm membrAnchor	GO	5e-38	18.3	chromatin assembly factor 1 subunit-like	3E-037	gi|291231647	158	202	427	92	48	6	0	223	24	2	3	N
Storage
cf-contig_210	3	vitellogenin 1	3	Contig-210	Contig210	83.7	.	62.4	319	N	3	P3-1188583_010_D02	318	338	222	RPGRTCFTIRALPACGKHCKPTETIQKEVEVHCPQGSVAEHYKQKILKGVNPDMSGKSVSRVLKFKVPRSCVAY	2	Ind		3	173	1	175	1	173	1	XC-contig_73	0.091	vitellogenin 1	storage/	NR	6e-15	3.4	vitellogenin 1	6E-015	gi|346969632	84.3	70	2052	56	3	31	2	1979	11	1	2	N
cf-contig_155	4	vitellogenin C	4	Contig-155	Contig155	81.3	.	54	649	N	4	P14-1189574_069_F09	649	668	564	AGDARMFVASYALADDSCQGPAKDLQRRVSDAICVRRETVYGNVISERQAGRKPHQQESSSSSSSSDSSSSSSSSSSSSSSSSSESSEEKTSHKKSGKKEHKSCSIKKQVQFVEKDGKLCFSIRPLAACQKHCKATETTQMEVEVYCPSGSLAELYKQKILKGANPDLSDKTPSRILKFKVPKACTAY	3	Cyt		4	44	2	37	2	35	2	XC-contig_57	3e-10	vitellogenin C	storage/	NR	3e-38	9	vitellogenin C	3E-038	gi|54289297	162	1696	2032	47	84	102	14	331	21	8	3	N
cf-contig_156	1	vitellogenin C	1	Contig-156	Contig156	50.8	.	55.5	536	N	1	P3-1188555_080_A10	536	555	453	TAGYGNVISERQAGRKSHQQESSSSSSSSDSSSSSSSSSSSSSSSSSESSEEETSHKKSGKKELKSCSIKKQVQCVEKDGKLCFSIRPLAACQKHCKATETTQMEVEVYCPSGSLAELYKQKILKGANPDLSDKTPSRILKFKVPKACTAY	1	Cyt		1	44	2	37	2	35	2	XC-contig_57	8e-11	vitellogenin C	storage/	NR	6e-32	7.6	vitellogenin C	6E-032	gi|54289297	141	1680	2032	50	83	78	11	347	10	7	1	N
cf-contig_472	1	ferritin Tribolium castaneum - Membrane anchor detected	1	Contig-472	Contig472	46.7	.	68.9	598	N	1	P19-1190127_064_A08	598	617	300	RGIDLKPTVPITTCADGLSALKDALKLEASVTRKIKHVIKACENDNGANDYHLVDYLTGEFLEEQYSGQRDLAGKISTLGKMMNQQGVLGEFLFDKKLLG	1	SIG	3,	1	383	1	392	1	397	1	XC-contig_202	4e-51	ferritin Tribolium castaneum - Membrane anchor detected	storage/ membrAnchor	NR	3e-28	45.1	similar to ferritin	3E-028	gi|91077442	129	96	215	67	45	32	0	115	7	1	1	N
Transporters
cf-contig_321	1	ADP/ATP translocase	1	Contig-321	Contig321	63.3	.	54.3	333	N	1	CAFL_P1-084_G12	333	352	309	RAARGMLPDPKNTPLVISWAIAQAVTTVAGIVSYPFDTVRRRMMMQSGRAKSEMLYKGTLHCWATIAKTEGSGAFFKGAFSNILRGTGGAFVLVLYDEIKKLL	2	Cyt		1	258	1	264	1	263	1	XC-contig_151	3e-06	ADP/ATP translocase	tr	NR	1e-47	33.6	ADP/ATP translocase	1E-047	gi|122938545	192	100	300	91	34	9	0	200	8	1	2	N
cf-contig_702	1	ATP binding - ATP-binding cassette (ABC) transporter complex - ATPase coupled to transmembrane movement of substances - transporter	1	Contig-702	Contig702	65.	.	64.4	565	N	1	P9-1188523_004_G02	565	584	360	GGITGRQQVCPIRQLSDGQRCRVVFAWLAWQVPHLLLLDEPTNHLDMETIDALADAINDFDGGMVLVSHDFRLINQVAEEIWVCENQTCTKWQGGILKYKDHLKSKVLKQNAANQANLRK	1	Cyt		1	572	1	587	1	599	1	XC-contig_26	0.05	ATP binding - ATP-binding cassette (ABC) transporter complex - ATPase coupled to transmembrane movement of substances - transporter	tr	GO	1e-55	18	ATP-binding cassette sub-family F member 2	3E-057	gi|114053001	225	406	622	87	65	15	0	216	4	2	1	N
cf-contig_502	1	Catecholamines up - regulation of epithelial cell migration open tracheal system - membrane - metal ion transport - transmembrane transport - metal	1	Contig-502	Contig502	63.9	.	65.7	395	N	1	P20-1190253_010_D02	395	414	222	SWICQNDEGNCVKEEDCPNHPSGDHEHHEGDDHEHHEEKHEDHENHDEKHENHENHDENHEHHENHDENHEHHD	1	Cyt		1	410	1	419	1	424	1	XC-contig_150	8e-05	Catecholamines up - regulation of epithelial cell migration open tracheal system - membrane - metal ion transport - transmembrane transport - metal	tr	GO	1e-09	16	Putative GTPases (G3E family)	2E-012	gi|291521858	76.3	93	391	42	24	43	14	208	58	4	1	Y
cf-contig_663	1	H+ transporting ATP synthase O subunit isoform 1 Bombyx mori	1	Contig-663	Contig663	62.	0.4	66.4	448	N	1	P8-1189070_073_D09	448	467	336	GGWGIVHYXAGAENGRLNKLEGVINAYKVMMSAHRGEVPCGVTTAKPLDENQRKQLESTLRGFLKPKENLLLTLKVNPSILGGMVVSIGDRYVDMSVASKVKLYTEIISTPV	2	Cyt		1	542	1	554	1	566	1	XC-contig_209	0.19	H+ transporting ATP synthase O subunit isoform 1 Bombyx mori	tr	NR	5e-33	48.3	ATP synthase delta chain	8E-034	gi|157127489	147	100	210	68	48	32	0	110	35	1	2	N
cf-contig_571	1	high-affinity choline transporter 1-like - signalP detected	1	Contig-571	Contig571	65.8	.	63.3	705	N	1	P4-1188658_045_B05	705	724	345	GEPMFGLPAAIHDPGWDGEKQLFPFRTMAMLMSLFTLASVSFLTKWLFESGRLAPQYDYFRCVVNIPEDVERVGDPAEDGEQMHAKLYFFNLEVTPHSLLSKNAALKNTQTHTVI	1	SIG		1	465	1	475	1	483	1	XC-contig_4	0.034	high-affinity choline transporter 1-like - signalP detected	tr	NR	5e-50	21.5	high-affinity choline transporter 1-like	5E-050	gi|193697533	202	124	584	76	21	29	0	393	10	1	1	N	0.806
cf-contig_307	1	lipid particle - ATP synthesis coupled proton transport - proton transport - mitochondrial proton-transporting ATP synthase complex coupling factor	1	Contig-307	Contig307	58.9	.	65.7	360	N	1	CAFL_P1-040_E06	360	379	249	YSISLIKMDQGKAPVRVSPLIKFGRWSFLVVGILYGAAHQSRLAKREVGIREVEAKHKAIRDAKLAEEKKRAQEEENKYFSSL	2	Ind		1	248	1	253	1	252	1	XC-contig_226	0.38	lipid particle - ATP synthesis coupled proton transport - proton transport - mitochondrial proton-transporting ATP synthase complex coupling factor	tr	GO	2e-22	88.8	AGAP006879-PA	6E-023	gi|118778802	110	70	82	77	87	16	0	6	38	1	2	N
cf-contig_235	3	mitochondrial import inner membrane translocase subunit Tim23 Pediculus humanus corporis	3	Contig-235	Contig235	94.7	.	65.4	691	N	3	P7-1189002_003_G01	706	712	429	TRGRFELAFSQIGSSCMIGAALGGMAGTYNGLKATTLLGQTGKLRRTQMLNHIMKQGSATANTLGTIAVMYSGLGVLLSWLRGEDDEINTLGAATTTGALYKSTAGLRKCAIGGGVGFSIAALYCIWTSRHAIQDIRRQYNPL	1	Cyt		3	185	1	188	1	186	1	XC-contig_237	0.005	mitochondrial import inner membrane translocase subunit Tim23 Pediculus humanus corporis	tr	NR	2e-50	70	mitochondrial import inner membrane translocase subunit Tim23, putative	2E-050	gi|242010956	203	137	197	69	70	42	0	60	13	1	1	N
cf-contig_654	1	Protein transporter of the TRAM (translocating chain-associating membrane) superfamily	1	Contig-654	Contig654	53.	.	68.6	603	N	1	P8-1189031_048_A06	603	622	300	GGRGIGLTAGAPYVLRIGSLLAVLSLQAFLMFTFITGQLARAREQKSAISAAFNLKGKKDSKKDKSKKDKGKREESDLPEVDQNTHKNLRSRSAAQAKAK	1	Cyt		1	535	1	547	1	559	1	XC-contig_92	0.14	Protein transporter of the TRAM (translocating chain-associating membrane) superfamily	tr	KOG	9e-09	21.3	hypothetical protein DAPPUDRAFT_325070	5E-010	gi|321462652	68.9	100	377	39	27	61	6	277	10	1	1	N
Unknown conserved
cf-contig_356	1	Conserved secreted protein precursor - signalP detected	1	Contig-356	Contig356	63.	.	66.1	731	N	1	P14-1189518_013_B01	731	750	660	RPGTTSSSRIFIKILFQELVEYLGLAKLNERLKDITLQEAFAGLFPRNNPRDTRFAINFFTSIGLGGLTDDLREHLKVLSKAPPPQVPTLHHKSSSSSSDSSSSSSSSSSSSSDSDSSTSSSTSSSSASGSKREKSKKHSKSKKSKDKSKSRKHKKEREASSSAKESSKKHSKKSKKRKEYEEEGYEKEHESHAENSHDHHHHRHHHHHRSRHERTHEKE	2	BL	3,	1	287	1	294	1	294	1	XC-contig_69	2e-96	Conserved secreted protein precursor - signalP detected	s/ucs	KOG	5e-51	23.2	AGAP007874-PA	5E-051	gi|158297380	205	822	971	52	85	108	9	45	11	2	2	N
cf-contig_543	1	AGAP009134-PA Anopheles gambiae str. PEST	1	Contig-543	Contig543	63.5	.	74.3	630	N	1	P3-1188556_095_A11	630	649	150	CRSCNVNVFFYVHENAEKFCHLLMQELFMLENKTNYYIIFPYIVFLKIKA	3	Ind		1	445	1	455	1	461	1	XC-contig_196	0.52	AGAP009134-PA Anopheles gambiae str. PEST	uc	NR	2e-07	30.3	AGAP009134-PA	2E-007	gi|158299879	60.1	36	122	72	30	10	0	64	7	1	1	N
cf-contig_712	1	Ankyrin repeats	1	Contig-712	Contig712	65.1	.	72.7	483	N	1	P10-1189135_014_B02	483	502	219	RNNFTFLKKENEKIKLNLCIEKYKIIQHNYCLIHLFDIFNNLFNRYPIFIIDLVFSINISCNNVGVTIYNFKV	1	Cyt		1	579	1	595	1	608	1	XC-contig_148	0.024	Ankyrin repeats	uc	PFAM	9e-10	59.3	Ankyrin repeat domain-containing protein 39	2E-006	gi|225708032	56.2	55	182	41	31	33	0	105	2	1	2	N
cf-contig_593	1	CG4593 CG4593-PA Tribolium castaneum	1	Contig-593	Contig593	64.9	.	68.4	364	N	1	P5-1188772_091_C11	364	383	186	GRGVRKMKVAKRNNAVVNRLDKTKREGHPDFRAEREQRDREEREDKKKLLREQKERERLEQT	1	Cyt		1	483	1	494	1	503	1	XC-contig_206	1e-05	CG4593 CG4593-PA Tribolium castaneum	uc	NR	2e-18	38.6	similar to CG4593 CG4593-PA	2E-018	gi|91094847	95.9	91	207	62	44	30	0	116	10	2	1	Y	2.198
cf-contig_454	1	Derlin-2 - retrograde protein transport ER to cytosol - endoplasmic reticulum unfolded protein response - ER-associated protein catabolic process -	1	Contig-454	Contig454	59.7	.	62.7	474	N	1	P18-1190051_028_C04	474	493	309	GAGQSGHYGRGVDLMGMAVGHLYYFIEDVFPNQPGGVKLLKTPNILKSLFDEYVEEPQYNPLPPEQRPGGFNWGEPEPRPENAAGDHGDTNNRDNQQRGNNNQ	2	Cyt		1	368	1	377	1	382	1	XC-contig_60	0.2	Derlin-2 - retrograde protein transport ER to cytosol - endoplasmic reticulum unfolded protein response - ER-associated protein catabolic process -	uc	GO	9e-23	26.7	Der1-like domain family, member 2-like	7E-022	gi|291232123	107	66	249	68	27	21	0	171	35	1	2	N
cf-contig_312	1	GK18829 Drosophila willistoni	1	Contig-312	Contig312	65.	0.2	65.5	430	N	1	CAFL_P1-006_F02	430	449	228	YTRQLLNQYNPTAYNYAPKYVPNWLIHQDLRISTIEEEISLYYTRYKARHPNVLICSSLYHQSVSKQESAMIYYKI	1	Ind		1	252	1	257	1	256	1	XC-contig_139	2.3	GK18829 Drosophila willistoni	uc	NR	6e-11	20.4	GK18829	6E-011	gi|195450373	51.6	123	220	48	56	23	0	80	6	2	3	Y	0.813
cf-contig_147	2	Histidine phosphatase superfamily	2	Contig-147	Contig147	69.6	.	72.5	660	N	2	P11-1189222_047_A05	664	679	489	AGVRQMEQCIQEFLNIAFGNNQLKQLSGGIYVDMMLKEFDRFIAEKNTNKDKLLRLFSGHDTTVAPALAALVGPQGFKKDGQDFTVNIPKYGATVVTELYKGSDGKHYIKILYWNDGKESELVVKVCGNTSCCSLETYKNLVQPIRISKEEVQKCAMTQGNNF	2	Cyt		2	18	3	17	3	16	3	XC-contig_52	0.0002	Histidine phosphatase superfamily	uc	PFAM	2e-15	34.3	venom acid phosphatase Acph-1-like	9E-009	gi|350416661	65.1	118	415	27	29	93	0	243	68	1	2	N
cf-contig_643	1	hypothetical protein	1	Contig-643	Contig643	64.5	.	72	360	N	1	P7-1188987_072_E10	360	379	261	GVQEQLESAKTAQTLIEDLDITNLAPRKPDWDLKRDIAKKLDKLERRTQRAIAELIRERLKSGKEDLSTIVNVAAITNDKAVDVDEE	2	Ind		1	526	1	538	1	548	1	XC-contig_4	0.006	hypothetical protein	uc	NR	1e-25	50.8	hypothetical protein	1E-025	gi|291241551	120	84	169	66	50	29	0	85	5	1	2	N
cf-contig_366	1	hypothetical protein AaeL_AAEL002797 Aedes aegypti	1	Contig-366	Contig366	66.	.	64.1	440	N	1	P14-1189570_037_F05	440	459	333	SAVKMTSRQIVNVLKKNLSSSAALRNGTHSSSNQSPQQSSQSTQSVPLQNVTGLSSQIILKREGPIGPNDSKNEYKVKEYFCYDRSSYFQAEIEMAKYRLPQPSALKSEGK	3	Cyt		1	295	1	302	1	303	1	XC-contig_218	0.13	hypothetical protein AaeL_AAEL002797 Aedes aegypti	uc	NR	2e-14	97	hypothetical protein AaeL_AAEL002797	2E-014	gi|157132071	82.8	99	103	46	97	54	4	2	57	1	3	N
cf-contig_429	1	hypothetical protein AND_01233	1	Contig-429	Contig429	66.2	.	68.8	541	N	1	P17-1189943_030_B04	541	560	267	AGGAEFYQNFIDGDRTIAEFCHQEVEPMYKESDHIHIIAICTALKSGVRVEYMDRGDGGQVIAHDFPDGIKPSVHLLYRPGHYDILYPI	1	Cyt		1	348	1	357	1	361	1	XC-contig_135	0.23	hypothetical protein AND_01233	uc	NR	6e-39	31.3	hypothetical protein AND_01233	6E-039	gi|312385049	164	84	271	88	31	10	0	183	10	1	1	N
cf-contig_603	1	hypothetical protein AND_13780	1	Contig-603	Contig603	64.2	.	70.3	351	N	1	P5-1188785_090_D12	351	370	246	RGAKALGKTPAQLTLRWNLQLGNIVIPKSVTKSRIAENFNIFDFELSEDDMECFSKLDENYRTVPMTGALGHKHHPFENEEF	3	Ind		1	490	1	502	1	512	1	XC-contig_198	0.26	hypothetical protein AND_13780	uc	NR	6e-21	25.1	hypothetical protein AND_13780	6E-021	gi|312375734	104	79	318	60	25	32	0	239	9	1	3	N
cf-contig_369	1	hypothetical protein SINV_00679	1	Contig-369	Contig369	64.6	.	72.7	376	N	1	P14-1189577_086_F12	376	395	219	RPGTEGASVAIEMQEYERERDRCPMHFDDGSNPWVQSENYIKVFNFGFFRSASPKLCMSLLTLVVSFLLSMKA	1	Cyt		1	298	1	305	1	306	1	XC-contig_156	0.002	hypothetical protein SINV_00679	uc	NR	2e-15	7.2	hypothetical protein SINV_00679	2E-015	gi|322783932	86.3	43	604	79	7	9	0	537	10	1	1	N
cf-contig_489	1	hypothetical protein TcasGA2_TC001324	1	Contig-489	Contig489	61.4	.	65.7	770	N	1	P19-1190197_036_G06	770	789	450	PRAEAKAIKEQIHVIIYIAELIATDPRLAMRKARELWHGLSLDEPENQARPDTLEQLLVMLARESARRLVHLVNYAGEGVSNLPRSTAAHIQVGLHRCMAFGDAILKERLAMFLAGREQEIKKAAKRTRHINNHTENNMNGVQQSYVLTI	2	Cyt		1	81	2	73	2	67	2	XC-contig_252	0.34	hypothetical protein TcasGA2_TC001324	uc	NR	2e-26	40.3	hypothetical protein TcasGA2_TC001324	2E-026	gi|270002313	124	150	379	45	40	83	10	227	8	1	2	N
cf-contig_758	1	large subunit GTPase 1 homolog	1	Contig-758	Contig758	52.6	.	64.1	589	N	1	P11-1189294_035_G05	589	608	522	AGAGEDPDRAPVAEEVLNAYGYNRGFMTANGQPDCPRSARYILKDYVNGKLLYCYAPPNMKQDEYHIFPERKAKVNLDRVLPPREQRAIKIGKMTSADLDKQFFIKNTQAAHIKGKLPVNPKLIQQNDGGNSSSMGSKDSLITIVEKPWKLHNKHANKKKKEKLRRVYSHLDQH	1	Cyt		1	610	1	630	1	644	1	XC-contig_102	0.23	large subunit GTPase 1 homolog	uc	NR	2e-49	27.2	large subunit GTPase 1 homolog	2E-049	gi|340717356	199	169	627	57	27	73	0	458	10	1	1	N
cf-contig_331	1	Luehdorfia chinensis mitochondrion partial genome	1	Contig-331	Contig331	45.	.	72.2	107	N	1	P1-1152497_078_B10	107	126	90	GGWGIGHLRPGNHRFIPIVIERILINSFIK	1	Ind		1	267	1	273	1	272	1	XC-contig_123	6e-09	Luehdorfia chinensis mitochondrion partial genome	uc	MIT-PLA	5e-16	0.4	cytochrome oxidase subunit II	0.077	gi|343409604	40.8	23	227	83	11	4	0	203	34	1	1	N	4.348
cf-contig_202	1	Polyadenylate-binding protein Pediculus humanus corporis	1	Contig-202	Contig202	65.7	.	57.6	325	N	1	CAFL_P1-057_D07	325	344	237	GRSPVCFLRSTILNSCTCWSITKVLKPRWRKLLLYYRHIKQSKPRLRTVRLRRSKEPHDKLPAINFPWLHLFATLLAVS	3	Cyt		1	49	2	42	2	39	2	XC-contig_89	0.86	Polyadenylate-binding protein Pediculus humanus corporis	uc	NR	1e-15	8.3	Polyadenylate-binding protein, putative	1E-015	gi|242025596	87	52	637	81	8	10	0	580	2	1	2	N
cf-contig_688	1	probable nucleolar GTP-binding protein 1-like	1	Contig-688	Contig688	65.8	.	60	516	N	1	P9-1188475_012_C02	516	535	381	GAKVRERSVSRLRSEMENLGVDMSGTENANFTKTKSRSRSVSKPSAKRVRMDVSESRTQSRSRSVPRDEQGVKDVIMKKKLKAMAHKAISKKVKKMGLKGEADRFIGNKMPKHLFSGKRGVGSTDRR	3	Cyt		1	561	1	576	1	588	1	XC-contig_58	0.062	probable nucleolar GTP-binding protein 1-like	uc	NR	2e-40	19.9	probable nucleolar GTP-binding protein 1-like	2E-040	gi|350413635	169	125	637	66	20	42	1	512	6	1	3	N
cf-contig_206	2	Protein of unknown function	2	Contig-206	Contig206	74.9	.	69.7	843	N	2	P10-1189203_068_G10	843	862	234	AGQGQAYCTDTECIDEFPGAPYSAQPSNFTMMALLFAFAILMYMFQPNRNRNTDEVGLVKNSSALDQDQPPPPPPSVN	3	Cyt		2	51	2	44	2	41	2	XC-contig_227	1e-45	Protein of unknown function	uc	PFAM	4e-15	78.6	conserved hypothetical protein	1E-006	gi|242008684	58.9	75	105	39	72	46	3	28	9	1	3	N
cf-contig_756	1	Protein of unknown function	1	Contig-756	Contig756	61.9	0.2	65.2	490	N	1	P11-1189289_086_F12	490	509	348	GGWXNRHYGRGSCKKLDVLLCDENSECCILTPGDGNYHEIEPVNGSAAFLDILSPPYDAFIEEFGQRDCTYYKEESEIKPNLVQLTQIRQPAWFWCDTAQYSGPLLSLTEENTISQ	1	Cyt		1	608	1	628	1	642	1	XC-contig_50	0.08	Protein of unknown function	uc	PFAM	2e-21	48.4	similar to 2-aminoethanethiol (cysteamine) dioxygenase	8E-018	gi|91090992	94	87	227	45	39	48	0	140	58	1	1	N
cf-contig_430	1	Uncharacterized conserved protein	1	Contig-430	Contig430	60.3	.	70.8	324	N	1	P17-1189950_093_B11	324	343	156	GAGGIGITAGGSKIGRGLDYFKKPKYKFGLGQNDQDYRECYETNIDIIYIKN	2	Ind		1	349	1	358	1	362	1	XC-contig_155	0.24	Uncharacterized conserved protein	uc	KOG	2e-10	16.1	MIT domain-containing protein 1	4E-007	gi|318085127	58.5	39	246	60	16	16	0	203	38	1	2	N
cf-contig_377	1	Conserved protein with signal anchor - Membrane anchor detected	1	Contig-377	Contig377	65.	.	68.3	463	N	1	P14-1189598_065_H09	463	482	321	PGNKSGEIVAYSESAIRNNAAIFEYCRTSMSALSGGTAGVLGLTSFHGFGFYLLAVLGLWAMLLWKAGSNWQKYFVCRRSLLTNGFLGGLCTYILFWTFLYGMVHVY	3	Anch		1	306	1	313	1	314	1	XC-contig_202	0.1	Conserved protein with signal anchor - Membrane anchor detected	uc/anchor membrAnchor	KOG	6e-44	91	hypothetical protein AaeL_AAEL005414	6E-044	gi|157109866	180	104	115	79	91	22	0	11	9	1	3	N
Transposable element
cf-contig_682	1	Outcast_Ele5_ORF1 -h 1e-40 -j 4	1	Contig-682	Contig682	51.8	.	64.8		N	1	P9-1188459_080_A10		1008	741	ETAEIIMIAKPNKNHHTASSYRPISLLSILSKILERLLLQRLSEDHPNDSWIPHHQFGFRKNHSTIQQCNRTVSCILEAMNRKEHSVAVFLDVSQAFDKVWHSGLLYKIKTTFPNYFNILSSYLLNRKFRIKIKDVTSSIRNIECGVPQGSVLSPVLYLLFTNDMPTDDLLTICTYADDIAIISCNSDIRTATCQLQNYLSSLEKWFLDWNIKINIEKSQHIIVFSKTSQQSTYHHEQFNNSTMQFC	2	Cyt		1	93	2	570	1	582	1	XC-contig_27	0.24	Outcast_Ele5_ORF1 -h 1e-40 -j 4	te	TE-CLASS	1e-31	20	reverse transcriptase (put.); putative	2E-087	gi|157344	228	324	858	52	38	105	1	494	26	2	2	Y
cf-contig_244	2	RTE_Ele1_ORF1 -h 1e-60 -j 4	2	Contig-244	Contig244	60.2	.	67.5	855	N	2	P18-1190104_067_G09	861	874	411	YRFFLSSTECVKYLGMHLDRRLTWKDHIRAKLNTIKIKTAELYWLLGRKSILSIDNKLLIYKAVIKPIWTYGIELWGCASKSKIALMQRAQSKILRQITDAPWYVSNKILHDDLHIDFINRIIQINSMKHFQKLQHH	2	Cyt		2	193	1	196	1	194	1	XC-contig_79	0.041	RTE_Ele1_ORF1 -h 1e-60 -j 4	te	TE-CLASS	6e-22	15.8	GK24003	4E-035	gi|195463775	153	156	179	47	88	83	2	14	179	1	2	N	0.641
cf-contig_739	1	RTE_Ele1_ORF1 -h 1e-60 -j 4	1	Contig-739	Contig739	59.2	.	69	898	N	1	P11-1189231_014_B02	898	917	672	PGDDIAIISCNSDIRTATCQLQNYLSSLEKWFLDWNIKINIEKSQHIIVSLKHHNSPPIIMNNSIIPLCNSVKYLGMHIDSKLTWRTHIEYKKKQIQLKIKDFYWLFGRKSEISLDNKVFLYKTIIVPIWTYGIELWGCSCKSNINIIQRCQNKILRILTNAPWYISNFCLHKDLKISTVNEMIKIRSSSFNNKLIQHTNPTIQAIQRPIRRLSKKWPSDLPNS	1	Cyt		1	93	2	615	1	629	1	XC-contig_246	0.002	RTE_Ele1_ORF1 -h 1e-60 -j 4	te	TE-CLASS	6e-34	23.8	putative reverse transcriptase	3E-052	gi|42397986	210	218	888	44	25	122	0	667	7	1	1	N
Unknown products
cf-contig_143	3	Hypothetical secreted protein precursor - signalP detected	3	Contig-143	Contig143	70.1	.	69.4	471	N	3	P6-1188896_021_F03	479	494	339	GRGANKKYKKAGGYGDDQHHEDDQTDGHTSLGSLDMDHVDEDGQEDQNDQIGHHDVGSEEHTEEEEDEDYDEGEGYDEGEDYDKGADYDVHIPPDDSHDYEGNDKRIPFYNPK	3	BL	1,	3	138	1	135	1	132	1	XC-contig_169	1e-14	Hypothetical secreted protein precursor - signalP detected	s/	Sigp			predicted protein	2E-009	gi|156353450	66.2	152	153	40	100	51	0	1	40	7	-3	Y
cf-contig_9	1	Unknown product	1	Contig-9	Contig9	62.9	.	78.1	136	N	1	CAFM_P2-061_B07	136	155	63	EALIFPILIVVKNINTFLICL	1	Ind		1	2	11	1	11	1	11	XC-contig_248	0.67	Unknown product	uk
cf-contig_82	1	Unknown product	1	Contig-82	Contig82	63.	.	79.6	187	N	1	P19-1190151_060_C08	187	206	87	LDIEIIWVALDCKILSNKNTNRNKKKKKK	1	Ind		1	112	1	107	1	102	1	XC-contig_112	0.086	Unknown product	uk
cf-contig_166	1	Unknown product	1	Contig-166	Contig166	30.	4	59	81	N	1	P5-1188796_087_E11	81	100	60	GGWXIGHYXAGTENHDHLAE	2	Ind		1	12	4	38	2	148	1	XC-contig_112	1.2	Unknown product	uk
cf-contig_193	4	Unknown product	4	Contig-193	Contig193	79.2	.	73.6	90	N	4	P3-1188558_013_B01	113	110	75	KELQEILVILYYNKHLFLVKKKKKK	1	Ind		4	164	1	166	1	164	1	XC-contig_85	8e-05	Unknown product	uk
cf-contig_224	1	Unknown product	1	Contig-224	Contig224	51.3	.	73.3	71	N	1	P17-1189973_074_D10	71	90	60	RPGEHNVHNIPMNQIKKLHK	1	Ind		1	180	1	183	1	181	1	XC-contig_155	0.18	Unknown product	uk
cf-contig_248	1	Unknown product	1	Contig-248	Contig248	59.7	0.7	77.2	117	N	1	CAFM_P2-016_A02	117	136	69	SLIATKKNHNNPQIYSNLNKKLL	3	Ind		1	196	1	199	1	197	1	XC-contig_141	0.21	Unknown product	uk
cf-contig_253	1	Unknown product	1	Contig-253	Contig253	55.6	.	69.8	97	N	1	CAFM_P2-013_B01	97	116	75	GEITKGHVYVTKHMFMDELNIDVSK	2	Ind		1	201	1	204	1	202	1	XC-contig_196	0.056	Unknown product	uk
cf-contig_255	1	Unknown product	1	Contig-255	Contig255	56.7	0.5	79.1	187	N	1	CAFM_P2-045_B05	187	206	84	CSYFVRNSNNIVSDCIYYLYKKIKYTPP	2	Ind		1	203	1	206	1	204	1	XC-contig_160	0.19	Unknown product	uk
cf-contig_256	1	Unknown product	1	Contig-256	Contig256	46.3	0.8	77.2	104	N	1	CAFM_P2-046_B06	104	123	60	ECEXFRAVCVFKLRITKNKI	2	Ind		1	204	1	207	1	205	1	XC-contig_57	0.31	Unknown product	uk
cf-contig_257	1	Unknown product	1	Contig-257	Contig257	37.8	4.4	57.8	71	N	1	CAFM_P2-062_B08	71	90	87	VNXRRCHXHXPAWVTEQERPWSLKKKKKK	2	Ind		1	205	1	208	1	206	1	XC-contig_185	8.1	Unknown product	uk
cf-contig_258	1	Unknown product	1	Contig-258	Contig258	42.6	1.1	75.8	72	N	1	CAFM_P2-078_B10	72	91	87	STSQNVXCVNILVVLFKNKFLIPKKKKKK	1	Ind		1	206	1	209	1	207	1	XC-contig_53	0.65	Unknown product	uk
cf-contig_259	1	Unknown product	1	Contig-259	Contig259	35.3	.	78.3	50	N	1	CAFM_P2-012_C02	50	69	66	RNSKKDELDHGVYIYNKKKKKK	2	Ind		1	207	1	210	1	208	1	XC-contig_106	0.49	Unknown product	uk
cf-contig_260	1	Unknown product	1	Contig-260	Contig260	59.2	.	79	124	N	1	CAFM_P2-043_C05	124	143	78	NFYFVLLNLLFIGRNNNHYSISTTNT	2	Ind		1	208	1	211	1	209	1	XC-contig_9	0.084	Unknown product	uk
cf-contig_262	1	Unknown product	1	Contig-262	Contig262	41.6	.	85.1	55	N	1	CAFM_P2-060_C08	55	74	63	RKKSNLIRNKVKKNMPKKKKK	2	Ind		1	209	1	213	1	211	1	XC-contig_165	0.015	Unknown product	uk
cf-contig_263	1	Unknown product	1	Contig-263	Contig263	36.6	1.2	75.6	63	N	1	CAFM_P2-075_C09	63	82	66	LIGIQFRNXREIYRFAKKKKKK	1	Ind		1	210	1	214	1	212	1	XC-contig_75	0.18	Unknown product	uk
cf-contig_265	1	Unknown product	1	Contig-265	Contig265	38.	.	74.2	47	N	1	CAFM_P2-092_C12	47	66	45	GEHLMLINRLVESTI	1	Ind		1	212	1	216	1	214	1	XC-contig_75	1.5	Unknown product	uk
cf-contig_268	1	Unknown product	1	Contig-268	Contig268	48.9	.	75.2	94	N	1	CAFM_P2-041_D05	94	113	87	WKELLGFLISIQATDNLYVNLNQFYNNPW	3	Ind		1	214	1	218	1	217	1	XC-contig_33	0.35	Unknown product	uk
cf-contig_272	1	Unknown product	1	Contig-272	Contig272	49.	.	74.8	124	N	1	CAFM_P2-055_E07	124	143	141	FLTDNYFPITRKYFIGSKTSILGRFYDISQSIIIYVNLTHRKKKKKK	1	Ind		1	216	1	221	1	220	1	XC-contig_160	0.77	Unknown product	uk
cf-contig_274	1	Unknown product	1	Contig-274	Contig274	30.8	.	86.8	57	N	1	CAFM_P2-005_F01	57	76	54	YINAIHFLKIMYNKKKKK	3	Ind		1	218	1	223	1	222	1	XC-contig_140	0.66	Unknown product	uk
cf-contig_275	1	Unknown product	1	Contig-275	Contig275	33.5	.	68.3	41	N	1	CAFM_P2-037_F05	41	60	57	LRIQSMSSTRQSEKKKKKK	2	Ind		1	219	1	224	1	223	1	XC-contig_57	1.1	Unknown product	uk
cf-contig_276	1	Unknown product	1	Contig-276	Contig276	42.2	3.1	72.7	109	N	1	CAFM_P2-054_F08	109	128	78	ERTSXAFXRFXKDXFETIELNYLVYF	3	Ind		1	220	1	225	1	224	1	XC-contig_72	0.86	Unknown product	uk
cf-contig_278	1	Unknown product	1	Contig-278	Contig278	45.2	1.7	69.2	98	N	1	CAFM_P2-086_F12	98	117	111	GGIRPXYGRDITELILNSVLALINYNKLINTVKKKKK	3	Ind		1	222	1	227	1	226	1	XC-contig_125	1.3	Unknown product	uk
cf-contig_279	1	Unknown product	1	Contig-279	Contig279	39.5	.	86	38	N	1	CAFM_P2-052_G08	38	57	30	LVLIKKKKKK	2	Ind		1	223	1	228	1	227	1	XC-contig_253	0.6	Unknown product	uk
cf-contig_280	1	Unknown product	1	Contig-280	Contig280	43.	.	57.6	66	N	1	CAFM_P2-083_G11	66	85	66	DCATGAPAWGDRVRLSKKKKKK	1	Ind		1	224	1	229	1	228	1	XC-contig_70	0.9	Unknown product	uk
cf-contig_282	1	Unknown product	1	Contig-282	Contig282	27.3	.	81	39	N	1	CAFM_P2-034_H06	39	58	51	ATYYIRNKVISCKKKKK	3	Ind		1	226	1	231	1	230	1	XC-contig_77	4.1	Unknown product	uk
cf-contig_283	1	Unknown product	1	Contig-283	Contig283	55.6	1.2	73.3	142	N	1	CAFM_P2-050_H08	142	161	99	GINRRSGHXTAGITTKIKTNFFQNEQLNKCTRQ	1	Ind		1	227	1	232	1	231	1	XC-contig_158	0.15	Unknown product	uk
cf-contig_284	1	Unknown product	1	Contig-284	Contig284	46.1	0.9	66.1	90	N	1	CAFM_P2-065_H09	90	109	75	QLVSTQXWPFTAGENRFVIVCANKK	3	Ind		1	228	1	233	1	232	1	XC-contig_41	0.048	Unknown product	uk
cf-contig_286	1	Unknown product	1	Contig-286	Contig286	56.6	1.7	70	41	N	1	CAFL_P1-016_A02	41	60	42	RMIEENIIPKKKKK	3	Ind		1	229	1	234	1	233	1	XC-contig_120	2.9	Unknown product	uk
cf-contig_293	1	Unknown product	1	Contig-293	Contig293	52.3	.	69.6	60	N	1	CAFL_P1-012_C02	60	79	39	NDMTRAAKKKKKK	1	Ind		1	235	1	240	1	239	1	XC-contig_27	0.66	Unknown product	uk
cf-contig_294	1	Unknown product	1	Contig-294	Contig294	48.5	1.1	67.8	68	N	1	CAFL_P1-027_C03	68	87	81	NTKTHSTRXGVGKTKYHLISKRKKKKK	3	Ind		1	236	1	241	1	240	1	XC-contig_7	0.004	Unknown product	uk
cf-contig_296	1	Unknown product	1	Contig-296	Contig296	34.8	2.7	73.3	56	N	1	CAFL_P1-059_C07	56	75	72	KKICQLMCYYXYGNKXEAQKKKKK	1	Ind		1	238	1	243	1	242	1	XC-contig_222	1.2	Unknown product	uk
cf-contig_300	1	Unknown product	1	Contig-300	Contig300	56.3	.	67	84	N	1	CAFL_P1-010_D02	84	103	90	EERSNAIKQDSQLEALSTHSHTNTAKKKKK	3	Ind		1	241	1	246	1	245	1	XC-contig_60	0.055	Unknown product	uk
cf-contig_301	1	Unknown product	1	Contig-301	Contig301	59.1	.	73.1	156	N	1	CAFL_P1-025_D03	156	175	111	FYYFYLTNIFHLIKLLVFINFLTSLRASYGNRKKKKK	3	Ind		1	242	1	247	1	246	1	XC-contig_103	0.035	Unknown product	uk
cf-contig_319	1	Unknown product	1	Contig-319	Contig319	53.8	.	68.6	118	N	1	CAFL_P1-019_G03	118	137	69	SQVDIEDSDIGIVLQDYRKKKKK	2	Ind		1	257	1	263	1	262	1	XC-contig_167	1.4	Unknown product	uk
cf-contig_322	1	Unknown product	1	Contig-322	Contig322	34.3	1.6	68.9	42	N	1	CAFL_P1-002_H02	42	61	54	SFNLTGTQKGPXRKKKKK	3	Ind		1	259	1	265	1	264	1			Unknown product	uk
cf-contig_326	1	Unknown product	1	Contig-326	Contig326	34.	.	67.4	76	N	1	P1-1152487_096_A12	76	95	60	GPGESGHYGRVLRIYVIDMK	1	Ind		1	263	1	269	1	268	1	XC-contig_193	0.095	Unknown product	uk
cf-contig_332	1	Unknown product	1	Contig-332	Contig332	22.5	.	52.5	40	N	1	P1-1152499_094_B12	40	59	57	EGRRYIGINGRGHKKKKKK	1	Ind		1	268	1	274	1	273	1	XC-contig_79	0.6	Unknown product	uk
cf-contig_333	1	Unknown product	1	Contig-333	Contig333	36.4	0.8	61.8	104	N	1	P1-1152510_091_C11	104	123	84	GAAESAXTAGEPTDVVLYPCLQFFNIIY	2	Ind		1	68	2	60	2	57	2	XC-contig_129	0.55	Unknown product	uk
cf-contig_334	1	Unknown product	1	Contig-334	Contig334	33.6	1.6	64.5	105	N	1	P1-1152514_025_D03	105	124	96	GARAIRAXYGRELVSVNCKFRGYYKWLDNIFM	3	Ind		1	269	1	275	1	274	1	XC-contig_218	1	Unknown product	uk
cf-contig_335	1	Unknown product	1	Contig-335	Contig335	28.1	1.8	62.8	94	N	1	P1-1152530_055_E07	94	113	63	IXFDWLVHLFKIKLXEKKKKK	3	Ind		1	270	1	276	1	275	1	XC-contig_236	3.2	Unknown product	uk
cf-contig_336	1	Unknown product	1	Contig-336	Contig336	30.2	.	56.9	104	N	1	P1-1152532_071_E09	104	123	93	GARGIRHYGRVVIRFHSIPKYSSSSKPDSKS	1	Ind		1	271	1	277	1	276	1	XC-contig_196	2.7	Unknown product	uk
cf-contig_339	1	Unknown product	1	Contig-339	Contig339	48.2	.	71.3	145	N	1	P1-1152541_038_F06	145	164	81	FLGASGHLRPGRRKRLVFRITCHQASF	3	Ind		1	273	1	279	1	278	1	XC-contig_132	0.11	Unknown product	uk
cf-contig_340	1	Unknown product	1	Contig-340	Contig340	27.3	2.1	61.9	78	N	1	P1-1152546_085_F11	78	97	96	GGMGIRAXXGRGDCSIILLMNKNSDAKKKKKK	1	Ind		1	69	2	61	2	58	2	XC-contig_100	0.46	Unknown product	uk
cf-contig_344	1	Unknown product	1	Contig-344	Contig344	39.6	2	69.3	82	N	1	P1-1152556_067_G09	82	101	51	GMGIRHYXAGENSQITN	3	Ind		1	70	2	62	2	282	1	XC-contig_201	1.2	Unknown product	uk
cf-contig_345	1	Unknown product	1	Contig-345	Contig345	27.4	2.1	47.9	77	N	1	P1-1152558_083_G11	77	96	93	RGGIRAXYGREAVGINAVVSXSRPGEKKKKK	1	Ind		1	277	1	283	1	283	1	XC-contig_193	0.87	Unknown product	uk
cf-contig_347	1	Unknown product	1	Contig-347	Contig347	27.3	.	56.7	41	N	1	P1-1152561_002_H02	41	60	57	GGRGNRSSTAGFVKKKKKK	2	Ind		1	279	1	285	1	285	1	XC-contig_19	3.5	Unknown product	uk
cf-contig_348	1	Unknown product	1	Contig-348	Contig348	31.6	3.6	66.7	92	N	1	P1-1152562_017_H03	92	111	90	GGHGHSGXXXPGVDKYGIKLIKNINKYKXV	1	Ind		1	280	1	286	1	286	1	XC-contig_3	0.17	Unknown product	uk
cf-contig_350	1	Unknown product	1	Contig-350	Contig350	26.1	.	61.3	56	N	1	P1-1152567_050_H08	56	75	48	GPGKSGHLRPGMNKAV	1	Ind		1	26	3	288	1	288	1	XC-contig_193	1.2	Unknown product	uk
cf-contig_351	1	Unknown product	1	Contig-351	Contig351	23.6	.	62.5	37	N	1	P1-1152569_066_H10	37	56	54	LCLRNRAFTAGAKKKKKK	1	Ind		1	282	1	289	1	289	1	XC-contig_100	7.7	Unknown product	uk
cf-contig_359	1	Unknown product	1	Contig-359	Contig359	51.2	0.9	73.7	95	N	1	P14-1189531_012_C02	95	114	63	INFFLIINFNNTXWVQKKKKK	1	Ind		1	289	1	296	1	297	1	XC-contig_46	0.2	Unknown product	uk
cf-contig_360	1	Unknown product	1	Contig-360	Contig360	28.7	.	55.7	60	N	1	P14-1189537_060_C08	60	79	54	GGLGDRAITAGEVKSEKE	1	Ind		1	5	5	5	5	10	4	XC-contig_41	0.35	Unknown product	uk
cf-contig_362	1	Unknown product	1	Contig-362	Contig362	26.4	.	54.4	38	N	1	P14-1189540_091_C11	38	57	54	GASAIGHLRPGHKKKKKK	2	Ind		1	291	1	298	1	299	1	XC-contig_25	2.2	Unknown product	uk
cf-contig_365	1	Unknown product	1	Contig-365	Contig365	40.4	1.3	76.3	57	N	1	P14-1189561_056_E08	57	76	69	GIVKWAEMIANKKKIIXGKKKKK	3	Ind		1	294	1	301	1	302	1	XC-contig_149	0.91	Unknown product	uk
cf-contig_372	1	Unknown product	1	Contig-372	Contig372	51.7	.	77.4	105	N	1	P14-1189588_083_G11	105	124	96	IKYTFVLYILYTNDIAILNNNIKLNTKKKKKK	1	Ind		1	301	1	308	1	309	1	XC-contig_132	0.034	Unknown product	uk
cf-contig_380	1	Unknown product	1	Contig-380	Contig380	44.3	0.8	70.3	109	N	1	P15-1189754_061_B07	109	128	87	GRXNRALRPGKRLYMNCYCNIIMTNIYSQ	3	Ind		1	309	1	316	1	317	1	XC-contig_122	0.093	Unknown product	uk
cf-contig_386	1	Unknown product	1	Contig-386	Contig386	36.	3	69.3	82	N	1	P15-1189762_027_C03	82	101	96	RAXYGRGVVLDCKILSNKNTNXKQNXEKKKKK	3	Ind		1	314	1	322	1	323	1	XC-contig_96	2.2	Unknown product	uk
cf-contig_391	1	Unknown product	1	Contig-391	Contig391	39.7	.	78	40	N	1	P15-1189782_089_D11	40	59	54	GLVRRNKKLQKKSKKKKK	2	Ind		1	319	1	327	1	328	1	XC-contig_121	0.32	Unknown product	uk
cf-contig_395	1	Unknown product	1	Contig-395	Contig395	47.8	.	76.2	86	N	1	P15-1189796_005_F01	86	105	102	GFQKQKLFVFVVFIIEHKSKFIIGESNGKKKKKK	2	Ind		1	322	1	330	1	331	1	XC-contig_40	0.3	Unknown product	uk
cf-contig_397	1	Unknown product	1	Contig-397	Contig397	31.8	3.5	65.2	96	N	1	P15-1189802_053_F07	96	115	81	GGLAKSALXXRGHLRKWNKLYXLQIKS	1	Ind		1	324	1	332	1	333	1	XC-contig_26	0.26	Unknown product	uk
cf-contig_408	1	Unknown product	1	Contig-408	Contig408	64.9	.	90.7	78	N	1	P16-1189843_096_A12	78	97	39	KMNTIKTKIINNV	3	Ind		1	334	1	342	1	343	1	XC-contig_150	0.13	Unknown product	uk
cf-contig_410	1	Unknown product	1	Contig-410	Contig410	27.6	3.5	60.5	67	N	1	P16-1189858_027_C03	67	86	48	PFSRINQNXCKKKKKK	1	Ind		1	12	4	38	2	345	1	XC-contig_45	2.3	Unknown product	uk
cf-contig_441	1	Unknown product	1	Contig-441	Contig441	58.3	.	74.2	101	N	1	P17-1189992_037_F05	101	120	87	GGTSRSHHKTMMMLKMLNKCKIFMIIKYK	3	Ind		1	357	1	366	1	371	1	XC-contig_60	0.15	Unknown product	uk
cf-contig_450	1	Unknown product	1	Contig-450	Contig450	33.	.	83.5	66	N	1	P18-1190040_045_B05	66	85	42	RAYSNLIYCKTLKN	3	Ind		1	364	1	373	1	378	1	XC-contig_160	0.47	Unknown product	uk
cf-contig_471	1	Unknown product	1	Contig-471	Contig471	47.2	2.4	65.4	108	N	1	P19-1190125_048_A06	108	127	78	RGEXGIXXPGTDVVLYPCLQFFNIIY	2	Ind		1	68	2	60	2	57	2	XC-contig_129	0.63	Unknown product	uk
cf-contig_478	1	Unknown product	1	Contig-478	Contig478	25.4	1.7	51.7	41	N	1	P19-1190162_057_D07	41	60	57	GGAGESGHYXAGRQKKKKK	1	Ind		1	5	5	5	5	10	4	XC-contig_243	3.6	Unknown product	uk
cf-contig_480	1	Unknown product	1	Contig-480	Contig480	57.7	.	77.3	100	N	1	P19-1190176_071_E09	100	119	84	DAWTLLIRLELYKPSMFLFSYVIYLNKI	3	Ind		1	390	1	399	1	404	1	XC-contig_139	0.11	Unknown product	uk
cf-contig_486	1	Unknown product	1	Contig-486	Contig486	27.5	1.8	66.7	95	N	1	P19-1190192_003_G01	95	114	66	IIXLNNIXLEIKWLISKKKKKK	2	Ind		1	396	1	405	1	410	1	XC-contig_133	0.66	Unknown product	uk
cf-contig_493	1	Unknown product	1	Contig-493	Contig493	44.5	2	61.8	83	N	1	P19-1190205_002_H02	83	102	99	PGCXRECFVLCCLSIVRKLVENXCVLTKKKKKK	2	Ind		1	401	1	410	1	415	1	XC-contig_72	0.05	Unknown product	uk
cf-contig_494	1	Unknown product	1	Contig-494	Contig494	21.	2.1	76	77	N	1	P19-1190208_033_H05	77	96	66	TXPGLLEFIVYHFNMRMNKAII	1	Ind		1	402	1	411	1	416	1	XC-contig_191	0.34	Unknown product	uk
cf-contig_495	1	Unknown product	1	Contig-495	Contig495	43.1	1	75.2	82	N	1	P20-1190219_032_A04	82	101	63	XFAHKLIELKFNYYWGKKKKK	2	Ind		1	403	1	412	1	417	1	XC-contig_15	0.58	Unknown product	uk
cf-contig_496	1	Unknown product	1	Contig-496	Contig496	36.9	2.1	59.9	123	N	1	P20-1190222_063_A07	123	142	90	KDIREIVNIYCYSSEFGIYMVYXAEKKKKK	2	Ind		1	404	1	413	1	418	1	XC-contig_132	0.3	Unknown product	uk
cf-contig_500	1	Unknown product	1	Contig-500	Contig500	50.1	1.1	70.7	155	N	1	P20-1190241_012_C02	155	174	129	GPLXGREIVINDWRRIAIINMSFICNLYIFFVHSRLPIHFNVI	1	Ind		1	408	1	417	1	422	1	XC-contig_80	0.065	Unknown product	uk
cf-contig_504	1	Unknown product	1	Contig-504	Contig504	22.1	.	54.2	40	N	1	P20-1190260_073_D09	40	59	57	GGGVIVPITCRGIKKKKKK	1	Ind		1	412	1	421	1	426	1	XC-contig_51	2.2	Unknown product	uk
cf-contig_506	1	Unknown product	1	Contig-506	Contig506	21.1	1.6	55.6	44	N	1	P20-1190280_037_F05	44	63	60	GGLWASCHYXAGYDKKKKKK	2	Ind		1	5	5	5	5	10	4	XC-contig_6	2.1	Unknown product	uk
cf-contig_511	1	Unknown product	1	Contig-511	Contig511	46.	1.2	73.5	64	N	1	P20-1190303_018_H04	64	83	39	GDKCQCLSXVYSE	2	Ind		1	82	2	74	2	68	2	XC-contig_21	2.3	Unknown product	uk
cf-contig_512	1	Unknown product	1	Contig-512	Contig512	47.2	2.2	58.8	117	N	1	P20-1190305_034_H06	117	136	99	GLGXXXITAGVGPDNKFDLAVSTVYYVWKLRII	3	Ind		1	417	1	426	1	431	1	XC-contig_167	0.27	Unknown product	uk
cf-contig_517	1	Unknown product	1	Contig-517	Contig517	56.7	.	76.3	205	N	1	P2-1190398_029_B03	205	224	66	FCMIQCDTIIVKSYIKILINIK	1	Ind		1	422	1	431	1	436	1	XC-contig_45	0.25	Unknown product	uk
cf-contig_519	1	Unknown product	1	Contig-519	Contig519	57.6	.	72	99	N	1	P2-1190409_012_C02	99	118	96	YKKRNECSSVLSCTSVLYSIKCIISLKKKKKK	1	Ind		1	424	1	433	1	438	1	XC-contig_158	0.2	Unknown product	uk
cf-contig_525	1	Unknown product	1	Contig-525	Contig525	58.4	.	68.5	105	N	1	P2-1190430_089_D11	105	124	99	SCKLINFPKCYCVNILWSYLRINFLYTKKKKKK	1	Ind		1	429	1	438	1	443	1	XC-contig_84	0.003	Unknown product	uk
cf-contig_529	1	Unknown product	1	Contig-529	Contig529	43.7	1.1	77.5	70	N	1	P2-1190441_072_E10	70	89	84	GTEKRKENKDKIKXLKYNIVENIKKKKK	2	Ind		1	432	1	442	1	447	1	XC-contig_74	0.47	Unknown product	uk
cf-contig_530	1	Unknown product	1	Contig-530	Contig530	26.9	.	53.3	41	N	1	P2-1190445_006_F02	41	60	57	GGQGNRAITGRVVKKKKKK	2	Ind		1	433	1	443	1	448	1	XC-contig_95	2.5	Unknown product	uk
cf-contig_535	1	Unknown product	1	Contig-535	Contig535	36.1	1.7	62.9	97	N	1	P2-1190467_084_G12	97	116	72	GAGNXXITAGDEDKMNNVWWLKML	3	Ind		1	83	2	75	2	453	1	XC-contig_187	1.3	Unknown product	uk
cf-contig_545	1	Unknown product	1	Contig-545	Contig545	55.8	0.9	77.6	88	N	1	P3-1188561_030_B04	88	107	72	AGXIYGLTYYKVIYYKIRNTFFRR	1	Ind		1	447	1	457	1	463	1	XC-contig_45	0.16	Unknown product	uk
cf-contig_546	1	Unknown product	1	Contig-546	Contig546	52.8	.	79.3	97	N	1	P3-1188574_043_C05	97	116	57	CIIKTSCEIKIIFKKKKKK	1	Ind		1	448	1	458	1	464	1	XC-contig_76	1.3	Unknown product	uk
cf-contig_550	1	Unknown product	1	Contig-550	Contig550	54.9	.	72.1	92	N	1	P3-1188598_039_E05	92	111	54	GRYHQGTDNLIHSKYHLL	3	Ind		1	85	2	77	2	70	2	XC-contig_184	0.028	Unknown product	uk
cf-contig_552	1	Unknown product	1	Contig-552	Contig552	29.8	3.4	60.2	69	N	1	P3-1188603_072_E10	69	88	54	GGWGIGHYXAGSDIHNIK	2	Ind		1	12	4	78	2	467	1	XC-contig_192	2.3	Unknown product	uk
cf-contig_553	1	Unknown product	1	Contig-553	Contig553	46.4	.	68.4	76	N	1	P3-1188606_005_F01	76	95	93	GRGLKKGKIRHHWALLFCKSCLYINKKKKKK	1	Ind		1	27	3	79	2	71	2	XC-contig_182	0.0001	Unknown product	uk
cf-contig_555	1	Unknown product	1	Contig-555	Contig555	62.2	.	73.5	117	N	1	P3-1188609_022_F04	117	136	81	NQVITRWNNRQFTQINNVYVTDNKNKC	1	Ind		1	452	1	462	1	469	1	XC-contig_46	1	Unknown product	uk
cf-contig_559	1	Unknown product	1	Contig-559	Contig559	47.3	.	82.5	38	N	1	P3-1188619_004_G02	38	57	39	IKSKRLKLKKKKK	3	Ind		1	456	1	466	1	473	1	XC-contig_108	4	Unknown product	uk
cf-contig_569	1	Unknown product	1	Contig-569	Contig569	25.	3.4	52.5	40	N	1	P4-1188653_096_A12	40	59	57	PGGWVIGHYXAGLKKKKKK	1	Ind		1	12	4	78	2	481	1			Unknown product	uk
cf-contig_573	1	Unknown product	1	Contig-573	Contig573	34.7	.	67.2	97	N	1	P4-1188676_091_C11	97	116	63	GGTVYGHYGRERRSDYINIMV	2	Ind		1	83	2	75	2	485	1	XC-contig_212	0.2	Unknown product	uk
cf-contig_574	1	Unknown product	1	Contig-574	Contig574	53.	.	73.8	84	N	1	P4-1188680_025_D03	84	103	48	GRGTRNVILAEISFVS	1	Ind		1	467	1	477	1	486	1	XC-contig_209	0.18	Unknown product	uk
cf-contig_581	1	Unknown product	1	Contig-581	Contig581	64.	.	72.3	158	N	1	P4-1188717_020_G04	158	177	129	TEVFYLYCGTSRDKSAVTSLYNRIICIIYYNKRFYLSKKKKKK	2	Ind		1	86	2	80	2	72	2	XC-contig_171	0.12	Unknown product	uk
cf-contig_585	1	Unknown product	1	Contig-585	Contig585	47.9	1.1	75.5	75	N	1	P4-1188732_049_H07	75	94	60	VEQQPPKNKCTXSLINKINL	3	Ind		1	41	2	487	1	496	1	XC-contig_90	0.019	Unknown product	uk
cf-contig_592	1	Unknown product	1	Contig-592	Contig592	37.4	0.8	62.8	110	N	1	P5-1188765_028_C04	110	129	81	GAGSSGHYGRGRAWVGKVITFRNCKID	2	Ind		1	482	1	493	1	502	1	XC-contig_165	0.86	Unknown product	uk
cf-contig_594	1	Unknown product	1	Contig-594	Contig594	58.	.	70.7	80	N	1	P5-1188775_010_D02	80	99	60	FVDMFALNTNFLQIIKKKKK	3	Ind		1	484	1	495	1	504	1	XC-contig_201	0.87	Unknown product	uk
cf-contig_599	1	Unknown product	1	Contig-599	Contig599	58.3	.	78	131	N	1	P5-1188781_058_D08	131	150	90	RPGINLYYVFFTIETTLFNLENKTTTYHIC	2	Ind		1	77	2	69	2	508	1	XC-contig_60	0.091	Unknown product	uk
cf-contig_613	1	Unknown product	1	Contig-613	Contig613	49.3	1	75	85	N	1	P6-1188837_032_A04	85	104	66	HDNISPKKVLYELLTLNNSKFX	2	Ind		1	499	1	511	1	521	1	XC-contig_103	0.51	Unknown product	uk
cf-contig_614	1	Unknown product	1	Contig-614	Contig614	46.	.	83.6	42	N	1	P6-1188845_096_A12	42	61	39	INKNDLYQKKKKK	2	Ind		1	500	1	512	1	522	1	XC-contig_234	1.1	Unknown product	uk
cf-contig_618	1	Unknown product	1	Contig-618	Contig618	40.6	.	84.3	51	N	1	P6-1188870_009_D01	51	70	36	PGEKKQNIYKIK	1	Ind		1	504	1	516	1	526	1	XC-contig_71	0.19	Unknown product	uk
cf-contig_621	1	Unknown product	1	Contig-621	Contig621	46.	1	79.6	79	N	1	P6-1188874_041_D05	79	98	60	YYFNIXVESNKNLIIKKKKK	2	Ind		1	507	1	519	1	529	1	XC-contig_129	0.63	Unknown product	uk
cf-contig_624	1	Unknown product	1	Contig-624	Contig624	47.	.	78.2	59	N	1	P6-1188894_005_F01	59	78	51	GRETCYSKLKYNIKINT	1	Ind		1	90	2	83	2	75	2	XC-contig_223	0.19	Unknown product	uk
cf-contig_625	1	Unknown product	1	Contig-625	Contig625	35.7	.	56.6	87	N	1	P6-1188895_006_F02	87	106	105	GGRVYRHLRPGTIGSTWVTIVHKCIPLLAKKKKKK	1	Ind		1	510	1	522	1	532	1	XC-contig_159	1.5	Unknown product	uk
cf-contig_631	1	Unknown product	1	Contig-631	Contig631	38.4	1.3	74	58	N	1	P6-1188920_017_H03	58	77	54	RAVSDCSIIWLMNKNXDA	3	Ind		1	69	2	61	2	58	2	XC-contig_209	1.7	Unknown product	uk
cf-contig_645	1	Unknown product	1	Contig-645	Contig645	34.9	1.1	69.3	69	N	1	P7-1188990_005_F01	69	88	78	HKWMELXECPGCLNNTIILGKKKKKK	1	Ind		1	60	2	53	2	550	1	XC-contig_86	1.7	Unknown product	uk
cf-contig_647	1	Unknown product	1	Contig-647	Contig647	42.2	.	83.2	130	N	1	P7-1189008_051_G07	130	149	60	GRVICMTKQNYKIVNIVLIV	1	Ind		1	529	1	541	1	552	1	XC-contig_129	0.071	Unknown product	uk
cf-contig_648	1	Unknown product	1	Contig-648	Contig648	54.8	.	80	106	N	1	P7-1189011_068_G10	106	125	72	PGESCYIFNVNVICNTLNLCILSN	3	Ind		1	530	1	542	1	553	1	XC-contig_250	0.23	Unknown product	uk
cf-contig_649	1	Unknown product	1	Contig-649	Contig649	53.1	.	75	189	N	1	P7-1189012_083_G11	189	208	66	AGGSKDAFLIRFLESRLNGILM	2	Ind		1	531	1	543	1	554	1	XC-contig_111	0.23	Unknown product	uk
cf-contig_657	1	Unknown product	1	Contig-657	Contig657	26.	1.7	55	41	N	1	P8-1189048_093_B11	41	60	57	GGWGNRAITXPGTKKKKKK	2	Ind		1	5	5	5	5	10	4	XC-contig_28	7.5	Unknown product	uk
cf-contig_658	1	Unknown product	1	Contig-658	Contig658	50.4	0.6	62.3	143	N	1	P8-1189058_075_C09	143	162	96	GGWXIGITAGIFTKKGTLLTNKLYFNGKKGLY	2	Ind		1	537	1	549	1	561	1	XC-contig_28	0.53	Unknown product	uk
cf-contig_665	1	Unknown product	1	Contig-665	Contig665	55.7	.	73.6	101	N	1	P8-1189074_007_E01	121	140	105	NTLNFIVNYHVKLLVQYIKQNKQKKKKKKKKKKKK	1	Ind		1	544	1	556	1	568	1	XC-contig_146	1.5	Unknown product	uk
cf-contig_667	1	Unknown product	1	Contig-667	Contig667	54.1	.	75.3	70	N	1	P8-1189084_087_E11	70	89	51	KKILINNNSTHKKKKKK	1	Ind		1	546	1	558	1	570	1	XC-contig_16	0.47	Unknown product	uk
cf-contig_670	1	Unknown product	1	Contig-670	Contig670	36.6	2.5	60.8	101	N	1	P8-1189088_021_F03	101	120	84	GGRGIGHYXAGGQMPMLKFVYXRVMNKK	1	Ind		1	82	2	74	2	68	2	XC-contig_136	0.71	Unknown product	uk
cf-contig_677	1	Unknown product	1	Contig-677	Contig677	48.8	0.9	79.5	93	N	1	P8-1189119_066_H10	93	112	84	QNVIXLDFANLYLFIKYIELKPKKKKKK	1	Ind		1	552	1	565	1	577	1	XC-contig_103	0.35	Unknown product	uk
cf-contig_689	1	Unknown product	1	Contig-689	Contig689	52.4	.	89.3	37	N	1	P9-1188476_027_C03	37	56	33	SKLKYNIKINT	3	Ind		1	90	2	83	2	75	2	XC-contig_119	1.1	Unknown product	uk
cf-contig_691	1	Unknown product	1	Contig-691	Contig691	55.5	.	78.7	108	N	1	P9-1188481_060_C08	108	127	105	LRPGETKKYSASLTVICILCNNLLDKLFKYIFFKK	2	Ind		1	563	1	578	1	590	1	XC-contig_213	0.019	Unknown product	uk
cf-contig_699	1	Unknown product	1	Contig-699	Contig699	58.6	.	78.6	84	N	1	P9-1188516_053_F07	84	103	51	RYLSKSLIRRSEKKKKK	2	Ind		1	569	1	584	1	596	1	XC-contig_220	0.2	Unknown product	uk
cf-contig_704	1	Unknown product	1	Contig-704	Contig704	30.9	2.9	59.8	83	N	1	P9-1188528_051_G07	83	102	99	GAWESGIXXPGFATELRINFIXLTSGGKKKKKK	2	Ind		1	70	2	62	2	601	1	XC-contig_100	0.87	Unknown product	uk
cf-contig_705	1	Unknown product	1	Contig-705	Contig705	49.1	1.3	70.4	133	N	1	P9-1188529_052_G08	133	152	63	GAWSSXHYGRGTNSTSFEDLD	3	Ind		1	24	3	87	2	78	2	XC-contig_219	0.18	Unknown product	uk
cf-contig_716	1	Unknown product	1	Contig-716	Contig716	38.4	1.4	78.4	55	N	1	P10-1189147_012_C02	55	74	69	GSRKKINGIVINKFXLNRKKKKK	2	Ind		1	95	2	88	2	79	2	XC-contig_97	1.3	Unknown product	uk
cf-contig_733	1	Unknown product	1	Contig-733	Contig733	58.1	.	69.8	120	N	1	P10-1189208_017_H03	120	139	117	AGGDLCKTARTPILRLHIGIYILSKYTVLTKSSNILKKI	2	Ind		1	91	2	84	2	623	1	XC-contig_95	0.41	Unknown product	uk
cf-contig_736	1	Unknown product	1	Contig-736	Contig736	46.8	0.8	80.5	104	N	1	P11-1189223_048_A06	104	123	78	YLIVLFHIXFSKKNQNIKNNRKKKKK	3	Ind		1	596	1	612	1	626	1	XC-contig_27	0.29	Unknown product	uk
cf-contig_741	1	Unknown product	1	Contig-741	Contig741	29.3	.	58.1	43	N	1	P11-1189241_094_B12	43	62	60	GGAMVIRPFTAGYPKKKKKK	1	Ind		1	26	3	617	1	631	1	XC-contig_181	2.1	Unknown product	uk
cf-contig_749	1	Unknown product	1	Contig-749	Contig749	52.2	1.3	71.3	141	N	1	P11-1189268_023_E03	141	160	90	LKEALTNFRQIIYFVLCKIFVINLSKKKKK	3	Ind		1	603	1	623	1	637	1	XC-contig_135	6.7	Unknown product	uk
cf-contig_757	1	Unknown product	1	Contig-757	Contig757	53.9	1	64.4	85	N	1	P11-1189292_019_G03	85	104	72	GREWGXKNNEKEKVRGKDKVRPES	1	Ind		1	609	1	629	1	643	1	XC-contig_206	0.14	Unknown product	uk
cf-contig_765	1	Unknown product	1	Contig-765	Contig765	53.4	.	87.5	53	N	1	P13-1189415_048_A06	53	72	36	PGSIIKKIKIIN	2	Ind		1	614	1	635	1	650	1	XC-contig_173	0.015	Unknown product	uk
cf-contig_774	1	Unknown product	1	Contig-774	Contig774	29.5	3.5	61.9	94	N	1	P13-1189452_057_D07	94	113	78	PGGIGPXYGRGRHKWTSKYINGLYYX	1	Ind		1	621	1	642	1	658	1	XC-contig_209	0.48	Unknown product	uk
cf-contig_776	1	Unknown product	1	Contig-776	Contig776	39.7	1.4	78.4	55	N	1	P13-1189469_088_E12	55	74	69	GQQKKINGIVINKFXLNLKKKKK	2	Ind		1	95	2	88	2	79	2	XC-contig_95	1.7	Unknown product	uk
cf-contig_784	1	Unknown product	1	Contig-784	Contig784	57.	.	80.8	101	N	1	P13-1189486_035_G05	101	120	51	GEYSITSSLKHSIYKKY	2	Ind		1	629	1	650	1	666	1	XC-contig_197	0.15	Unknown product	uk
cf-contig_786	1	Unknown product	1	Contig-786	Contig786	34.3	.	75.3		N	1	P13-1189491_068_G10		85	39	SSFNRSLGHDDVI	2	Ind		1	631	1	652	1	668	1	XC-contig_100	0.004	Unknown product	uk
cf-contig_793	1	Unknown product	1	Contig-793	Contig793	41.5	.	66.7	98	N	1	P12-1189343_044_C06	98	117	78	GPGASGITCRVYKPRTLHFVFLEHKY	1	Ind		1	637	1	658	1	674	1	XC-contig_158	0.11	Unknown product	uk
cf-contig_803	1	Unknown product	1	Contig-803	Contig803	61.7	.	72.7	142	N	1	P12-1189382_069_F09	142	161	57	PGTGGDVAQLIYRRTLDFK	3	Ind		1	646	1	668	1	684	1	XC-contig_156	0.76	Unknown product	uk
cf-contig_444	1	Unknown product	1	Contig-444	Contig444	64.7	.	70.2	686	N	1	P17-1190008_067_G09	686	705	153	LVYIVDIATKQFFQCNDAVLDNCLLIYSSNRKQLVCAFKFEAYLMFANRLL	3	Ind		1	360	1	369	1	374	1	XC-contig_155	1.1	Unknown product	uk				hypothetical protein - Mycoplasma capricolum (fragment)	7.9	gi|629324	35.4	48	80	38	61	32	2	4	450	1	-2	N
cf-contig_269	1	Unknown product	1	Contig-269	Contig269	51.	.	77.4	127	N	1	CAFM_P2-089_D11	127	146	66	KLYGVMDQKKAPRREDYSHLRN	2	Ind		1	61	2	54	2	50	2	XC-contig_33	0.12	Unknown product	uk				Putative membrane protein ycf1 C-terminal part	16	gi|118574743	33.1	21	1535	63	1	8	0	845	39	1	-1	N	4.762
cf-contig_642	1	Unknown product	1	Contig-642	Contig642	60.8	.	75.6	112	N	1	P7-1188982_039_E05	112	131	63	RGMCDGSKKAPRREDYSHLRN	2	Ind		1	61	2	54	2	50	2	XC-contig_33	0.099	Unknown product	uk				Putative membrane protein ycf1 C-terminal part	3.2	gi|118574743	35.4	27	1535	53	2	13	0	845	6	1	-1	N	3.704
cf-contig_299	1	Unknown product	1	Contig-299	Contig299	33.7	.	52.4	227	N	1	CAFL_P1-091_C11	227	246	171	PGEEEDSDSEDSDEDDLEIEYNDRAKVSALKDMTKPIVAPKQQPVEDPADDFDIDAI	3	Ind		1	63	2	56	2	53	2	XC-contig_57	0.016	Unknown product	uk				eukaryotic translation initiation factor 5-like isoform 1	9E-006	gi|328715160	53.9	53	444	54	12	26	2	391	9	1	3	N
cf-contig_355	1	Unknown product	1	Contig-355	Contig355	43.6	.	70.7	121	N	1	P14-1189516_095_A11	121	140	105	GAVGIGHYGRGLSEDFNTIEQNFLKISNNKKVNKN	1	Ind		1	286	1	293	1	293	1	XC-contig_56	0.56	Unknown product	uk				hypothetical protein LOC100570435	27	gi|328724625	32.3	22	462	56	5	10	0	430	28	1	1	N
cf-contig_583	1	Unknown product	1	Contig-583	Contig583	64.1	.	69.7	275	N	1	P4-1188720_051_G07	275	294	135	ILTCLLIVFIYNSTVMFYVYFIISIFCEYTSCIPYTISLCTHLSI	2	Ind		1	475	1	485	1	494	1	XC-contig_135	0.055	Unknown product	uk				tubulin alpha-1C chain-like	1E-004	gi|328709074	50.4	29	450	80	7	6	0	421	6	1	3	N
cf-contig_617	1	Unknown product	1	Contig-617	Contig617	62.3	.	68.2	154	N	1	P6-1188869_092_C12	154	173	102	GRGCRVCLHRRWPRNRATCRIGLMKLTFFLFHYS	1	Ind		1	503	1	515	1	525	1	XC-contig_152	0.048	Unknown product	uk				3-ketoacyl-coa thiolase, mitochondrial (beta- ketothiolase) (acetyl-coa	0.034	gi|157126970	42	19	398	100	5	0	0	379	8	1	2	N
cf-contig_655	1	Unknown product	1	Contig-655	Contig655	63.9	.	68.9	219	N	1	P8-1189032_063_A07	219	238	117	WNHQQHAVFLSGAKIPMDMMNYKSIVYVCTSVLEDCCNF	3	Ind		1	536	1	548	1	560	1	XC-contig_139	0.27	Unknown product	uk				glucosidase ii beta subunit	0.020	gi|157132278	42.7	30	552	51	6	15	0	522	11	1	2	N
cf-contig_313	1	Unknown product	1	Contig-313	Contig313	65.8	.	72.9	247	N	1	CAFL_P1-022_F04	247	266	93	TMIRWGCPQRLEGEKLFKQELVEMLLTDDES	2	Ind		1	253	1	258	1	257	1	XC-contig_57	0.61	Unknown product	uk				glutaredoxin, putative	0.046	gi|157131498	41.6	29	133	53	23	14	0	104	2	1	2	N
cf-contig_389	1	Unknown product	1	Contig-389	Contig389	62.9	.	73.3	258	N	1	P15-1189779_058_D08	258	277	147	MCDLKLQTNNFSNNSITISFGVFNTCEHDCYNIVEYFIACSMNINRTIT	2	Cyt		1	317	1	325	1	326	1	XC-contig_208	0.13	Unknown product	uk				pho85 cyclin	7.2	gi|240278370	34.3	46	589	38	8	29	0	424	62	1	2	N	2.174
cf-contig_708	1	Unknown product	1	Contig-708	Contig708	63.2	.	70.5	713	N	1	P9-1188542_065_H09	713	732	132	LMLIPSHRYHIMKKNTLLSVKRQICGISFDLLQYPKGIVVLLFF	1	Cyt		1	575	1	591	1	604	1	XC-contig_125	0.23	Unknown product	uk				conserved hypothetical protein	6.5	gi|325186547	35.8	25	591	48	4	15	0	236	265	1	-1	N	4
cf-contig_636	1	Unknown product	1	Contig-636	Contig636	61.2	.	74.9	164	N	1	P7-1188937_064_A08	164	183	102	LIDIFKFMETHYFCTYNIVTQVKNLFTNKIFFKF	1	Ind		1	520	1	532	1	542	1	XC-contig_228	0.18	Unknown product	uk				hypothetical protein LOC100636670	48	gi|340380402	31.6	44	1558	37	3	28	1	1156	10	1	-1	N	2.273
cf-contig_338	1	Unknown product	1	Contig-338	Contig338	58.1	.	72.2	384	N	1	P1-1152536_005_F01	384	403	102	KYEIHATYFCFYVIKSDEINNITCLLLYFFLYTF	2	Ind		1	272	1	278	1	277	1	XC-contig_139	0.11	Unknown product	uk				excision endonuclease subunit UvrC	36	gi|227499427	32	24	616	52	4	12	0	152	99	1	-3	N	4.167
cf-contig_403	1	Unknown product	1	Contig-403	Contig403	64.1	.	62.8		N	1	P15-1189827_050_H08		253	114	IRRDCNCALSQAFNSLFCRQLLCYFVIHKIYLMSTGQM	2	Ind		1	329	1	337	1	338	1	XC-contig_69	0.57	Unknown product	uk				probable ATP-dependent RNA helicase DDX60-like	9.6	gi|327278023	33.9	59	1698	33	4	40	0	178	65	1	-1	N	5.085
cf-contig_731	1	Unknown product	1	Contig-731	Contig731	63.4	.	48.7	246	N	1	P10-1189198_035_G05	246	265	207	RPGDFDRQSPTPSEPPPPPRRVGSCGAGSGMVGMGSSGLSSADIPPPLSPMLLDGPYGLDVKYQWRILI	1	Ind		1	592	1	608	1	621	1	XC-contig_227	1.6	Unknown product	uk				suppressor of cytokine signaling 7-like	0.23	gi|327275768	39.3	60	590	41	10	36	8	335	25	1	1	N
cf-contig_309	1	Unknown product	1	Contig-309	Contig309	61.2	.	70.1	128	N	1	CAFL_P1-071_E09	128	147	90	PLLPGRRNRQWKMTVTVIQRIIKNILKVLA	3	Ind		1	250	1	255	1	254	1	XC-contig_163	0.23	Unknown product	uk				ribosomal protein S5 domain 2-like family protein	16	gi|186517317	33.1	28	192	48	15	15	0	163	2	1	-3	N
cf-contig_438	1	Unknown product	1	Contig-438	Contig438	64.8	.	67.9	449	N	1	P17-1189980_039_E05	449	468	141	ILTTSYILNNCKQNVIPKSNSKGGRTSDNFQIARSAFTKTINNKLYL	1	Ind		1	354	1	363	1	368	1	XC-contig_78	0.49	Unknown product	uk				hypothetical protein AOL_s00006g4	2.5	gi|345570908	35.8	50	1215	45	4	29	0	213	229	1	1	N	4
cf-contig_662	1	Unknown product	1	Contig-662	Contig662	61.6	.	87.3	170	N	1	P8-1189066_041_D05	170	189	90	IINIYILFLKNTIYKILFYKILLLNLILIN	3	Ind		1	541	1	553	1	565	1	XC-contig_241	0.2	Unknown product	uk				ubiquitin C-terminal hydrolase CreB	28	gi|302503460	32.3	33	1147	38	3	21	0	15	46	1	-1	N
cf-contig_683	1	Unknown product	1	Contig-683	Contig683	65.2	0.2	73.7	463	N	1	P9-1188460_095_A11	463	482	252	RMFAFAFAFANIRIFFDIRIRIPIRKNRCEYLANVFNKQKGNYYIVAYEMITQLIRFIYFYLIFTYLFFYSTIYFLRIKYDKQI	2	Cyt		1	556	1	571	1	583	1	XC-contig_202	0.029	Unknown product	uk				ADR273Cp	1.4	gi|302307641	36.6	62	589	35	11	41	0	135	178	1	1	N	3.226
cf-contig_11	1	Unknown product	1	Contig-11	Contig11	61.6	.	70.6	178	N	1	P4-1188663_078_B10	178	197	108	PGELKERPNLKQGVVEALISPILIVVKNINTFLICL	2	Ind		1	2	11	1	11	1	11	XC-contig_77	0.21	Unknown product	uk				actin associated protein Wsp1, putative	2.5	gi|121704024	35.8	23	642	66	4	8	0	168	3	1	-1	N
cf-contig_304	1	Unknown product	1	Contig-304	Contig304	53.8	.	79.1	211	N	1	CAFL_P1-089_D11	211	230	69	YFCCKTIIKIYLLFIIARKKKKK	2	Ind		1	245	1	250	1	249	1	XC-contig_44	0.051	Unknown product	uk				multidrug resistance ABC transporter ATP-binding and permease protein	21	gi|85057309	32.7	49	614	38	8	36	1	64	32	1	-2	N	8.163
cf-contig_316	1	Unknown product	1	Contig-316	Contig316	39.1	.	71.6	658	N	1	CAFL_P1-054_F08	658	677	165	QRSSGHYGRVRHPKLANYYLNIEKNKRKKKKQKLRSPPAPPRTKCLKSYLFAPQY	1	Ind		1	255	1	260	1	259	1	XC-contig_193	2e-05	Unknown product	uk				cytochrome oxidase subunit II	0.50	gi|184186874	39.3	50	179	37	28	32	2	23	312	1	-1	N
cf-contig_497	1	Unknown product	1	Contig-497	Contig497	45.9	0.4	79	219	N	1	P20-1190224_079_A09	219	238	87	SLSIVCKTTVFYNVNAFFFLLVCFFFKVV	3	Ind		1	405	1	414	1	419	1	XC-contig_209	0.029	Unknown product	uk				NADH dehydrogenase subunit 3	16	gi|42780825	33.1	26	103	53	26	13	0	40	75	1	3	N	3.846
cf-contig_635	1	Unknown product	1	Contig-635	Contig635	63.	.	75.9	768	N	1	P7-1188931_016_A02	768	787	138	MYIIYCIILEHELQNSTKLYTYMEYINDSKSIMQVLYHWANILLQK	2	Cyt		1	519	1	531	1	541	1	XC-contig_130	0.13	Unknown product	uk				hypothetical protein HMPREF1018_01116	17	gi|336408610	34.7	53	389	31	14	37	0	334	26	1	2	N	1.887
cf-contig_482	1	Unknown product	1	Contig-482	Contig482	22.5	.	62.4	146	N	1	P19-1190184_037_F05	146	165	126	AGESGITAGGLRFVRYFLLICRMGASDCLYLSGSCCVFSIVK	3	Ind		1	392	1	401	1	406	1	XC-contig_223	0.005	Unknown product	uk				hypothetical protein BACUNI_01069	47	gi|160888652	31.6	22	984	52	2	11	0	6	33	1	3	N
cf-contig_42	1	Unknown product	1	Contig-42	Contig42	65.1	.	70.6	393	N	1	P10-1189152_059_C07	393	412	123	REHLKFCVKPHQYGDQVSKMSISPKIIQIFENLFVPIFLDR	3	Ind		1	104	1	96	1	89	1	XC-contig_77	0.41	Unknown product	uk				FtsX family protein	2.5	gi|121601779	35.8	100	324	28	31	77	0	185	50	1	-1	N	4
cf-contig_484	1	Unknown product	1	Contig-484	Contig484	44.6	.	62.3	201	N	1	P19-1190189_070_F10	201	220	213	GLGNFGITAGGTDLHVAIAGKEKREYLDHLGRNTFTQAAITITKYAFNHKKINYSVFTYGIKIMNAKKKKK	3	Ind		1	394	1	403	1	408	1	XC-contig_130	0.47	Unknown product	uk				serine hydroxymethyltransferase	9.3	gi|42523483	33.9	57	415	32	14	40	0	306	15	1	3	N
cf-contig_428	1	Unknown product	1	Contig-428	Contig428	55.3	0.9	72.4	195	N	1	P17-1189942_029_B03	195	214	96	PGESGIXXPGDWVNWIRQIIYFKSIKTCVFLI	1	Ind		1	9	4	15	3	360	1	XC-contig_174	0.05	Unknown product	uk				hypothetical protein BGP_2860	27	gi|153873726	32.3	39	42	40	95	24	1	1	4	1	-2	N	2.564
cf-contig_281	1	Unknown product	1	Contig-281	Contig281	22.2	.	65.3	304	N	1	CAFM_P2-033_H05	304	323	318	KKMSPPPPGKQGFPPKRALSAGGEKKFNFPPPPLKNFPPPFFKKKKKTLFPKKGGLFSFFFFFSLFFRGFFFKTGKIFFGPKFFLIFFFFSPKNFFFFFSQKKKKK	3	Cyt		1	225	1	230	1	229	1	XC-contig_37	0.045	Unknown product	uk				integral membrane protein	0.027	gi|229820238	42.4	62	452	50	14	19	2	167	15	2	3	N
cf-contig_456	1	Unknown product	1	Contig-456	Contig456	62.5	.	72.5	418	N	1	P18-1190063_026_D04	418	437	117	RRLKKPLCRKMMKTYKLLCYRQHECFVYFVNENGGFEFE	2	Ind		1	370	1	379	1	384	1	XC-contig_205	2e-09	Unknown product	uk				GTP-binding nuclear protein Ran-like	1.9	gi|350412636	36.2	16	218	94	8	1	0	202	7	1	1	N
cf-contig_342	1	Unknown product	1	Contig-342	Contig342	34.6	.	63.6	574	N	1	P1-1152551_020_G04	574	593	255	GLAQFGITAGRPRGRGQGRGFANRGERAGGKAPFRGDGAVQGAEERPEVHLGRGRQNAPKVDDEHGFSIFGLRYIYIYNIRRCDI	2	Ind		1	275	1	281	1	280	1	XC-contig_230	0.25	Unknown product	uk				hypothetical protein LOC100745853 isoform 2	4E-005	gi|350407822	52.4	56	425	50	13	32	3	369	29	1	2	N
cf-contig_709	1	Unknown product	1	Contig-709	Contig709	64.5	.	69.6	244	N	1	P10-1189122_015_A01	244	263	159	PGTSAKFNPACSEQCRRNYKLCSRSSASGVNSSIVFVLLIPVIRIILDSQLIS	1	Ind		1	576	1	592	1	605	1	XC-contig_61	0.32	Unknown product	uk				UDP-glucuronosyltransferase 2B30-like	47	gi|340721181	31.6	18	500	57	4	8	0	186	29	1	-2	N
cf-contig_432	1	Unknown product	1	Contig-432	Contig432	61.4	.	73.1	245	N	1	P17-1189958_059_C07	245	264	108	VGMEKVLGAKIADKAKDAVKKAAGAVSDFADNFAGA	3	Ind		1	76	2	68	2	63	2	XC-contig_99	0.12	Unknown product	uk				MlpL-like protein, lipoprotein	4.3	gi|203288779	35	35	144	33	25	24	0	1	52	1	-1	N
cf-contig_477	1	Unknown product	1	Contig-477	Contig477	61.	.	78	344	N	1	P19-1190158_025_D03	344	363	132	SITDETNGLVYIFIKSCKFNLFMLMISNNLFDVLINYFFILTIY	1	Ind		1	388	1	397	1	402	1	XC-contig_219	0.49	Unknown product	uk				hypothetical membrane associated protein	2.5	gi|119953030	35.8	43	273	22	16	37	0	11	187	1	1	N	4.651
cf-contig_30	2	Unknown product	2	Contig-30	Contig30	69.6	.	75.8		N	2	P10-1189191_070_F10	270	281	87	IAETSRTVTKCSRNIKCFQIDYYKYCNIV	1	Ind		2	1	14	2	9	2	7	XC-contig_235	0.002	Unknown product	uk				hypothetical protein Bint_2718	1.4	gi|343387822	36.6	37	854	41	4	23	0	124	161	1	-2	N	2.703
cf-contig_337	1	Unknown product	1	Contig-337	Contig337	60.5	.	76.8	274	N	1	P1-1152533_072_E10	274	293	195	GEGKTKELFSNFQKQMSVLMQSVNEKFSKIKERAQKYFKDAETKLKELLSRFSSQLRKTSEGSHQ	1	Cyt		1	22	3	19	3	18	3	XC-contig_165	0.14	Unknown product	uk				DNA-directed RNA polymerase omega subunit family protein-like protein	3.3	gi|300871846	35.4	54	5567	25	1	41	0	2322	4	1	1	N
cf-contig_199	3	Unknown product	3	Contig-199	Contig199	83.9	.	74.6	245	N	3	P10-1189193_086_F12	255	264	153	KKLLKLLRILLKILQAHKKCFLFNICDFNSNILIHIYTHIVYQKINVINNC	1	Ind		3	168	1	170	1	168	1	XC-contig_26	0.065	Unknown product	uk				exodeoxyribonuclease V 67 kDa polypeptide	0.86	gi|345539366	37.4	70	602	38	12	44	2	326	37	1	1	N	2.857
cf-contig_379	1	Unknown product	1	Contig-379	Contig379	59.1	.	72.4	195	N	1	P15-1189747_096_A12	195	214	114	QFIFTHGHSFGNSKNNLICVWCIDFFLFIKGFCEVQKW	1	Ind		1	308	1	315	1	316	1	XC-contig_26	0.12	Unknown product	uk				hypothetical protein CAEBREN_24742	9.3	gi|341886090	33.9	43	250	37	18	28	0	7	37	1	-2	N	4.651
cf-contig_612	1	Unknown product	1	Contig-612	Contig612	64.7	.	77.2	327	N	1	P6-1188835_016_A02	327	346	153	SKKIKIGFCFIFDIFFICFTSMTFNLDVISVLNYSIYYMNLLENNAIINNS	1	Ind		1	498	1	510	1	520	1	XC-contig_141	0.12	Unknown product	uk				CBR-SRV-34 protein	2.5	gi|309355120	35.8	45	622	39	7	28	0	538	172	1	1	N
cf-contig_84	2	Unknown product	2	Contig-84	Contig84	76.1	.	63.7		N	2	P3-1188570_011_C01	170	267	225	AGQPETVEIIITNQETMVVIIPMDLVMELMEDLQDLHPKLTLRNKEILAHNFANTTNAYTKVFLPTCDKLCIVKA	1	Cyt		2	35	2	28	2	26	2	XC-contig_16	0.45	Unknown product	uk				hypothetical protein W03G1.5	0.078	gi|17542802	40.8	78	471	53	17	14	0	274	15	2	3	N
cf-contig_329	1	Unknown product	1	Contig-329	Contig329	44.3	.	64.8	140	N	1	P1-1152495_062_B08	140	159	111	GRGIGPLRPGVLRNIRQLQNMLIKFLNENFTFAWQVT	2	Ind		1	266	1	272	1	271	1	XC-contig_240	0.15	Unknown product	uk				hypothetical protein CRE_07291	81	gi|308495071	30.8	35	338	36	11	23	0	257	32	1	-3	N
cf-contig_797	1	Unknown product	1	Contig-797	Contig797	54.6	.	68.2	135	N	1	P12-1189356_057_D07	135	154	114	GLTGRARNKVSTAVLFGILTFLYDGVCFMFRLQYFCNK	2	Ind		1	640	1	662	1	678	1	XC-contig_127	0.072	Unknown product	uk				hypothetical protein CRE_15427	47	gi|308488167	31.6	33	795	38	4	21	0	369	5	1	2	N
cf-contig_292	1	Unknown product	1	Contig-292	Contig292	58.7	.	56.6	133	N	1	CAFL_P1-093_B11	133	152	93	ERRSNFIWSLIVIDDRSPKALVDFGHGCDAF	3	Ind		1	234	1	239	1	238	1	XC-contig_187	0.64	Unknown product	uk				threonine synthase	21	gi|312134575	32.7	30	496	41	6	18	0	362	24	1	-1	N
cf-contig_373	1	Unknown product	1	Contig-373	Contig373	65.1	.	77	451	N	1	P14-1189589_084_G12	451	470	123	CLLMLIYTPALFIIYRYLYKQHLLYIMKVIIYCKVIFYIKL	1	Ind		1	302	1	309	1	310	1	XC-contig_91	0.026	Unknown product	uk				hypothetical protein LOC100406103	0.17	gi|296204977	39.7	114	298	25	39	86	6	59	24	1	-1	N	4.386
cf-contig_138	6	Unknown product	6	Contig-138	Contig138	82.6	.	74.5	283	N	6	P4-1188715_004_G02	284	302	192	ALDKLISEVFIKNFNKKKKQINTKLLKINTCTGKILLNLDLLKQFKNSVNCKKIIQKKMSSINK	2	Ind		6	136	1	133	1	130	1	XC-contig_150	0.078	Unknown product	uk				Hormone-sensitive lipase	0.17	gi|307166234	39.7	48	403	26	12	38	0	341	123	1	-1	N	4.167
cf-contig_777	1	Unknown product	1	Contig-777	Contig777	54.2	0.6	51.3	139	N	1	P13-1189471_006_F02	139	158	129	RGRDSESFVNDLGTWRGVVLGRAVTTLRSVETQPLAWGFVMLA	2	Ind		1	623	1	644	1	660	1	XC-contig_181	0.51	Unknown product	uk				hypothetical protein EAG_03722	0.035	gi|307183242	42	32	134	66	25	11	1	16	29	1	2	N
cf-contig_470	1	Unknown product	1	Contig-470	Contig470	61.7	.	67.1	471	N	1	P19-1190122_031_A03	471	490	279	ICRLRLAHTKNNVHLFRIGIKQDPFCSCSTVLDTIDHILWICPLYERQRIFLFEKLQQRNVSFPINARFIISSNNIDLYRILIDFVNESNIRL	1	Ind		1	382	1	391	1	396	1	XC-contig_163	0.52	Unknown product	uk				hypothetical protein EAG_08495	8E-005	gi|307189101	50.8	57	246	36	24	37	0	189	40	1	1	N
cf-contig_634	1	Unknown product	1	Contig-634	Contig634	57.3	.	77.4	189	N	1	P6-1188927_066_H10	189	208	129	YDFFLYDDAYRKNFRDEDFILLIFNLFIVIIDLFILEFEMFVF	1	Ind		1	518	1	530	1	540	1	XC-contig_168	0.064	Unknown product	uk				hypothetical protein CSU_0222	1.4	gi|315932501	36.6	41	47	44	89	26	2	2	31	1	1	N	2.439
cf-contig_266	1	Unknown product	1	Contig-266	Contig266	60.2	.	85.3	151	N	1	CAFM_P2-009_D01	151	170	96	KCENLRFNSLIGVKFNLFIIKCTKIIKFSEFN	1	Ind		1	213	1	217	1	215	1	XC-contig_196	0.033	Unknown product	uk				lysophospholipase 2 precursor	27	gi|255727342	32.3	38	602	33	6	26	0	319	27	1	-1	N
cf-contig_773	1	Unknown product	1	Contig-773	Contig773	64.5	.	77.4	242	N	1	P13-1189449_026_D04	242	261	111	PIIEFLFLLYCLKNCYLNKVYCLHLYEGNICNISINQ	2	Ind		1	620	1	641	1	657	1	XC-contig_167	0.064	Unknown product	uk				transglutaminase domain-containing protein	5.6	gi|345506190	34.7	45	386	39	12	28	1	70	84	1	-2	N	2.222
cf-contig_498	1	Unknown product	1	Contig-498	Contig498	63.9	.	73.9	410	N	1	P20-1190227_096_A12	410	429	153	KYQKDMADKNIVVSDCKTCNYNFCNMSSLTNPSVSALISLAMISICFQILF	3	Cyt		1	406	1	415	1	420	1	XC-contig_202	0.047	Unknown product	uk				hypothetical protein RATSFB_0294	1.9	gi|347542146	36.2	70	786	27	9	56	0	124	169	1	-1	N	7.143
cf-contig_492	1	Unknown product	1	Contig-492	Contig492	61.5	.	70	254	N	1	P19-1190201_068_G10	254	273	123	AVISSLQDACLSCLHDFYLLNWHSSVFVECEILNEFLVSSF	1	Ind		1	400	1	409	1	414	1	XC-contig_156	0.64	Unknown product	uk				exonuclease V, gamma chain	5.5	gi|71892048	34.7	51	1133	34	5	34	0	307	47	1	-3	N	1.961
cf-contig_605	1	Unknown product	1	Contig-605	Contig605	58.5	.	78.8	151	N	1	P5-1188789_024_E04	151	170	87	LIKRNYILYFNNKIFKVKKKKKRKKKKKK	1	Ind		1	492	1	504	1	514	1	XC-contig_119	0.12	Unknown product	uk				valyl-tRNA synthetase	21	gi|13186353	32.7	37	284	46	13	21	0	238	16	1	1	N	2.703
cf-contig_565	1	Unknown product	1	Contig-565	Contig565	39.9	.	75.8	825	N	1	P3-1188638_065_H09	825	844	177	EPKLSENCFLSICNHLSPLKQRNSKVSILGTTLICILFLLQGAFKDIPLFYKILSLRIK	2	Ind		1	461	1	471	1	478	1	XC-contig_53	0.075	Unknown product	uk				selenocysteine lyase	1.3	gi|116334937	38.5	71	384	29	19	51	4	4	613	1	1	N	5.634
cf-contig_681	1	Unknown product	1	Contig-681	Contig681	62.7	.	73.4	534	N	1	P9-1188455_048_A06	534	553	111	DKYEQNCRIMIFIYIYLNKIQMLESLELYGPKKKKKK	1	Ind		1	555	1	569	1	581	1	XC-contig_190	0.17	Unknown product	uk				unknown membrane protein	0.65	gi|91762323	38.1	92	562	29	17	71	0	156	6	1	-3	N	5.435
cf-contig_532	1	Unknown product	1	Contig-532	Contig532	58.6	.	65.5	216	N	1	P2-1190458_019_G03	216	235	132	GAGVFGITAGVTRSFAIFYVPRCPQVVSDIRVALFKTRNLETIY	1	Ind		1	435	1	445	1	450	1	XC-contig_53	0.04	Unknown product	uk				phospho-2-dehydro-3-deoxyheptonate aldolase	36	gi|347604042	32	27	351	42	8	16	0	270	16	1	-2	N
cf-contig_788	1	Unknown product	1	Contig-788	Contig788	51.5	.	82.5	609	N	1	P12-1189330_045_B05	609	628	141	NICVFIFIKICLTNKLKKFGQTIFGQNFDYYDNLEILFSNYNSLISK	1	Ind		1	633	1	654	1	670	1	XC-contig_1	0.054	Unknown product	uk				putative pseudouridine synthase, RluA family	4.7	gi|307069601	35.8	122	242	29	51	109	16	23	190	1	-2	N	8.197
cf-contig_747	1	Unknown product - Membrane anchor detected	1	Contig-747	Contig747	56.9	0.1	76	889	N	1	P11-1189259_042_D06	889	908	177	NXGFEIFFTLYSCCHDNFLFKIFLIQRKFFTTYSEVFAEFSVEFRNLMTHIWYRNVENK	1	Anch		1	602	1	621	1	635	1	XC-contig_194	0.15	Unknown product - Membrane anchor detected	uk membrAnchor				hypothetical protein ZICARI_152	0.18	gi|307069629	41.6	115	261	28	44	85	6	141	520	1	-3	N	3.478
cf-contig_568	1	Unknown product	1	Contig-568	Contig568	45.5	1.6	66.9	108	N	1	P4-1188646_047_A05	108	127	120	GVGNXXITAGGQSAVTSLYNRIICIIYYNKRFYLSKKKKK	3	Ind		1	86	2	80	2	72	2	XC-contig_213	0.23	Unknown product	uk				apolipoprotein L domain-containing protein 1	47	gi|73997625	31.6	33	245	32	14	23	0	143	3	1	3	N
cf-contig_542	1	Unknown product	1	Contig-542	Contig542	60.6	.	63	73	N	1	P3-1188554_079_A09	73	92	57	RASPSACVSASLCVSLMNK	3	Ind		1	444	1	454	1	460	1	XC-contig_16	0.069	Unknown product	uk				prostaglandin E2 receptor EP3A subtype	2.5	gi|37790758	35.8	17	416	94	4	1	0	399	6	1	3	N
cf-contig_131	4	Unknown product	4	Contig-131	Contig131	88.7	.	66.7	407	N	4	P14-1189546_041_D05	407	426	336	AGVGHKYGKCYSNVCLCKQQKGTWKRLKSKYVDYDKIKETITQGQQEEQEEQGVCTVRFYGRVKIHCLQNITQTLQDNFCRDDCMKLNRPGGKCDQANQRCACNYHSDFFVN	1	Ind		4	19	3	35	2	33	2	XC-contig_156	0.089	Unknown product	uk				hypothetical protein CATMIT_01386	0.027	gi|224542211	42.4	116	296	32	40	80	3	160	55	1	-1	N
cf-contig_474	1	Unknown product	1	Contig-474	Contig474	38.4	.	76.4	282	N	1	P19-1190136_045_B05	282	301	102	INLIHYFSVHEKLLLFFSGQIDKKCVLITVSLFP	3	Ind		1	385	1	394	1	399	1	XC-contig_234	0.041	Unknown product	uk				olfactory receptor 6C2-like	5.6	gi|348581012	34.7	48	311	40	16	33	3	204	6	1	-3	N	4.167
cf-contig_641	1	Unknown product	1	Contig-641	Contig641	62.8	0.4	67.7	455	N	1	P7-1188974_073_D09	455	474	174	GRGIXALRPGGCLTQDSVRIQLVELCLILELEVEPSRESGLEGKDNVYRSKLVCCIVY	3	Ind		1	525	1	537	1	547	1	XC-contig_144	1.8	Unknown product	uk				predicted protein	0.10	gi|159468536	40.4	30	1063	58	3	13	0	1030	44	1	2	N
cf-contig_485	1	Unknown product	1	Contig-485	Contig485	39.4	.	48.2	122	N	1	P19-1190191_086_F12	122	141	135	RGNRAITAGPGPTTTGYPPFYPLTNFSAEWWIPVVVWARGKKKKK	3	Ind		1	395	1	404	1	409	1	XC-contig_111	0.061	Unknown product	uk				hypothetical protein CHLNCDRAFT_143475	16	gi|307108903	33.1	21	669	59	3	9	0	59	1	1	1	N
cf-contig_45	27	Unknown product	27	Contig-45	Contig45	87.9	.	66.9	422	N	27	P2-1190399_030_B04	420	453	270	AGGKYLCVGVLLLMAIILQVQSMALDPNEENTDGNAAGRAKRYLKYHDSKRRCEDIWDCEGKCPDNFPNPVCFPRDNRRTCLCYEAHVKG	1	Cyt		27	28	2	23	2	22	2	XC-contig_144	0.13	Unknown product	uk				similar to predicted protein	4.2	gi|198428634	35	65	605	26	11	52	3	407	61	1	1	N
cf-contig_46	1	Unknown product	1	Contig-46	Contig46	65.7	.	66	416	N	1	P8-1189093_054_F08	416	435	264	PGYLCVGVLLLMAIILQVQSMALDPNEENTDGNAAGRAKRYLKYHDSKRRCEDIWDCEGKCPDNFPNPVCFPRDNRRTCLCYEAHVKG	1	Cyt		1	28	2	23	2	22	2	XC-contig_144	0.12	Unknown product	uk				similar to predicted protein	4.2	gi|198428634	35	65	605	26	11	52	3	407	55	1	1	N
cf-contig_384	1	Unknown product	1	Contig-384	Contig384	57.3	.	75.4	383	N	1	P15-1189760_011_C01	383	402	129	NRNVSNFISKFVIGYFSNNFQILILLLNILTLFTSKKNVKKKL	1	Ind		1	312	1	320	1	321	1	XC-contig_25	0.06	Unknown product	uk				hypothetical protein CdifQCD-2_01062	1.5	gi|255654290	36.6	28	277	55	10	13	0	222	117	1	3	N	7.143
cf-contig_400	1	Unknown product	1	Contig-400	Contig400	54.7	1	71.4	177	N	1	P15-1189816_067_G09	177	196	138	GGLGIXALRPGRLKSFTSKIIFSLSTKLILFMLNIKTFDKFVNSFL	1	Ind		1	326	1	334	1	335	1	XC-contig_107	0.11	Unknown product	uk				hypothetical protein CKR_2981	12	gi|219856324	33.5	56	305	33	19	38	1	10	6	1	-3	N
cf-contig_717	1	Unknown product	1	Contig-717	Contig717	63.8	.	75.5	307	N	1	P10-1189148_027_C03	307	326	129	YLIIKHISNNKIFTTILKQSKLLGSYRKIYTLCYIFQFLNDVY	1	Ind		1	581	1	597	1	610	1	XC-contig_190	0.003	Unknown product	uk				hypothetical protein Closa_3702	16	gi|302388023	33.1	45	101	33	46	32	2	3	60	1	-1	N	2.222
cf-contig_149	1	Unknown product	1	Contig-149	Contig149	47.1	1	64.7	83	N	1	CAFM_P2-068_G10	83	102	96	WVSTQKWPLRXGNDTRKQFLIPHNTPIKKKKK	3	Ind		1	140	1	137	1	134	1	XC-contig_193	0.003	Unknown product	uk				hypothetical protein COLSTE_00035	46	gi|210629855	31.6	20	53	52	40	10	0	25	14	1	-3	N
cf-contig_528	1	Unknown product	1	Contig-528	Contig528	38.3	.	66.4	88	N	1	P2-1190435_024_E04	88	107	105	GGHGKSAIYGRVYNIWVLQWYKRKLNIALKKKKKK	1	Ind		1	26	3	441	1	446	1	XC-contig_183	1.1	Unknown product	uk				lysine exporter protein LysE/YggA	63	gi|334564538	31.2	20	180	42	12	12	0	119	14	1	-2	N
cf-contig_247	2	Unknown product	2	Contig-247	Contig247	82.4	.	75.2	130	N	2	P12-1189387_004_G02	156	149	126	PGVQASHSSFNKFVQMYMAYSFNYEIVHILYYKNSIKTLTYF	3	Ind		2	195	1	198	1	196	1	XC-contig_220	0.014	Unknown product	uk				Alkaline ceramidase 2	82	gi|344242245	30.8	28	275	34	11	19	0	199	10	1	1	N
cf-contig_112	2	Unknown product	2	Contig-112	Contig112	88.9	.	72.6	149	N	2	P18-1190113_034_H06	163	168	120	RRAALKKAKAAKPKKAKTAAKPVKKIKNKMSPAKLMDFIL	3	Ind		2	125	1	120	1	117	1	XC-contig_188	0.032	Unknown product	uk				hypothetical protein I79_008707	3.2	gi|344238185	35.4	28	212	65	14	10	0	175	18	1	3	N
cf-contig_678	1	Unknown product	1	Contig-678	Contig678	61.3	.	73.8	233	N	1	P9-1188450_015_A01	233	252	144	SEEERKKKKRDITNKKQKKRKKKRRHKRKIKKRKKKRKLKEERKKKKK	3	Ind		1	4	6	566	1	578	1	XC-contig_206	2e-08	Unknown product	uk				hypothetical protein I79_019834	1E-011	gi|344255351	73.2	129	140	51	93	36	0	0	0	47	2	Y	1.55
cf-contig_590	1	Unknown product	1	Contig-590	Contig590	51.4	.	78.9	90	N	1	P5-1188755_046_B06	90	109	87	GGKKRYHWVLLFCKTCLYINKKIRSKKKK	2	Ind		1	27	3	79	2	71	2	XC-contig_182	0.0001	Unknown product	uk				Thyrotropin-releasing hormone receptor	48	gi|344237983	31.6	15	476	68	3	5	0	382	23	1	2	N
cf-contig_302	1	Unknown product	1	Contig-302	Contig302	64.7	.	78.7	356	N	1	CAFL_P1-073_D09	356	375	150	HQTRITQKLSQRIIYFIQSSSEKIIYLIKICLYTNIFCLCEKILIDQSEF	3	Ind		1	243	1	248	1	247	1	XC-contig_165	1e-05	Unknown product	uk				hypothetical protein CPARA_3gp384	1.1	gi|330040514	37	86	302	30	29	61	8	139	28	1	-1	N	2.326
cf-contig_804	1	Unknown product	1	Contig-804	Contig804	55.5	.	77.8	125	N	1	P12-1189388_019_G03	125	144	60	DGQEGRNDMEPIPTSFEDLD	3	Ind		1	24	3	87	2	78	2	XC-contig_43	0.084	Unknown product	uk				hypothetical protein	37	gi|209876700	32	34	1964	34	2	23	0	1217	1	1	-1	N
cf-contig_604	1	Unknown product	1	Contig-604	Contig604	30.1	.	74.2		N	1	P5-1188786_007_E01		388	111	KYTYLSKKKTNKKKKKRRRGPLTKVKDAGSMFDTHIF	2	Ind		1	491	1	503	1	513	1	XC-contig_151	1	Unknown product	uk				hypothetical predicted multi-pass transmembrane protein, unknown function	16	gi|32399026	33.1	58	1001	40	6	35	4	867	176	1	2	N	5.172
cf-contig_608	1	Unknown product	1	Contig-608	Contig608	57.1	0.7	70.9	256	N	1	P5-1188821_084_G12	256	275	99	GGHGIXALRPGNKERLRYKLLQAIQQTEGFSLV	2	Ind		1	494	1	506	1	516	1	XC-contig_95	0.88	Unknown product	uk				hect E3 ubiquitin ligase	0.035	gi|170060307	42	24	1063	80	2	5	0	1039	26	1	2	N
cf-contig_27	2	Unknown product	2	Contig-27	Contig27	80.7	.	74.4	180	N	2	P17-1189967_026_D04	196	199	114	GVWHCALRQIAGTFRIVTKCSRNTECFQIDYYKYCNIV	1	Ind		2	1	14	2	9	2	7	XC-contig_77	0.55	Unknown product	uk				kek1	9.5	gi|170029919	33.9	44	832	31	5	31	0	133	23	1	-1	N
cf-contig_551	1	Unknown product	1	Contig-551	Contig551	59.2	.	72.6	346	N	1	P3-1188600_055_E07	346	365	189	YCDDLFNIITIYSYYIYICTSCDDYSCFDIKIIYLKNEKIFHCTGLLWHIKICIKNIFDIINK	1	Ind		1	450	1	460	1	466	1	XC-contig_174	0.045	Unknown product	uk				rabenosyn-5	0.004	gi|170035065	45.1	28	514	72	6	8	0	474	33	1	3	N
cf-contig_92	8	Unknown product	8	Contig-92	Contig92	90.3	.	76.3	293	N	8	P3-1188585_026_D04	315	312	141	TAGGYCRFDAKSERCWKTYKWWCWSKQLWINLFIIKKIIYFTFFNTN	2	Ind		8	37	2	30	2	28	2	XC-contig_57	0.003	Unknown product	uk				hypothetical protein	2.5	gi|321268762	35.8	51	344	36	15	33	6	149	153	1	-2	N	3.922
cf-contig_611	1	Unknown product	1	Contig-611	Contig611	59.6	.	72.3	360	N	1	P5-1188830_065_H09	360	379	132	SSFFNINSQKSPFFLGGYTSCAPNSCIRNINININIIHISLPFP	1	Ind		1	497	1	509	1	519	1	XC-contig_190	0.11	Unknown product	uk				ABC-type phosphate/phosphonate transport system periplasmic component-like	2.5	gi|256818718	35.8	40	286	39	14	25	0	39	172	1	-2	N	2.5
cf-contig_582	1	Unknown product	1	Contig-582	Contig582	60.9	.	74.9	176	N	1	P4-1188718_035_G05	176	195	57	IVDERYLDQEREFQMTDNW	3	Ind		1	474	1	484	1	493	1	XC-contig_43	0.19	Unknown product	uk				odorant receptor, family E, subfamily 124, member 2	9.5	gi|190358552	33.9	49	310	36	16	32	9	244	3	1	-2	N
cf-contig_250	1	Unknown product	1	Contig-250	Contig250	64.8	.	71.2	353	N	1	CAFM_P2-048_A06	353	372	129	HAKMVCSLYGGSDGMQGFLRCKLCNYILFVLIVIYVVRKMSIF	3	Ind		1	198	1	201	1	199	1	XC-contig_55	0.95	Unknown product	uk				DEHA2E21802p	21	gi|294657941	32.7	47	1550	35	3	31	1	1289	146	1	-3	N
cf-contig_572	1	Unknown product	1	Contig-572	Contig572	59.6	.	63.1	708	N	1	P4-1188668_027_C03	708	727	294	LLQRISNNIFGSGMHLPQCVSLRVTSRIMDLRLTITLCVRFRIHCACQQPFTSTAPFFLLPSWSSSPSAGLDPPHLVPASRAISPSMRSLKPLGYLSY	2	Cyt		1	466	1	476	1	484	1	XC-contig_124	0.029	Unknown product	uk				IleS	6.4	gi|224369583	35.8	90	936	31	10	62	18	315	388	1	-2	N	1.111
cf-contig_447	1	Unknown product	1	Contig-447	Contig447	60.9	0.2	77.2	572	N	1	P18-1190031_064_A08	572	591	159	ELIYVNHSHFSLICIFFKSYSILLIRLPFSLTSTVLITYNKYLYNMFARIKLL	1	Ind		1	362	1	371	1	376	1	XC-contig_51	0.069	Unknown product	uk				acetyltransferase family protein	2.3	gi|345860753	36.6	50	288	40	18	31	4	3	180	1	-2	N
cf-contig_652	1	Unknown product	1	Contig-652	Contig652	63.1	0.3	76.1	303	N	1	P7-1189015_002_H02	303	322	126	LFLHILHFTRQTQGFGNEFANFNCIILKEVVTNYSNKTCNSD	2	Ind		1	533	1	545	1	557	1	XC-contig_157	0.21	Unknown product	uk				O-antigen polymerase	16	gi|288572892	33.1	52	585	35	9	34	0	190	86	1	2	N	3.846
cf-contig_435	1	Unknown product	1	Contig-435	Contig435	55.8	.	79.7	114	N	1	P17-1189962_091_C11	114	133	87	KIATYHQEVIFSLAISENKNNYINTNNIN	3	Ind		1	352	1	361	1	365	1	XC-contig_190	0.099	Unknown product	uk				CoA-transferase family III protein	21	gi|66826035	32.7	25	471	46	6	14	0	361	27	1	3	N	4
cf-contig_515	1	Unknown product	1	Contig-515	Contig515	59.5	.	73.4	312	N	1	P2-1190391_064_A08	312	331	114	GLGNRALRPGNYLQYFLCMYGVCHNADCNYLTVKFCTS	3	Ind		1	420	1	429	1	434	1	XC-contig_49	0.088	Unknown product	uk				hypothetical protein DDB_G0279341	7.2	gi|66815571	34.3	56	424	37	13	36	1	49	125	1	-1	N	1.786
cf-contig_790	1	Unknown product	1	Contig-790	Contig790	25.7	.	70.6	409	N	1	P12-1189340_027_C03	409	428	228	RIIIRRHFLTIYFFIHNNIKYMTAPKKKTNKNNNSNRLISHRDFNNRYFNNNNNLYDFIKFNHPEWKGLNFMLMQF	2	Cyt		1	635	1	656	1	672	1	XC-contig_129	0.17	Unknown product	uk				hypothetical protein DDB_G0280879	0.027	gi|66813562	42.4	150	564	37	27	35	0	332	107	2	2	N
cf-contig_398	1	Unknown product	1	Contig-398	Contig398	61.9	.	67.4	420	N	1	P15-1189810_019_G03	420	439	327	GAGDSAITAGWPKNKENNGSQQEQEKQRMLETNEIPQNSNSGTTTSTTTPSSEDEKSSSSNVHENETFKNSSGAYMITYRPVTLLVRIKLFFQELWLRIVIFIRQIIRF	2	Cyt		1	73	2	65	2	60	2	XC-contig_149	9e-05	Unknown product	uk				myb domain-containing protein	0.045	gi|66821335	41.6	54	734	34	7	36	0	136	38	1	2	N
cf-contig_415	1	Unknown product	1	Contig-415	Contig415	65.1	.	78.9	332	N	1	P16-1189877_074_D10	332	351	156	YFKAQVPINDILKMFVRFVGILYKICDNVLDIKLKVTQMYVAIYMYLLYLCK	3	Ind		1	339	1	347	1	350	1	XC-contig_49	0.035	Unknown product	uk				hypothetical protein DFA_07651	12	gi|328868295	33.5	69	482	30	15	49	0	124	102	1	-2	N	7.246
cf-contig_126	5	Unknown product	5	Contig-126	Contig126	83.7	.	70.8	567	N	5	P16-1189891_088_E12	470	586	327	RPGSTSGLFQCHITCYKQGNGACRNECQCTWENKILDPNSNTINNQVPGSTKHENNIKNKENKKKPKPTKPVPKPKPISGTNVVELIFSDEDRLPDPEYNSAESKEKKK	3	Ind		5	42	2	34	2	32	2	XC-contig_44	0.038	Unknown product	uk				hypothetical protein DICPUDRAFT_80227	0.031	gi|330802911	42.7	87	1317	31	7	62	0	756	114	1	3	N	1.149
cf-contig_633	1	Unknown product	1	Contig-633	Contig633	65.6	.	71.4	443	N	1	P6-1188926_065_H09	443	462	114	GRGGDRDTPVWLVTRKIIAELLPKPATLSFKHKFILIS	1	Ind		1	517	1	529	1	539	1	XC-contig_4	0.052	Unknown product	uk				cathepsin L-like cysteine proteinase	1E-005	gi|253796148	53.1	26	376	81	7	5	0	350	9	1	3	N
cf-contig_711	1	Unknown product	1	Contig-711	Contig711	64.3	.	65.5	248	N	1	P10-1189134_013_B01	248	267	78	NMSLKMFDKGYRLPDRYLISSYCLMD	1	Ind		1	578	1	594	1	607	1	XC-contig_229	0.32	Unknown product	uk				hypothetical protein DORFOR_00468	12	gi|166030794	33.5	34	517	40	7	22	0	1	70	1	1	N	2.941
cf-contig_127	1	Unknown product	1	Contig-127	Contig127	64.6	.	71.3	458	N	1	P3-1188637_050_H08	458	477	249	GRVHMGEKILDPNSNTINNQVPGSTKHENNIKNKENKKKPKPTVPVPKPKPISGTNVVELIFSDEDRLPDPEYNSAESRERKK	2	Cyt		1	42	2	34	2	32	2	XC-contig_209	0.006	Unknown product	uk				GH11011	0.13	gi|195030592	40	59	719	33	8	40	7	430	38	1	2	N
cf-contig_461	1	Unknown product	1	Contig-461	Contig461	56.1	.	69.5	279	N	1	P18-1190081_072_E10	279	298	129	GRAMVGRRCYQGSPVRLQNQAAENGSKVILNLESSPTALVVKL	2	Ind		1	374	1	383	1	388	1	XC-contig_138	1.3	Unknown product	uk				GH22664	0.060	gi|195054854	41.2	22	154	82	15	4	0	132	15	1	3	N
cf-contig_159	1	Unknown product	1	Contig-159	Contig159	58.2	.	70.1	215	N	1	P10-1189169_090_D12	215	234	111	FLFNKILLYVSFSLNTKMTEIVIRQNKKLNYKKKKKK	2	Ind		1	21	3	145	1	142	1	XC-contig_57	0.015	Unknown product	uk				GH24489	12	gi|195045272	33.5	38	3505	33	1	26	0	979	1	1	-1	N	2.632
cf-contig_740	1	Unknown product	1	Contig-740	Contig740	20.4	.	59.3	158	N	1	P11-1189240_093_B11	158	177	126	GAWESALRPGVSQAKYFSKSAEDKIKSSGWCLRAPRSPIYKI	2	Ind		1	599	1	616	1	630	1	XC-contig_82	0.0001	Unknown product	uk				ribosomal protein L27A, isoform B	5.5	gi|320544519	34.7	21	111	68	20	7	0	83	23	1	2	N
cf-contig_175	1	Unknown product	1	Contig-175	Contig175	64.4	.	70.7	357	N	1	P16-1189900_069_F09	357	376	84	YIYDECIRNIYVRIVLNMMKNKMNNVCG	3	Ind		1	154	1	156	1	154	1	XC-contig_203	0.0003	Unknown product	uk				GI19857	0.001	gi|195118995	47	230	325	24	71	64	0	0	0	54	-2	Y	0.435
cf-contig_627	1	Unknown product	1	Contig-627	Contig627	65.1	.	65.4	313	N	1	P6-1188904_085_F11	313	332	309	AGVQRISEQVQEGTYKVLKDLCGIWQHSYREETIRNNCEKFIDHVADLYSDIIEEAESVKDVYIQELEKLMKDVTETCKLLSEPLPEECTQDLVLFEAIEILK	3	Ind		1	512	1	524	1	534	1	XC-contig_96	0.17	Unknown product	uk				GA26369	0.13	gi|198453789	40	79	604	23	13	61	0	7	18	1	3	N
cf-contig_317	1	Unknown product	1	Contig-317	Contig317	53.6	.	42.7	199	N	1	CAFL_P1-069_F09	199	218	159	DTCVAHVDRTSALSSPSTWVPMSMGGSGCSGCLRRGEPGQRGHPAAKSPRGEQ	2	Ind		1	65	2	261	1	260	1	XC-contig_77	1.6	Unknown product	uk				GA26398	2E-008	gi|198453473	62.8	61	98	54	63	29	0	10	6	1	-1	N
cf-contig_382	1	Unknown product	1	Contig-382	Contig382	64.4	.	41.9	308	N	1	P15-1189757_078_B10	308	327	204	SGYSEVRFRGCLEVGINCGLVAHVDRTSALSSPSTWVPRGSSGCSGCLRRGEPGQRGHPAAKSPRGEQ	1	Ind		1	65	2	318	1	319	1	XC-contig_68	0.12	Unknown product	uk				GA26398	3E-009	gi|198453473	65.5	59	98	56	61	26	0	3	101	1	-3	N
cf-contig_458	1	Unknown product	1	Contig-458	Contig458	62.7	0.6	74.4	661	N	1	P18-1190073_008_E02	661	680	213	GGIKIDQIEIASAMWMDLDKVMESDVVSEHNQLILQTYICNKENKLSIKHESHFVELLNKPYLLYTIDQTK	3	Cyt		1	372	1	381	1	386	1	XC-contig_52	0.023	Unknown product	uk				GJ15854	0.10	gi|195398829	41.6	62	295	33	21	42	0	225	27	1	3	N
cf-contig_431	1	Unknown product	1	Contig-431	Contig431	42.	1.6	64.2	104	N	1	P17-1189952_011_C01	104	123	60	GAWGHSALXGRGSLIIVNNT	2	Ind		1	350	1	359	1	363	1	XC-contig_232	1	Unknown product	uk				GE20402	80	gi|195492612	30.8	29	303	40	10	18	0	274	4	1	1	N	3.448
cf-contig_164	3	Unknown product	3	Contig-164	Contig164	86.3	0.2	78.6	444	N	3	P10-1189192_085_F11	464	463	219	TAGKXLQEHFREKPKKKHKSKKHKSKKHKCGKKHRKHRKHRNYHYLDDLNEIMKYLEMYEKEHEHENHDHLAE	2	Ind		3	45	2	149	1	146	1	XC-contig_246	0.002	Unknown product	uk				hypothetical protein, conserved	1E-005	gi|118490648	53.5	184	1486	34	12	66	0	472	11	6	-1	N	1.63
cf-contig_308	1	Unknown product	1	Contig-308	Contig308	48.5	.	71.4	866	N	1	CAFL_P1-055_E07	866	885	231	NGRYKIKKRTLPSSNKMRKIKKNSTDEQNEIKDMKLKKDSTDEQTEIKNKKWRRDYTDTLKLKTQNMKRTLLITKLK	1	Cyt		1	249	1	254	1	253	1	XC-contig_27	0.0002	Unknown product	uk				hypothetical protein, conserved	4E-012	gi|118490648	77	209	1486	36	14	113	3	450	165	7	-2	Y	1.435
cf-contig_491	1	Unknown product	1	Contig-491	Contig491	60.8	0.2	78	394	N	1	P19-1190200_067_G09	394	413	135	NFINKLLCEKINIFSCRNIQKNCNLFLSSFQCIIILFKDSLNKIY	1	Ind		1	399	1	408	1	413	1	XC-contig_4	0.007	Unknown product	uk				RNA polymerase beta chain	0.020	gi|31442390	42.7	75	1059	32	7	51	1	198	146	1	-2	N	4
cf-contig_575	1	Unknown product	1	Contig-575	Contig575	57.8	.	78.8	250	N	1	P4-1188694_039_E05	250	269	54	RDVTDVRLYGCSVYLYKI	3	Ind		1	468	1	478	1	487	1	XC-contig_48	0.012	Unknown product	uk				hypothetical protein	0.003	gi|167377133	45.4	75	168	39	45	38	4	90	26	2	-2	N	4
cf-contig_763	1	Unknown product	1	Contig-763	Contig763	61.1	.	81.1		N	1	P11-1189310_065_H09		212	69	AGRPKEIRKNKIDQVEKNKILIH	1	Ind		1	96	2	633	1	648	1	XC-contig_203	0.002	Unknown product	uk				hypothetical protein	0.045	gi|167379578	41.6	51	123	38	42	41	0	51	12	1	-1	N	3.922
cf-contig_405	1	Unknown product	1	Contig-405	Contig405	62.	.	76.1	136	N	1	P16-1189836_047_A05	136	155	57	GSDDTWLCSYVYEISFVYT	1	Ind		1	331	1	339	1	340	1	XC-contig_112	0.19	Unknown product	uk				hypothetical protein	47	gi|183235110	31.6	39	1342	35	3	26	0	975	5	1	-2	N	2.564
cf-contig_433	1	Unknown product	1	Contig-433	Contig433	60.5	0.4	71.3	451	N	1	P17-1189960_075_C09	451	470	150	GTGGSGIXXPGTAANGAVIGKTVAQVKDHAASPKILQRTKKLQDRHEGHI	3	Ind		1	351	1	360	1	364	1	XC-contig_212	0.025	Unknown product	uk				hypothetical protein	0.66	gi|183236227	37.7	91	111	25	83	79	0	5	119	1	-2	N	7.692
cf-contig_427	1	Unknown product	1	Contig-427	Contig427	64.7	.	73.6	465	N	1	P17-1189937_080_A10	465	484	393	QSGLESFQNPAKSLTDGQGLQKHVDTFRNSLQNSGKEFSNQIQSHTDKFSESASHLKTQANEVSGKVTGKTRELFSNFQKQMSALMQSVNEKFSKIKERAQKYFKDAETKLKELSSRFSSQLRKTSEGSHQ	1	Cyt		1	22	3	19	3	18	3	XC-contig_74	0.04	Unknown product	uk				conserved hypothetical protein	2E-004	gi|257882746	49.7	93	200	30	47	65	0	29	100	1	1	N
cf-contig_660	1	Unknown product	1	Contig-660	Contig660	64.1	.	72.3	357	N	1	P8-1189063_010_D02	357	376	168	GRPGIYRRTINDNLIEFSNNTSLEHGFKLTDRNAMYHIYNKMLPKLRKLLEQQRTK	3	Ind		1	539	1	551	1	563	1	XC-contig_35	0.055	Unknown product	uk				ribosomal protein S4-like protein	7.3	gi|169806228	34.3	23	180	64	13	9	0	35	81	1	3	N
cf-contig_544	1	Unknown product	1	Contig-544	Contig544	58.3	.	73.5	280	N	1	P3-1188560_029_B03		310	93	EGFHKMIDVSKYHLNVKIYSFNIICCILNYA	3	Ind		1	446	1	456	1	462	1	XC-contig_167	0.29	Unknown product	uk				separase, predicted	36	gi|169806030	32	69	701	32	10	47	9	169	27	1	-3	N	2.899
cf-contig_434	1	Unknown product	1	Contig-434	Contig434	60.2	.	69.9	247	N	1	P17-1189961_076_C10	247	266	66	MEPPWALVNETISGLMNSTTGA	1	Ind		1	74	2	66	2	61	2	XC-contig_5	0.32	Unknown product	uk				predicted protein	47	gi|195183252	31.6	54	178	27	31	40	2	60	68	1	-2	N	1.852
cf-contig_481	1	Unknown product	1	Contig-481	Contig481	56.3	.	72	138	N	1	P19-1190178_087_E11	138	157	69	GPLRPGIKSYAKFSATPRYMTYN	1	Ind		1	391	1	400	1	405	1	XC-contig_171	0.14	Unknown product	uk				putative 26S protease regulatory subunit 70-like protein	0.23	gi|349592805	39.3	16	189	100	9	0	0	173	19	1	1	N
cf-contig_419	1	Unknown product	1	Contig-419	Contig419	61.9	.	75.8	266	N	1	P16-1189896_037_F05	266	285	87	YLNDSIFSSSVSHIFMPLLSLKTAVMKFV	1	Ind		1	341	1	350	1	353	1	XC-contig_171	0.001	Unknown product	uk				membrane bound O-acyl transferase MBOAT family protein	37	gi|229917489	32	44	483	32	9	31	0	11	70	1	1	N	4.545
cf-contig_483	1	Unknown product	1	Contig-483	Contig483	59.9	.	82.4	106	N	1	P19-1190185_038_F06	106	125	72	VIEVNDFINCFNLAGLCCEIIIVK	3	Ind		1	393	1	402	1	407	1	XC-contig_97	0.31	Unknown product	uk				hypothetical protein Fisuc_0078	80	gi|261414492	30.8	23	172	54	14	11	0	118	32	1	-2	N
cf-contig_381	1	Unknown product	1	Contig-381	Contig381	65.8	.	75.3	398	N	1	P15-1189755_062_B08	398	417	150	YFISSIVYIFQKTVTNVNFYNVQPISKRLILRFYKEYIYLYKCIIEILHI	2	Ind		1	310	1	317	1	318	1	XC-contig_209	0.094	Unknown product	uk				membrane protein of unknown function	0.84	gi|332678555	37.4	52	443	33	12	35	4	88	240	1	3	N	5.769
cf-contig_383	1	Unknown product	1	Contig-383	Contig383	62.7	.	72.4	456	N	1	P15-1189758_093_B11	456	475	117	RPGVVMVVEQLWVDSNVMLIEMEVETTKDLNHHIDDADL	2	Ind		1	311	1	319	1	320	1	XC-contig_44	0.13	Unknown product	uk				hypothetical protein HMPREF0404_00503	0.65	gi|336400433	37.7	103	579	33	18	74	15	315	167	1	-1	N	2.913
cf-contig_557	1	Unknown product	1	Contig-557	Contig557	54.9	.	62	194	N	1	P3-1188615_070_F10	194	213	123	PDNDAFSLQESLILPENHAFSLQKYIINQKSQAFSKKKKKK	2	Ind		1	454	1	464	1	471	1	XC-contig_26	1.6	Unknown product	uk				unknown	7.1	gi|537504	34.3	37	146	47	26	20	0	91	46	1	1	N	2.703
cf-contig_795	1	Unknown product	1	Contig-795	Contig795	57.8	0.7	73.8	283	N	1	P12-1189352_025_D03	283	302	126	SSTNSNQLLLLLNLLQISTTINRTENDHNPDNPHNPTSTIRY	3	Ind		1	639	1	660	1	676	1	XC-contig_47	0.38	Unknown product	uk				CAAX amino terminal protease	36	gi|317496470	32	64	313	32	21	44	2	41	64	1	-3	N	4.688
cf-contig_442	1	Unknown product	1	Contig-442	Contig442	28.1	.	77.7	263	N	1	P17-1189994_053_F07	263	282	144	KKKGKGKKKKGNFKLKKGKKKPILKKKKKITSPKRERKRENLKKKKKK	2	Ind		1	358	1	367	1	372	1	XC-contig_237	1e-07	Unknown product	uk				hypothetical protein GobsU_39742	2E-005	gi|168705732	52.8	71	95	46	76	36	0	5	2	3	-1	Y	1.408
cf-contig_722	1	Unknown product	1	Contig-722	Contig722	65.1	.	71.5	475	N	1	P10-1189170_007_E01	475	494	321	RPGHREKRSRKYFIKIYYWNDKRTCCPTQLKVEGCEDPSTGRCYLDKYQKLVKNIRIGKKKLLKCEKLAQLVLPQVLAQIEAEKAAKKQCKKDESLIEKQKITSKDE	1	Ind		1	585	1	601	1	614	1	XC-contig_72	0.058	Unknown product	uk				lysosomal/prostatic acid phosphatase	0.85	gi|289741357	37.4	57	394	23	15	48	0	323	10	1	1	N
cf-contig_680	1	Unknown product	1	Contig-680	Contig680	56.1	.	71.6	83	N	1	P9-1188453_032_A04	83	102	84	NRENEKKKVRERKKARKKQRNKEKKKKK	1	Ind		1	554	1	568	1	580	1	XC-contig_203	0.0003	Unknown product	uk				n-terminal acetyltransferase catalytic subunit	3.2	gi|320589698	35.4	20	793	76	3	5	0	713	15	1	-2	N
cf-contig_174	1	Unknown product	1	Contig-174	Contig174	58.8	.	72.7	157	N	1	P5-1188749_096_A12	157	176	60	IMYVAKNAVKRRPTKKKKKK	1	Ind		1	153	1	155	1	153	1	XC-contig_115	0.047	Unknown product	uk				NADH dehydrogenase subunit 2	1.1	gi|164614686	37	39	327	43	12	23	0	255	2	1	-2	N
cf-contig_473	1	Unknown product	1	Contig-473	Contig473	46.7	.	68.2	519	N	1	P19-1190132_013_B01	519	538	183	KEKKWRGKRRKGSKIRQKRSDPKGEAKKKLRSNKKKDRKSTEHKVRLCKENKKSVVKKENR	3	Ind		1	384	1	393	1	398	1	XC-contig_206	6e-08	Unknown product	uk				hypothetical protein EAI_01038	1E-018	gi|307202798	96.7	188	288	32	66	114	0	38	1	17	2	Y	4.255
cf-contig_676	1	Unknown product	1	Contig-676	Contig676	27.6	.	74.1	151	N	1	P8-1189115_034_H06	151	170	165	KKKKPVFKKKKKNQKKKKGKRGKNRKGKKGKKNPPIEKHGGKKGEPKKRGKKKKK	2	Ind		1	551	1	564	1	576	1	XC-contig_246	8e-05	Unknown product	uk				hypothetical protein EAI_08497	0.020	gi|307208538	42.7	67	99	48	69	25	0	14	1	9	1	Y	1.493
cf-contig_173	2	Unknown product	2	Contig-173	Contig173	70.9	.	70.9	321	N	2	P20-1190257_042_D06	331	340	108	FVEYKKKIEVNRKRRSLEYEKNILRNKKKNENWMED	2	Ind		2	152	1	154	1	152	1	XC-contig_206	0.0006	Unknown product	uk				hypothetical protein HPF16_1300	0.015	gi|317178108	43.1	90	108	36	84	43	3	14	79	5	-2	N	1.111
cf-contig_330	1	Unknown product	1	Contig-330	Contig330	62.9	.	82.6	199	N	1	P1-1152496_077_B09	199	218	108	EMKVHLVWNHFQKIGKISIKLNVKFCVLKFNKIFHT	1	Ind		1	67	2	59	2	56	2	XC-contig_66	0.24	Unknown product	uk				hypothetical protein HAN_1g65	35	gi|160331055	32	55	821	31	7	39	0	99	24	1	-1	N	3.636
cf-contig_789	1	Unknown product	1	Contig-789	Contig789	49.8	.	75.8	76	N	1	P12-1189337_094_B12	76	95	93	AGDKWYKYINYVNIILYVAVLLLEAKKKKKK	1	Ind		1	634	1	655	1	671	1	XC-contig_129	0.037	Unknown product	uk				G-protein coupled receptor 87	61	gi|351712292	31.2	21	383	54	6	10	0	312	4	1	1	N
cf-contig_549	1	Unknown product	1	Contig-549	Contig549	65.4	.	71.2	436	N	1	P3-1188589_058_D08	436	455	177	IYTVKGFIFFYGCLYSVVEIFYFFLVMVKRSAFKNIYCLCRKYIFYLFDVFEFVSNLSG	1	Ind		1	84	2	76	2	69	2	XC-contig_206	0.0001	Unknown product	uk				NADH dehydrogenase subunit 1	0.045	gi|302151393	41.6	218	277	54	79	17	0	57	22	2	-3	Y
cf-contig_161	1	Unknown product	1	Contig-161	Contig161	20.8	.	65.3	278	N	1	P7-1188930_015_A01	278	297	153	IVMYLRSFVSGVYCLADGCFVQYEANSVQPLIACAKDQQNHLARQFSSQLI	3	Cyt		1	146	1	146	1	143	1	XC-contig_127	0.1	Unknown product	uk				hCG16363	28	gi|119626104	32.3	64	114	37	57	43	0	7	10	1	-1	N	1.563
cf-contig_254	1	Unknown product	1	Contig-254	Contig254	47.3	.	73.5	83	N	1	CAFM_P2-030_B04	83	102	99	YRICNGEKIFANYVANKDLICRFYKEHKKKKKK	2	Ind		1	202	1	205	1	203	1	XC-contig_116	0.18	Unknown product	uk				hypothetical protein	21	gi|51476527	32.7	19	313	70	6	6	0	195	20	1	2	N
cf-contig_759	1	Unknown product	1	Contig-759	Contig759	60.1	.	48.9	122	N	1	P11-1189295_036_G06	122	141	105	RAATREAEARESLEPGRRGCSQPSWCHCTPAWVIE	3	Ind		1	25	3	21	3	645	1	XC-contig_22	0.12	Unknown product	uk				OK/SW-CL.41	1E-005	gi|21104464	53.5	35	109	75	33	9	0	2	8	1	-3	N	2.857
cf-contig_742	1	Unknown product	1	Contig-742	Contig742	37.2	0.8	66.7	107	N	1	P11-1189248_059_C07	107	126	69	GGRGNRAITAGTDNLIHSKYHLL	1	Ind		1	85	2	77	2	70	2	XC-contig_184	0.034	Unknown product	uk				SH3-domain interacting protein	57	gi|2760483	25.4	34	494	72	7	3	0	350	1	2	-1	N
cf-contig_252	1	Unknown product	1	Contig-252	Contig252	61.7	.	76.4	439	N	1	CAFM_P2-095_A11	439	458	120	ISDNMRILEFAEYTKKFTFCTRFIVISNGILFYVYCYLQK	2	Ind		1	200	1	203	1	201	1	XC-contig_115	0.25	Unknown product	uk				hypothetical protein IMG5_053120	1.1	gi|340507477	37	133	426	29	31	97	15	257	65	1	-2	N	5.263
cf-contig_376	1	Unknown product	1	Contig-376	Contig376	64.	.	72.9	354	N	1	P14-1189596_049_H07	354	373	153	IQIGNGEDSIESIGKNVITDEHRRKAQKNIEERKKKEAEEKKKRENRRVVV	2	Ind		1	305	1	312	1	313	1	XC-contig_246	4e-06	Unknown product	uk				hypothetical protein IMG5_067010	8E-004	gi|340506845	47.4	66	168	44	40	35	4	5	36	2	-1	Y
cf-contig_191	1	Unknown product	1	Contig-191	Contig191	60.2	.	81.9	163	N	1	P9-1188471_078_B10	163	182	129	INLIKYNLIIILYSEANVKLNFIICLFIIMPINDINALKKKKK	2	Ind		1	13	4	11	4	9	4	XC-contig_220	0.014	Unknown product	uk				hypothetical protein IMG5_126020	27	gi|340504213	32.3	37	67	48	57	20	0	14	31	1	-3	N
cf-contig_354	1	Unknown product	1	Contig-354	Contig354	63.5	.	83.3	191	N	1	P14-1189509_032_A04	191	210	72	LFLYKYHSIVLNKLPSYNKKKKKK	2	Ind		1	285	1	292	1	292	1	XC-contig_156	0.23	Unknown product	uk				hypothetical protein IMG5_145480	79	gi|340503360	30.8	52	381	37	14	35	2	26	16	1	-1	N	7.692
cf-contig_671	1	Unknown product	1	Contig-671	Contig671	63.4	.	78.8	151	N	1	P8-1189094_069_F09	151	170	90	CFLSVNKYLALILLNYKMYLSNKKYMLRKY	1	Ind		1	548	1	560	1	572	1	XC-contig_201	0.0001	Unknown product	uk				hypothetical protein IMG5_183080	27	gi|340501323	32.3	27	216	42	13	20	0	119	41	1	-2	N
cf-contig_264	1	Unknown product	1	Contig-264	Contig264	61.2	.	78.7	197	N	1	CAFM_P2-091_C11	197	216	93	NCNNITNIPNNNILPLCNNTFTIKSKKKKKK	2	Ind		1	211	1	215	1	213	1	XC-contig_217	0.24	Unknown product	uk				hypothetical protein IMG5_202280	7.1	gi|340500150	34.3	40	413	40	10	26	0	107	12	1	-2	N
cf-contig_558	1	Unknown product	1	Contig-558	Contig558	53.7	.	80.6	110	N	1	P3-1188618_003_G01	110	129	72	PGFNIVFEVVIYIYIYKLIFMYSY	1	Ind		1	455	1	465	1	472	1	XC-contig_215	0.099	Unknown product	uk				morn domain repeat protein	94	gi|340508676	27.7	30	593	70	5	5	0	35	16	2	-2	Y	3.333
cf-contig_357	1	Unknown product	1	Contig-357	Contig357	62.4	.	85.2	224	N	1	P14-1189520_029_B03	224	243	87	LSMFELIKIGPKNIIIVIICIKYIFVNIV	3	Ind		1	288	1	295	1	295	1	XC-contig_24	0.044	Unknown product	uk				PAS domain S-box family protein	0.38	gi|340503692	38.5	62	816	37	8	44	0	663	8	1	-3	N	6.452
cf-contig_779	1	Unknown product	1	Contig-779	Contig779	61.3	.	75	161	N	1	P13-1189473_022_F04	161	180	60	KYFKLSRTHKHGYFLVRKCI	1	Ind		1	625	1	646	1	662	1	XC-contig_89	0.004	Unknown product	uk				phospholipid-translocating p-type flippase family protein, putative	12	gi|340504725	33.5	30	1171	46	3	17	0	1094	50	1	-3	N	6.667
cf-contig_211	2	Unknown product	2	Contig-211	Contig211	87.9	.	69.9	409	N	2	P8-1189091_038_F06	416	428	291	GCRRMSFAAIVAGLGGKDNYKICGEDKPLGWPKHGAMIIGELHTESKSRDKYFKLLYWDPDEEKPQQLHLNGCKGCTWYQYWFSTSDITKDNKKCQV	1	Cyt		2	52	2	45	2	42	2	XC-contig_226	0.12	Unknown product	uk				sodium hydrogen, putative	0.045	gi|340508187	41.6	74	335	30	22	52	7	126	202	1	1	N	1.351
cf-contig_212	1	Unknown product	1	Contig-212	Contig212	64.5	.	70.9	369	N	1	P14-1189572_053_F07	369	388	240	RNYKICGEDKPLGWPKHGAMIMGELYTESKSRDKYFKLLYWDPDEEKPQQLHLNRCKGCTWYQYWFSTSDITKDNKKCQV	3	Cyt		1	52	2	45	2	42	2	XC-contig_226	0.15	Unknown product	uk				sodium hydrogen, putative	0.10	gi|340508187	40.4	69	335	30	21	49	7	132	180	1	3	N	1.449
cf-contig_318	1	Unknown product	1	Contig-318	Contig318	65.	.	74.9	172	N	1	CAFL_P1-004_G02	172	191	96	SREIYIPYDGSIVLLRRLDRFLYEMFYMNLVV	2	Ind		1	256	1	262	1	261	1	XC-contig_236	0.055	Unknown product	uk				TRM1 tRNA methyltransferase 1, putative	81	gi|340502936	30.8	29	545	33	6	22	0	237	27	1	3	N	3.448
cf-contig_185	4	Unknown product	4	Contig-185	Contig185	77.	.	80.3	352	N	4	P4-1188681_026_D04	352	371	123	PGYTSCCPLEQYKNLVRNTRIGKEELEKRNTKCTIPMQGNN	3	Ind		4	160	1	162	1	160	1	XC-contig_7	0.015	Unknown product	uk				vacuolar sorting receptor, putative	0.30	gi|340506194	38.9	59	622	37	10	43	0	473	134	1	-2	N	8.475
cf-contig_388	1	Unknown product	1	Contig-388	Contig388	60.7	.	83	199	N	1	P15-1189773_010_D02	199	218	90	SFVVKCNSKFCFVLLIKINSSFKAKKKKKK	1	Ind		1	316	1	324	1	325	1	XC-contig_111	0.013	Unknown product	uk				maturase K	16	gi|124358489	33.1	58	502	33	12	40	0	63	12	1	-1	N	3.448
cf-contig_487	1	Unknown product	1	Contig-487	Contig487	57.2	0.6	72.2	290	N	1	P19-1190195_020_G04	290	309	108	KSTEAPKITTTTENTVKEMLIKFNDGTTQLTTNRKN	3	Ind		1	397	1	406	1	411	1	XC-contig_40	0.29	Unknown product	uk				hypothetical protein Isop_1620	2.5	gi|320103162	35.8	34	843	48	4	18	0	244	29	1	-3	N
cf-contig_602	1	Unknown product	1	Contig-602	Contig602	60.5	0.3	66.1	270	N	1	P5-1188784_089_D11	270	289	186	FCDLSACLIYIFITRKLHIDTYRNLLVIKSFLEMHPKQTKLGFPRTWRGTQTKGVAQKKKKK	2	Ind		1	489	1	501	1	511	1	XC-contig_205	0.27	Unknown product	uk				Acyl-coenzymeA:ethanol O-acyltransferase	13	gi|254565935	33.5	42	452	39	10	26	1	344	23	1	-1	N
cf-contig_207	1	Unknown product	1	Contig-207	Contig207	53.1	0.2	74.5	443	N	1	P1-1152489_014_B02	443	462	108	YIHHILCFINIHEPVMHQYLVQLIIFIRIITSENLY	2	Ind		1	51	2	44	2	41	2	XC-contig_99	0.31	Unknown product	uk				toxin secretion/phage lysis holin	21	gi|194466745	32.7	55	144	30	39	39	0	3	127	1	-1	N	5.455
cf-contig_218	2	Unknown product	2	Contig-218	Contig218	72.	0.2	79.2	576	N	2	P11-1189264_089_D11	576	595	168	NLSNIHLIGKKLVNPMEQFPVNSNWCSGINLEEKSSTDFHTKLYKNFPLKIFRIYK	3	Cyt		2	176	1	179	1	177	1	XC-contig_75	0.004	Unknown product	uk				A 'c' was inserted after nt 369 (=nt 10459 in genomic sequence (M10126)) to	1.1	gi|340613	37.7	159	355	26	45	124	14	171	44	1	-1	N	5.66
cf-contig_33	1	Unknown product	1	Contig-33	Contig33	63.2	.	72	309	N	1	P19-1190140_077_B09	309	328	147	KTSCKWNSVLRQLWHRALRQIAGTSRTVTKCSWNTECFQIDYYKYCNIV	3	Ind		1	1	14	2	9	2	7	XC-contig_209	0.15	Unknown product	uk				hypothetical protein Lebu_0038	7.2	gi|257124849	34.3	40	272	41	15	24	1	205	181	1	1	N	5
cf-contig_503	1	Unknown product	1	Contig-503	Contig503	57.9	.	73.5	117	N	1	P20-1190254_025_D03	117	136	90	RGKIWVSVSLTKEYVCLTYNEIINLNVTYA	2	Ind		1	411	1	420	1	425	1	XC-contig_241	1e-06	Unknown product	uk				putative membrane protein	46	gi|262038046	31.6	32	588	44	6	19	0	311	7	1	-2	N
cf-contig_732	1	Unknown product	1	Contig-732	Contig732	42.2	.	67.6	648	N	1	P10-1189200_051_G07	648	667	258	LKEFYLLDLLYEFHLTKGKNKKDKENTLGPPSHYIYRMSPICQADVNAITRLDFELSLSICAHFRNYLLKPALFFNVEIVRHCVKS	2	Cyt		1	593	1	609	1	622	1	XC-contig_123	0.0007	Unknown product	uk				hypothetical protein LpseK3_04098	6.9	gi|339480903	35.4	56	513	35	11	37	0	68	290	1	-1	N	1.786
cf-contig_26	4	Unknown product	4	Contig-26	Contig26	88.2	.	71.9	254	N	4	P2-1190428_073_D09	278	274	126	KISKKIIIFTQIIKTNILHFFKCKRNLMIVILKLKCNIKINT	1	Ind		4	6	4	6	4	85	1	XC-contig_132	0.014	Unknown product	uk				hypothetical protein LOAG_05167	1.1	gi|312076194	37	50	261	37	20	32	0	156	99	1	-3	N
cf-contig_401	1	Unknown product	1	Contig-401	Contig401	64.	.	73.1	282	N	1	P15-1189824_033_H05	282	301	192	KYDSSTQQVKGFCNQFPNDSIWKKSKDCDDFCEKHCDPYIHGQCYEYVMRGSTEDCYCTQRRYG	3	Ind		1	327	1	335	1	336	1	XC-contig_174	0.15	Unknown product	uk				hypothetical protein LOAG_05167	1.9	gi|312076194	36.2	127	261	26	49	76	12	63	4	2	-2	N	1.575
cf-contig_479	1	Unknown product	1	Contig-479	Contig479	58.1	.	73.3	412	N	1	P19-1190169_008_E02	412	431	144	RHNHHLPLFFFKISFYLFQSYLLLYRLFKYINICTIYDLIFSSIYVTL	2	Ind		1	389	1	398	1	403	1	XC-contig_178	0.025	Unknown product	uk				hypothetical protein LOAG_12322	0.85	gi|312094022	37.4	62	112	32	56	45	0	36	207	1	3	N	6.452
cf-contig_768	1	Unknown product	1	Contig-768	Contig768	55.2	.	72.2		N	1	P13-1189422_013_B01		187	108	GPGYRHYGRVQEHNKDFFKFTTLTKKFLINIYTYYL	3	Ind		1	76	2	68	2	63	2	XC-contig_217	0.003	Unknown product	uk				hypothetical protein LOAG_12951	1.1	gi|312095926	37	51	120	32	43	35	0	52	32	1	-1	N	3.922
cf-contig_43	1	Unknown product	1	Contig-43	Contig43	62.2	.	76.2	225	N	1	P11-1189235_046_B06	225	244	114	RPGHRVLRQIAGPYRTAMKYLRKTECFKIDYYKYCNII	1	Ind		1	1	14	2	9	2	7	XC-contig_209	0.15	Unknown product	uk				hypothetical protein LOAG_15386	16	gi|312107477	33.1	57	157	34	37	41	0	77	25	1	-2	N	3.509
cf-contig_85	1	Unknown product	1	Contig-85	Contig85	61.7	.	73.7	148	N	1	P19-1190159_026_D04	148	167	120	GHPKLTLRNKEILAHNFANITNAYTKVFLPTCDKLSIVKA	2	Ind		1	35	2	28	2	26	2	XC-contig_191	0.38	Unknown product	uk				glycoprotein 1	16	gi|3860432	33.1	22	309	56	7	10	0	114	11	1	2	N
cf-contig_314	1	Unknown product	1	Contig-314	Contig314	60.9	.	77.7	326	N	1	CAFL_P1-038_F06	326	345	114	NFCTRSCEVDGGYCSNNICMCDGRKSAPRNQDYSHLRD	2	Ind		1	64	2	57	2	54	2	XC-contig_64	0.01	Unknown product	uk				NADH dehydrogenase subunit 1	1.5	gi|56714992	36.6	94	306	32	31	67	3	40	2	1	-3	N	6.383
cf-contig_58	1	Unknown product	1	Contig-58	Contig58	61.	.	71.7	193	N	1	P4-1188723_068_G10	193	212	159	GGAQRMEPWNELHAEYHRYILDLEEKRKLKEKKINNSILHTTYLCCIDSNKLS	3	Cyt		1	107	1	101	1	96	1	XC-contig_175	0.12	Unknown product	uk				NADH dehydrogenase subunit 4	3.2	gi|129566162	35.4	48	437	34	11	32	2	56	52	1	-3	N
cf-contig_425	1	Unknown product	1	Contig-425	Contig425	61.4	.	76.5	130	N	1	P17-1189929_016_A02	130	149	111	IIYNVFVLLYFFKLVCTDLYYFYNEIKSVCLKKKKKK	1	Ind		1	346	1	355	1	358	1	XC-contig_66	0.031	Unknown product	uk				NADH dehydrogenase subunit 4	28	gi|129566162	32.3	28	437	37	7	18	0	79	17	1	2	N	3.571
cf-contig_578	1	Unknown product	1	Contig-578	Contig578	51.	.	77.7	282	N	1	P4-1188705_022_F04	282	301	69	KYYIQLNFMVDDSNNLILKLEEY	1	Ind		1	471	1	481	1	490	1	XC-contig_63	0.2	Unknown product	uk				hypothetical protein Metbo_0853	3.2	gi|325958609	35.4	68	383	27	18	50	0	43	56	1	-1	N	1.471
cf-contig_672	1	Unknown product	1	Contig-672	Contig672	62.8	.	80.8	189	N	1	P8-1189107_068_G10	189	208	120	NGHIYQKIYIINKIIKLSLYNIIGIIDFENKIILYDIRVY	1	Ind		1	549	1	561	1	573	1	XC-contig_44	0.034	Unknown product	uk				carbamoyl-phosphate synthase large subunit	36	gi|333986649	32	31	1062	46	3	17	0	432	13	1	1	N
cf-contig_295	1	Unknown product	1	Contig-295	Contig295	65.2	.	68.5	635	N	1	CAFL_P1-043_C05	635	654	159	LVNHSNKILQKIIQDSTNEQPLLQDAKTKRVKGILLTSKLKVQNKKELDEQIE	2	Ind		1	237	1	242	1	241	1	XC-contig_96	0.057	Unknown product	uk				glycosyltransferase	0.092	gi|84489048	41.6	117	915	28	13	90	6	335	192	1	3	N	5.983
cf-contig_399	1	Unknown product	1	Contig-399	Contig399	43.	0.7	56.9	134	N	1	P15-1189815_052_G08	134	153	150	GDRXIGPLRPGPFCPTVQHLMRKLFINISHKPSCSLRSTLRSGWKKKKKK	2	Ind		1	325	1	333	1	334	1	XC-contig_128	0.069	Unknown product	uk				serine/threonine protein kinase	95	gi|238060013	26.2	29	609	71	5	4	0	319	1	2	-1	N
cf-contig_619	1	Unknown product	1	Contig-619	Contig619	55.5	.	81.5	127	N	1	P6-1188871_010_D02	127	146	57	IKKLEISKKKKKKEKKKKK	3	Ind		1	505	1	517	1	527	1	XC-contig_247	0.009	Unknown product	uk				NADH dehydrogenase subunit 4 (mitochondrion)	37	gi|353526364	32	20	364	61	6	8	0	300	35	1	-2	N
cf-contig_475	1	Unknown product	1	Contig-475	Contig475	63.5	.	73.3	273	N	1	P19-1190142_093_B11	273	292	222	PGEDDLHLIEDDSENPKYNPALDSECAKFCSQNCGTLFGICAHEDLKDEGFGDSDKCYCAYSSEHYEIVENKNE	2	Ind		1	386	1	395	1	400	1	XC-contig_44	0.008	Unknown product	uk				hypothetical protein	0.23	gi|167534027	39.3	76	1525	28	5	55	4	748	39	1	-3	N
cf-contig_513	1	Unknown product	1	Contig-513	Contig513	60.4	.	77.1	160	N	1	P20-1190306_049_H07	160	179	87	YNLDWHLFLFYLCYLFYRYIIFDLFNMFV	1	Ind		1	418	1	427	1	432	1	XC-contig_209	0.015	Unknown product	uk				hypothetical protein	16	gi|167537471	33.1	47	608	54	8	11	0	244	52	3	1	N
cf-contig_523	1	Unknown product	1	Contig-523	Contig523	57.1	0.5	66.5	794	N	1	P2-1190425_042_D06	794	813	165	MQSIYIQGVPVENMNLPKAYAEQKDLSALSIMVSFFGFFNFPKEGFMFSSKGSIR	3	Cyt		1	427	1	436	1	441	1	XC-contig_110	0.044	Unknown product	uk				hypothetical protein	0.51	gi|167537590	28.9	81	883	27	9	49	1	338	362	3	1	Y	2.469
cf-contig_443	1	Unknown product	1	Contig-443	Contig443	63.1	.	71.9	316	N	1	P17-1190007_052_G08	316	335	204	SLYDNNREVIHIVLDTLCISMLPIFYLYHRLVLIFRFVREQCTKVHILDSFCVCFVVSCLFELLKFVK	3	Cyt		1	359	1	368	1	373	1	XC-contig_151	0.83	Unknown product	uk				glycosyl transferases group 1	7.2	gi|326576937	34.3	35	386	41	9	21	1	173	2	1	2	N	2.857
cf-contig_35	1	Unknown product	1	Contig-35	Contig35	64.8	.	72.9	247	N	1	P2-1190438_055_E07	247	266	123	AGWGGWHRALRQIAGTSRTVTKRSRNIECFQIDYYKYCIIV	3	Ind		1	1	14	2	9	2	7	XC-contig_54	0.019	Unknown product	uk				multimerin 2, isoform CRA_a	16	gi|148692931	33.1	44	943	37	5	28	2	745	1	1	-3	N	2.273
cf-contig_135	1	Unknown product	1	Contig-135	Contig135	46.1	.	61.8	615	N	1	P5-1188801_022_F04	615	634	177	TAGGVCVCVCVCVCVCMYVCMCVYVCADTNFRRRFREHGSTDLNNSKNIRFVLIRRRAD	1	Cyt		1	11	4	10	4	8	4	XC-contig_110	4e-07	Unknown product	uk				unnamed protein product	1E-006	gi|26334693	57.4	53	118	43	46	33	0	51	8	4	3	Y	3.774
cf-contig_679	1	Unknown product	1	Contig-679	Contig679	59.3	.	51.9	112	N	1	P9-1188451_016_A02	112	131	126	GLRRRLYGKLSLRGCQLAHLCDGQQCNRTSRTKGDDPKKKKK	2	Ind		1	553	1	567	1	579	1	XC-contig_146	0.35	Unknown product	uk				Rieske (2Fe-2S) iron-sulfur domain protein	36	gi|353183727	32	23	378	54	6	11	0	154	30	1	-1	N
cf-contig_291	1	Unknown product	1	Contig-291	Contig291	62.9	.	70.5	727	N	1	CAFL_P1-078_B10	727	746	210	KSQFGGGKVCNVFKRYRRRLGSFKAESTRIGINSSWLFVMFLSHVAIQGATSCEWNLTLGTEKVAVHVAT	1	Ind		1	233	1	238	1	237	1	XC-contig_122	0.004	Unknown product	uk				hypothetical protein Mtub2_02392	7E-007	gi|294993368	58.9	165	179	26	93	97	6	14	238	11	-3	Y	1.212
cf-contig_686	1	Unknown product	1	Contig-686	Contig686	32.1	0.6	77.1	334	N	1	P9-1188472_093_B11	334	353	159	KKKKTKKKGKLKIESGRLKKSNLGKKIKKNKIDQTKNYPKSKPQKKQRINRET	3	Ind		1	559	1	574	1	586	1	XC-contig_23	7e-07	Unknown product	uk				hypothetical protein Mtub2_04996	9E-014	gi|294993873	80.5	226	228	39	100	64	0	0	0	56	-3	Y	0.442
cf-contig_416	1	Unknown product	1	Contig-416	Contig416	58.5	.	78.4	212	N	1	P16-1189889_072_E10	212	231	99	GEKRGEKNNKKKEEKIKQKLKRKHINGKNEIKY	2	Ind		1	4	6	348	1	351	1	XC-contig_246	9e-08	Unknown product	uk				hypothetical protein Mtub2_10695	3E-010	gi|294994954	68.9	249	252	51	99	31	0	0	0	200	-1	Y	0.402
cf-contig_463	1	Unknown product	1	Contig-463	Contig463	48.1	1.7	65.7	159	N	1	P18-1190089_038_F06	159	178	147	GRGXRPITAXGDQDKKKMVKDGKTRNRKREKMRAKKTKIMKKVYKEEKK	3	Ind		1	376	1	385	1	390	1	XC-contig_206	8e-05	Unknown product	uk				hypothetical protein Mtub2_10695	0.50	gi|294994954	38.1	230	252	47	92	19	0	0	0	133	-3	Y
cf-contig_707	1	Unknown product	1	Contig-707	Contig707	54.1	.	77.6	106	N	1	P9-1188535_002_H02	106	125	111	RKQKAKKDENKKIKEKEEKKTKSKKRTNKKTRKKKKK	2	Ind		1	27	3	590	1	603	1	XC-contig_246	1e-07	Unknown product	uk				hypothetical protein Mtub2_10695	0.020	gi|294994954	42.7	248	252	62	99	10	0	0	0	200	-2	Y
cf-contig_713	1	Unknown product	1	Contig-713	Contig713	44.1	0.4	72.9	517	N	1	P10-1189136_029_B03	517	536	324	RIINAYKGKIKRKQKKTKKNKKEKERKKKKENVKNSEKVRKTSKKKKSKENSDKARKEDNKKRKKHKKKNKKSSQYKKGKKKKREKQKKTKKRERGKKKTAPPKTGKK	1	Ind		1	580	1	596	1	609	1	XC-contig_237	2e-09	Unknown product	uk				hypothetical protein Mtub2_10695	1E-030	gi|294994954	136	251	252	47	100	83	0	0	0	48	-2	Y	0.398
cf-contig_394	1	Unknown product	1	Contig-394	Contig394	44.9	0.3	70.6	311	N	1	P15-1189787_024_E04	311	330	162	KKTKEKAKKKKKQTNDQKIKERKGKIKKKKGKRKKNPKRGKNLKKKGKEKKKKK	1	Ind		1	321	1	329	1	330	1	XC-contig_23	2e-06	Unknown product	uk				hypothetical protein Mtub2_11812	4E-012	gi|294995171	75.1	97	101	45	97	46	0	4	32	14	-2	Y	1.031
cf-contig_805	1	Unknown product	1	Contig-805	Contig805	41.7	.	77.3	133	N	1	P12-1189389_020_G04	232	251	165	KSKKRSIKSQKKNRKKKKKKKKIKKGKKKIKKLGKKKKLKRESKKKGKGKKKKKK	1	Ind		1	4	6	669	1	685	1	XC-contig_206	3e-07	Unknown product	uk				hypothetical protein Mtub2_11812	2E-010	gi|294995171	69.7	94	101	48	94	37	0	0	0	26	-2	Y	1.064
cf-contig_748	1	Unknown product	1	Contig-748	Contig748	28.2	.	77.2	139	N	1	P11-1189265_090_D12	139	158	96	KKKREKKKRKGKTRKIRKKRQGVNKRSKKKKT	3	Ind		1	4	6	622	1	636	1	XC-contig_23	2e-06	Unknown product	uk				hypothetical protein Mtub2_20673	2E-005	gi|294996847	52.8	316	345	53	92	21	0	0	0	200	-3	Y
cf-contig_76	11	Unknown product	11	Contig-76	Contig76	93.5	.	69.9	315	N	11	P6-1188922_033_H05	320	335	195	PMEVNVVFRLWQLNNWQTNCTITENHQVVVLDQQPLDKFISADLIKNFNKKNYIINIDKHIALVL	3	Cyt		11	16	3	14	3	14	3	XC-contig_71	0.035	Unknown product	uk				ABC transporter permease	2.5	gi|15828536	35.8	72	474	26	15	55	0	275	51	1	3	N	2.778
cf-contig_18	1	Unknown product	1	Contig-18	Contig18	20.3	.	69	527	N	1	P5-1188747_080_A10	527	546	147	RIHYFTQLSYVGLTHRNYHNRCIISKRLKKKKKREKRKIWTPRPKYLLL	3	Cyt		1	3	9	3	6	81	1	XC-contig_122	0.018	Unknown product	uk				predicted protein	5.3	gi|290974508	35	54	789	32	7	37	3	512	329	1	-3	N
cf-contig_464	1	Unknown product	1	Contig-464	Contig464	60.4	.	74.4	204	N	1	P18-1190100_035_G05	204	223	138	SKTSNFKHSKNIYAEYSKFNNNNIYMKCAIGILPKNKYIECKKKKK	3	Ind		1	377	1	386	1	391	1	XC-contig_90	0.02	Unknown product	uk				predicted protein	7.4	gi|290989659	34.3	47	333	37	14	30	0	61	9	1	3	N	2.128
cf-contig_778	1	Unknown product	1	Contig-778	Contig778	64.1	.	67.4	312	N	1	P13-1189472_021_F03	312	331	207	SKEKPKNRLTRERNTEELKKEKAHFCGGTIKLKTQKRGLSQQARQRELITSEYDSGLAPLKKKEFLYVK	1	Ind		1	624	1	645	1	661	1	XC-contig_139	0.12	Unknown product	uk				probable ATP-dependent RNA helicase CG8611-like	0.85	gi|345483582	37.4	65	961	36	7	42	4	892	13	1	1	N
cf-contig_588	1	Unknown product	1	Contig-588	Contig588	63.9	.	71.9	301	N	1	P5-1188740_031_A03	301	320	138	SFCCQINSIDADELNASDKIISLTLIDTTSENDVYITPEYVRTYIK	1	Ind		1	479	1	490	1	499	1	XC-contig_40	0.062	Unknown product	uk				tudor domain-containing protein 1-like	0.23	gi|345498096	39.3	31	1054	53	3	15	0	1006	37	1	1	N
cf-contig_245	1	Unknown product	1	Contig-245	Contig245	64.1	.	70.4	414	N	1	P7-1189020_049_H07	414	433	339	RPGWTTSSKLLCADELIVAAAIAVLTKPENNIRGSKFDMVVPKHGTALIVELHKSQDQHFVKVLHWNSNADEPKEIKYKSCQNGCTFENFEKMLKETITSYDDDDFDECGIPI	1	Cyt		1	59	2	52	2	49	2	XC-contig_27	1e-06	Unknown product	uk				venom acid phosphatase Acph-1-like	7E-005	gi|345494739	50.8	91	396	29	23	67	5	275	58	1	1	N
cf-contig_327	1	Unknown product	1	Contig-327	Contig327	54.8	0.2	69.4	406	N	1	P1-1152488_013_B01	406	425	255	GPSGIRPXGRDGDMNLTNGYSNSYMNLSLDSNRLHCEMETQTVVDNQTTMNTPIKRKLHRALRRVHTLFRSNYRINNINNSKSNT	2	Cyt		1	264	1	270	1	269	1	XC-contig_90	0.17	Unknown product	uk				hypothetical protein NDAI_0D02140	0.86	gi|343768540	37.4	89	1025	27	9	65	11	413	35	1	2	N	1.124
cf-contig_375	1	Unknown product	1	Contig-375	Contig375	63.1	.	72.5	265	N	1	P14-1189592_017_H03	265	284	87	CKFAIFYSKLCNIPGIVHYNSIMPKKKKK	2	Ind		1	304	1	311	1	312	1	XC-contig_75	0.028	Unknown product	uk				C4-Dicarboxylate transporter	1.4	gi|224372444	36.6	61	336	32	18	42	0	272	62	1	-2	N	6.557
cf-contig_3	4	Unknown product	4	Contig-3	Contig3	90.5	.	75.1	153	N	4	P1-1152511_092_C12	179	173	102	RVVGVEGLIFPILIVVKNINIILICLKQIIYSKI	2	Ind		4	2	11	1	11	1	11	XC-contig_43	0.23	Unknown product	uk				hypothetical protein NAMH_1038	36	gi|224373065	32	31	278	46	12	17	0	138	26	1	2	N	3.226
cf-contig_706	1	Unknown product	1	Contig-706	Contig706	29.	.	78.7	178	N	1	P9-1188531_068_G10	178	197	195	GPTKKKKKKKKKTRIKKKKKGEKKKGGKPFNKKKRVLRKKKTKKKKKPLPKKKKKGEKTKKKKKK	1	Ind		1	574	1	589	1	602	1	XC-contig_203	3e-05	Unknown product	uk				hypothetical protein NEUTE2DRAFT_150180	0.060	gi|350290276	41.2	52	302	46	18	27	0	138	25	3	1	Y
cf-contig_457	1	Unknown product	1	Contig-457	Contig457	58.6	.	74.8	675	N	1	P18-1190071_090_D12	675	694	201	FIDIRKHGTIMLGIDNFIIYKLLKDLIFVWNHFYTIANIYICVSIYLLHVYMYIYIYTYMCIYTHKF	3	Cyt		1	371	1	380	1	385	1	XC-contig_110	0.007	Unknown product	uk				hypothetical protein LOC100587048	5E-005	gi|332232575	52.8	212	259	26	82	81	0	0	0	23	3	Y	1.887
cf-contig_237	3	Unknown product	3	Contig-237	Contig237	87.9	.	71.5	328	N	3	P4-1188683_042_D06	328	347	159	GRGGQNGYGFLTAIFQPLSEIKELLSKLTQMLQAKFNLQNDGESTTGSSNVTQ	2	Ind		3	58	2	51	2	48	2	XC-contig_179	0.13	Unknown product	uk				hypothetical protein NCER_101503	13	gi|300706627	33.5	40	691	39	6	25	0	119	11	1	2	N
cf-contig_228	1	Unknown product	1	Contig-228	Contig228	50.9	.	62.7	421	N	1	P6-1188865_060_C08	421	440	210	YIKKKKPTNRRVVNRWVASHNNTLGHKSYTKTAYKTLKKVKVLIAMETIIIKKKKIFLDFCVLLQKKKKK	3	Ind		1	182	1	185	1	183	1	XC-contig_203	0.0002	Unknown product	uk				unnamed protein product	1.9	gi|313216254	36.2	59	231	36	26	41	2	136	231	1	3	N
cf-contig_137	1	Unknown product	1	Contig-137	Contig137	62.6	.	64.8	487	N	1	P8-1189118_065_H09	487	506	141	GNVLISFWRRQVQPFQRYGAKSAENGNSVFKRTERPILIIQKTFDLY	3	Ind		1	11	4	10	4	8	4	XC-contig_118	0.74	Unknown product	uk				thyrotropin-releasing hormone receptor 3	9.6	gi|283362041	33.9	50	402	31	13	43	0	239	178	1	1	N	6
cf-contig_723	1	Unknown product	1	Contig-723	Contig723	60.8	.	70.4	160	N	1	P10-1189174_039_E05	160	179	96	TVALYAFFYYLVILPYYFPNKGRFILKKKKKK	1	Ind		1	586	1	602	1	615	1	XC-contig_233	0.001	Unknown product	uk				ABC transporter, permease/ATP-binding protein	35	gi|225165212	32	44	581	33	8	30	0	258	1	1	1	N	2.273
cf-contig_287	1	Unknown product	1	Contig-287	Contig287	67.2	.	69.6	218	N	1	CAFL_P1-096_A12	218	237	135	GKCRDKLHKKIKKLKLLYISICEDLNFMDSKILIVCDRIHLRPLI	1	Ind		1	230	1	235	1	234	1	XC-contig_86	0.51	Unknown product	uk				calsenilin-like	4.3	gi|348527274	35	57	334	32	17	39	9	2	57	1	-2	N	1.754
cf-contig_101	1	Unknown product	1	Contig-101	Contig101	64.7	.	78.5	362	N	1	P11-1189293_020_G04	362	381	108	MFSYILRCLCKKSGTEFYVMYILFYSHITVKKQLSN	1	Ind		1	119	1	114	1	111	1	XC-contig_209	0.15	Unknown product	uk				hypothetical protein LOC100709685	5.5	gi|348510568	34.7	65	173	31	38	45	0	31	46	1	1	N	4.615
cf-contig_78	1	Unknown product	1	Contig-78	Contig78	59.9	.	70.5	327	N	1	P20-1190287_086_F12	327	346	165	RGFCKGAFLAVFVFLGFLINGSECTVSTMATQQLANQLHHNGKPSSGGTGPTTFG	3	Cyt		1	16	3	14	3	14	3	XC-contig_71	0.036	Unknown product	uk				adrenomodulin-like protein	4.3	gi|149287098	35	40	101	39	41	25	3	38	54	1	3	N
cf-contig_227	1	Unknown product	1	Contig-227	Contig227	64.5	.	56.1	323	N	1	P3-1188568_093_B11	323	342	180	AGGPAVAISVRAWASSNQSRVRWFDSLYRRSPTSGSFDVKFPLGVIDHNIIRSGYRPSWT	2	Ind		1	55	2	48	2	45	2	XC-contig_155	3	Unknown product	uk				protein FAM102B-like, partial	27	gi|345308652	32.3	31	290	46	11	17	0	24	5	1	-3	N
cf-contig_8	37	Unknown product	37	Contig-8	Contig8	88.8	.	68.8	210	N	37	P13-1189466_071_E09	212	231	135	RGLFLSEKFLQLNQKLEKLKQAVVEELIFPILIVVKKINTFLICL	2	Ind		37	2	11	1	11	1	11	XC-contig_77	0.029	Unknown product	uk				solute carrier family 22, member 23 isoform 2	7.3	gi|291409419	34.3	30	685	48	5	16	0	25	4	1	1	N
cf-contig_32	3	Unknown product	3	Contig-32	Contig32	72.6	.	67.2	511	N	3	P5-1188829_050_H08	495	530	231	YGRGPKRGGGGLGRALAVGAVGAGALMLATGGGGHVIKKTESDVDTPKPKKPAEKNLQNRKQQNNKPPSNGQKMTYV	1	Cyt		3	102	1	94	1	87	1	XC-contig_60	0.071	Unknown product	uk				hypothetical protein OsJ_31365	0.031	gi|222612755	42.4	35	445	53	8	18	0	23	3	1	-1	N	2.857
cf-contig_570	1	Unknown product	1	Contig-570	Contig570	35.2	.	72	138	N	1	P4-1188656_029_B03	138	157	111	GAGESAIYGRGGMLGIFCIFYLISYYYFYFICVIWMK	2	Ind		1	464	1	474	1	482	1	XC-contig_50	0.015	Unknown product	uk				NADH dehydrogenase (quinone)	16	gi|309792512	33.1	30	443	38	7	21	0	320	35	1	2	N	3.333
cf-contig_771	1	Unknown product	1	Contig-771	Contig771	51.	.	58.9	239	N	1	P13-1189440_059_C07	239	258	174	RVGGTVIHNWRFQNLVYYVLMTKKKLLHVIIMYEIRGIFECNGFTCRVPRSILGASKS	3	Ind		1	618	1	639	1	655	1	XC-contig_178	0.59	Unknown product	uk				Cytochrome c oxidase, subunit Vb/COX4 (ISS)	0.035	gi|308799181	42	22	202	82	11	4	0	150	25	1	-1	N
cf-contig_762	1	Unknown product	1	Contig-762	Contig762	65.1	.	75.1	467	N	1	P11-1189302_001_H01	467	486	96	IYLLSCSPLIKYARNSYHYYFIAESIWYIHLL	1	Ind		1	612	1	632	1	647	1	XC-contig_250	0.1	Unknown product	uk				AraC family transcriptional regulator	12	gi|251799494	33.5	51	421	33	12	38	0	307	241	1	-1	N	5.882
cf-contig_610	1	Unknown product	1	Contig-610	Contig610	51.2	.	61.8	151	N	1	P5-1188826_033_H05	151	170	123	RGGGIGLTAGSPPLSYNFLLQIIVKYMLRANNDLKTVKPIK	3	Ind		1	496	1	508	1	518	1	XC-contig_54	0.23	Unknown product	uk				LOW QUALITY PROTEIN: tyrosine-protein kinase STYK1-like	80	gi|332838643	30.8	50	373	31	14	35	3	21	2	1	-2	N	4
cf-contig_414	1	Unknown product	1	Contig-414	Contig414	61.9	.	68.2	302	N	1	P16-1189873_042_D06	302	321	105	IQFSLVAIVVFLWKYHDNFILISSVSNCVLHRSFF	2	Ind		1	338	1	346	1	349	1	XC-contig_57	0.062	Unknown product	uk				cytochrome oxidase subunit I	7.3	gi|224962035	34.3	72	255	34	29	48	4	56	71	1	2	N	2.778
cf-contig_236	3	Unknown product	3	Contig-236	Contig236	88.5	.	78.9	194	N	3	P9-1188532_083_G11	198	213	84	NLNFVHKLIELKFNYYWINQYIFYLYLD	2	Ind		3	186	1	189	1	187	1	XC-contig_135	0.036	Unknown product	uk				hypothetical protein	46	gi|145534095	31.6	44	901	40	5	27	0	274	11	1	2	N	2.273
cf-contig_273	1	Unknown product	1	Contig-273	Contig273	62.1	.	80.5	145	N	1	CAFM_P2-088_E12	145	164	78	NTLQCDKKFFKIFFIIIFSKAIDDNK	3	Ind		1	217	1	222	1	221	1	XC-contig_244	1	Unknown product	uk				hypothetical protein	61	gi|145504727	31.2	35	1631	51	2	19	0	83	24	1	-1	N	2.857
cf-contig_343	1	Unknown product	1	Contig-343	Contig343	53.9	.	71	274	N	1	P1-1152555_052_G08	274	293	99	GGNRAIYGRGVQALDLMKTLTPLQQCSARIIIG	3	Ind		1	276	1	282	1	281	1	XC-contig_175	1.3	Unknown product	uk				hypothetical protein	21	gi|145475435	32.7	50	247	38	21	32	0	6	118	1	-3	N	2
cf-contig_353	1	Unknown product	1	Contig-353	Contig353	62.7	.	75.9	259	N	1	P14-1189508_031_A03	259	278	96	TIMFYNIIILLCNNSKIHILIHLYLCQKKKKK	3	Ind		1	284	1	291	1	291	1	XC-contig_72	0.35	Unknown product	uk				hypothetical protein	12	gi|145553070	33.5	69	2285	27	3	53	6	1944	57	1	3	N	4.348
cf-contig_522	1	Unknown product	1	Contig-522	Contig522	62.6	.	77.7	245	N	1	P2-1190420_009_D01	245	264	96	ICELIDQVNLIMSSMYFIILSKIKKVLAFLDY	1	Ind		1	64	2	57	2	54	2	XC-contig_176	0.066	Unknown product	uk				hypothetical protein	12	gi|145489315	33.5	50	1596	37	3	32	0	1227	79	1	-1	N	2
cf-contig_674	1	Unknown product	1	Contig-674	Contig674	64.4	.	81.1	240	N	1	P8-1189110_001_H01	240	259	135	PGVIYVLYFRITFMLFLGFIIILINTCTYKYNYNECLRICKIFEY	1	Ind		1	550	1	563	1	575	1	XC-contig_209	0.14	Unknown product	uk				hypothetical protein	1.5	gi|145516540	36.6	38	366	35	11	25	0	253	7	1	1	N
cf-contig_734	1	Unknown product	1	Contig-734	Contig734	66.	.	73	529	N	1	P10-1189211_034_H06	529	548	138	LCILYYVNYTQFSTITFIERRLSHRFFTQIKRVLSLLNINKSQVCR	3	Ind		1	594	1	610	1	624	1	XC-contig_64	0.59	Unknown product	uk				hypothetical protein	7.0	gi|145549946	34.7	33	166	47	20	18	0	123	427	1	-3	N	3.03
cf-contig_737	1	Unknown product	1	Contig-737	Contig737	48.4	.	76.2	1011	N	1	P11-1189227_080_A10	1011	1030	174	IFRWCLVIELDLQGTKCSTLKLNFISIFYIIEFCAKILLNIYDFYLILILSCFVGLNI	3	Ind		1	597	1	613	1	627	1	XC-contig_190	0.001	Unknown product	uk				hypothetical protein	1.9	gi|145520901	38.5	83	219	25	38	64	3	88	319	1	-2	N	2.41
cf-contig_629	1	Unknown product	1	Contig-629	Contig629	65.7	.	74	559	N	1	P6-1188910_035_G05	559	578	216	GRVYYLSFCLWISSIFQVTLLFYLNSISSFIAETNYIILSTYIIYLINNFLISKNIFNFYITFISEGTRILL	2	Ind		1	514	1	526	1	536	1	XC-contig_185	2e-11	Unknown product	uk				Endocuticle structural glycoprotein SgAbd-8, putative	2E-004	gi|242025078	50.1	28	158	75	18	7	0	58	14	1	-2	N
cf-contig_22	37	Unknown product	37	Contig-22	Contig22	69.2	.	70.5	608	N	37	P7-1188979_008_E02	609	631	360	ILGNRDPTKSLQYYKEHEGGGQHPVNPGNLDMKHYRTSNRNQGGSDFVKKFQEEKQRMKDNAKQVVDEYKKKLDTMGKDRVRQIKLDDEKKEALERLKQIQDEQRSGKSGGERSRTNKRQ	3	Cyt		37	100	1	92	1	84	1	XC-contig_206	0.011	Unknown product	uk				Osmotic avoidance abnormal protein, putative	7E-004	gi|242020702	48.5	115	813	24	14	94	2	341	168	1	3	N	0.87
cf-contig_703	1	Unknown product	1	Contig-703	Contig703	55.5	.	73	596	N	1	P9-1188524_019_G03	596	615	168	IRTILAYIQSVFKTQLLKYFDKINREYFLQPILCTYIFSIVYLNLVCLLLQVRTNH	2	Ind		1	573	1	588	1	600	1	XC-contig_52	0.26	Unknown product	uk				Type II inositol-1,4,5-trisphosphate 5-phosphatase precursor, putative	0.012	gi|242010076	44.3	25	893	73	3	7	0	865	50	1	2	N
cf-contig_270	1	Unknown product	1	Contig-270	Contig270	58.6	.	71.7	133	N	1	CAFM_P2-007_E01	133	152	99	QKWAITAGMPKMQKIKVLILEELVLKDLENNIF	1	Ind		1	9	4	219	1	218	1	XC-contig_41	4e-07	Unknown product	uk				Pc12g15920	7.3	gi|255934422	34.3	28	608	48	5	15	0	122	17	1	-2	N
cf-contig_404	1	Unknown product	1	Contig-404	Contig404	64.3	0.3	63.9	607	N	1	P16-1189835_032_A04	607	626	378	RGRYCGIKEAEVSEVSSEKAQAEVNVTSSDAKPSDENDHTLKESNGVETNGTNGLKSKIEGNGDVVESSTNGADSDKENDKEAEVNGDNVTNGSTNGVSDEAVQEVKVKKLPADSSPAPAPVEEAA	3	Ind		1	330	1	338	1	339	1	XC-contig_175	0.36	Unknown product	uk				MYB DNA-binding domain protein	4E-004	gi|212543073	49.3	132	691	31	19	95	20	438	21	1	3	N
cf-contig_499	1	Unknown product	1	Contig-499	Contig499	62.1	.	62.5	549	N	1	P20-1190234_061_B07	549	568	309	GGGESALRPGSRRDTSLNEVHPIESAIEVAAKHVTTKNLLRLRCCPPVDTPAPLLFLLCRFAWNLQINFSKRPTYQCYTGLQSNLTINHRFQLFHLFWNRSLS	1	Ind		1	407	1	416	1	421	1	XC-contig_150	0.27	Unknown product	uk				predicted protein	0.24	gi|168018021	39.7	62	361	35	17	42	3	287	6	1	3	N	1.613
cf-contig_656	1	Unknown product	1	Contig-656	Contig656	37.8	.	71.7	550	N	1	P8-1189043_046_B06	550	569	180	KKKKQIQYYLTLLKCFFLTMCVWVGLTGHHSDNIGTFFYLCAPHVQHIYIGNINVYHKSG	3	Cyt		1	92	2	85	2	76	2	XC-contig_219	0.24	Unknown product	uk				conserved hypothetical protein	4.6	gi|301097553	35.4	76	1418	24	5	59	0	408	210	1	-1	N	2.632
cf-contig_548	1	Unknown product	1	Contig-548	Contig548	60.3	.	67.8	432	N	1	P3-1188588_057_D07	432	451	339	GGGEFGITCRDGINGQKNKENNGSQQEQEKQRMLETNEIPQNSNSGTTTSTTTPSSEDEKSSSSNVHENETFKNSSGAYMITYRPVTLLVRIKLFFQELWLRIVIFIRQIIRF	2	Cyt		1	73	2	65	2	60	2	XC-contig_149	9e-05	Unknown product	uk				hypothetical protein PHYSODRAFT_520275	0.004	gi|348670528	45.1	79	317	31	25	55	2	104	2	1	2	N
cf-contig_165	1	Unknown product	1	Contig-165	Contig165	64.7	.	78.6		N	1	P11-1189237_062_B08		281	114	PGARKHRKHRNYHYLDDLNEIIKYLEMYEKEHEKTMTI	2	Ind		1	45	2	150	1	147	1	XC-contig_187	0.003	Unknown product	uk				hypothetical protein	0.100	gi|68064785	40.4	76	663	33	12	53	6	258	59	1	-2	N	6.579
cf-contig_219	1	Unknown product	1	Contig-219	Contig219	52.1	0.3	76.6	639	N	1	P17-1190021_066_H10	639	658	237	LYLCHKYNNNIIFVSNLLVFLFNKKKNNNRGIKNTYNMEKGIKVKRIIPFLIGDKGNGIGELKIYLNGQKAKLGNYNGS	2	Cyt		1	177	1	180	1	178	1	XC-contig_61	0.14	Unknown product	uk				hypothetical protein	0.009	gi|68064847	36.2	173	451	25	39	90	8	39	84	2	3	Y	2.89
cf-contig_526	1	Unknown product	1	Contig-526	Contig526	64.4	.	81.5	256	N	1	P2-1190431_090_D12	256	275	114	NNIYYCDLMKNKIFRYEQLFKYYVLLYSLNNKYTVCTK	1	Ind		1	430	1	439	1	444	1	XC-contig_175	0.037	Unknown product	uk				hypothetical protein	0.85	gi|68070787	37.4	36	1732	41	2	23	0	25	77	1	-2	N	5.556
cf-contig_4	15	Unknown product	15	Contig-4	Contig4	85.6	.	69	183	N	15	P10-1189212_049_H07	161	203	108	RVGEFLQQNQKLEKLKQVVVEELIFPILIVVKNICL	2	Ind		15	2	11	1	11	1	11	XC-contig_1	0.12	Unknown product	uk				hypothetical protein	9.5	gi|70927667	33.9	51	273	40	19	31	4	123	25	1	-3	N	1.961
cf-contig_72	15	Unknown product	15	Contig-72	Contig72	88.4	.	72.4	278	N	15	P14-1189539_076_C10	277	297	189	GSTCKCNGVKVKYKLGESEDSIENIGRGIITEDQKRRAQQIIAEKKKKEEEAKKHNQGRRVVL	2	Ind		15	110	1	104	1	99	1	XC-contig_206	0.001	Unknown product	uk				hypothetical protein	0.020	gi|70947967	42.7	62	229	32	28	43	0	52	20	1	-3	N
cf-contig_122	1	Unknown product	1	Contig-122	Contig122	56.4	1.3	76.9	137	N	1	P2-1190468_001_H01	137	156	66	NVFVFYTCLLNIIFLYRKKKKK	3	Ind		1	41	2	126	1	123	1	XC-contig_90	0.14	Unknown product	uk				hypothetical protein	47	gi|70922294	31.6	37	195	43	19	22	0	16	16	1	-1	N	2.703
cf-contig_184	4	Unknown product	4	Contig-184	Contig184	81.	.	75.3	546	N	4	P1-1152570_081_H11	569	566	237	TAGAYEKIREVMDKLRKQAQPRTDGQRPKTTIMSELLKQKISCKEVKAAKLESAVCAYDCSQHENTGINCEGNACKCPK	1	Cyt		4	159	1	161	1	159	1	XC-contig_253	0.066	Unknown product	uk				hypothetical protein	0.93	gi|70951089	37.7	85	630	32	14	59	0	56	273	1	-1	N	8.235
cf-contig_562	1	Unknown product	1	Contig-562	Contig562	25.1	.	65.7	325	N	1	P3-1188630_001_H01	325	344	222	NLKNFKKIPRVFKRGLFWFFFFFWFFSPREKKAPHPPNPPPREKKKNPLGGGGTKFQKGGGFKKWEKIKKKKKK	1	Ind		1	458	1	468	1	475	1	XC-contig_26	0.0004	Unknown product	uk				hypothetical protein	0.021	gi|70929998	42.7	134	272	38	50	46	0	138	88	4	1	Y	0.746
cf-contig_392	1	Unknown product	1	Contig-392	Contig392	64.5	.	78.6	271	N	1	P15-1189784_007_E01	271	290	78	GRVLSEYGRCLSLLVKNVKIFLTIKV	1	Ind		1	320	1	328	1	329	1	XC-contig_183	0.0001	Unknown product	uk				rps3	0.87	gi|1171597	37.4	147	214	37	69	49	6	13	43	2	2	Y	3.401
cf-contig_20	1	Unknown product	1	Contig-20	Contig20	22.6	0.2	70.3	560	N	1	P1-1152513_010_D02	560	579	297	FREIPNQLPAPPPIANTNAELIIQSPHVEMQILVPTTKILVIVSKSYNLNSFGLQDLRKFAVIITHIAFPHYFTKLKIKTSCVIPKINMYVLSNLMKYI	1	Cyt		1	98	1	90	1	82	1	XC-contig_49	0.036	Unknown product	uk				conserved Plasmodium membrane protein, unknown function	6.3	gi|296004989	35	66	603	34	11	46	0	320	116	1	-3	N	3.03
cf-contig_561	1	Unknown product	1	Contig-561	Contig561	63.8	.	77	238	N	1	P3-1188626_067_G09	238	257	114	RALSDIKDLLSKLTQMLQTRFNLPNNGESDTDSSNLVH	2	Ind		1	58	2	51	2	48	2	XC-contig_123	0.16	Unknown product	uk				conserved Plasmodium membrane protein, unknown function	0.51	gi|258597955	38.1	42	4765	44	1	24	0	4373	93	1	-1	N	4.762
cf-contig_700	1	Unknown product	1	Contig-700	Contig700	63.8	.	76.3	268	N	1	P9-1188517_054_F08	268	287	141	PGRILRFCSNFFKQIFDLWTICKFMSAIHYLLYVYNEMSLMYENEYN	2	Ind		1	570	1	585	1	597	1	XC-contig_67	0.5	Unknown product	uk				conserved Plasmodium protein	7.4	gi|258597466	34.3	65	4469	33	1	46	0	1988	20	1	-2	N	4.615
cf-contig_325	1	Unknown product	1	Contig-325	Contig325	51.7	1.2	70	151	N	1	P1-1152484_079_A09	151	170	123	YYFLLSVQCNANTFLYIGIVLFHTCNMKVINGYISKKKKKK	1	Ind		1	262	1	268	1	267	1	XC-contig_62	0.063	Unknown product	uk				conserved Plasmodium protein, unknown function	61	gi|124507062	31.2	37	1754	34	2	25	0	1328	35	1	-2	N
cf-contig_436	1	Unknown product	1	Contig-436	Contig436	60.1	0.8	74.7	230	N	1	P17-1189964_009_D01	230	249	135	XXRGDEPPRKNICHVCNGKFLRKFTYRTNTILSVSYLFQVFKNLP	1	Ind		1	353	1	362	1	366	1	XC-contig_75	0.11	Unknown product	uk				conserved Plasmodium protein, unknown function	12	gi|296005596	33.5	60	2170	40	3	36	8	1860	54	1	3	N	1.667
cf-contig_533	1	Unknown product	1	Contig-533	Contig533	60.6	.	79.2	178	N	1	P2-1190459_020_G04	178	197	159	PGLYNGSCNYLNFYEQCVPCNFFLLYNLNFYFHYFYNCTLVIVNIMLHCSNFF	1	Ind		1	436	1	446	1	451	1	XC-contig_57	0.0006	Unknown product	uk				conserved Plasmodium protein, unknown function	1.9	gi|296004474	36.2	35	1339	41	3	21	0	410	11	1	-2	N
cf-contig_730	1	Unknown product	1	Contig-730	Contig730	62.4	.	74.8	207	N	1	P10-1189194_003_G01	207	226	147	RKLLHLMMMMTLMSAEFQYRFIYVFINTYLYYIKIKLLHSYCNDKKKKK	3	Cyt		1	59	2	52	2	49	2	XC-contig_175	0.051	Unknown product	uk				conserved Plasmodium protein, unknown function	4.3	gi|296005263	35	58	854	32	7	40	2	524	8	1	2	N	1.724
cf-contig_782	1	Unknown product	1	Contig-782	Contig782	38.2	.	70.9	146	N	1	P13-1189480_085_F11	146	165	75	APGGKERKKEHIKGDNGGGHGNKKK	2	Ind		1	627	1	648	1	664	1	XC-contig_176	0.004	Unknown product	uk				conserved Plasmodium protein, unknown function	21	gi|124513538	32.7	35	618	44	6	20	0	372	17	1	2	N	2.857
cf-contig_620	1	Unknown product	1	Contig-620	Contig620	55.9	0.1	67.7	660	N	1	P6-1188873_026_D04	660	679	138	YDLEAYGIYCFEFSESIQNYGLKRGRKMFHFSAIYKETAWPIVAQN	3	Ind		1	506	1	518	1	528	1	XC-contig_112	0.001	Unknown product	uk				seryl-tRNA synthetase, putative	2.5	gi|124805876	37	40	618	39	7	26	0	303	73	1	-2	N
cf-contig_539	1	Unknown product	1	Contig-539	Contig539	60.5	.	76.9	124	N	1	P2-1190475_050_H08	124	143	69	NCFDCKSIYIGKINCIGYYLNFY	2	Ind		1	441	1	451	1	457	1	XC-contig_216	0.16	Unknown product	uk				tubulin-tyrosine ligase, putative	27	gi|124804913	32.3	26	2755	48	1	14	0	811	36	1	-1	N
cf-contig_87	5	Unknown product	5	Contig-87	Contig87	89.6	.	74.1	141	N	5	P1-1152486_095_A11	173	166	120	RGRTGETGFGNNIFLKYKNLCIFNMKSLYIGDFFPFWDLQ	3	Ind		5	9	4	15	3	105	1	XC-contig_115	0.55	Unknown product	uk				hypothetical protein in Plasmodium species	21	gi|221053702	32.7	51	2206	34	2	36	0	987	1	1	-2	N	1.961
cf-contig_36	1	Unknown product	1	Contig-36	Contig36	62.5	.	72.4	231	N	1	P6-1188915_068_G10	231	250	114	RPGHRALRQIAGTSRTVTKCSRNTECFQIDYYKYCNIV	1	Ind		1	1	14	2	9	2	7	XC-contig_122	0.037	Unknown product	uk				reticulocyte binding-like protein 4	7.1	gi|37725926	34.3	49	1665	34	3	34	0	1075	59	1	-1	N	2.041
cf-contig_468	1	Unknown product	1	Contig-468	Contig468	59.6	.	77	277	N	1	P18-1190115_050_H08	277	296	84	KVLKLYFLLATNIIIHNFLKLSKTVTFL	3	Ind		1	380	1	389	1	394	1	XC-contig_184	0.14	Unknown product	uk				hypothetical protein	28	gi|156102753	32.3	64	2416	28	3	48	7	740	26	1	-2	N	1.563
cf-contig_770	1	Unknown product	1	Contig-770	Contig770	50.1	.	65.8	139	N	1	P13-1189436_027_C03	139	158	126	GRGDRAITAGEHRNDGISLRHIFKRKQNTLISYLSLFINQIN	3	Ind		1	617	1	638	1	654	1	XC-contig_160	0.14	Unknown product	uk				glutamyl-tRNA synthetase	62	gi|81177593	31.2	23	560	50	4	12	0	475	33	1	3	N
cf-contig_418	1	Unknown product	1	Contig-418	Contig418	48.2	2.1	65.1	127	N	1	P16-1189895_022_F04	127	146	63	DRIFCTINNVIIHVEIIEVYK	3	Ind		1	340	1	349	1	352	1	XC-contig_124	0.31	Unknown product	uk				hypothetical protein	16	gi|83282711	33.1	28	272	41	11	17	0	191	36	1	-1	N
cf-contig_659	1	Unknown product	1	Contig-659	Contig659	58.5	0.4	69.8	226	N	1	P8-1189062_009_D01	226	245	159	GGLGXSALRPGDRRCPVPMSAIFNIIYLIFNIYRLPKNNNYCFLNYSFTPKRI	1	Ind		1	538	1	550	1	562	1	XC-contig_179	0.39	Unknown product	uk				hypothetical protein	36	gi|82704824	32	36	856	37	4	23	0	753	67	1	1	N	2.778
cf-contig_540	1	Unknown product	1	Contig-540	Contig540	58.7	.	61.7	130	N	1	P3-1188546_015_A01	130	149	93	ARKQPPGLAVNDKWCWRLFLMYYMKNKFVKC	3	Ind		1	442	1	452	1	458	1	XC-contig_210	0.33	Unknown product	uk				60S ribosomal protein L24 gi|49532910|dbj|BAD26690.1| Ribosomal protein L24	0.060	gi|52783249	41.2	20	155	90	14	2	0	135	8	1	2	N
cf-contig_349	1	Unknown product	1	Contig-349	Contig349	51.6	.	66.3	180	N	1	P1-1152564_033_H05	180	199	126	RGIGHLRPGAGGTSQEINPDDRDCPLDRVHLGLYYIYMLTYM	3	Ind		1	281	1	287	1	287	1	XC-contig_190	0.006	Unknown product	uk				beta-C protein	28	gi|1478098	32.3	45	162	43	28	26	3	63	25	1	-2	N	2.222
cf-contig_53	2	Unknown product	2	Contig-53	Contig53	79.8	.	78.5	208	N	2	P14-1189555_008_E02	208	233	138	GIHQSYLIRTKNHKIKESKGHNQKKVLRFQDFVIKLRLVKKFSNLI	3	Ind		2	30	2	98	1	93	1	XC-contig_251	0.36	Unknown product	uk				hypothetical protein PPL_05793	36	gi|281207615	32	51	184	38	28	32	4	98	41	1	-2	N	3.922
cf-contig_452	1	Unknown product	1	Contig-452	Contig452	63.1	.	64.3	244	N	1	P18-1190045_078_B10	244	263	123	VNKFVAGSPSTSDSHVICNMRHMQRMFLILNSSERTHRHSR	2	Ind		1	366	1	375	1	380	1	XC-contig_106	0.6	Unknown product	uk				predicted protein	5.6	gi|224122556	34.7	36	512	37	7	23	0	41	130	1	-3	N
cf-contig_715	1	Unknown product	1	Contig-715	Contig715	65.3	.	69.2	312	N	1	P10-1189144_093_B11	312	331	108	PGSCKVSALKDMTKPIVAPKQQPVEDPADDFDIDAI	3	Ind		1	63	2	56	2	53	2	XC-contig_213	0.002	Unknown product	uk				alginate biosynthesis protein AlgI	1.9	gi|281420506	36.2	43	497	40	9	26	8	333	76	1	-2	N
cf-contig_661	1	Unknown product	1	Contig-661	Contig661	61.8	.	84.5	168	N	1	P8-1189064_025_D03	168	187	93	YTKEYFSKFCEYILTNFCKINVIFQEKKKKK	2	Ind		1	540	1	552	1	564	1	XC-contig_48	0.1	Unknown product	uk				hypothetical protein HMPREF0666_02014	62	gi|345884431	31.2	17	70	70	26	6	0	44	44	1	-1	N	5.882
cf-contig_361	1	Unknown product	1	Contig-361	Contig361	63.	.	74.7	293	N	1	P14-1189538_075_C09	293	312	186	DCFFCFLYIFKIFTFITMSPKKKVMCLELKREIIEKYEEHTIDMFKQNFRQIMNGQEKTINK	2	Cyt		1	290	1	297	1	298	1	XC-contig_190	0.012	Unknown product	uk				putative phosphonate ABC transporter	1.9	gi|78779056	36.2	38	500	45	8	22	0	251	128	1	-3	N
cf-contig_488	1	Unknown product	1	Contig-488	Contig488	43.5	.	64.8	796	N	1	P19-1190196_035_G05	796	815	195	GAGGSGHYGRGQRLKKKKKKYMIKKKKEKMIGGGPPPPIPYNVKYVLGGAPYYPHLGPSPIMGSN	1	Cyt		1	81	2	73	2	67	2	XC-contig_25	2e-06	Unknown product	uk				hypothetical protein	3E-007	gi|342906132	60.5	95	98	38	98	59	11	1	31	1	1	N	1.053
cf-contig_466	1	Unknown product	1	Contig-466	Contig466	35.7	.	71.9	120	N	1	P18-1190112_033_H05	120	139	84	LRQKIDIEMIFFFLNNSKVFSFHNIIRS	2	Ind		1	378	1	387	1	392	1	XC-contig_135	0.045	Unknown product	uk				thioredoxin reductase	79	gi|157827075	30.8	36	332	35	11	24	0	118	2	1	2	N	2.778
cf-contig_93	1	Unknown product	1	Contig-93	Contig93	59.9	0.7	75.5	267	N	1	P7-1188948_061_B07	267	286	183	GSGNXXITAGVVELEHLVMDKFIYKQKNYIFSIFLIQTKTKTSFVSTVKKVFKYSKYFKNI	3	Cyt		1	37	2	30	2	28	2	XC-contig_57	0.19	Unknown product	uk				hypothetical protein RC0976	3.2	gi|15892899	35.4	45	107	30	43	32	0	3	117	1	-3	N	2.222
cf-contig_446	1	Unknown product	1	Contig-446	Contig446	65.	.	70.9	256	N	1	P17-1190015_018_H04	256	275	129	KKRTEKKHPNIKYNVHHQVHHIIVYMTTSQAQNSCTRLKVILI	1	Ind		1	361	1	370	1	375	1	XC-contig_104	0.18	Unknown product	uk				YJL049W-like protein	7.2	gi|256271010	34.3	37	450	36	8	24	0	177	138	1	3	N	2.703
cf-contig_752	1	Unknown product	1	Contig-752	Contig752	60.3	0.4	68.6	433	N	1	P11-1189277_088_E12	433	452	183	GAGESXHYGRGLDPATTCKTGLDTTTRCKKRTGLDVITGCKKMDEWTIPGVELLSCHNYKI	2	Ind		1	605	1	625	1	639	1	XC-contig_220	0.25	Unknown product	uk				hypothetical protein	0.23	gi|291237017	39.3	312	321	52	98	19	0	8	1	17	-3	Y
cf-contig_44	1	Unknown product	1	Contig-44	Contig44	60.1	.	72.9	147	N	1	P9-1188515_038_F06	147	166	96	RGCMASLRQIAGTSHTVTKCSRNIKCFQIDYY	2	Ind		1	1	14	2	9	2	7	XC-contig_143	0.044	Unknown product	uk				peroxisomal trans-2-enoyl-CoA reductase-like	61	gi|291225235	31.2	30	304	41	10	18	0	196	3	1	-3	N	3.333
cf-contig_271	1	Unknown product	1	Contig-271	Contig271	65.7	.	68.9	164	N	1	CAFM_P2-040_E06	164	183	129	LSFSFIFAGRSSKNYSLRVLGFKHTARHIVERQRIWVIVHSSK	3	Ind		1	215	1	220	1	219	1	XC-contig_152	1.2	Unknown product	uk				sec1 family domain containing 2-like	82	gi|291233721	30.8	25	730	50	4	13	0	374	31	1	-1	N	4
cf-contig_600	1	Unknown product	1	Contig-600	Contig600	59.8	0.3	64.3	583	N	1	P5-1188782_073_D09	583	602	177	SITGKIEVVISRCRKQSAVNLLLHPQCICLCLPEQNEVLCDLIDFYKKIEVVSRSWGTA	2	Cyt		1	487	1	499	1	509	1	XC-contig_236	1.7	Unknown product	uk				alpha/beta fold family hydrolase	7.0	gi|335419597	35	35	277	41	13	21	0	68	266	1	-2	N	2.857
cf-contig_675	1	Unknown product	1	Contig-675	Contig675	39.3	.	72.6	536	N	1	P8-1189112_017_H03	536	555	180	KKKKQIQYYLTLLKCFFLTMCVWVVLTGHHSNNIGTFIYLCAPHVQHIYIGNINVYHKSG	1	Cyt		1	92	2	85	2	76	2	XC-contig_16	0.17	Unknown product	uk				Glucose-repressible alcohol dehydrogenase transcriptional effector (Cytoplasmic	5.6	gi|150864008	35	40	369	36	11	26	1	16	332	1	-3	N	5
cf-contig_24	8	Unknown product	8	Contig-24	Contig24	88.2	.	71.2	244	N	8	P20-1190218_031_A03	270	264	99	PGSTVALTTGLEERVHNAGKPLSGGTGAFSPGK	1	Ind		8	6	4	6	4	11	3	XC-contig_99	0.004	Unknown product	uk				SJCHGC02650 protein	9.5	gi|76155301	33.9	35	161	37	22	25	0	48	122	1	-3	N	5.714
cf-contig_518	1	Unknown product	1	Contig-518	Contig518	63.1	.	71.5	641	N	1	P2-1190402_061_B07	641	660	279	KPLIEINSILLVKFMLYHAYASCIWSGKYDYNTRFYNLLNSHFRTSYAIKKTIISYKTCIISIIFFGFAQTLTKVTYYTKWTIKYNSLSRTVD	3	Cyt		1	423	1	432	1	437	1	XC-contig_129	0.11	Unknown product	uk				hypothetical protein	4.0	gi|256073275	36.2	95	452	23	21	73	1	32	87	1	3	N	3.158
cf-contig_158	1	Unknown product	1	Contig-158	Contig158	40.6	.	70.3	422	N	1	P5-1188807_070_F10	422	441	138	PGEIRGEPGHPKLNNKMTHMLMNTYMILPKHQNITHSMLITMNCDL	1	Ind		1	21	3	144	1	141	1	XC-contig_90	0.067	Unknown product	uk				otopetrin, putative	0.87	gi|350644163	37.4	49	853	36	6	32	0	248	31	1	1	N	2.041
cf-contig_305	1	Unknown product	1	Contig-305	Contig305	61.5	.	73.7	167	N	1	CAFL_P1-090_D12	167	186	114	QCCLTGSRFSFQILILNEIGNYNSITISFNKFVKNVSG	1	Ind		1	246	1	251	1	250	1	XC-contig_2	0.039	Unknown product	uk				DNA-directed RNA polymerase subunit beta	48	gi|338733407	31.6	34	1254	34	3	23	0	676	61	1	1	N	2.941
cf-contig_77	2	Unknown product	2	Contig-77	Contig77	69.4	.	70.7	353	N	2	P20-1190275_088_E12	376	372	171	TAGGFVKGAFLAVFVFLGFLINGSECTVSTMATQQLASQLHQNGKPSSGGTGAHSYG	1	Cyt		2	16	3	14	3	14	3	XC-contig_246	0.011	Unknown product	uk				NADH dehydrogenase subunit 4	1.1	gi|171473622	37	62	451	31	14	43	0	18	148	1	-1	N	1.613
cf-contig_28	4	Unknown product	4	Contig-28	Contig28	69.8	.	72.5	817	N	4	P8-1189086_005_F01	842	843	276	KFINNNLTNILKQAKLNLYELNSNHSKLLILVLNRLRTKLHVSTYSARMNVFFTFNSIKLITQIARTSRTVTKCLRNTECFQIVYYEYCNII	2	Cyt		4	101	1	93	1	86	1	XC-contig_209	0.015	Unknown product	uk				hypothetical protein SINV_11683	0.054	gi|322782200	43.1	66	1242	35	5	44	1	224	19	1	1	N	1.515
cf-contig_694	1	Unknown product	1	Contig-694	Contig694	59.8	.	74.9	431	N	1	P9-1188487_010_D02	431	450	129	NYYVIFQTVFCQLSYFSTSDMESTYIEKSLQYYYTIYYLYNIY	3	Ind		1	566	1	581	1	593	1	XC-contig_80	0.05	Unknown product	uk				ApbE family protein	2.5	gi|320526974	35.8	56	384	33	15	38	4	54	258	1	3	N	1.786
cf-contig_615	1	Unknown product	1	Contig-615	Contig615	54.1	.	75.9	276	N	1	P6-1188846_013_B01	276	295	129	FFYTLHMLSETLLLFISIFFFIFGFECSIVEIVLHGLMKIPFY	2	Ind		1	501	1	513	1	523	1	XC-contig_225	0.04	Unknown product	uk				hypothetical protein SORBIDRAFT_02g036255	9.5	gi|242045960	33.9	60	76	29	80	44	0	1	21	1	3	N	6.667
cf-contig_267	1	Unknown product	1	Contig-267	Contig267	34.7	2.8	60.2	89	N	1	CAFM_P2-025_D03	89	108	105	RGVSGHXTAGKMMEXLEWSCCQNNTIILYKKKKKK	2	Ind		1	60	2	53	2	216	1	XC-contig_181	0.16	Unknown product	uk				hypothetical protein SORBIDRAFT_04g028700	82	gi|242066070	30.8	23	446	45	5	13	0	38	3	1	-2	N
cf-contig_226	1	Unknown product	1	Contig-226	Contig226	64.8	.	57.4	357	N	1	P16-1189874_057_D07	357	376	192	CQISTWDYRSQYNSKWKSSFVDIAATSNHMQLLDVRANIKKYPTHKRMVNRWIASHEIKVVLSR	2	Ind		1	55	2	48	2	45	2	XC-contig_96	0.38	Unknown product	uk				oligoendopeptidase, pepF/M3 family	5.6	gi|325970638	34.7	28	581	44	5	16	0	323	45	1	3	N	3.571
cf-contig_136	1	Unknown product	1	Contig-136	Contig136	62.9	.	67.2	396	N	1	P19-1190156_009_D01	396	415	102	FKKHFICIDKMKNRYNFHEGRSSGFGDIEEKVKK	1	Ind		1	11	4	10	4	8	4	XC-contig_211	0.16	Unknown product	uk				hypothetical protein Sca_2302	9.3	gi|224477784	33.9	49	311	39	16	31	3	121	31	1	-2	N	2.041
cf-contig_640	1	Unknown product	1	Contig-640	Contig640	60.	.	80	146	N	1	P7-1188965_092_C12	146	165	63	PGNHSCIKYYLFLIFINFIIF	3	Ind		1	524	1	536	1	546	1	XC-contig_57	1	Unknown product	uk				CAAX amino protease family protein	80	gi|323463293	30.8	32	191	48	17	17	1	33	9	1	3	N	3.125
cf-contig_324	1	Unknown product	1	Contig-324	Contig324	33.9	0.5	72.2		N	1	P1-1152482_063_A07		205	156	IKEYLNNCYSILIICFINHIVFMVLKISLFWYILFILLYTNYKIKFVKEKKK	2	Ind		1	261	1	267	1	266	1	XC-contig_59	0.003	Unknown product	uk				hypothetical protein SSUR61_0248	4.2	gi|353534157	35	42	458	41	9	25	0	311	74	1	2	N
cf-contig_796	1	Unknown product	1	Contig-796	Contig796	58.4	.	74.3	152	N	1	P12-1189354_041_D05	152	171	135	GAEKRDKKEGKKAIRRKKLGKSEKEEKDEKPEIKKGRKNERQEKN	3	Ind		1	4	6	661	1	677	1	XC-contig_246	2e-08	Unknown product	uk				hypothetical protein SSAG_05199	6E-005	gi|254385692	51.2	43	97	55	45	20	0	54	6	1	-2	N	4.651
cf-contig_352	1	Unknown product	1	Contig-352	Contig352	61.4	.	72	156	N	1	P14-1189506_015_A01	156	175	168	GGLVLEQDWQSNSNDWFVVYRFLYLNICVNKVIFNFLYVHIKQRIINDGNCKKKKK	3	Ind		1	283	1	290	1	290	1	XC-contig_129	0.12	Unknown product	uk				similar to thyrotropin-releasing hormone receptor 1	47	gi|72013600	31.6	39	427	32	9	27	2	347	42	1	3	N
cf-contig_606	1	Unknown product	1	Contig-606	Contig606	65.4	.	72.9	324	N	1	P5-1188805_054_F08	324	343	108	CFLSVNKYLASILLNYKMYLSNKKYMLRKYWKKKKK	3	Ind		1	493	1	505	1	515	1	XC-contig_201	0.0003	Unknown product	uk				hypothetical protein SSO2325	5.6	gi|15899083	34.7	88	489	30	18	62	7	47	76	1	-2	N	1.136
cf-contig_799	1	Unknown product	1	Contig-799	Contig799	25.9	.	76.6	544	N	1	P12-1189364_023_E03	544	563	111	FVYVFCLHLMVAHVFIQLLLKVSFKIQVNILLNFIIF	1	Ind		1	642	1	664	1	680	1	XC-contig_209	0.12	Unknown product	uk				NADH dehydrogenase subunit 4	0.41	gi|288903296	38.9	92	409	26	23	75	0	7	232	1	1	N	3.261
cf-contig_710	1	Unknown product	1	Contig-710	Contig710	63.7	0.2	66.7	552	N	1	P10-1189126_047_A05	552	571	201	SSPLKFLSSIELRRKSIRSITKINYHFKVIFRGTIKRSEIKKRLKVPFIIWKDKLFVPKMEYLCEKK	2	Ind		1	577	1	593	1	606	1	XC-contig_150	0.019	Unknown product	uk				CG11851	0.72	gi|21356275	38.1	50	623	40	8	37	0	299	346	1	-2	N	4
cf-contig_465	1	Unknown product	1	Contig-465	Contig465	61.6	.	78.4	222	N	1	P18-1190105_068_G10	222	241	99	VHLVWNHFQKIGKISIKLNVKFCVLKFNKIFHT	1	Ind		1	67	2	59	2	56	2	XC-contig_52	0.15	Unknown product	uk				glutathione S-transferase	12	gi|110592101	33.5	31	223	50	14	16	1	153	6	1	-3	N
cf-contig_639	1	Unknown product	1	Contig-639	Contig639	62.9	.	66.5	766	N	1	P7-1188964_091_C11	766	785	156	AIQSCTIQTAFIGPSVRDTQSTISYNVLLTSTITCPERCKIQTFARICLPTT	2	Ind		1	523	1	535	1	545	1	XC-contig_229	0.25	Unknown product	uk				heme maturase	2.6	gi|114329881	37.4	39	514	41	8	24	0	331	518	1	2	N	10.256
cf-contig_577	1	Unknown product	1	Contig-577	Contig577	64.9	.	78.8	400	N	1	P4-1188700_087_E11	400	419	210	YFLSQNIEIELKPCLQIHKYPYSLELLNLRPNSFDYIYHLYIITFIIYIRHFNHVKIHLIKTCIIKSYMI	1	Ind		1	470	1	480	1	489	1	XC-contig_190	0.42	Unknown product	uk				Ymf75	0.38	gi|114329873	38.5	79	187	31	43	62	0	69	55	1	1	N	2.532
cf-contig_616	1	Unknown product	1	Contig-616	Contig616	58.3	.	73.6	618	N	1	P6-1188859_012_C02	618	637	171	ILKEKGCIVFSDRKAPGGRRQTTFDCKTFKINQLCILEILLNVTILYKMIKNKLILN	2	Ind		1	502	1	514	1	524	1	XC-contig_158	0.0007	Unknown product	uk				Calpain family cysteine protease containing protein	6.2	gi|118367407	35.4	83	2590	25	3	77	0	1462	281	1	2	N	4.819
cf-contig_417	1	Unknown product	1	Contig-417	Contig417	60.5	.	70.3	244	N	1	P16-1189893_006_F02	244	263	66	MEPPWALVNETISGLMNSTTGA	2	Ind		1	74	2	66	2	61	2	XC-contig_5	0.32	Unknown product	uk				DNA polymerase family B containing protein	36	gi|118369112	32	44	1907	33	2	30	3	1251	93	1	-1	N	2.273
cf-contig_650	1	Unknown product	1	Contig-650	Contig650	56.	0.4	75.8	208	N	1	P7-1189013_084_G12	208	227	81	NQLIIGIKIIYQYVRLTYVCQNIEFKY	2	Ind		1	532	1	544	1	555	1	XC-contig_229	0.48	Unknown product	uk				hypothetical protein TTHERM_00834950	12	gi|118397855	33.5	35	150	38	24	22	0	20	65	1	2	N	2.857
cf-contig_34	1	Unknown product	1	Contig-34	Contig34	59.	.	71.4	875	N	1	P2-1190384_015_A01	875	894	165	MLNMNNTTLRFLTHTYTHVCIYVYKFSSTILREMKSFNYNNSKNISLLLTEGSIG	3	Cyt		1	103	1	95	1	88	1	XC-contig_169	0.39	Unknown product	uk				hypothetical protein TTHERM_01424460	0.13	gi|229595439	42	77	433	28	18	43	0	226	75	2	-2	N	3.896
cf-contig_690	1	Unknown product	1	Contig-690	Contig690	66.3	.	69.3	627	N	1	P9-1188477_028_C04	627	646	642	GRGAPENNQINPHLYPQMTPPYPDPLGLPEHNQIYPYQNPHLGYQNYLDDFQNQLPFNSYAPQFPYYQDPYTYYQNPFSFYQNPYQNDFLSQYHPRNFYNSQTTRWQKFKNFMQKPINSLKHHFNNLSDKVKNWFKLNNNDQVDKVEDKSLTLKDFANPEIVQRFLENLSQVLSNIKPMVYDRSEVVNYAKKTLDAIVDSISKYIMHKEKKKKK	2	Cyt		1	562	1	577	1	589	1	XC-contig_52	0.52	Unknown product	uk				IBR domain containing protein	7E-005	gi|118388248	52	108	920	36	12	71	1	788	110	1	2	N
cf-contig_794	1	Unknown product	1	Contig-794	Contig794	30.8	.	70.1	128	N	1	P12-1189350_009_D01	128	147	72	GGFWAGTGEDAAEGASYYKSLRNG	2	Ind		1	638	1	659	1	675	1	XC-contig_27	0.088	Unknown product	uk				unnamed protein product	63	gi|47184165	31.2	38	90	39	43	25	5	24	12	1	-2	N
cf-contig_769	1	Unknown product	1	Contig-769	Contig769	60.7	.	68.9	341	N	1	P13-1189425_030_B04	341	360	162	TFYVVCLYSISFCSTVNLTAFFFSALQFRIPRKILFWSLLIDAISIYLFIKLIN	1	Ind		1	616	1	637	1	653	1	XC-contig_55	0.19	Unknown product	uk				clathrin heavy chain	0.38	gi|85000911	38.5	81	2068	25	4	63	0	1860	87	1	-2	N	2.469
cf-contig_176	4	Unknown product	4	Contig-176	Contig176	76.5	.	73.8	480	N	4	P14-1189519_014_B02	483	500	126	NSCEVQQVEYCFFNWVIWTLEYSKILYLHRESKMLKFIQYVE	3	Ind		4	155	1	157	1	155	1	XC-contig_74	0.11	Unknown product	uk				hypothetical protein	1.9	gi|71034159	36.2	82	840	29	10	62	0	325	3	1	3	N	6.098
cf-contig_534	1	Unknown product	1	Contig-534	Contig534	62.9	.	79.3	396	N	1	P2-1190464_067_G09	396	415	123	IWNISTTVINLKSSKIVYSIRNILNIILLNFYILIYCNLSL	1	Ind		1	437	1	447	1	452	1	XC-contig_241	0.22	Unknown product	uk				hypothetical protein	9.4	gi|71032547	33.9	65	509	30	13	46	0	329	195	1	-3	N	4.615
cf-contig_692	1	Unknown product	1	Contig-692	Contig692	63.7	.	71.9	262	N	1	P9-1188485_092_C12	262	281	96	ANLQLIETIYLIYDFIQINYYAVFEIIPYHSF	1	Ind		1	564	1	579	1	591	1	XC-contig_64	0.14	Unknown product	uk				hypothetical protein	60	gi|71033625	31.2	29	1342	46	2	16	0	77	95	1	-2	N	3.448
cf-contig_772	1	Unknown product	1	Contig-772	Contig772	64.3	.	62.8	449	N	1	P13-1189444_091_C11	449	468	165	FQVKMAFRGQSCSGNTPLGSKEVLRWYRFEIQKGSRICISIQQKNVKALTSCNHD	2	Cyt		1	619	1	640	1	656	1	XC-contig_246	0.006	Unknown product	uk				adenylosuccinate synthetase	1.1	gi|150020216	37	64	399	28	16	47	0	125	63	1	3	N	3.125
cf-contig_133	1	Unknown product	1	Contig-133	Contig133	64.8	.	65.9	398	N	1	P3-1188552_063_A07	398	417	198	EEQEEQGVCTVRFYGRVKIHCLQNITPTLQDNFCRDDCMKLNRPGGKCDQANQRCACNYHSDFFAN	3	Ind		1	19	3	35	2	33	2	XC-contig_119	0.31	Unknown product	uk				hypothetical protein THITE_2129271	0.65	gi|347000952	37.7	31	145	43	22	18	0	114	207	1	3	N
cf-contig_800	1	Unknown product	1	Contig-800	Contig800	57.7	.	69.1	272	N	1	P12-1189365_024_E04	272	291	189	GGWGIGITAGRKLKINLYPQGPYVHNSPDLHPIKAQHLWKIYEYYEALVSFIAKYLELLNKLF	1	Ind		1	643	1	665	1	681	1	XC-contig_151	0.075	Unknown product	uk				hypothetical protein Thi970DRAFT_1500	16	gi|350574085	33.1	39	88	41	45	25	0	43	37	1	1	N
cf-contig_229	2	Unknown product	2	Contig-229	Contig229	76.7	.	82.2	281	N	2	P7-1188998_069_F09	283	303	159	AGGGLVKWFWIKYFLSMIIILLLLLSSFIYIFLIINSELIYSKITHEKNGFYI	1	Ind		2	56	2	49	2	46	2	XC-contig_60	0.03	Unknown product	uk				ribosomal protein S2	9.4	gi|11496554	33.9	71	233	29	31	51	5	143	48	1	-2	N	7.042
cf-contig_725	1	Unknown product	1	Contig-725	Contig725	64.3	.	77.1	208	N	1	P10-1189177_056_E08	208	227	72	FGLRNREMDIMIIKYKLITKSIIL	2	Ind		1	588	1	604	1	617	1	XC-contig_127	0.071	Unknown product	uk				hypothetical protein TDE1873	4.3	gi|42527379	35	36	288	47	13	20	0	41	43	1	-3	N
cf-contig_86	2	Unknown product	2	Contig-86	Contig86	68.1	.	72.8	220	N	2	CAFM_P2-010_D02	220	239	111	GSYKLPMGGGTLEEQLAQNAKSKSDDFGGTGETGFGK	3	Ind		2	9	4	15	3	104	1	XC-contig_41	4e-05	Unknown product	uk				gustatory receptor 182	5.5	gi|270009340	34.7	41	377	37	11	28	0	235	28	1	-3	N
cf-contig_160	4	Unknown product	4	Contig-160	Contig160	90.1	0.3	73.7	315	N	4	P4-1188675_076_C10	324	334	240	EVQIIXRTQANEVSQKVSGKTKELVNSFKSKMSVIIDNVNEKFSKMKERIQNYIKNAENKLKELFQQFSSQLRRTSERSQ	3	Cyt		4	22	3	19	3	18	3	XC-contig_245	0.089	Unknown product	uk				hypothetical protein	0.002	gi|189239953	45.8	81	388	30	21	57	0	158	3	1	3	N	1.235
cf-contig_57	9	Unknown product	9	Contig-57	Contig57	92.1	.	70.1	349	N	9	P15-1189823_018_H04	359	378	261	NFAKTGDPLKSWISEKKRPKPPYGDISEITWNPFNIKDPKYLDMANEGFNMKNFEEQQRMEPWNELHAEYHRYILDLEEKRKLKEKK	1	Cyt		9	31	2	25	2	23	2	XC-contig_136	0.001	Unknown product	uk				hypothetical protein TcasGA2_TC014687	0.50	gi|270007941	38.1	53	552	39	10	40	1	491	4	1	1	N
cf-contig_407	1	Unknown product	1	Contig-407	Contig407	34.8	1.1	65.4	163	N	1	P16-1189840_079_A09	163	182	177	RGNPAXYGRARXKEKKNARKERNKRKREGGKKEKTGKEKVITKKEEEKKKKKVEKKKKK	3	Ind		1	333	1	341	1	342	1	XC-contig_246	1e-05	Unknown product	uk				predicted protein	3E-005	gi|340517072	52.4	80	95	44	85	28	0	0	0	51	1	Y
cf-contig_448	1	Unknown product	1	Contig-448	Contig448	62.9	.	77.9	230	N	1	P18-1190037_014_B02	230	249	138	RGGNTMRSFNDIEEERYQLWKNLFEIGKEFKKRTKEQLEKQCLQKE	2	Cyt		1	363	1	372	1	377	1	XC-contig_62	0.001	Unknown product	uk				hypothetical protein	0.64	gi|123413828	37.7	51	207	38	25	32	3	114	64	1	-1	N
cf-contig_467	1	Unknown product	1	Contig-467	Contig467	56.5	0.8	73.5	230	N	1	P18-1190114_049_H07	230	249	144	FSMFIVILRLIINRISWYIFKYEILNKLPKYFDEYNKSLIKSKKKKKK	2	Cyt		1	379	1	388	1	393	1	XC-contig_159	0.11	Unknown product	uk				hypothetical protein	7.2	gi|123471170	34.3	72	511	23	14	56	10	325	38	1	2	N	1.389
cf-contig_719	1	Unknown product	1	Contig-719	Contig719	62.2	.	66.9	229	N	1	P10-1189161_026_D04	229	248	75	IAICFQVKIALARHCCTNKMSALLD	2	Ind		1	583	1	599	1	612	1	XC-contig_9	0.017	Unknown product	uk				hypothetical protein TRV_01110	61	gi|302666203	31.2	29	576	43	5	17	0	137	42	1	3	N	6.897
cf-contig_411	1	Unknown product	1	Contig-411	Contig411	27.7	0.9	58.6	97	N	1	P16-1189860_043_C05	97	116	114	GGWGIGPLRPGKSRTKSLGFSYLVRYHWLFXLKKKKKK	1	Ind		1	5	5	5	5	346	1	XC-contig_193	0.98	Unknown product	uk				hypothetical protein TRIADDRAFT_31455	5.6	gi|196013946	34.7	28	531	44	5	16	0	476	4	1	1	N
cf-contig_23	17	Unknown product	17	Contig-23	Contig23	88.4	.	72.2	326	N	17	P6-1188888_055_E07	292	352	180	YGRAGFIKCVFLVIFVFLGFLTNGNHCQLSTVALTTGLEERVHNAGKPLSGGTGAFSPGK	2	Ind		17	6	4	6	4	11	3	XC-contig_41	0.002	Unknown product	uk				hypothetical protein, unlikely	9.5	gi|261331335	33.9	63	134	31	48	44	9	47	188	1	-1	N	3.175
cf-contig_367	1	Unknown product	1	Contig-367	Contig367	57.4	.	74	388	N	1	P14-1189573_054_F08	388	407	141	KLLFHSEIILKNTLIFITFDLILLKFICLLRYIYIYFVIYKYNMKID	2	Ind		1	296	1	303	1	304	1	XC-contig_86	0.017	Unknown product	uk				hypothetical protein, unlikely	2.5	gi|261329802	35.8	78	117	33	68	60	1	34	92	1	2	N	3.846
cf-contig_88	2	Unknown product	2	Contig-88	Contig88	85.3	.	79.7	371	N	2	P8-1189116_049_H07	371	390	93	AGLAESMPKMQKIKVLILEELVNMDLENNIF	1	Ind		2	114	1	109	1	106	1	XC-contig_41	6e-06	Unknown product	uk				hypothetical protein, unlikely	0.65	gi|343474219	37.7	55	140	35	40	36	6	18	32	1	-3	N
cf-contig_554	1	Unknown product	1	Contig-554	Contig554	58.8	.	77.1	151	N	1	P3-1188607_006_F02	151	170	117	TTYTYIIYKYICIYFIILTLYNSGNKDLLKFTKKKKKKK	1	Ind		1	451	1	461	1	468	1	XC-contig_207	0.046	Unknown product	uk				hypothetical protein, conserved in T. vivax	61	gi|343413461	31.2	38	544	38	7	24	3	37	28	1	-3	N	2.632
cf-contig_424	1	Unknown product	1	Contig-424	Contig424	67.5	.	59.2	155	N	1	P16-1189922_049_H07	155	174	159	RFYILATLPITGNPNSSKCGFVPANLDDSKVPRRFCVRLLTNVCEHSKKKKKK	2	Ind		1	75	2	67	2	62	2	XC-contig_106	1.1	Unknown product	uk				hypothetical protein	16	gi|296424756	33.1	28	709	58	4	12	0	275	34	1	1	N
cf-contig_714	1	Unknown product	1	Contig-714	Contig714	63.2	.	56.2	159	N	1	P10-1189137_030_B04	159	178	156	RFYILATLPITGNPNSSKCGFVPANLDDSKVPRRFCVRLLTNVCEHEKKKKK	2	Ind		1	75	2	67	2	62	2	XC-contig_106	1.1	Unknown product	uk				hypothetical protein	16	gi|296424756	33.1	28	709	58	4	12	0	275	40	1	1	N
cf-contig_132	1	Unknown product	1	Contig-132	Contig132	52.3	0.9	64.7	199	N	1	P1-1152566_049_H07	199	218	111	PGGIGHYXAGELNRPGGKCDQANQRCACNYHSDFFVN	1	Ind		1	19	3	132	1	129	1	XC-contig_150	0.19	Unknown product	uk				DNA internalization-related competence protein ComEC/Rec2	5.5	gi|294793761	34.7	39	742	37	5	25	0	536	55	1	-3	N
cf-contig_390	1	Unknown product	1	Contig-390	Contig390	61.1	.	66.7	170	N	1	P15-1189780_073_D09	170	189	111	MIKVQIYSIFLWVSYQDLLCANDRLATRRLCALIFRL	3	Ind		1	318	1	326	1	327	1	XC-contig_174	0.2	Unknown product	uk				DNA topoisomerase III	7.3	gi|343508709	34.3	29	749	50	4	15	0	113	46	1	-1	N
cf-contig_328	1	Unknown product	1	Contig-328	Contig328	35.1	0.8	59.5	107	N	1	P1-1152492_045_B05	107	126	75	SXQSLMLKFCKLMEINDKTEKKKKK	1	Ind		1	265	1	271	1	270	1	XC-contig_55	0.86	Unknown product	uk				hypothetical protein WIV_gp005	80	gi|339905991	30.8	30	515	45	6	17	0	416	4	1	-1	N
cf-contig_216	3	Unknown product	3	Contig-216	Contig216	85.6	.	73.6	216	N	3	P7-1188975_074_D10	239	235	108	YGRGGKDDDGPVVRLFKGDEGRNDMEPIPENFEDLD	1	Ind		3	24	3	177	1	175	1	XC-contig_43	0.015	Unknown product	uk				diguanylate cyclase/phosphodiesterase	12	gi|335932233	33.5	45	683	31	7	32	0	180	26	1	-1	N	2.222
[truncated: 91 more columns]

## Sheet: Sheet1
Name	Class	Subclass	Comments
402	Enzymes	Phosphatase	Xc-contig_7 is phosphatase
421	Enzymes	Phosphatase	Xc-contig_7 is phosphatase
423	Enzymes	Phosphatase	Xc-contig_7 is phosphatase
358	Enzymes	Phosphatase	secreted salivary phosphatase
766	Enzymes	Phosphatase	secreted acid phosphatase
393	Enzymes	Phosphatase	secreted salivary protein
510	Enzymes	Phosphatase	secreted salivary protein
47	Enzymes	Phosphatase	truncated secreted salivary acid phosphatase
48	Enzymes	Phosphatase	truncated secreted salivary acid phosphatase
49	Enzymes	Phosphatase	truncated secreted salivary acid phosphatase
123	Enzymes	Phosphatase	Lysosomal & prostatic acid phosphatases
148	Enzymes	Phosphatase	Lysosomal & prostatic acid phosphatases
79	Enzymes	Phosphatase	truncated secreted salivary acid phosphatase
261	Enzymes	Phosphatase	truncated secreted salivary acid phosphatase
220	Enzymes	Phosphatase	Lysosomal & prostatic acid phosphatases
246	Enzymes	Phosphatase	Lysosomal & prostatic acid phosphatases - Membrane anchor detected
370	Enzymes	Phosphatase	Lysosomal & prostatic acid phosphatases
609	Enzymes	Phosphatase	secreted acid phosphatase
50	Enzymes	Phosphatase	truncated salivary phosphatase
80	Enzymes	Apyrase	salivary apyrase
81	Enzymes	Apyrase	salivary apyrase
653	Enzymes	Apyrase	salivary apyrase
791	Enzymes	5'-nucleotidase	5'-nucleotidase
806	Enzymes	5'-nucleotidase	5'-nucleotidase
60	Enzymes	Adenosine deaminase	Adenine deaminase/adenosine deaminase
61	Enzymes	Adenosine deaminase	Adenine deaminase/adenosine deaminase
59	Enzymes	Adenosine deaminase	Adenosine deaminase CECR1 - metal ion binding - inosine biosynthetic process - proteoglycan binding - hypoxanthine salvage - protein homodimerization
62	Enzymes	Adenosine deaminase	Adenosine deaminase CECR1 - metal ion binding - proteoglycan binding - adenosine receptor binding - hydrolase - purine ribonucleoside monophosphate - signalP detected
100	Enzymes	Adenosine deaminase	truncated esterase
781	Enzymes	Esterase	truncated esterase
56	Enzymes	Esterase	truncated esterase
51	Antigen 5 family		salivary allergen 2
52	Antigen 5 family		salivary allergen 2
54	Antigen 5 family		salivary allergen 2
208	Immunity related	Attacin	Attacin
726	Immunity related	Defensins	Defensin-1 - signalP detected
537	Immunity related	Defensins	Knottins
188	Immunity related	Defensins	Knottins
189	Immunity related	Defensins	Knottins
190	Immunity related	Defensins	Knottins
29	Flea -specific families	FS-H family	Unknown product
37	Flea -specific families	FS-H family	secreted salivary protein
31	Flea -specific families	FS-H family	secreted salivary protein
39	Flea -specific families	FS-H family	secreted salivary protein
40	Flea -specific families	FS-H family	secreted salivary protein
41	Flea -specific families	FS-H family	secreted salivary protein
38	Flea -specific families	FS-H family	Unknown product
66	Flea -specific families	FS-H family	Unknown product
69	Flea -specific families	FS-H family	Unknown product
70	Flea -specific families	FS-H family	Unknown product
71	Flea -specific families	FS-H family	Unknown product
63	Flea -specific families	FS-H family	Unknown product
64	Flea -specific families	FS-H family	Unknown product
67	Flea -specific families	FS-H family	secreted salivary protein
94	Flea -specific families	FS-H family	secreted salivary protein
95	Flea -specific families	FS-H family	secreted salivary protein
65	Flea -specific families	FS-H family	secreted salivary protein - signalP detected
68	Flea -specific families	FS-H family	Unknown product
724	Flea -specific families	FS-H family	secreted salivary protein
19	Flea -specific families	Short peptide family	secreted salivary protein
12	Flea -specific families	Short peptide family	secreted salivary protein - signalP detected
13	Flea -specific families	Short peptide family	secreted salivary protein - signalP detected
14	Flea -specific families	Short peptide family	secreted salivary protein - signalP detected
16	Flea -specific families	Short peptide family	Unknown product
17	Flea -specific families	Short peptide family	secreted salivary protein - signalP detected
15	Flea -specific families	Short peptide family	Unknown product
673	Flea -specific families	Short peptide family	Unknown product
1	Flea -specific families	Abundant very short peptide family	Hypothetical secreted protein precursor - signalP detected
2	Flea -specific families	Abundant very short peptide family	Hypothetical secreted protein precursor - signalP detected
5	Flea -specific families	Abundant very short peptide family	Hypothetical secreted protein precursor - signalP detected
6	Flea -specific families	Abundant very short peptide family	Hypothetical secreted protein precursor - signalP detected
7	Flea -specific families	Abundant very short peptide family	Hypothetical secreted protein precursor - signalP detected
10	Flea -specific families	Abundant very short peptide family	Hypothetical secreted protein precursor - signalP detected
25	Flea -specific families	Abundant very short peptide family	Hypothetical secreted protein precursor - signalP detected
169	Flea -specific families	FS-I antigen	Salivary antigen 1
303	Flea -specific families	Deorphanized flea proteins	Hypothetical secreted protein precursor - signalP detected
437	Flea -specific families	Deorphanized flea proteins	Unknown product
75	Flea -specific families	Deorphanized flea proteins	secreted salivary protein
638	Flea -specific families	Deorphanized flea proteins	Unknown product
693	Flea -specific families	Deorphanized flea proteins	Unknown product
735	Flea -specific families	Deorphanized flea proteins	secreted salivary protein
55	Flea -specific families	Other putative secreted peptides	Unknown product
83	Flea -specific families	Other putative secreted peptides	Glycine-rich cell wall structural protein 1.8 - signalP detected
514	Flea -specific families	Other putative secreted peptides	Hypothetical secreted protein precursor - signalP detected
802	Flea -specific families	Other putative secreted peptides	Hypothetical secreted protein precursor - signalP detected
230	Flea -specific families	Other putative secreted peptides	Hypothetical secreted protein precursor - signalP detected
277	Flea -specific families	Other putative secreted peptides	Hypothetical secreted protein precursor - signalP detected
760	Flea -specific families	Other putative secreted peptides	Hypothetical secreted protein precursor - signalP detected
120	Flea -specific families	Other putative secreted peptides	Hypothetical secreted protein precursor - signalP detected
564	Flea -specific families	Other putative secreted peptides	Hypothetical secreted protein precursor - signalP detected
792	Flea -specific families	Other putative secreted peptides	Hypothetical secreted protein precursor - signalP detected
310	Putative Housekeeping proteins	Cytoskeletal	14-3-3zeta - protein heterodimerization - protein homodimerization - microtubule associated complex - protein folding - protein stabilization -
755	Putative Housekeeping proteins	Cytoskeletal	Actin
798	Putative Housekeeping proteins	Cytoskeletal	Actin regulatory (gelsolin/villin family)
607	Putative Housekeeping proteins	Cytoskeletal	Calmodulin - lateral inhibition - calmodulin binding - centriole replication - microtubule associated complex - kinetochore organization - positive
685	Putative Housekeeping proteins	Cytoskeletal	Calmodulin - lateral inhibition - calmodulin binding - centriole replication - microtubule associated complex - kinetochore organization - positive
750	Putative Housekeeping proteins	Cytoskeletal	Calmodulin - lateral inhibition - calmodulin binding - centriole replication - microtubule associated complex - kinetochore organization - positive
761	Putative Housekeeping proteins	Cytoskeletal	centromere/microtubule binding protein cbf5 Aedes aegypti
117	Putative Housekeeping proteins	Cytoskeletal	Elongation factor 1alpha48D - microtubule associated complex - lipid particle - GTP binding - translation - GTPase - cytoplasm
225	Putative Housekeeping proteins	Cytoskeletal	ERp60 - microtubule associated complex - lipid particle - protein disulfide oxidoreductase - electron carrier - cell redox homeostasis -
451	Putative Housekeeping proteins	Cytoskeletal	F-actin capping protein beta subunit
626	Putative Housekeeping proteins	Cytoskeletal	Microtubule-associated protein CRIPT
576	Putative Housekeeping proteins	Cytoskeletal	Receptor of activated protein kinase C 1 - catalytic step 2 spliceosome - nuclear mRNA splicing via spliceosome - precatalytic spliceosome -
288	Putative Housekeeping proteins	Cytoskeletal	Thioredoxin domain-containing protein 2 - nutrient reservoir - cell redox homeostasis - cell differentiation - protein disulfide oxidoreductase -
426	Putative Housekeeping proteins	Cytoskeletal	Uncharacterized protein - smooth muscle cell proliferation - plasma membrane - cytoplasm - nucleus
134	Putative Housekeeping proteins	Extracellular matrix	integrin beta-like 1 - integrin-mediated signaling pathway - binding - cell-matrix adhesion - receptor - integrin complex - cell adhesion - signalP detected
622	Putative Housekeeping proteins	Immunity related	Lin-9 homolog (mLin-9) (Type I interferon receptor beta chain-associated protein) (TUDOR gene similar 1 protein)
697	Putative Housekeeping proteins	Immunity related	GRIM-19 protein
242	Putative Housekeeping proteins	Immunity related	Polyubiquitin-B - toll-like receptor 21 signaling pathway - toll-like receptor 15 signaling pathway - activation of MAPK involved in innate immune
371	Putative Housekeeping proteins	Metabolism, amino acid	Glycine dehydrogenase (decarboxylating)
664	Putative Housekeeping proteins	Metabolism, amino acid	Homocysteine S-methyltransferase
623	Putative Housekeeping proteins	Metabolism, amino acid	Phosphoserine phosphatase
501	Putative Housekeeping proteins	Metabolism, amino acid	Spermidine synthase
378	Putative Housekeeping proteins	Metabolism, amino acid	Trypsin
524	Putative Housekeeping proteins	Metabolism, amino acid	Uncharacterized conserved protein with similarity to phosphopantothenoylcysteine synthetase/decarboxylase
455	Putative Housekeeping proteins	Metabolism, carbohydrate	6-phosphogluconolactonase - 6-phosphogluconolactonase - glucose metabolic process - carbohydrate metabolic process - cytoplasm
440	Putative Housekeeping proteins	Metabolism, carbohydrate	ATP citrate lyase - lipid particle - cellular carbohydrate metabolic process - succinate-CoA ligase (ADP-forming) - ATP binding - acetyl-CoA
222	Putative Housekeeping proteins	Metabolism, carbohydrate	Fructose-biphosphate aldolase
223	Putative Housekeeping proteins	Metabolism, carbohydrate	Fructose-biphosphate aldolase
449	Putative Housekeeping proteins	Metabolism, carbohydrate	glucosamine-6-phosphate deaminase 1 - cellular_component - carbohydrate metabolic process - N-acetylglucosamine metabolic process -
668	Putative Housekeeping proteins	Metabolism, carbohydrate	Glucosamine-6-phosphate isomerase
547	Putative Housekeeping proteins	Metabolism, carbohydrate	Ricin-type beta-trefoil
387	Putative Housekeeping proteins	Metabolism, energy	Cytochrome c oxidase subunit II
764	Putative Housekeeping proteins	Metabolism, energy	cytochrome c oxidase subunit Vb COX4
527	Putative Housekeeping proteins	Metabolism, energy	Cytochrome c1
490	Putative Housekeeping proteins	Metabolism, energy	Electron transfer flavoprotein beta subunit - signalP detected
520	Putative Housekeeping proteins	Metabolism, energy	F0F1-type ATP synthase beta subunit
459	Putative Housekeeping proteins	Metabolism, energy	Ferredoxin
744	Putative Housekeeping proteins	Metabolism, energy	Ferredoxin
754	Putative Housekeeping proteins	Metabolism, energy	Malate dehydrogenase
563	Putative Housekeeping proteins	Metabolism, energy	Mitochondrial F1F0-ATP synthase subunit epsilon/ATP15
666	Putative Housekeeping proteins	Metabolism, energy	Mitochondrial F1F0-ATP synthase subunit OSCP/ATP5
445	Putative Housekeeping proteins	Metabolism, energy	NADH dehydrogenase subunit 1
696	Putative Housekeeping proteins	Metabolism, energy	NADH dehydrogenase subunit 1
412	Putative Housekeeping proteins	Metabolism, energy	NADH-ubiquinone oxidoreductase chain 2 - reactive oxygen species metabolic process - respiratory chain - ATP synthesis coupled electron transport -
586	Putative Housekeeping proteins	Metabolism, energy	Ubiquinol-cytochrome C reductase hinge protein
538	Putative Housekeeping proteins	Metabolism, energy	Adoxophyes honmai mitochondrion complete genome
341	Putative Housekeeping proteins	Metabolism, intermediary	Monooxygenase involved in coenzyme Q (ubiquinone) biosynthesis
597	Putative Housekeeping proteins	Metabolism, lipid	2-enoyl-CoA hydratase/3-hydroxyacyl-CoA dehydrogenase/Peroxisomal 3-ketoacyl-CoA-thiolase sterol-binding domain
743	Putative Housekeeping proteins	Metabolism, lipid	hydroxysteroid dehydrogenase-like protein 2-like
727	Putative Housekeeping proteins	Metabolism, lipid	Fatty acid desaturase - signalP detected
413	Putative Housekeeping proteins	Metabolism, nucleotide	exosomal 3'-5' exoribonuclease complex subunit ski4
787	Putative Housekeeping proteins	Nuclear Regulation	DNA polymerase delta catalytic subunit
637	Putative Housekeeping proteins	Nuclear Regulation	SNF2 family DNA-dependent ATPase
718	Putative Housekeeping proteins	Protein Export	beta-coatomer protein - regulation of lipid storage - phagocytosis engulfment - intracellular protein transport - structural molecule - binding - - signalP detected
460	Putative Housekeeping proteins	Protein Export	emp24/gp25L/p24 family of membrane trafficking
364	Putative Housekeeping proteins	Protein Export	sec71 - binding - regulation of ARF protein signal transduction - ER to Golgi vesicle-mediated transport - ARF guanyl-nucleotide exchange factor -
580	Putative Housekeeping proteins	Protein Export	Translocon-associated protein
701	Putative Housekeeping proteins	Protein Export	Vacuolar protein sorting-associated protein 53 homolog - membrane - protein transport - endosome membrane - Golgi apparatus - endosome
508	Putative Housekeeping proteins	Protein Export	Vesicle coat protein clathrin light chain
439	Putative Housekeeping proteins	Protein Export	gamma-coatomer protein - larval salivary gland morphogenesis - endoplasmic reticulum - regulation of tube diameter open tracheal system -
601	Putative Housekeeping proteins	Protein modification	10 kDa heat shock protein mitochondrial-like
462	Putative Housekeeping proteins	Protein modification	20S proteasome regulatory subunit alpha type PSMA3/PRE10
157	Putative Housekeeping proteins	Protein modification	Calreticulin
728	Putative Housekeeping proteins	Protein modification	Cyclophilin type peptidyl-prolyl cis-trans isomerase
591	Putative Housekeeping proteins	Protein modification	DNA binding - protein folding - unfolded protein binding - regulation of transcription DNA-dependent - heat shock protein binding
298	Putative Housekeeping proteins	Protein modification	DNAJ chaperone Culex quinquefasciatus
556	Putative Housekeeping proteins	Protein modification	Glutaredoxin
669	Putative Housekeeping proteins	Protein modification	Hydrolytic enzymes of the alpha/beta hydrolase fold
516	Putative Housekeeping proteins	Protein modification	Oligosaccharyltransferase beta subunit
628	Putative Housekeeping proteins	Protein modification	Oligosaccharyltransferase STT3 subunit
775	Putative Housekeeping proteins	Protein modification	prolyl endopeptidase
584	Putative Housekeeping proteins	Protein modification	serine protease P153
89	Putative Housekeeping proteins	Proteasome machinery	E3 ubiquitin-protein ligase RBBP6
142	Putative Housekeeping proteins	Proteasome machinery	Predicted ubiquitin-protein ligase/hyperplastic discs protein HECT superfamily
536	Putative Housekeeping proteins	Proteasome machinery	proteasome (prosome macropain) 26S subunit non-ATPase 1 - proteasome complex - regulation of protein catabolic process - enzyme regulator -
785	Putative Housekeeping proteins	Proteasome machinery	Proteasome activator complex subunit 4 (Proteasome activator PA200)
251	Putative Housekeeping proteins	Proteasome machinery	proteasome subunit beta 1
346	Putative Housekeeping proteins	Proteasome machinery	ubiquitin protein ligase Glossina morsitans morsitans
422	Putative Housekeeping proteins	Proteasome machinery	ubiquitin-protein ligase 1 - ubiquitin-dependent protein catabolic process
90	Putative Housekeeping proteins	Proteasome machinery	Uncharacterized protein - metal ion binding - protein ubiquitination involved in ubiquitin-dependent protein catabolic process - zinc ion binding -
91	Putative Housekeeping proteins	Proteasome machinery	Uncharacterized protein - metal ion binding - protein ubiquitination involved in ubiquitin-dependent protein catabolic process - zinc ion binding -
178	Putative Housekeeping proteins	Protein synthesis machinery	40S ribosomal protein S13
179	Putative Housekeeping proteins	Protein synthesis machinery	40S ribosomal protein S13
200	Putative Housekeeping proteins	Protein synthesis machinery	40S ribosomal protein S14
406	Putative Housekeeping proteins	Protein synthesis machinery	40S ribosomal protein S15
801	Putative Housekeeping proteins	Protein synthesis machinery	40S ribosomal protein S15
130	Putative Housekeeping proteins	Protein synthesis machinery	40S ribosomal protein S15/S22
152	Putative Housekeeping proteins	Protein synthesis machinery	40S ribosomal protein S16
102	Putative Housekeeping proteins	Protein synthesis machinery	40S ribosomal protein S2
103	Putative Housekeeping proteins	Protein synthesis machinery	40S ribosomal protein S2
187	Putative Housekeeping proteins	Protein synthesis machinery	40S ribosomal protein S2/30S ribosomal protein S5
320	Putative Housekeeping proteins	Protein synthesis machinery	40S ribosomal protein S23
721	Putative Housekeeping proteins	Protein synthesis machinery	40S ribosomal protein S23
221	Putative Housekeeping proteins	Protein synthesis machinery	40S ribosomal protein S3
128	Putative Housekeeping proteins	Protein synthesis machinery	40S ribosomal protein S3A
194	Putative Housekeeping proteins	Protein synthesis machinery	40S ribosomal protein S4
97	Putative Housekeeping proteins	Protein synthesis machinery	40S ribosomal protein S6
170	Putative Housekeeping proteins	Protein synthesis machinery	40S ribosomal protein S7
171	Putative Housekeeping proteins	Protein synthesis machinery	40S ribosomal protein S7
172	Putative Housekeeping proteins	Protein synthesis machinery	40S ribosomal protein S7
104	Putative Housekeeping proteins	Protein synthesis machinery	40S ribosomal protein S8
105	Putative Housekeeping proteins	Protein synthesis machinery	40S ribosomal protein S8
106	Putative Housekeeping proteins	Protein synthesis machinery	40S ribosomal protein S8
249	Putative Housekeeping proteins	Protein synthesis machinery	40S ribosomal protein SA (P40)/Laminin receptor 1
113	Putative Housekeeping proteins	Protein synthesis machinery	60S acidic ribosomal protein P0-like
73	Putative Housekeeping proteins	Protein synthesis machinery	60S acidic ribosomal protein P1
74	Putative Housekeeping proteins	Protein synthesis machinery	60S acidic ribosomal protein P1
630	Putative Housekeeping proteins	Protein synthesis machinery	60S ribosomal export protein NMD3
203	Putative Housekeeping proteins	Protein synthesis machinery	60s ribosomal protein L10
232	Putative Housekeeping proteins	Protein synthesis machinery	60S ribosomal protein L10A
698	Putative Housekeeping proteins	Protein synthesis machinery	60S ribosomal protein L11
753	Putative Housekeeping proteins	Protein synthesis machinery	60S ribosomal protein L11
239	Putative Housekeeping proteins	Protein synthesis machinery	60S Ribosomal protein L13
231	Putative Housekeeping proteins	Protein synthesis machinery	60S ribosomal protein L13a-like
118	Putative Housekeeping proteins	Protein synthesis machinery	60s ribosomal protein L15
119	Putative Housekeeping proteins	Protein synthesis machinery	60s ribosomal protein L15
153	Putative Housekeeping proteins	Protein synthesis machinery	60S ribosomal protein L18a
121	Putative Housekeeping proteins	Protein synthesis machinery	60s ribosomal protein L19
108	Putative Housekeeping proteins	Protein synthesis machinery	60s ribosomal protein L2/L8
469	Putative Housekeeping proteins	Protein synthesis machinery	60S ribosomal protein L21
150	Putative Housekeeping proteins	Protein synthesis machinery	60S ribosomal protein L22
420	Putative Housekeeping proteins	Protein synthesis machinery	60S ribosomal protein L22-like
180	Putative Housekeeping proteins	Protein synthesis machinery	60S ribosomal protein L26
363	Putative Housekeeping proteins	Protein synthesis machinery	60S ribosomal protein L3 - signalP detected
209	Putative Housekeeping proteins	Protein synthesis machinery	60S ribosomal protein L31
163	Putative Housekeeping proteins	Protein synthesis machinery	60S ribosomal protein L32
125	Putative Housekeeping proteins	Protein synthesis machinery	60S ribosomal protein L34
240	Putative Housekeeping proteins	Protein synthesis machinery	60S ribosomal protein L37
154	Putative Housekeeping proteins	Protein synthesis machinery	60S ribosomal protein L5
107	Putative Housekeeping proteins	Protein synthesis machinery	60S ribosomal protein L8 Harpegnathos saltator
566	Putative Housekeeping proteins	Protein synthesis machinery	60S ribosomal protein L9
589	Putative Housekeeping proteins	Protein synthesis machinery	Alanyl-tRNA synthetase
21	Putative Housekeeping proteins	Protein synthesis machinery	Anopheles funestus 16S ribosomal RNA partial sequence; mitochondrial
507	Putative Housekeeping proteins	Protein synthesis machinery	Arginyl-tRNA synthetase
374	Putative Housekeeping proteins	Protein synthesis machinery	Drosophila persimilis ribosomal RNA (Dper\28SrRNA:GL28069) rRNA
114	Putative Housekeeping proteins	Protein synthesis machinery	elongation factor 1-alpha
115	Putative Housekeeping proteins	Protein synthesis machinery	elongation factor 1-alpha
116	Putative Housekeeping proteins	Protein synthesis machinery	elongation factor 1-alpha
745	Putative Housekeeping proteins	Protein synthesis machinery	eukaryotic translation initiation factor 2 subunit 2-like
598	Putative Housekeeping proteins	Protein synthesis machinery	Filamentous baseplate protein Ligatin contains PUA domain
204	Putative Housekeeping proteins	Protein synthesis machinery	Glutaminyl-tRNA synthetase
205	Putative Housekeeping proteins	Protein synthesis machinery	Glutaminyl-tRNA synthetase
385	Putative Housekeeping proteins	Protein synthesis machinery	Glycyl-tRNA synthetase
560	Putative Housekeeping proteins	Protein synthesis machinery	Mitochondrial/chloroplast ribosomal protein L24
453	Putative Housekeeping proteins	Protein synthesis machinery	Mitochondrial/chloroplast ribosomal protein S11
201	Putative Housekeeping proteins	Protein synthesis machinery	Polyadenylate-binding protein (RRM superfamily) - signalP detected
738	Putative Housekeeping proteins	Protein synthesis machinery	Protein required for 18S rRNA maturation and 40S ribosome biogenesis - signalP detected
541	Putative Housekeeping proteins	Protein synthesis machinery	Protein SEC13 homolog - mRNA transport - COPII vesicle coating - cellular protein metabolic process - post-translational protein modification -
162	Putative Housekeeping proteins	Protein synthesis machinery	Ribosomal L37ae protein family
213	Putative Housekeeping proteins	Protein synthesis machinery	Ribosomal L38e protein family
233	Putative Housekeeping proteins	Protein synthesis machinery	ribosomal protein L10A Bombyx mori
109	Putative Housekeeping proteins	Protein synthesis machinery	ribosomal protein L14 Tribolium castaneum
196	Putative Housekeeping proteins	Protein synthesis machinery	ribosomal protein L23e Tribolium castaneum
587	Putative Housekeeping proteins	Protein synthesis machinery	ribosomal protein L24
181	Putative Housekeeping proteins	Protein synthesis machinery	ribosomal protein L26e
243	Putative Housekeeping proteins	Protein synthesis machinery	ribosomal protein L27A
595	Putative Housekeeping proteins	Protein synthesis machinery	ribosomal protein L27e
780	Putative Housekeeping proteins	Protein synthesis machinery	ribosomal protein L27e
177	Putative Housekeeping proteins	Protein synthesis machinery	ribosomal protein L28e
396	Putative Housekeeping proteins	Protein synthesis machinery	ribosomal protein L29
214	Putative Housekeeping proteins	Protein synthesis machinery	ribosomal protein L30
215	Putative Housekeeping proteins	Protein synthesis machinery	ribosomal protein L30
186	Putative Housekeeping proteins	Protein synthesis machinery	ribosomal protein L35
182	Putative Housekeeping proteins	Protein synthesis machinery	ribosomal protein L35Ae Tribolium castaneum
99	Putative Housekeeping proteins	Protein synthesis machinery	Ribosomal protein L36e
98	Putative Housekeeping proteins	Protein synthesis machinery	Ribosomal protein L41
144	Putative Housekeeping proteins	Protein synthesis machinery	ribosomal protein L44e
145	Putative Housekeeping proteins	Protein synthesis machinery	ribosomal protein L44e
111	Putative Housekeeping proteins	Protein synthesis machinery	ribosomal protein L4e
285	Putative Housekeeping proteins	Protein synthesis machinery	Ribosomal protein L6e
729	Putative Housekeeping proteins	Protein synthesis machinery	Ribosomal protein L6e
289	Putative Housekeeping proteins	Protein synthesis machinery	ribosomal protein L7A
521	Putative Housekeeping proteins	Protein synthesis machinery	ribosomal protein P2 - signalP detected
140	Putative Housekeeping proteins	Protein synthesis machinery	ribosomal protein rps9
297	Putative Housekeeping proteins	Protein synthesis machinery	ribosomal protein S11-2
146	Putative Housekeeping proteins	Protein synthesis machinery	Ribosomal protein S18
129	Putative Housekeeping proteins	Protein synthesis machinery	Ribosomal protein S19e
151	Putative Housekeeping proteins	Protein synthesis machinery	Ribosomal protein S21e
651	Putative Housekeeping proteins	Protein synthesis machinery	ribosomal protein S24e
217	Putative Housekeeping proteins	Protein synthesis machinery	ribosomal protein S25
192	Putative Housekeeping proteins	Protein synthesis machinery	Ribosomal protein S26e
167	Putative Housekeeping proteins	Protein synthesis machinery	ribosomal protein S27
168	Putative Housekeeping proteins	Protein synthesis machinery	ribosomal protein S27
234	Putative Housekeeping proteins	Protein synthesis machinery	ribosomal protein S27
139	Putative Housekeeping proteins	Protein synthesis machinery	Ribosomal protein S4
96	Putative Housekeeping proteins	Protein synthesis machinery	ribosomal protein S6e
141	Putative Housekeeping proteins	Protein synthesis machinery	Ribosomal protein S9 - mitotic spindle elongation - mitotic spindle organization - rRNA binding - ribosome - structural constituent of ribosome -
306	Putative Housekeeping proteins	Protein synthesis machinery	ribosomal RNA (CR40766) rRNA
110	Putative Housekeeping proteins	Protein synthesis machinery	ribosome-associated protein P40 Tribolium castaneum - signalP detected
183	Putative Housekeeping proteins	Protein synthesis machinery	S10e ribosomal protein
238	Putative Housekeeping proteins	Protein synthesis machinery	S17e ribosomal protein Tribolium castaneum
720	Putative Housekeeping proteins	Protein synthesis machinery	Signal recognition particle protein 72 - dsRNA transport - 7S RNA binding - SRP-dependent cotranslational protein targeting to membrane - signal
197	Putative Housekeeping proteins	Protein synthesis machinery	Translation elongation factor EF-1 gamma
198	Putative Housekeeping proteins	Protein synthesis machinery	Translation elongation factor EF-1 gamma
751	Putative Housekeeping proteins	Protein synthesis machinery	Translation initiation factor 3 subunit e (eIF-3e)
531	Putative Housekeeping proteins	Protein synthesis machinery	Translation initiation factor 4F helicase subunit (eIF-4A)
646	Putative Housekeeping proteins	Protein synthesis machinery	Translation machinery associated TMA7
195	Putative Housekeeping proteins	Protein synthesis machinery	translationally controlled tumor protein
124	Putative Housekeeping proteins	Protein synthesis machinery	ubiquitin-ribosomal protein S30e fusion protein
783	Putative Housekeeping proteins	Signal transduction	Ca2+-binding protein EF-Hand protein superfamily
596	Putative Housekeeping proteins	Signal transduction	Mitogen-activated protein kinase kinase 1 interacting
567	Putative Housekeeping proteins	Signal transduction	protein phosphatase 1 catalytic subunit beta isoform 1
644	Putative Housekeeping proteins	Signal transduction	RhoGAP54D - signal transduction - intracellular
323	Putative Housekeeping proteins	Signal transduction	signal transducer - GTPase activator - regulation of G-protein coupled receptor protein signaling pathway
290	Putative Housekeeping proteins	Signal transduction	Uncharacterized protein - transferase transferring phosphorus-containing groups - ATP binding - protein serine/threonine kinase
315	Putative Housekeeping proteins	Signal transduction	Caspase 7 apoptosis-related cysteine peptidase - apoptosis - proteolysis - cysteine-type endopeptidase
579	Putative Housekeeping proteins	Signal transduction	programmed cell death 6-interacting protein
687	Putative Housekeeping proteins	Transcription machinery	Another transcription unit - biological_process - cellular_component - molecular_function
746	Putative Housekeeping proteins	Transcription machinery	DNA-directed RNA polymerase subunit RPB10
241	Putative Housekeeping proteins	Transcription machinery	Elongation factor 1 beta/delta chain
695	Putative Housekeeping proteins	Transcription machinery	Exon-exon junction complex Magoh component
632	Putative Housekeeping proteins	Transcription machinery	LOW QUALITY PROTEIN: transcription elongation factor SPT5
684	Putative Housekeeping proteins	Transcription machinery	Nuclear exosomal RNA helicase MTR4 DEAD-box superfamily
509	Putative Housekeeping proteins	Transcription machinery	RNA polymerase-associated protein CTR9 homolog
505	Putative Housekeeping proteins	Transcription machinery	Telomerase elongation inhibitor/RNA maturation protein PINX1
767	Putative Housekeeping proteins	Transcription machinery	transcription elongation factor 1 homolog isoform 1 Bombus terrestris
409	Putative Housekeeping proteins	Transcription machinery	Transcription regulator XNP/ATRX DEAD-box superfamily
368	Putative Housekeeping proteins	Transcription machinery	transcriptional regulator DJ-1
311	Putative Housekeeping proteins	Transcription machinery	Uncharacterized protein - regulation of transcription DNA-dependent - nucleus - DNA binding - chromatin
476	Putative Housekeeping proteins	Transcription machinery	retinoblastoma binding protein 4 like - ESC/E(Z) complex - DNA replication - regulation of transcription DNA-dependent - transcription - Membrane anchor detected
210	Putative Housekeeping proteins	Storage	vitellogenin 1
155	Putative Housekeeping proteins	Storage	vitellogenin C
156	Putative Housekeeping proteins	Storage	vitellogenin C
472	Putative Housekeeping proteins	Storage	ferritin Tribolium castaneum - Membrane anchor detected
321	Putative Housekeeping proteins	Transporters	ADP/ATP translocase
702	Putative Housekeeping proteins	Transporters	ATP binding - ATP-binding cassette (ABC) transporter complex - ATPase coupled to transmembrane movement of substances - transporter
502	Putative Housekeeping proteins	Transporters	Catecholamines up - regulation of epithelial cell migration open tracheal system - membrane - metal ion transport - transmembrane transport - metal
663	Putative Housekeeping proteins	Transporters	H+ transporting ATP synthase O subunit isoform 1 Bombyx mori
571	Putative Housekeeping proteins	Transporters	high-affinity choline transporter 1-like - signalP detected
307	Putative Housekeeping proteins	Transporters	lipid particle - ATP synthesis coupled proton transport - proton transport - mitochondrial proton-transporting ATP synthase complex coupling factor
235	Putative Housekeeping proteins	Transporters	mitochondrial import inner membrane translocase subunit Tim23 Pediculus humanus corporis
654	Putative Housekeeping proteins	Transporters	Protein transporter of the TRAM (translocating chain-associating membrane) superfamily
356	Putative Housekeeping proteins	Unknown conserved	Conserved secreted protein precursor - signalP detected
543	Putative Housekeeping proteins	Unknown conserved	AGAP009134-PA Anopheles gambiae str. PEST
712	Putative Housekeeping proteins	Unknown conserved	Ankyrin repeats
593	Putative Housekeeping proteins	Unknown conserved	CG4593 CG4593-PA Tribolium castaneum
454	Putative Housekeeping proteins	Unknown conserved	Derlin-2 - retrograde protein transport ER to cytosol - endoplasmic reticulum unfolded protein response - ER-associated protein catabolic process -
312	Putative Housekeeping proteins	Unknown conserved	GK18829 Drosophila willistoni
147	Putative Housekeeping proteins	Unknown conserved	Histidine phosphatase superfamily
643	Putative Housekeeping proteins	Unknown conserved	hypothetical protein
366	Putative Housekeeping proteins	Unknown conserved	hypothetical protein AaeL_AAEL002797 Aedes aegypti
429	Putative Housekeeping proteins	Unknown conserved	hypothetical protein AND_01233
603	Putative Housekeeping proteins	Unknown conserved	hypothetical protein AND_13780
369	Putative Housekeeping proteins	Unknown conserved	hypothetical protein SINV_00679
489	Putative Housekeeping proteins	Unknown conserved	hypothetical protein TcasGA2_TC001324
758	Putative Housekeeping proteins	Unknown conserved	large subunit GTPase 1 homolog
331	Putative Housekeeping proteins	Unknown conserved	Luehdorfia chinensis mitochondrion partial genome
202	Putative Housekeeping proteins	Unknown conserved	Polyadenylate-binding protein Pediculus humanus corporis
688	Putative Housekeeping proteins	Unknown conserved	probable nucleolar GTP-binding protein 1-like
206	Putative Housekeeping proteins	Unknown conserved	Protein of unknown function
756	Putative Housekeeping proteins	Unknown conserved	Protein of unknown function
430	Putative Housekeeping proteins	Unknown conserved	Uncharacterized conserved protein
377	Putative Housekeeping proteins	Unknown conserved	Conserved protein with signal anchor - Membrane anchor detected
682	Putative Housekeeping proteins	Transposable element	Outcast_Ele5_ORF1 -h 1e-40 -j 4
244	Putative Housekeeping proteins	Transposable element	RTE_Ele1_ORF1 -h 1e-60 -j 4
739	Putative Housekeeping proteins	Transposable element	RTE_Ele1_ORF1 -h 1e-60 -j 4
143	Unknown products		Hypothetical secreted protein precursor - signalP detected
9	Unknown products		Unknown product
82	Unknown products		Unknown product
166	Unknown products		Unknown product
193	Unknown products		Unknown product
224	Unknown products		Unknown product
248	Unknown products		Unknown product
253	Unknown products		Unknown product
255	Unknown products		Unknown product
256	Unknown products		Unknown product
257	Unknown products		Unknown product
258	Unknown products		Unknown product
259	Unknown products		Unknown product
260	Unknown products		Unknown product
262	Unknown products		Unknown product
263	Unknown products		Unknown product
265	Unknown products		Unknown product
268	Unknown products		Unknown product
272	Unknown products		Unknown product
274	Unknown products		Unknown product
275	Unknown products		Unknown product
276	Unknown products		Unknown product
278	Unknown products		Unknown product
279	Unknown products		Unknown product
280	Unknown products		Unknown product
282	Unknown products		Unknown product
283	Unknown products		Unknown product
284	Unknown products		Unknown product
286	Unknown products		Unknown product
293	Unknown products		Unknown product
294	Unknown products		Unknown product
296	Unknown products		Unknown product
300	Unknown products		Unknown product
301	Unknown products		Unknown product
319	Unknown products		Unknown product
322	Unknown products		Unknown product
326	Unknown products		Unknown product
332	Unknown products		Unknown product
333	Unknown products		Unknown product
334	Unknown products		Unknown product
335	Unknown products		Unknown product
336	Unknown products		Unknown product
339	Unknown products		Unknown product
340	Unknown products		Unknown product
344	Unknown products		Unknown product
345	Unknown products		Unknown product
347	Unknown products		Unknown product
348	Unknown products		Unknown product
350	Unknown products		Unknown product
351	Unknown products		Unknown product
359	Unknown products		Unknown product
360	Unknown products		Unknown product
362	Unknown products		Unknown product
365	Unknown products		Unknown product
372	Unknown products		Unknown product
380	Unknown products		Unknown product
386	Unknown products		Unknown product
391	Unknown products		Unknown product
395	Unknown products		Unknown product
397	Unknown products		Unknown product
408	Unknown products		Unknown product
410	Unknown products		Unknown product
441	Unknown products		Unknown product
450	Unknown products		Unknown product
471	Unknown products		Unknown product
478	Unknown products		Unknown product
480	Unknown products		Unknown product
486	Unknown products		Unknown product
493	Unknown products		Unknown product
494	Unknown products		Unknown product
495	Unknown products		Unknown product
496	Unknown products		Unknown product
500	Unknown products		Unknown product
504	Unknown products		Unknown product
506	Unknown products		Unknown product
511	Unknown products		Unknown product
512	Unknown products		Unknown product
517	Unknown products		Unknown product
519	Unknown products		Unknown product
525	Unknown products		Unknown product
529	Unknown products		Unknown product
530	Unknown products		Unknown product
535	Unknown products		Unknown product
545	Unknown products		Unknown product
546	Unknown products		Unknown product
550	Unknown products		Unknown product
552	Unknown products		Unknown product
553	Unknown products		Unknown product
555	Unknown products		Unknown product
559	Unknown products		Unknown product
569	Unknown products		Unknown product
573	Unknown products		Unknown product
574	Unknown products		Unknown product
581	Unknown products		Unknown product
585	Unknown products		Unknown product
592	Unknown products		Unknown product
594	Unknown products		Unknown product
599	Unknown products		Unknown product
613	Unknown products		Unknown product
614	Unknown products		Unknown product
618	Unknown products		Unknown product
621	Unknown products		Unknown product
624	Unknown products		Unknown product
625	Unknown products		Unknown product
631	Unknown products		Unknown product
645	Unknown products		Unknown product
647	Unknown products		Unknown product
648	Unknown products		Unknown product
649	Unknown products		Unknown product
657	Unknown products		Unknown product
658	Unknown products		Unknown product
665	Unknown products		Unknown product
667	Unknown products		Unknown product
670	Unknown products		Unknown product
677	Unknown products		Unknown product
689	Unknown products		Unknown product
691	Unknown products		Unknown product
699	Unknown products		Unknown product
704	Unknown products		Unknown product
705	Unknown products		Unknown product
716	Unknown products		Unknown product
733	Unknown products		Unknown product
736	Unknown products		Unknown product
741	Unknown products		Unknown product
749	Unknown products		Unknown product
757	Unknown products		Unknown product
765	Unknown products		Unknown product
774	Unknown products		Unknown product
776	Unknown products		Unknown product
784	Unknown products		Unknown product
786	Unknown products		Unknown product
793	Unknown products		Unknown product
803	Unknown products		Unknown product
444	Unknown products		Unknown product
269	Unknown products		Unknown product
642	Unknown products		Unknown product
299	Unknown products		Unknown product
355	Unknown products		Unknown product
583	Unknown products		Unknown product
617	Unknown products		Unknown product
655	Unknown products		Unknown product
313	Unknown products		Unknown product
389	Unknown products		Unknown product
708	Unknown products		Unknown product
636	Unknown products		Unknown product
338	Unknown products		Unknown product
403	Unknown products		Unknown product
731	Unknown products		Unknown product
309	Unknown products		Unknown product
438	Unknown products		Unknown product
662	Unknown products		Unknown product
683	Unknown products		Unknown product
11	Unknown products		Unknown product
304	Unknown products		Unknown product
316	Unknown products		Unknown product
497	Unknown products		Unknown product
635	Unknown products		Unknown product
482	Unknown products		Unknown product
42	Unknown products		Unknown product
484	Unknown products		Unknown product
428	Unknown products		Unknown product
281	Unknown products		Unknown product
456	Unknown products		Unknown product
342	Unknown products		Unknown product
709	Unknown products		Unknown product
432	Unknown products		Unknown product
477	Unknown products		Unknown product
30	Unknown products		Unknown product
337	Unknown products		Unknown product
199	Unknown products		Unknown product
379	Unknown products		Unknown product
612	Unknown products		Unknown product
84	Unknown products		Unknown product
329	Unknown products		Unknown product
797	Unknown products		Unknown product
292	Unknown products		Unknown product
373	Unknown products		Unknown product
138	Unknown products		Unknown product
777	Unknown products		Unknown product
470	Unknown products		Unknown product
634	Unknown products		Unknown product
266	Unknown products		Unknown product
773	Unknown products		Unknown product
498	Unknown products		Unknown product
492	Unknown products		Unknown product
605	Unknown products		Unknown product
565	Unknown products		Unknown product
681	Unknown products		Unknown product
532	Unknown products		Unknown product
788	Unknown products		Unknown product
747	Unknown products		Unknown product - Membrane anchor detected
568	Unknown products		Unknown product
542	Unknown products		Unknown product
131	Unknown products		Unknown product
474	Unknown products		Unknown product
641	Unknown products		Unknown product
485	Unknown products		Unknown product
45	Unknown products		Unknown product
46	Unknown products		Unknown product
384	Unknown products		Unknown product
400	Unknown products		Unknown product
717	Unknown products		Unknown product
149	Unknown products		Unknown product
528	Unknown products		Unknown product
247	Unknown products		Unknown product
112	Unknown products		Unknown product
678	Unknown products		Unknown product
590	Unknown products		Unknown product
302	Unknown products		Unknown product
804	Unknown products		Unknown product
604	Unknown products		Unknown product
608	Unknown products		Unknown product
27	Unknown products		Unknown product
551	Unknown products		Unknown product
92	Unknown products		Unknown product
611	Unknown products		Unknown product
582	Unknown products		Unknown product
250	Unknown products		Unknown product
572	Unknown products		Unknown product
447	Unknown products		Unknown product
652	Unknown products		Unknown product
435	Unknown products		Unknown product
515	Unknown products		Unknown product
790	Unknown products		Unknown product
398	Unknown products		Unknown product
415	Unknown products		Unknown product
126	Unknown products		Unknown product
633	Unknown products		Unknown product
711	Unknown products		Unknown product
127	Unknown products		Unknown product
461	Unknown products		Unknown product
159	Unknown products		Unknown product
740	Unknown products		Unknown product
175	Unknown products		Unknown product
627	Unknown products		Unknown product
317	Unknown products		Unknown product
382	Unknown products		Unknown product
458	Unknown products		Unknown product
431	Unknown products		Unknown product
164	Unknown products		Unknown product
308	Unknown products		Unknown product
491	Unknown products		Unknown product
575	Unknown products		Unknown product
763	Unknown products		Unknown product
405	Unknown products		Unknown product
433	Unknown products		Unknown product
427	Unknown products		Unknown product
660	Unknown products		Unknown product
544	Unknown products		Unknown product
434	Unknown products		Unknown product
481	Unknown products		Unknown product
419	Unknown products		Unknown product
483	Unknown products		Unknown product
381	Unknown products		Unknown product
383	Unknown products		Unknown product
557	Unknown products		Unknown product
795	Unknown products		Unknown product
442	Unknown products		Unknown product
722	Unknown products		Unknown product
680	Unknown products		Unknown product
174	Unknown products		Unknown product
473	Unknown products		Unknown product
676	Unknown products		Unknown product
173	Unknown products		Unknown product
330	Unknown products		Unknown product
789	Unknown products		Unknown product
549	Unknown products		Unknown product
161	Unknown products		Unknown product
254	Unknown products		Unknown product
759	Unknown products		Unknown product
742	Unknown products		Unknown product
252	Unknown products		Unknown product
376	Unknown products		Unknown product
191	Unknown products		Unknown product
354	Unknown products		Unknown product
671	Unknown products		Unknown product
264	Unknown products		Unknown product
558	Unknown products		Unknown product
357	Unknown products		Unknown product
779	Unknown products		Unknown product
211	Unknown products		Unknown product
212	Unknown products		Unknown product
318	Unknown products		Unknown product
185	Unknown products		Unknown product
388	Unknown products		Unknown product
487	Unknown products		Unknown product
602	Unknown products		Unknown product
207	Unknown products		Unknown product
218	Unknown products		Unknown product
33	Unknown products		Unknown product
503	Unknown products		Unknown product
732	Unknown products		Unknown product
26	Unknown products		Unknown product
401	Unknown products		Unknown product
479	Unknown products		Unknown product
768	Unknown products		Unknown product
43	Unknown products		Unknown product
85	Unknown products		Unknown product
314	Unknown products		Unknown product
58	Unknown products		Unknown product
425	Unknown products		Unknown product
578	Unknown products		Unknown product
672	Unknown products		Unknown product
295	Unknown products		Unknown product
399	Unknown products		Unknown product
619	Unknown products		Unknown product
475	Unknown products		Unknown product
513	Unknown products		Unknown product
523	Unknown products		Unknown product
443	Unknown products		Unknown product
35	Unknown products		Unknown product
135	Unknown products		Unknown product
679	Unknown products		Unknown product
291	Unknown products		Unknown product
686	Unknown products		Unknown product
416	Unknown products		Unknown product
463	Unknown products		Unknown product
707	Unknown products		Unknown product
713	Unknown products		Unknown product
394	Unknown products		Unknown product
805	Unknown products		Unknown product
748	Unknown products		Unknown product
76	Unknown products		Unknown product
18	Unknown products		Unknown product
464	Unknown products		Unknown product
778	Unknown products		Unknown product
588	Unknown products		Unknown product
245	Unknown products		Unknown product
327	Unknown products		Unknown product
375	Unknown products		Unknown product
3	Unknown products		Unknown product
706	Unknown products		Unknown product
457	Unknown products		Unknown product
237	Unknown products		Unknown product
228	Unknown products		Unknown product
137	Unknown products		Unknown product
723	Unknown products		Unknown product
287	Unknown products		Unknown product
101	Unknown products		Unknown product
78	Unknown products		Unknown product
227	Unknown products		Unknown product
8	Unknown products		Unknown product
32	Unknown products		Unknown product
570	Unknown products		Unknown product
771	Unknown products		Unknown product
762	Unknown products		Unknown product
610	Unknown products		Unknown product
414	Unknown products		Unknown product
236	Unknown products		Unknown product
273	Unknown products		Unknown product
343	Unknown products		Unknown product
353	Unknown products		Unknown product
522	Unknown products		Unknown product
674	Unknown products		Unknown product
734	Unknown products		Unknown product
737	Unknown products		Unknown product
629	Unknown products		Unknown product
22	Unknown products		Unknown product
703	Unknown products		Unknown product
270	Unknown products		Unknown product
404	Unknown products		Unknown product
499	Unknown products		Unknown product
656	Unknown products		Unknown product
548	Unknown products		Unknown product
165	Unknown products		Unknown product
219	Unknown products		Unknown product
526	Unknown products		Unknown product
4	Unknown products		Unknown product
72	Unknown products		Unknown product
122	Unknown products		Unknown product
184	Unknown products		Unknown product
562	Unknown products		Unknown product
392	Unknown products		Unknown product
20	Unknown products		Unknown product
561	Unknown products		Unknown product
700	Unknown products		Unknown product
325	Unknown products		Unknown product
436	Unknown products		Unknown product
533	Unknown products		Unknown product
730	Unknown products		Unknown product
782	Unknown products		Unknown product
620	Unknown products		Unknown product
539	Unknown products		Unknown product
87	Unknown products		Unknown product
36	Unknown products		Unknown product
468	Unknown products		Unknown product
770	Unknown products		Unknown product
418	Unknown products		Unknown product
659	Unknown products		Unknown product
540	Unknown products		Unknown product
349	Unknown products		Unknown product
53	Unknown products		Unknown product
452	Unknown products		Unknown product
715	Unknown products		Unknown product
661	Unknown products		Unknown product
361	Unknown products		Unknown product
488	Unknown products		Unknown product
466	Unknown products		Unknown product
93	Unknown products		Unknown product
446	Unknown products		Unknown product
752	Unknown products		Unknown product
44	Unknown products		Unknown product
271	Unknown products		Unknown product
600	Unknown products		Unknown product
675	Unknown products		Unknown product
24	Unknown products		Unknown product
518	Unknown products		Unknown product
158	Unknown products		Unknown product
305	Unknown products		Unknown product
77	Unknown products		Unknown product
28	Unknown products		Unknown product
694	Unknown products		Unknown product
615	Unknown products		Unknown product
267	Unknown products		Unknown product
226	Unknown products		Unknown product
136	Unknown products		Unknown product
640	Unknown products		Unknown product
324	Unknown products		Unknown product
796	Unknown products		Unknown product
352	Unknown products		Unknown product
606	Unknown products		Unknown product
799	Unknown products		Unknown product
710	Unknown products		Unknown product
465	Unknown products		Unknown product
639	Unknown products		Unknown product
577	Unknown products		Unknown product
616	Unknown products		Unknown product
417	Unknown products		Unknown product
650	Unknown products		Unknown product
34	Unknown products		Unknown product
690	Unknown products		Unknown product
794	Unknown products		Unknown product
769	Unknown products		Unknown product
176	Unknown products		Unknown product
534	Unknown products		Unknown product
692	Unknown products		Unknown product
772	Unknown products		Unknown product
133	Unknown products		Unknown product
800	Unknown products		Unknown product
229	Unknown products		Unknown product
725	Unknown products		Unknown product
86	Unknown products		Unknown product
160	Unknown products		Unknown product
57	Unknown products		Unknown product
407	Unknown products		Unknown product
448	Unknown products		Unknown product
467	Unknown products		Unknown product
719	Unknown products		Unknown product
411	Unknown products		Unknown product
23	Unknown products		Unknown product
367	Unknown products		Unknown product
88	Unknown products		Unknown product
554	Unknown products		Unknown product
424	Unknown products		Unknown product
714	Unknown products		Unknown product
132	Unknown products		Unknown product
390	Unknown products		Unknown product
328	Unknown products		Unknown product
216	Unknown products		Unknown product

## Sheet: Sheet2
Table I: Functional classification of the sialotranscriptome of the cat flea, Ctenocephalides felis
Class	Number of contigs	Number of ESTs	EST's/Contig				contigs	ests
Putative secreted proteins	91	478	5.25275			Secreted	91	11.2903		Secreted	478	27.4713
Enzymes						Housekeeping	253	31.3896		Housekeeping	558	32.069
Phosphatase	21	81	3.85714			Transposable element	3	0.372208		Transposable element	4	0.229885
Apyrase	3	13	4.33333			Unknown products	459	56.9479		Unknown products	700	40.2299
5'-nucleotidase	2	2	1
Adenosine deaminase	4	16	4				806	100			1740	100
Esterase	3	15	5
Antigen 5 family	3	15	5
Immunity related
Attacin	1	3	3
Defensins	5	5	1
Flea -specific families
FS-H family	19	42	2.21053
Short peptide family	8	116	14.5
Abundant very short peptide family	7	124	17.7143
FS-I antigen	1	5	5
Deorphanized flea proteins	4	17	4.25
Other putative secreted peptides	10	24	2.4
Putative Housekeeping proteins	253	558	2.20553
Protein synthesis machinery	118	397	3.36441
Unknown conserved	21	23	1.09524
Proteasome machinery	9	17	1.88889
Cytoskeletal	14	16	1.14286
Metabolism, energy	15	15	1
Transcription machinery	13	15	1.15385
Protein modification	12	14	1.16667
Transporters	8	10	1.25
Storage	4	9	2.25
Signal transduction	8	8	1
Metabolism, carbohydrate	7	7	1
Protein Export	7	7	1
Metabolism, amino acid	6	6	1
Immunity related	3	4	1.33333
Extracellular matrix	1	3	3
Metabolism, lipid	3	3	1
Nuclear Regulation	2	2	1
Metabolism, intermediary	1	1	1
Metabolism, nucleotide	1	1	1
Transposable element	3	4	1.33333
Unknown products	459	700	1.52505
Total	806	1740
	0.313896	0.402299
